# Supplementary material for: Pan-genome of Novel <em>Pantoea stewartii</em> subsp. <em>indologenes</em> Reveal Genes Involved in Onion Pathogenicity and Evidence of Lateral Gene Transfer
Source: Preprints.org preprint supplement (doi:10.20944/preprints202107.0400.v1), 2021-07-19
Supplement: Supplementary file 2 [file supplementary]

## Sheet: S1
Table S1: Details of the number of core and accessory genes contributed by each strain
Strain name	Cloud	Shell	Soft-core (including 3546 core genes)
NCPPB 1562	286	489	3682
NCPPB 1877	130	530	3681
NCPPB 2275	130	528	3679
NCPPB 2281	107	457	3681
NCPPB 2282	287	491	3681
LMG 2632T	382	433	3580
PANS 07-10	265	584	3682
PANS 07-12	263	585	3682
PANS 07-14	171	503	3676
PANS 07-4	202	699	3679
PANS 07-6	229	703	3682
PNA 15-2	127	394	3675
PANS 99-15	148	520	3682
PNA 14-11	6	560	3681
PNA 14-12	5	558	3682
PNA 14-9	18	561	3677
PNA 03-3	259	556	3676

## Sheet: S2
Table S2: List of genes involved in horizontal gene transfer among the twentyone strains used in this study. Description is the protein coded by these genes and direction shows the gene flow from one strain to another. Depending upon the direction a strain (gene) is defined as a donor or a recipient.
Gene_1	Species	Description	Gene_2	Species	Identity	Direction		No. of HGTs	HGT direction		No. of donors	Donors		No. of recepients	Recepients
NCPPB2275_00009	P. stewartii subs. indologenes pv. setariae	murein lipoprotein	PANS_07_4_00862	P. stewartii subs. indologenes pv. setariae pv. nov.	100	NCPPB2275-->PANS_07_4		95	PNA_03_3-->PANS_07_4		112	NCPPB2275		211	PANS_07_4
NCPPB2275_00026	P. stewartii subs. indologenes pv. setariae	endopeptidase	PANS_07_4_00879	P. stewartii subs. indologenes pv. setariae pv. nov.	100	NCPPB2275-->PANS_07_4		76	NCPPB2275-->PANS_07_4		100	PNA_03_3		40	PANS_07_10
NCPPB2275_00028	P. stewartii subs. indologenes pv. setariae	glutathione peroxidase	PANS_07_4_00881	P. stewartii subs. indologenes pv. setariae pv. nov.	100	NCPPB2275-->PANS_07_4		32	NCPPB2281-->PANS_07_4		35	NCPPB2281		16	PNA_14_11
NCPPB2275_00030	P. stewartii subs. indologenes pv. setariae	integration host factor subunit alpha	PANS_07_4_00883	P. stewartii subs. indologenes pv. setariae pv. nov.	100	NCPPB2275-->PANS_07_4		27	NCPPB2275-->PANS_07_10		17	PANS_07_4		13	PANS_99_15
NCPPB2275_00032	P. stewartii subs. indologenes pv. setariae	phenylalanine--tRNA ligase subunit alpha	PANS_07_4_00885	P. stewartii subs. indologenes pv. setariae pv. nov.	100	NCPPB2275-->PANS_07_4		9	PANS_07_4-->PANS_07_10		14	PANS_99_15		10	PANS_07_14
NCPPB2275_00033	P. stewartii subs. indologenes pv. setariae	50S ribosomal protein L20	PANS_07_4_00886	P. stewartii subs. indologenes pv. setariae pv. nov.	100	NCPPB2275-->PANS_07_4		5	NCPPB2275-->PNA_14_11		11	PANS_07_14		8	PNA_15_2
NCPPB2275_00035	P. stewartii subs. indologenes pv. setariae	translation initiation factor IF-3	PANS_07_4_00888	P. stewartii subs. indologenes pv. setariae pv. nov.	100	NCPPB2275-->PANS_07_4		5	PANS_07_14-->PNA_14_11		10	PANS_07_12		7	PNA_03_3
NCPPB2275_00042	P. stewartii subs. indologenes pv. setariae	hexitol phosphatase HxpB	PANS_07_10_01190	P. stewartii subs. indologenes pv. setariae pv. nov.	99.851	NCPPB2275-->PANS_07_10		4	PANS_07_10-->PANS_99_15		7	PNA_15_2		4	PANS_07_12
NCPPB2275_00043	P. stewartii subs. indologenes pv. setariae	metal-dependent hydrolase	PANS_07_4_00895	P. stewartii subs. indologenes pv. setariae pv. nov.	99.831	NCPPB2275-->PANS_07_4		4	PANS_07_12-->PANS_99_15		5	PANS_07_10		3	NCPPB1562
NCPPB2275_00061	P. stewartii subs. indologenes pv. setariae	ABC transporter permease	PANS_07_10_01171	P. stewartii subs. indologenes pv. setariae pv. nov.	99.813	NCPPB2275-->PANS_07_10		4	PANS_99_15-->PANS_07_10		3	NCPPB2282		2	LMG2632
NCPPB2275_00075	P. stewartii subs. indologenes pv. setariae	DotU family type IV/VI secretion system protein	PANS_07_4_00927	P. stewartii subs. indologenes pv. setariae pv. nov.	99.836	NCPPB2275-->PANS_07_4		4	PNA_15_2-->PANS_07_14		2	PNA_14_11		2	PANS_07_6
NCPPB2275_00080	P. stewartii subs. indologenes pv. setariae	putative type VI secretion system-associated protein	PANS_07_4_00932	P. stewartii subs. indologenes pv. setariae pv. nov.	99.894	NCPPB2275-->PANS_07_4		3	NCPPB2275-->PANS_07_14		1	PANS_07_6		1	NCPPB2282
NCPPB2275_00091	P. stewartii subs. indologenes pv. setariae	lipoprotein localization protein LolB	PANS_07_4_00943	P. stewartii subs. indologenes pv. setariae pv. nov.	99.841	NCPPB2275-->PANS_07_4		3	NCPPB2281-->NCPPB1562
NCPPB2275_00095	P. stewartii subs. indologenes pv. setariae	stress-induced protein YchH	PANS_07_4_00947	P. stewartii subs. indologenes pv. setariae pv. nov.	100	NCPPB2275-->PANS_07_4		3	PANS_07_12-->PANS_07_4
NCPPB2275_00096	P. stewartii subs. indologenes pv. setariae	aminoacyl-tRNA hydrolase	PANS_07_10_01136	P. stewartii subs. indologenes pv. setariae pv. nov.	100	NCPPB2275-->PANS_07_10		3	PANS_07_4-->PANS_07_12
NCPPB2275_00099	P. stewartii subs. indologenes pv. setariae	chemotaxis protein	PANS_07_4_00951	P. stewartii subs. indologenes pv. setariae pv. nov.	99.935	NCPPB2275-->PANS_07_4		3	PANS_07_4-->PNA_03_3
NCPPB2275_00108	P. stewartii subs. indologenes pv. setariae	unnamed protein product	PANS_07_4_00960	P. stewartii subs. indologenes pv. setariae pv. nov.	100	NCPPB2275-->PANS_07_4		3	PANS_99_15-->PANS_07_4
NCPPB2275_00147	P. stewartii subs. indologenes pv. setariae	four-helix bundle copper-binding protein	PANS_07_4_01014	P. stewartii subs. indologenes pv. setariae pv. nov.	100	NCPPB2275-->PANS_07_4		2	NCPPB2282-->PNA_14_11
NCPPB2275_00197	P. stewartii subs. indologenes pv. setariae	GlsB/YeaQ/YmgE family stress response membrane protein	PANS_07_4_01067	P. stewartii subs. indologenes pv. setariae pv. nov.	100	NCPPB2275-->PANS_07_4		2	PANS_07_12-->PNA_15_2
NCPPB2275_00208	P. stewartii subs. indologenes pv. setariae	MULTISPECIES: hypothetical protein	PANS_07_4_01078	P. stewartii subs. indologenes pv. setariae pv. nov.	100	NCPPB2275-->PANS_07_4		2	PANS_07_14-->PANS_99_15
NCPPB2275_00222	P. stewartii subs. indologenes pv. setariae	hypothetical protein	PANS_07_4_01092	P. stewartii subs. indologenes pv. setariae pv. nov.	99.802	NCPPB2275-->PANS_07_4		2	PANS_07_14-->PNA_15_2
NCPPB2275_00245	P. stewartii subs. indologenes pv. setariae	penicillin-binding protein activator LpoB	PANS_07_4_01114	P. stewartii subs. indologenes pv. setariae pv. nov.	99.834	NCPPB2275-->PANS_07_4		2	PANS_99_15-->PANS_07_14
NCPPB2275_00246	P. stewartii subs. indologenes pv. setariae	DUF1425 domain-containing protein	PANS_07_4_01115	P. stewartii subs. indologenes pv. setariae pv. nov.	100	NCPPB2275-->PANS_07_4		2	PANS_99_15-->PNA_14_11
NCPPB2275_00247	P. stewartii subs. indologenes pv. setariae	purine nucleoside phosphoramidase	PANS_07_4_01116	P. stewartii subs. indologenes pv. setariae pv. nov.	100	NCPPB2275-->PANS_07_4		2	PNA_03_3-->PNA_14_11
NCPPB2275_00256	P. stewartii subs. indologenes pv. setariae	Acyl carrier protein	PANS_07_4_01125	P. stewartii subs. indologenes pv. setariae pv. nov.	100	NCPPB2275-->PANS_07_4		1	NCPPB2275-->PNA_15_2
NCPPB2275_00257	P. stewartii subs. indologenes pv. setariae	3-oxoacyl-ACP reductase FabG	PANS_07_4_01126	P. stewartii subs. indologenes pv. setariae pv. nov.	100	NCPPB2275-->PANS_07_4		1	NCPPB2282-->PANS_07_6
NCPPB2275_00259	P. stewartii subs. indologenes pv. setariae	ketoacyl-ACP synthase III	PANS_07_10_00939	P. stewartii subs. indologenes pv. setariae pv. nov.	99.79	NCPPB2275-->PANS_07_10		1	PANS_07_10-->PNA_03_3
NCPPB2275_00262	P. stewartii subs. indologenes pv. setariae	23S rRNA accumulation protein YceD	PANS_07_4_01131	P. stewartii subs. indologenes pv. setariae pv. nov.	100	NCPPB2275-->PANS_07_4		1	PANS_07_12-->PNA_03_3
NCPPB2275_00268	P. stewartii subs. indologenes pv. setariae	flagellar assembly peptidoglycan hydrolase FlgJ	PANS_07_4_01137	P. stewartii subs. indologenes pv. setariae pv. nov.	99.894	NCPPB2275-->PANS_07_4		1	PANS_07_14-->LMG2632
NCPPB2275_00273	P. stewartii subs. indologenes pv. setariae	flagellar hook protein FlgE	PANS_07_4_01142	P. stewartii subs. indologenes pv. setariae pv. nov.	99.84	NCPPB2275-->PANS_07_4		1	PANS_07_14-->PNA_03_3
NCPPB2275_00275	P. stewartii subs. indologenes pv. setariae	flagellar basal body rod protein FlgC	PANS_07_4_01144	P. stewartii subs. indologenes pv. setariae pv. nov.	100	NCPPB2275-->PANS_07_4		1	PANS_07_4-->PANS_99_15
NCPPB2275_00279	P. stewartii subs. indologenes pv. setariae	flagellar biosynthesis protein FlgN	PANS_07_10_00919	P. stewartii subs. indologenes pv. setariae pv. nov.	100	NCPPB2275-->PANS_07_10		1	PANS_07_4-->PNA_15_2
NCPPB2275_00285	P. stewartii subs. indologenes pv. setariae	lipoprotein	PANS_07_4_01154	P. stewartii subs. indologenes pv. setariae pv. nov.	100	NCPPB2275-->PANS_07_4		1	PANS_07_6-->PNA_03_3
NCPPB2275_00286	P. stewartii subs. indologenes pv. setariae	dihydroorotase	PANS_07_4_01155	P. stewartii subs. indologenes pv. setariae pv. nov.	99.904	NCPPB2275-->PANS_07_4		1	PANS_99_15-->LMG2632
NCPPB2275_00288	P. stewartii subs. indologenes pv. setariae	Uncharacterised protein	PANS_07_4_01157	P. stewartii subs. indologenes pv. setariae pv. nov.	100	NCPPB2275-->PANS_07_4		1	PANS_99_15-->PANS_07_12
NCPPB2275_00289	P. stewartii subs. indologenes pv. setariae	biofilm formation regulator BssS	PANS_07_4_01158	P. stewartii subs. indologenes pv. setariae pv. nov.	100	NCPPB2275-->PANS_07_4		1	PANS_99_15-->PNA_15_2
NCPPB2275_00309	P. stewartii subs. indologenes pv. setariae	AraC family transcriptional regulator	PANS_07_4_01178	P. stewartii subs. indologenes pv. setariae pv. nov.	100	NCPPB2275-->PANS_07_4		1	PNA_03_3-->PANS_07_14
NCPPB2275_00369	P. stewartii subs. indologenes pv. setariae	DUF882 domain-containing protein	PANS_07_10_00827	P. stewartii subs. indologenes pv. setariae pv. nov.	99.819	NCPPB2275-->PANS_07_10		1	PNA_03_3-->PANS_07_6
NCPPB2275_00394	P. stewartii subs. indologenes pv. setariae	outer membrane lipoprotein chaperone LolA	PANS_07_10_00802	P. stewartii subs. indologenes pv. setariae pv. nov.	99.837	NCPPB2275-->PANS_07_10		1	PNA_03_3-->PNA_15_2
NCPPB2275_00418	P. stewartii subs. indologenes pv. setariae	DUF2593 family protein	PANS_07_10_00777	P. stewartii subs. indologenes pv. setariae pv. nov.	100	NCPPB2275-->PANS_07_10		1	PNA_14_11-->PANS_07_4
NCPPB2275_00429	P. stewartii subs. indologenes pv. setariae	membrane protein	PANS_07_14_00540	P. stewartii subs. indologenes pv. setariae pv. nov.	100	NCPPB2275-->PANS_07_14		1	PNA_14_11-->PANS_99_15
NCPPB2275_00530	P. stewartii subs. indologenes pv. setariae	3-deoxy-7-phosphoheptulonate synthase AroG	PANS_07_14_00439	P. stewartii subs. indologenes pv. setariae pv. nov.	99.81	NCPPB2275-->PANS_07_14		1	PNA_15_2-->NCPPB2282
NCPPB2275_00545	P. stewartii subs. indologenes pv. setariae	Tol-Pal system protein TolQ	PANS_07_10_01381	P. stewartii subs. indologenes pv. setariae pv. nov.	99.854	NCPPB2275-->PANS_07_10		1	PNA_15_2-->PANS_07_4
NCPPB2275_00553	P. stewartii subs. indologenes pv. setariae	2-oxoglutarate dehydrogenase complex dihydrolipoyllysine-residue succinyltransferase	PANS_07_10_01389	P. stewartii subs. indologenes pv. setariae pv. nov.	99.837	NCPPB2275-->PANS_07_10		1	PNA_15_2-->PANS_99_15
NCPPB2275_00560	P. stewartii subs. indologenes pv. setariae	GNAT family N-acetyltransferase	PNA_14_11_03131	P. stewartii subs. indologenes pv. cepacicola	99.83	NCPPB2275-->PNA_14_11
NCPPB2275_00597	P. stewartii subs. indologenes pv. setariae	glutamate/aspartate ABC transporter permease GltK	PANS_07_4_03080	P. stewartii subs. indologenes pv. setariae pv. nov.	100	NCPPB2275-->PANS_07_4
NCPPB2275_00598	P. stewartii subs. indologenes pv. setariae	amino acid ABC transporter ATP-binding protein	PANS_07_4_03079	P. stewartii subs. indologenes pv. setariae pv. nov.	100	NCPPB2275-->PANS_07_4
NCPPB2275_00644	P. stewartii subs. indologenes pv. setariae	hypothetical protein C7433_1011276	PANS_07_4_03032	P. stewartii subs. indologenes pv. setariae pv. nov.	100	NCPPB2275-->PANS_07_4
NCPPB2275_00666	P. stewartii subs. indologenes pv. setariae	hypothetical protein HA47_06970	PANS_07_4_03011	P. stewartii subs. indologenes pv. setariae pv. nov.	100	NCPPB2275-->PANS_07_4
NCPPB2275_00884	P. stewartii subs. indologenes pv. setariae	mannosyltransferase	PANS_07_4_03092	P. stewartii subs. indologenes pv. setariae pv. nov.	99.803	NCPPB2275-->PANS_07_4
NCPPB2275_00988	P. stewartii subs. indologenes pv. setariae	ribonuclease E inhibitor RraB	PANS_07_4_03203	P. stewartii subs. indologenes pv. setariae pv. nov.	100	NCPPB2275-->PANS_07_4
NCPPB2275_01019	P. stewartii subs. indologenes pv. setariae	ribosome maturation factor RimP	PANS_07_4_03234	P. stewartii subs. indologenes pv. setariae pv. nov.	100	NCPPB2275-->PANS_07_4
NCPPB2275_01020	P. stewartii subs. indologenes pv. setariae	preprotein translocase subunit SecG	PANS_07_4_03235	P. stewartii subs. indologenes pv. setariae pv. nov.	100	NCPPB2275-->PANS_07_4
NCPPB2275_01021	P. stewartii subs. indologenes pv. setariae	phosphoglucosamine mutase	PANS_07_4_03236	P. stewartii subs. indologenes pv. setariae pv. nov.	99.925	NCPPB2275-->PANS_07_4
NCPPB2275_01034	P. stewartii subs. indologenes pv. setariae	BolA family iron metabolism protein IbaG	PANS_07_10_02117	P. stewartii subs. indologenes pv. setariae pv. nov.	100	NCPPB2275-->PANS_07_10
NCPPB2275_01042	P. stewartii subs. indologenes pv. setariae	3-deoxy-manno-octulosonate-8-phosphatase KdsC	PANS_07_4_03257	P. stewartii subs. indologenes pv. setariae pv. nov.	99.824	NCPPB2275-->PANS_07_4
NCPPB2275_01046	P. stewartii subs. indologenes pv. setariae	RNA polymerase factor sigma-54	PANS_07_10_02105	P. stewartii subs. indologenes pv. setariae pv. nov.	99.861	NCPPB2275-->PANS_07_10
NCPPB2275_01072	P. stewartii subs. indologenes pv. setariae	FxsA family protein	PANS_07_4_03287	P. stewartii subs. indologenes pv. setariae pv. nov.	100	NCPPB2275-->PANS_07_4
NCPPB2275_01101	P. stewartii subs. indologenes pv. setariae	3-dehydro-L-gulonate 2-dehydrogenase	PANS_07_4_03408	P. stewartii subs. indologenes pv. setariae pv. nov.	99.803	NCPPB2275-->PANS_07_4
NCPPB2275_01111	P. stewartii subs. indologenes pv. setariae	NADPH-dependent L-lysine N(6)-monooxygenase	PANS_07_4_03418	P. stewartii subs. indologenes pv. setariae pv. nov.	99.85	NCPPB2275-->PANS_07_4
NCPPB2275_01148	P. stewartii subs. indologenes pv. setariae	response regulator	PANS_07_10_01888	P. stewartii subs. indologenes pv. setariae pv. nov.	99.848	NCPPB2275-->PANS_07_10
NCPPB2275_01169	P. stewartii subs. indologenes pv. setariae	CidA/LrgA family protein	PANS_07_4_03475	P. stewartii subs. indologenes pv. setariae pv. nov.	100	NCPPB2275-->PANS_07_4
NCPPB2275_01177	P. stewartii subs. indologenes pv. setariae	teichuronopeptide biosynthesis TupA-like protein	PANS_07_4_03483	P. stewartii subs. indologenes pv. setariae pv. nov.	99.895	NCPPB2275-->PANS_07_4
NCPPB2275_01185	P. stewartii subs. indologenes pv. setariae	single-stranded DNA-binding protein SSB1	PANS_07_4_03491	P. stewartii subs. indologenes pv. setariae pv. nov.	99.816	NCPPB2275-->PANS_07_4
NCPPB2275_01198	P. stewartii subs. indologenes pv. setariae	zinc uptake transcriptional repressor Zur	PANS_07_10_01840	P. stewartii subs. indologenes pv. setariae pv. nov.	99.808	NCPPB2275-->PANS_07_10
NCPPB2275_01567	P. stewartii subs. indologenes pv. setariae	signal peptide prediction	PANS_07_14_00901	P. stewartii subs. indologenes pv. setariae pv. nov.	99.916	NCPPB2275-->PANS_07_14
NCPPB2275_02649	P. stewartii subs. indologenes pv. setariae	amylovoran biosynthesis protein AmsD	PANS_07_4_00039	P. stewartii subs. indologenes pv. setariae pv. nov.	99.903	NCPPB2275-->PANS_07_4
NCPPB2275_02660	P. stewartii subs. indologenes pv. setariae	dTDP-4-dehydrorhamnose 3,5-epimerase	PANS_07_4_00050	P. stewartii subs. indologenes pv. setariae pv. nov.	100	NCPPB2275-->PANS_07_4
NCPPB2275_02733	P. stewartii subs. indologenes pv. setariae	GlxA family transcriptional regulator	PANS_07_4_00123	P. stewartii subs. indologenes pv. setariae pv. nov.	99.913	NCPPB2275-->PANS_07_4
NCPPB2275_02754	P. stewartii subs. indologenes pv. setariae	ABC transporter permease	PANS_07_4_00143	P. stewartii subs. indologenes pv. setariae pv. nov.	100	NCPPB2275-->PANS_07_4
NCPPB2275_02755	P. stewartii subs. indologenes pv. setariae	ABC transporter ATP-binding protein	PANS_07_4_00144	P. stewartii subs. indologenes pv. setariae pv. nov.	99.82	NCPPB2275-->PANS_07_4
NCPPB2275_02780	P. stewartii subs. indologenes pv. setariae	sugar ABC transporter ATP-binding protein	PANS_07_4_00168	P. stewartii subs. indologenes pv. setariae pv. nov.	99.802	NCPPB2275-->PANS_07_4
NCPPB2275_02783	P. stewartii subs. indologenes pv. setariae	D-lyxose/D-mannose family sugar isomerase	PANS_07_4_00171	P. stewartii subs. indologenes pv. setariae pv. nov.	100	NCPPB2275-->PANS_07_4
NCPPB2275_02801	P. stewartii subs. indologenes pv. setariae	type VI secretion system tube protein Hcp	PANS_07_10_00639	P. stewartii subs. indologenes pv. setariae pv. nov.	99.793	NCPPB2275-->PANS_07_10
NCPPB2275_02807	P. stewartii subs. indologenes pv. setariae	serine/threonine-protein phosphatase	PANS_07_10_00645	P. stewartii subs. indologenes pv. setariae pv. nov.	99.874	NCPPB2275-->PANS_07_10
NCPPB2275_02818	P. stewartii subs. indologenes pv. setariae	DcrB-related protein	PANS_07_4_00213	P. stewartii subs. indologenes pv. setariae pv. nov.	100	NCPPB2275-->PANS_07_4
NCPPB2275_02893	P. stewartii subs. indologenes pv. setariae	YfdX family protein	PANS_07_10_02753	P. stewartii subs. indologenes pv. setariae pv. nov.	99.85	NCPPB2275-->PANS_07_10
NCPPB2275_02894	P. stewartii subs. indologenes pv. setariae	hypothetical protein	PANS_07_4_01529	P. stewartii subs. indologenes pv. setariae pv. nov.	100	NCPPB2275-->PANS_07_4
NCPPB2275_02905	P. stewartii subs. indologenes pv. setariae	antibiotic biosynthesis monooxygenase	PANS_07_4_01539	P. stewartii subs. indologenes pv. setariae pv. nov.	100	NCPPB2275-->PANS_07_4
NCPPB2275_02906	P. stewartii subs. indologenes pv. setariae	SDR family oxidoreductase	PANS_07_4_01540	P. stewartii subs. indologenes pv. setariae pv. nov.	100	NCPPB2275-->PANS_07_4
NCPPB2275_02908	P. stewartii subs. indologenes pv. setariae	cytochrome ubiquinol oxidase subunit I	PANS_07_4_01542	P. stewartii subs. indologenes pv. setariae pv. nov.	100	NCPPB2275-->PANS_07_4
NCPPB2275_02909	P. stewartii subs. indologenes pv. setariae	cytochrome d ubiquinol oxidase subunit II	PANS_07_4_01543	P. stewartii subs. indologenes pv. setariae pv. nov.	100	NCPPB2275-->PANS_07_4
NCPPB2275_02920	P. stewartii subs. indologenes pv. setariae	oxidative damage protection protein	PANS_07_4_01554	P. stewartii subs. indologenes pv. setariae pv. nov.	100	NCPPB2275-->PANS_07_4
NCPPB2275_02927	P. stewartii subs. indologenes pv. setariae	DUF2884 domain-containing protein	PANS_07_4_01561	P. stewartii subs. indologenes pv. setariae pv. nov.	99.861	NCPPB2275-->PANS_07_4
NCPPB2275_02929	P. stewartii subs. indologenes pv. setariae	PTS mannitol transporter subunit IIB	PANS_07_10_02788	P. stewartii subs. indologenes pv. setariae pv. nov.	100	NCPPB2275-->PANS_07_10
NCPPB2275_02935	P. stewartii subs. indologenes pv. setariae	YggS family pyridoxal phosphate-dependent enzyme	PANS_07_4_01569	P. stewartii subs. indologenes pv. setariae pv. nov.	99.859	NCPPB2275-->PANS_07_4
NCPPB2275_02946	P. stewartii subs. indologenes pv. setariae	biosynthetic arginine decarboxylase	PANS_07_4_01580	P. stewartii subs. indologenes pv. setariae pv. nov.	99.949	NCPPB2275-->PANS_07_4
NCPPB2275_02948	P. stewartii subs. indologenes pv. setariae	M48 family metallopeptidase	PNA_15_2_02455	P. stewartii subs. indologenes pv. setariae pv. nov.	99.868	NCPPB2275-->PNA_15_2
NCPPB2275_02967	P. stewartii subs. indologenes pv. setariae	glycine cleavage system protein GcvH	PANS_07_4_01600	P. stewartii subs. indologenes pv. setariae pv. nov.	100	NCPPB2275-->PANS_07_4
NCPPB2275_02974	P. stewartii subs. indologenes pv. setariae	FAD assembly factor SdhE	PANS_07_4_01607	P. stewartii subs. indologenes pv. setariae pv. nov.	100	NCPPB2275-->PANS_07_4
NCPPB2275_02977	P. stewartii subs. indologenes pv. setariae	bifunctional protein-disulfide isomerase/oxidoreductase DsbC	PANS_07_4_01610	P. stewartii subs. indologenes pv. setariae pv. nov.	99.86	NCPPB2275-->PANS_07_4
NCPPB2275_02979	P. stewartii subs. indologenes pv. setariae	Peptide chain release factor 2	PANS_07_4_01612	P. stewartii subs. indologenes pv. setariae pv. nov.	99.817	NCPPB2275-->PANS_07_4
NCPPB2275_02997	P. stewartii subs. indologenes pv. setariae	prepilin-type N-terminal cleavage/methylation domain-containing protein	PANS_07_10_02855	P. stewartii subs. indologenes pv. setariae pv. nov.	100	NCPPB2275-->PANS_07_10
NCPPB2275_03036	P. stewartii subs. indologenes pv. setariae	6-carboxytetrahydropterin synthase QueD	PANS_07_10_02894	P. stewartii subs. indologenes pv. setariae pv. nov.	100	NCPPB2275-->PANS_07_10
NCPPB2275_03043	P. stewartii subs. indologenes pv. setariae	amino acid ABC transporter permease	PANS_07_4_01676	P. stewartii subs. indologenes pv. setariae pv. nov.	100	NCPPB2275-->PANS_07_4
NCPPB2275_03050	P. stewartii subs. indologenes pv. setariae	uroporphyrinogen-III C-methyltransferase	PNA_14_11_01927	P. stewartii subs. indologenes pv. cepacicola	100	NCPPB2275-->PNA_14_11
NCPPB2275_03059	P. stewartii subs. indologenes pv. setariae	5'/3'-nucleotidase SurE	PANS_07_4_01693	P. stewartii subs. indologenes pv. setariae pv. nov.	100	NCPPB2275-->PANS_07_4
NCPPB2275_03069	P. stewartii subs. indologenes pv. setariae	nicotinamide-nucleotide amidase	PNA_14_11_01908	P. stewartii subs. indologenes pv. cepacicola	100	NCPPB2275-->PNA_14_11
NCPPB2275_03086	P. stewartii subs. indologenes pv. setariae	MULTISPECIES: hypothetical protein	PANS_07_4_01720	P. stewartii subs. indologenes pv. setariae pv. nov.	100	NCPPB2275-->PANS_07_4
NCPPB2275_03731	P. stewartii subs. indologenes pv. setariae	purine-nucleoside phosphorylase	PANS_07_10_02735	P. stewartii subs. indologenes pv. setariae pv. nov.	99.86	NCPPB2275-->PANS_07_10
NCPPB2275_03734	P. stewartii subs. indologenes pv. setariae	deoxyribose-phosphate aldolase	PANS_07_4_01506	P. stewartii subs. indologenes pv. setariae pv. nov.	99.872	NCPPB2275-->PANS_07_4
NCPPB2275_03747	P. stewartii subs. indologenes pv. setariae	ABC transporter substrate-binding protein	PNA_14_11_02116	P. stewartii subs. indologenes pv. cepacicola	100	NCPPB2275-->PNA_14_11
NCPPB2275_03751	P. stewartii subs. indologenes pv. setariae	ABC transporter substrate-binding protein	PNA_14_11_02120	P. stewartii subs. indologenes pv. cepacicola	99.889	NCPPB2275-->PNA_14_11
NCPPB2275_03794	P. stewartii subs. indologenes pv. setariae	PTS fructose transporter subunit IIB	PANS_07_10_02672	P. stewartii subs. indologenes pv. setariae pv. nov.	100	NCPPB2275-->PANS_07_10
NCPPB2275_03795	P. stewartii subs. indologenes pv. setariae	PTS fructose transporter subunit IIC	PANS_07_10_02671	P. stewartii subs. indologenes pv. setariae pv. nov.	100	NCPPB2275-->PANS_07_10
NCPPB2275_03796	P. stewartii subs. indologenes pv. setariae	class II fructose-bisphosphate aldolase family protein	PANS_07_10_02670	P. stewartii subs. indologenes pv. setariae pv. nov.	100	NCPPB2275-->PANS_07_10
NCPPB2275_03797	P. stewartii subs. indologenes pv. setariae	ketose-bisphosphate aldolase	PANS_07_10_02669	P. stewartii subs. indologenes pv. setariae pv. nov.	100	NCPPB2275-->PANS_07_10
NCPPB2275_03799	P. stewartii subs. indologenes pv. setariae	NAD(P)H-dependent oxidoreductase	PANS_07_10_02667	P. stewartii subs. indologenes pv. setariae pv. nov.	100	NCPPB2275-->PANS_07_10
NCPPB2275_03801	P. stewartii subs. indologenes pv. setariae	DNA topoisomerase IV subunit B	PANS_07_10_02665	P. stewartii subs. indologenes pv. setariae pv. nov.	99.947	NCPPB2275-->PANS_07_10
NCPPB2275_03802	P. stewartii subs. indologenes pv. setariae	esterase YqiA	PANS_07_4_01438	P. stewartii subs. indologenes pv. setariae pv. nov.	99.828	NCPPB2275-->PANS_07_4
NCPPB2275_03806	P. stewartii subs. indologenes pv. setariae	outer membrane channel protein TolC	PANS_07_4_01434	P. stewartii subs. indologenes pv. setariae pv. nov.	99.864	NCPPB2275-->PANS_07_4
NCPPB2275_03815	P. stewartii subs. indologenes pv. setariae	SH3 domain-containing protein	PANS_07_4_01425	P. stewartii subs. indologenes pv. setariae pv. nov.	99.839	NCPPB2275-->PANS_07_4
NCPPB2281_00023	P. stewartii subs. indologenes pv. setariae	kinase inhibitor	PANS_07_4_02252	P. stewartii subs. indologenes pv. setariae pv. nov.	100	NCPPB2281-->PANS_07_4
NCPPB2281_00043	P. stewartii subs. indologenes pv. setariae	YbhQ family protein	PANS_07_4_02272	P. stewartii subs. indologenes pv. setariae pv. nov.	100	NCPPB2281-->PANS_07_4
NCPPB2281_00081	P. stewartii subs. indologenes pv. setariae	23S rRNA (adenine(1618)-N(6))-methyltransferase RlmF	PANS_07_4_02310	P. stewartii subs. indologenes pv. setariae pv. nov.	100	NCPPB2281-->PANS_07_4
NCPPB2281_00089	P. stewartii subs. indologenes pv. setariae	manganese-binding transcriptional regulator MntR	PANS_07_4_02318	P. stewartii subs. indologenes pv. setariae pv. nov.	100	NCPPB2281-->PANS_07_4
NCPPB2281_00091	P. stewartii subs. indologenes pv. setariae	HlyD family secretion protein	PANS_07_4_02320	P. stewartii subs. indologenes pv. setariae pv. nov.	99.913	NCPPB2281-->PANS_07_4
NCPPB2281_00117	P. stewartii subs. indologenes pv. setariae	spermidine/putrescine ABC transporter substrate-binding protein PotF	PANS_07_4_02346	P. stewartii subs. indologenes pv. setariae pv. nov.	99.91	NCPPB2281-->PANS_07_4
NCPPB2281_00120	P. stewartii subs. indologenes pv. setariae	putrescine ABC transporter permease PotI	PANS_07_4_02349	P. stewartii subs. indologenes pv. setariae pv. nov.	100	NCPPB2281-->PANS_07_4
NCPPB2281_00136	P. stewartii subs. indologenes pv. setariae	ATP-dependent Clp protease adapter ClpS	PANS_07_4_02365	P. stewartii subs. indologenes pv. setariae pv. nov.	100	NCPPB2281-->PANS_07_4
NCPPB2281_00145	P. stewartii subs. indologenes pv. setariae	outer membrane lipoprotein chaperone LolA	PANS_07_4_02374	P. stewartii subs. indologenes pv. setariae pv. nov.	100	NCPPB2281-->PANS_07_4
NCPPB2281_00151	P. stewartii subs. indologenes pv. setariae	formate transporter FocA	PANS_07_4_02380	P. stewartii subs. indologenes pv. setariae pv. nov.	100	NCPPB2281-->PANS_07_4
NCPPB2281_00156	P. stewartii subs. indologenes pv. setariae	30S ribosomal protein S1	PANS_07_4_02385	P. stewartii subs. indologenes pv. setariae pv. nov.	100	NCPPB2281-->PANS_07_4
NCPPB2281_00190	P. stewartii subs. indologenes pv. setariae	paraquat-inducible protein B	PANS_07_4_02419	P. stewartii subs. indologenes pv. setariae pv. nov.	99.939	NCPPB2281-->PANS_07_4
NCPPB2281_00192	P. stewartii subs. indologenes pv. setariae	bifunctional 3-hydroxydecanoyl-ACP dehydratase/trans-2-decenoyl-ACP isomerase	PANS_07_4_02421	P. stewartii subs. indologenes pv. setariae pv. nov.	100	NCPPB2281-->PANS_07_4
NCPPB2281_01517	P. stewartii subs. indologenes pv. setariae	MULTISPECIES: hypothetical protein	PANS_07_4_04390	P. stewartii subs. indologenes pv. setariae pv. nov.	100	NCPPB2281-->PANS_07_4
NCPPB2281_02359	P. stewartii subs. indologenes pv. setariae	OHCU decarboxylase	NCPPB1562_02736	P. stewartii subs. indologenes pv. setariae	100	NCPPB2281-->NCPPB1562
NCPPB2281_02441	P. stewartii subs. indologenes pv. setariae	TIGR01777 family protein	NCPPB1562_03640	P. stewartii subs. indologenes pv. setariae	99.889	NCPPB2281-->NCPPB1562
NCPPB2281_02725	P. stewartii subs. indologenes pv. setariae	M20 family metallopeptidase	PANS_07_4_03193	P. stewartii subs. indologenes pv. setariae pv. nov.	99.915	NCPPB2281-->PANS_07_4
NCPPB2281_02726	P. stewartii subs. indologenes pv. setariae	ligand-binding protein SH3	PANS_07_4_03194	P. stewartii subs. indologenes pv. setariae pv. nov.	100	NCPPB2281-->PANS_07_4
NCPPB2281_02727	P. stewartii subs. indologenes pv. setariae	LPS export ABC transporter permease LptG	PANS_07_4_03195	P. stewartii subs. indologenes pv. setariae pv. nov.	100	NCPPB2281-->PANS_07_4
NCPPB2281_02728	P. stewartii subs. indologenes pv. setariae	LPS export ABC transporter permease LptF	PANS_07_4_03196	P. stewartii subs. indologenes pv. setariae pv. nov.	100	NCPPB2281-->PANS_07_4
NCPPB2281_02734	P. stewartii subs. indologenes pv. setariae	ribonuclease E inhibitor RraB	PANS_07_4_03203	P. stewartii subs. indologenes pv. setariae pv. nov.	100	NCPPB2281-->PANS_07_4
NCPPB2281_02761	P. stewartii subs. indologenes pv. setariae	tRNA pseudouridine(55) synthase TruB	PANS_07_4_03230	P. stewartii subs. indologenes pv. setariae pv. nov.	100	NCPPB2281-->PANS_07_4
NCPPB2281_02776	P. stewartii subs. indologenes pv. setariae	50S ribosomal protein L21	PANS_07_4_03245	P. stewartii subs. indologenes pv. setariae pv. nov.	100	NCPPB2281-->PANS_07_4
NCPPB2281_02778	P. stewartii subs. indologenes pv. setariae	helix-turn-helix domain-containing protein	PANS_07_4_03247	P. stewartii subs. indologenes pv. setariae pv. nov.	100	NCPPB2281-->PANS_07_4
NCPPB2281_02789	P. stewartii subs. indologenes pv. setariae	LPS export ABC transporter periplasmic protein LptC	PANS_07_4_03258	P. stewartii subs. indologenes pv. setariae pv. nov.	100	NCPPB2281-->PANS_07_4
NCPPB2281_02793	P. stewartii subs. indologenes pv. setariae	ribosome hibernation promoting factor	PANS_07_4_03262	P. stewartii subs. indologenes pv. setariae pv. nov.	100	NCPPB2281-->PANS_07_4
NCPPB2281_02796	P. stewartii subs. indologenes pv. setariae	PTS phosphocarrier protein NPr	PANS_07_4_03265	P. stewartii subs. indologenes pv. setariae pv. nov.	100	NCPPB2281-->PANS_07_4
NCPPB2281_02804	P. stewartii subs. indologenes pv. setariae	50S ribosomal protein L13	PANS_07_4_03273	P. stewartii subs. indologenes pv. setariae pv. nov.	100	NCPPB2281-->PANS_07_4
NCPPB2281_02817	P. stewartii subs. indologenes pv. setariae	co-chaperone GroES	PANS_07_4_03286	P. stewartii subs. indologenes pv. setariae pv. nov.	100	NCPPB2281-->PANS_07_4
NCPPB2281_02818	P. stewartii subs. indologenes pv. setariae	FxsA family protein	PANS_07_4_03287	P. stewartii subs. indologenes pv. setariae pv. nov.	100	NCPPB2281-->PANS_07_4
NCPPB2281_02837	P. stewartii subs. indologenes pv. setariae	carbohydrate porin	PANS_07_4_03399	P. stewartii subs. indologenes pv. setariae pv. nov.	99.924	NCPPB2281-->PANS_07_4
NCPPB2281_02903	P. stewartii subs. indologenes pv. setariae	DUF1471 domain-containing protein	NCPPB1562_03489	P. stewartii subs. indologenes pv. setariae	100	NCPPB2281-->NCPPB1562
NCPPB2281_02918	P. stewartii subs. indologenes pv. setariae	redox-sensitive transcriptional activator SoxR	PANS_07_4_03480	P. stewartii subs. indologenes pv. setariae pv. nov.	100	NCPPB2281-->PANS_07_4
NCPPB2281_02937	P. stewartii subs. indologenes pv. setariae	replicative DNA helicase	PANS_07_4_03499	P. stewartii subs. indologenes pv. setariae pv. nov.	99.929	NCPPB2281-->PANS_07_4
NCPPB2281_02946	P. stewartii subs. indologenes pv. setariae	diacylglycerol kinase	PANS_07_4_03508	P. stewartii subs. indologenes pv. setariae pv. nov.	100	NCPPB2281-->PANS_07_4
NCPPB2282_01320	P. stewartii subs. indologenes pv. setariae	mannosyl-3-phosphoglycerate phosphatase-related protein	PNA_15_2_02013	P. stewartii subs. indologenes pv. setariae pv. nov.	100	PNA_15_2-->NCPPB2282
NCPPB2282_01861	P. stewartii subs. indologenes pv. setariae	DUF1414 domain-containing protein	PNA_14_11_01571	P. stewartii subs. indologenes pv. cepacicola	100	NCPPB2282-->PNA_14_11
NCPPB2282_02189	P. stewartii subs. indologenes pv. setariae	FadR family transcriptional regulator	PANS_07_6_03403	P. stewartii subs. indologenes pv. setariae	100	NCPPB2282-->PANS_07_6
NCPPB2282_02672	P. stewartii subs. indologenes pv. setariae	MULTISPECIES: hypothetical protein	PNA_14_11_02980	P. stewartii subs. indologenes pv. cepacicola	100	NCPPB2282-->PNA_14_11
PANS_07_10_00132	P. stewartii subs. indologenes pv. setariae	type IV pilus biogenesis/stability protein PilW	PANS_07_4_01854	P. stewartii subs. indologenes pv. setariae pv. nov.	100	PANS_07_4-->PANS_07_10
PANS_07_10_00246	P. stewartii subs. indologenes pv. setariae	DUF2502 domain-containing protein	PANS_07_4_01968	P. stewartii subs. indologenes pv. setariae pv. nov.	100	PANS_07_4-->PANS_07_10
PANS_07_10_00627	P. stewartii subs. indologenes pv. setariae	EmmdR/YeeO family multidrug/toxin efflux MATE transporter	PANS_07_4_00178	P. stewartii subs. indologenes pv. setariae pv. nov.	100	PANS_07_4-->PANS_07_10
PANS_07_10_00784	P. stewartii subs. indologenes pv. setariae	lipoprotein	PANS_07_4_02357	P. stewartii subs. indologenes pv. setariae pv. nov.	100	PANS_07_4-->PANS_07_10
PANS_07_10_00842	P. stewartii subs. indologenes pv. setariae	cell division protein ZapC	PANS_07_4_02414	P. stewartii subs. indologenes pv. setariae pv. nov.	100	PANS_07_4-->PANS_07_10
PANS_07_10_00868	P. stewartii subs. indologenes pv. setariae	YccJ family protein	PANS_07_4_02440	P. stewartii subs. indologenes pv. setariae pv. nov.	100	PANS_07_4-->PANS_07_10
PANS_07_10_01137	P. stewartii subs. indologenes pv. setariae	stress-induced protein YchH	PANS_07_4_00947	P. stewartii subs. indologenes pv. setariae pv. nov.	100	PANS_07_4-->PANS_07_10
PANS_07_10_01245	P. stewartii subs. indologenes pv. setariae	DUF1656 domain-containing protein	PANS_07_4_00841	P. stewartii subs. indologenes pv. setariae pv. nov.	100	PANS_07_4-->PANS_07_10
PANS_07_10_02150	P. stewartii subs. indologenes pv. setariae	anaerobic ribonucleoside-triphosphate reductase-activating protein	PANS_07_4_03216	P. stewartii subs. indologenes pv. setariae pv. nov.	100	PANS_07_4-->PANS_07_10
PANS_07_12_00117	P. stewartii subs. indologenes pv. setariae	EmmdR/YeeO family multidrug/toxin efflux MATE transporter	PANS_07_4_00178	P. stewartii subs. indologenes pv. setariae pv. nov.	100	PANS_07_4-->PANS_07_12
PANS_07_12_00378	P. stewartii subs. indologenes pv. setariae	5'-deoxynucleotidase	PANS_07_4_02141	P. stewartii subs. indologenes pv. setariae pv. nov.	100	PANS_07_12-->PANS_07_4
PANS_07_12_00463	P. stewartii subs. indologenes pv. setariae	Uncharacterised protein	PANS_07_4_02003	P. stewartii subs. indologenes pv. setariae pv. nov.	100	PANS_07_12-->PANS_07_4
PANS_07_12_00612	P. stewartii subs. indologenes pv. setariae	type IV pilus biogenesis/stability protein PilW	PANS_07_4_01854	P. stewartii subs. indologenes pv. setariae pv. nov.	100	PANS_07_4-->PANS_07_12
PANS_07_12_00720	P. stewartii subs. indologenes pv. setariae	spermidine N1-acetyltransferase	PANS_07_4_01753	P. stewartii subs. indologenes pv. setariae pv. nov.	100	PANS_07_12-->PANS_07_4
PANS_07_12_01058	P. stewartii subs. indologenes pv. setariae	cytochrome ubiquinol oxidase subunit I	PANS_99_15_00770	P. stewartii subs. indologenes pv. setariae pv. nov.	100	PANS_07_12-->PANS_99_15
PANS_07_12_01070	P. stewartii subs. indologenes pv. setariae	epoxide hydrolase	PANS_99_15_00758	P. stewartii subs. indologenes pv. setariae pv. nov.	100	PANS_07_12-->PANS_99_15
PANS_07_12_01072	P. stewartii subs. indologenes pv. setariae	hypothetical protein C7433_101744	PANS_99_15_00756	P. stewartii subs. indologenes pv. setariae pv. nov.	100	PANS_07_12-->PANS_99_15
PANS_07_12_01089	P. stewartii subs. indologenes pv. setariae	diguanylate cyclase	PANS_99_15_00739	P. stewartii subs. indologenes pv. setariae pv. nov.	100	PANS_07_12-->PANS_99_15
PANS_07_12_01137	P. stewartii subs. indologenes pv. setariae	stress-induced protein YchH	PANS_07_4_00947	P. stewartii subs. indologenes pv. setariae pv. nov.	100	PANS_07_4-->PANS_07_12
PANS_07_12_01851	P. stewartii subs. indologenes pv. setariae	3-hydroxy-fatty acyl-ACP dehydratase	PNA_15_2_03138	P. stewartii subs. indologenes pv. setariae pv. nov.	100	PANS_07_12-->PNA_15_2
PANS_07_12_01862	P. stewartii subs. indologenes pv. setariae	acyl carrier protein	PNA_15_2_03149	P. stewartii subs. indologenes pv. setariae pv. nov.	100	PANS_07_12-->PNA_15_2
PANS_07_12_02071	P. stewartii subs. indologenes pv. setariae	DUF1493 family protein	PNA_03_3_03282	P. stewartii subs. indologenes pv. cepacicola pv. nov.	100	PANS_07_12-->PNA_03_3
PANS_07_12_02286	P. stewartii subs. indologenes pv. setariae	helix-turn-helix transcriptional regulator	PANS_99_15_04152	P. stewartii subs. indologenes pv. setariae pv. nov.	100	PANS_99_15-->PANS_07_12
PANS_07_14_00490	P. stewartii subs. indologenes pv. setariae	ABC transporter substrate-binding protein	PNA_14_11_00061	P. stewartii subs. indologenes pv. cepacicola	100	PANS_07_14-->PNA_14_11
PANS_07_14_00518	P. stewartii subs. indologenes pv. setariae	manganese-binding transcriptional regulator MntR	PNA_14_11_00089	P. stewartii subs. indologenes pv. cepacicola	100	PANS_07_14-->PNA_14_11
PANS_07_14_00621	P. stewartii subs. indologenes pv. setariae	membrane integrity-associated transporter subunit PqiC	PNA_14_11_00191	P. stewartii subs. indologenes pv. cepacicola	100	PANS_07_14-->PNA_14_11
PANS_07_14_01772	P. stewartii subs. indologenes pv. setariae	acyl carrier protein	PNA_15_2_03149	P. stewartii subs. indologenes pv. setariae pv. nov.	100	PANS_07_14-->PNA_15_2
PANS_07_14_01798	P. stewartii subs. indologenes pv. setariae	5-dehydro-4-deoxy-D-glucuronate isomerase	LMG2632_03032	P. stewartii subs. indologenes pv. setariae pv. nov.	100	PANS_07_14-->LMG2632
PANS_07_14_02447	P. stewartii subs. indologenes pv. setariae	MFS transporter	PNA_15_2_02540	P. stewartii subs. indologenes pv. setariae pv. nov.	99.924	PNA_15_2-->PANS_07_14
PANS_07_14_02474	P. stewartii subs. indologenes pv. setariae	PAS domain-containing methyl-accepting chemotaxis protein	PNA_15_2_02512	P. stewartii subs. indologenes pv. setariae pv. nov.	99.922	PANS_07_14-->PNA_15_2
PANS_07_4_00194	P. stewartii subs. indologenes pv. setariae	MULTISPECIES: hypothetical protein	PNA_03_3_01342	P. stewartii subs. indologenes pv. cepacicola pv. nov.	100	PANS_07_4-->PNA_03_3
PANS_99_15_00020	P. stewartii subs. indologenes pv. setariae	RNA polymerase sigma factor FliA	PANS_07_10_00723	P. stewartii subs. indologenes pv. setariae pv. nov.	100	PANS_07_10-->PANS_99_15
PANS_99_15_00021	P. stewartii subs. indologenes pv. setariae	flagella biosynthesis regulatory protein FliZ	PANS_07_10_00724	P. stewartii subs. indologenes pv. setariae pv. nov.	100	PANS_99_15-->PANS_07_10
PANS_99_15_00029	P. stewartii subs. indologenes pv. setariae	sodium/proline symporter PutP	PANS_07_10_00732	P. stewartii subs. indologenes pv. setariae pv. nov.	100	PANS_07_10-->PANS_99_15
PANS_99_15_00638	P. stewartii subs. indologenes pv. setariae	hexitol phosphatase HxpB	PANS_07_10_01190	P. stewartii subs. indologenes pv. setariae pv. nov.	99.851	PANS_07_10-->PANS_99_15
PANS_99_15_00737	P. stewartii subs. indologenes pv. setariae	MCP four helix bundle domain-containing protein	PANS_07_10_01091	P. stewartii subs. indologenes pv. setariae pv. nov.	100	PANS_07_10-->PANS_99_15
PANS_99_15_00796	P. stewartii subs. indologenes pv. setariae	ABC transporter ATP-binding protein	PANS_07_14_00798	P. stewartii subs. indologenes pv. setariae pv. nov.	100	PANS_99_15-->PANS_07_14
PANS_99_15_00798	P. stewartii subs. indologenes pv. setariae	DUF1611 domain-containing protein	PANS_07_14_00796	P. stewartii subs. indologenes pv. setariae pv. nov.	100	PANS_99_15-->PANS_07_14
PANS_99_15_00955	P. stewartii subs. indologenes pv. setariae	chemotaxis protein	PANS_07_10_04327	P. stewartii subs. indologenes pv. setariae pv. nov.	100	PANS_99_15-->PANS_07_10
PANS_99_15_00969	P. stewartii subs. indologenes pv. setariae	baseplate assembly protein	PANS_07_10_04341	P. stewartii subs. indologenes pv. setariae pv. nov.	100	PANS_99_15-->PANS_07_10
PANS_99_15_01370	P. stewartii subs. indologenes pv. setariae	GNAT family N-acetyltransferase	PANS_07_4_02297	P. stewartii subs. indologenes pv. setariae pv. nov.	100	PANS_99_15-->PANS_07_4
PANS_99_15_01514	P. stewartii subs. indologenes pv. setariae	succinate-semialdehyde dehydrogenase	PANS_07_4_02439	P. stewartii subs. indologenes pv. setariae pv. nov.	99.854	PANS_07_4-->PANS_99_15
PANS_99_15_01595	P. stewartii subs. indologenes pv. setariae	metal-dependent hydrolase	PANS_07_4_01119	P. stewartii subs. indologenes pv. setariae pv. nov.	99.874	PANS_99_15-->PANS_07_4
PANS_99_15_03146	P. stewartii subs. indologenes pv. setariae	acyl carrier protein	PNA_15_2_03149	P. stewartii subs. indologenes pv. setariae pv. nov.	100	PNA_15_2-->PANS_99_15
PANS_99_15_03212	P. stewartii subs. indologenes pv. setariae	GNAT family N-acetyltransferase	PANS_07_14_01697	P. stewartii subs. indologenes pv. setariae pv. nov.	99.799	PANS_07_14-->PANS_99_15
PANS_99_15_03218	P. stewartii subs. indologenes pv. setariae	2-iminobutanoate/2-iminopropanoate deaminase	PNA_14_11_03234	P. stewartii subs. indologenes pv. cepacicola	100	PNA_14_11-->PANS_99_15
PANS_99_15_03254	P. stewartii subs. indologenes pv. setariae	Obg family GTPase CgtA	PANS_07_4_03243	P. stewartii subs. indologenes pv. setariae pv. nov.	100	PANS_99_15-->PANS_07_4
PANS_99_15_03275	P. stewartii subs. indologenes pv. setariae	RNase adapter RapZ	PNA_14_11_03291	P. stewartii subs. indologenes pv. cepacicola	99.883	PANS_99_15-->PNA_14_11
PANS_99_15_03276	P. stewartii subs. indologenes pv. setariae	PTS phosphocarrier protein NPr	PNA_14_11_03292	P. stewartii subs. indologenes pv. cepacicola	100	PANS_99_15-->PNA_14_11
PANS_99_15_04017	P. stewartii subs. indologenes pv. setariae	HAMP domain-containing histidine kinase	PNA_15_2_01945	P. stewartii subs. indologenes pv. setariae pv. nov.	100	PANS_99_15-->PNA_15_2
PANS_99_15_04022	P. stewartii subs. indologenes pv. setariae	hydroxyacid dehydrogenase	PANS_07_10_00043	P. stewartii subs. indologenes pv. setariae pv. nov.	99.896	PANS_99_15-->PANS_07_10
PANS_99_15_04030	P. stewartii subs. indologenes pv. setariae	ATP-dependent Clp protease proteolytic subunit	LMG2632_01479	P. stewartii subs. indologenes pv. setariae pv. nov.	99.85	PANS_99_15-->LMG2632
PANS_99_15_04153	P. stewartii subs. indologenes pv. setariae	SDR family oxidoreductase	PANS_07_14_00850	P. stewartii subs. indologenes pv. setariae pv. nov.	100	PANS_07_14-->PANS_99_15
PNA_03_3_00024	P. stewartii subs. indologenes pv. cepacicola	molecular chaperone	PANS_07_4_03029	P. stewartii subs. indologenes pv. setariae pv. nov.	100	PNA_03_3-->PANS_07_4
PNA_03_3_00029	P. stewartii subs. indologenes pv. cepacicola	fimbrial protein	PANS_07_4_03034	P. stewartii subs. indologenes pv. setariae pv. nov.	99.883	PNA_03_3-->PANS_07_4
PNA_03_3_00048	P. stewartii subs. indologenes pv. cepacicola	ABC transporter substrate-binding protein	PANS_07_4_03053	P. stewartii subs. indologenes pv. setariae pv. nov.	99.909	PNA_03_3-->PANS_07_4
PNA_03_3_00055	P. stewartii subs. indologenes pv. cepacicola	cold-shock protein	PANS_07_4_03061	P. stewartii subs. indologenes pv. setariae pv. nov.	100	PNA_03_3-->PANS_07_4
PNA_03_3_00062	P. stewartii subs. indologenes pv. cepacicola	D-alanyl-D-alanine carboxypeptidase (penicillin-binding protein 5/6)	PANS_07_4_03068	P. stewartii subs. indologenes pv. setariae pv. nov.	99.838	PNA_03_3-->PANS_07_4
PNA_03_3_00066	P. stewartii subs. indologenes pv. cepacicola	23S rRNA (pseudouridine(1915)-N(3))-methyltransferase RlmH	PANS_07_4_03072	P. stewartii subs. indologenes pv. setariae pv. nov.	100	PNA_03_3-->PANS_07_4
PNA_03_3_00067	P. stewartii subs. indologenes pv. cepacicola	ribosome silencing factor	PANS_07_4_03073	P. stewartii subs. indologenes pv. setariae pv. nov.	100	PNA_03_3-->PANS_07_4
PNA_03_3_00095	P. stewartii subs. indologenes pv. cepacicola	replication initiation negative regulator SeqA	PANS_07_4_02193	P. stewartii subs. indologenes pv. setariae pv. nov.	100	PNA_03_3-->PANS_07_4
PNA_03_3_00099	P. stewartii subs. indologenes pv. cepacicola	carboxymuconolactone decarboxylase family protein	PANS_07_4_02197	P. stewartii subs. indologenes pv. setariae pv. nov.	100	PNA_03_3-->PANS_07_4
PNA_03_3_00111	P. stewartii subs. indologenes pv. cepacicola	GNAT family N-acetyltransferase	PNA_14_11_03131	P. stewartii subs. indologenes pv. cepacicola	99.83	PNA_03_3-->PNA_14_11
PNA_03_3_00112	P. stewartii subs. indologenes pv. cepacicola	citrate synthase	PNA_14_11_03132	P. stewartii subs. indologenes pv. cepacicola	99.844	PNA_03_3-->PNA_14_11
PNA_03_3_00114	P. stewartii subs. indologenes pv. cepacicola	succinate dehydrogenase membrane anchor subunit	PANS_07_4_02212	P. stewartii subs. indologenes pv. setariae pv. nov.	100	PNA_03_3-->PANS_07_4
PNA_03_3_00115	P. stewartii subs. indologenes pv. cepacicola	succinate dehydrogenase flavoprotein subunit	PANS_07_4_02213	P. stewartii subs. indologenes pv. setariae pv. nov.	100	PNA_03_3-->PANS_07_4
PNA_03_3_00116	P. stewartii subs. indologenes pv. cepacicola	succinate dehydrogenase iron-sulfur subunit	PANS_07_4_02214	P. stewartii subs. indologenes pv. setariae pv. nov.	99.861	PNA_03_3-->PANS_07_4
PNA_03_3_00124	P. stewartii subs. indologenes pv. cepacicola	cyd operon protein YbgE	PANS_07_4_02222	P. stewartii subs. indologenes pv. setariae pv. nov.	100	PNA_03_3-->PANS_07_4
PNA_03_3_00125	P. stewartii subs. indologenes pv. cepacicola	tol-pal system-associated acyl-CoA thioesterase	PANS_07_4_02223	P. stewartii subs. indologenes pv. setariae pv. nov.	100	PNA_03_3-->PANS_07_4
PNA_03_3_00130	P. stewartii subs. indologenes pv. cepacicola	peptidoglycan-associated lipoprotein Pal	PANS_07_4_02228	P. stewartii subs. indologenes pv. setariae pv. nov.	100	PANS_07_4-->PNA_03_3
PNA_03_3_00134	P. stewartii subs. indologenes pv. cepacicola	methylated-DNA--[protein]-cysteine S-methyltransferase	PANS_07_4_02232	P. stewartii subs. indologenes pv. setariae pv. nov.	100	PNA_03_3-->PANS_07_4
PNA_03_3_00165	P. stewartii subs. indologenes pv. cepacicola	cyclic pyranopterin monophosphate synthase MoaC	PANS_07_4_02263	P. stewartii subs. indologenes pv. setariae pv. nov.	100	PNA_03_3-->PANS_07_4
PNA_03_3_00166	P. stewartii subs. indologenes pv. cepacicola	molybdopterin synthase sulfur carrier subunit	PANS_07_4_02264	P. stewartii subs. indologenes pv. setariae pv. nov.	100	PNA_03_3-->PANS_07_4
PNA_03_3_00167	P. stewartii subs. indologenes pv. cepacicola	molybdopterin synthase catalytic subunit MoaE	PANS_07_4_02265	P. stewartii subs. indologenes pv. setariae pv. nov.	100	PNA_03_3-->PANS_07_4
PNA_03_3_00174	P. stewartii subs. indologenes pv. cepacicola	YbhQ family protein	PANS_07_4_02272	P. stewartii subs. indologenes pv. setariae pv. nov.	100	PNA_03_3-->PANS_07_4
PNA_03_3_00183	P. stewartii subs. indologenes pv. cepacicola	DedA family protein	PANS_07_4_02281	P. stewartii subs. indologenes pv. setariae pv. nov.	99.827	PNA_03_3-->PANS_07_4
PNA_03_3_00191	P. stewartii subs. indologenes pv. cepacicola	isopentenyl-diphosphate delta-isomerase	PANS_07_4_02289	P. stewartii subs. indologenes pv. setariae pv. nov.	100	PNA_03_3-->PANS_07_4
PNA_03_3_00192	P. stewartii subs. indologenes pv. cepacicola	ABC transporter substrate-binding protein	PANS_07_4_02290	P. stewartii subs. indologenes pv. setariae pv. nov.	100	PNA_03_3-->PANS_07_4
PNA_03_3_00247	P. stewartii subs. indologenes pv. cepacicola	YbjN domain-containing protein	PANS_07_4_02345	P. stewartii subs. indologenes pv. setariae pv. nov.	100	PNA_03_3-->PANS_07_4
PNA_03_3_00250	P. stewartii subs. indologenes pv. cepacicola	putrescine ABC transporter permease PotH	PANS_07_4_02348	P. stewartii subs. indologenes pv. setariae pv. nov.	99.896	PNA_03_3-->PANS_07_4
PNA_03_3_00258	P. stewartii subs. indologenes pv. cepacicola	arginine ABC transporter ATP-binding protein ArtP	PANS_07_4_02356	P. stewartii subs. indologenes pv. setariae pv. nov.	100	PNA_03_3-->PANS_07_4
PNA_03_3_00259	P. stewartii subs. indologenes pv. cepacicola	lipoprotein	PANS_07_4_02357	P. stewartii subs. indologenes pv. setariae pv. nov.	100	PNA_03_3-->PANS_07_4
PNA_03_3_00261	P. stewartii subs. indologenes pv. cepacicola	N-acetylmuramoyl-L-alanine amidase	PANS_07_4_02359	P. stewartii subs. indologenes pv. setariae pv. nov.	100	PNA_03_3-->PANS_07_4
PNA_03_3_00266	P. stewartii subs. indologenes pv. cepacicola	Cold shock-like protein CspD	PANS_07_4_02364	P. stewartii subs. indologenes pv. setariae pv. nov.	100	PNA_03_3-->PANS_07_4
PNA_03_3_00267	P. stewartii subs. indologenes pv. cepacicola	ATP-dependent Clp protease adapter ClpS	PANS_07_4_02365	P. stewartii subs. indologenes pv. setariae pv. nov.	100	PNA_03_3-->PANS_07_4
PNA_03_3_00269	P. stewartii subs. indologenes pv. cepacicola	translation initiation factor IF-1	PANS_07_4_02367	P. stewartii subs. indologenes pv. setariae pv. nov.	100	PNA_03_3-->PANS_07_4
PNA_03_3_00274	P. stewartii subs. indologenes pv. cepacicola	leucine-responsive transcriptional regulator Lrp	PANS_07_4_02372	P. stewartii subs. indologenes pv. setariae pv. nov.	100	PNA_03_3-->PANS_07_4
PNA_03_3_00276	P. stewartii subs. indologenes pv. cepacicola	outer membrane lipoprotein chaperone LolA	PANS_07_4_02374	P. stewartii subs. indologenes pv. setariae pv. nov.	99.837	PNA_03_3-->PANS_07_4
PNA_03_3_00287	P. stewartii subs. indologenes pv. cepacicola	30S ribosomal protein S1	PANS_07_4_02385	P. stewartii subs. indologenes pv. setariae pv. nov.	99.883	PNA_03_3-->PANS_07_4
PNA_03_3_00288	P. stewartii subs. indologenes pv. cepacicola	integration host factor subunit beta	PANS_07_4_02386	P. stewartii subs. indologenes pv. setariae pv. nov.	100	PNA_03_3-->PANS_07_4
PNA_03_3_00323	P. stewartii subs. indologenes pv. cepacicola	bifunctional 3-hydroxydecanoyl-ACP dehydratase/trans-2-decenoyl-ACP isomerase	PANS_07_4_02421	P. stewartii subs. indologenes pv. setariae pv. nov.	99.807	PNA_03_3-->PANS_07_4
PNA_03_3_00351	P. stewartii subs. indologenes pv. cepacicola	autoinducer synthase	PANS_07_4_02448	P. stewartii subs. indologenes pv. setariae pv. nov.	100	PNA_03_3-->PANS_07_4
PNA_03_3_00948	P. stewartii subs. indologenes pv. cepacicola	glycosyl transferase	PANS_07_6_00275	P. stewartii subs. indologenes pv. setariae	100	PANS_07_6-->PNA_03_3
PNA_03_3_01147	P. stewartii subs. indologenes pv. cepacicola	carboxy terminal-processing peptidase	PANS_07_6_00474	P. stewartii subs. indologenes pv. setariae	99.804	PNA_03_3-->PANS_07_6
PNA_03_3_01323	P. stewartii subs. indologenes pv. cepacicola	DcrB-related protein	PANS_07_4_00213	P. stewartii subs. indologenes pv. setariae pv. nov.	100	PANS_07_4-->PNA_03_3
PNA_03_3_01386	P. stewartii subs. indologenes pv. cepacicola	Lrp/AsnC family transcriptional regulator	PANS_07_4_00150	P. stewartii subs. indologenes pv. setariae pv. nov.	100	PNA_03_3-->PANS_07_4
PNA_03_3_01420	P. stewartii subs. indologenes pv. cepacicola	sarcosine oxidase subunit gamma	PANS_07_4_00117	P. stewartii subs. indologenes pv. setariae pv. nov.	99.852	PNA_03_3-->PANS_07_4
PNA_03_3_01463	P. stewartii subs. indologenes pv. cepacicola	DeoR/GlpR transcriptional regulator	PANS_07_4_00081	P. stewartii subs. indologenes pv. setariae pv. nov.	99.87	PNA_03_3-->PANS_07_4
PNA_03_3_01485	P. stewartii subs. indologenes pv. cepacicola	glycosyltransferase	PANS_07_4_00059	P. stewartii subs. indologenes pv. setariae pv. nov.	99.866	PNA_03_3-->PANS_07_4
PNA_03_3_01508	P. stewartii subs. indologenes pv. cepacicola	EpsG family protein	PANS_07_4_00036	P. stewartii subs. indologenes pv. setariae pv. nov.	99.912	PNA_03_3-->PANS_07_4
PNA_03_3_01510	P. stewartii subs. indologenes pv. cepacicola	protein tyrosine phosphatase	PANS_07_4_00034	P. stewartii subs. indologenes pv. setariae pv. nov.	100	PNA_03_3-->PANS_07_4
PNA_03_3_01525	P. stewartii subs. indologenes pv. cepacicola	two-component system response regulator BaeR	PANS_07_4_00019	P. stewartii subs. indologenes pv. setariae pv. nov.	99.859	PNA_03_3-->PANS_07_4
PNA_03_3_01542	P. stewartii subs. indologenes pv. cepacicola	NAD-dependent malic enzyme	PANS_07_4_00002	P. stewartii subs. indologenes pv. setariae pv. nov.	99.823	PNA_03_3-->PANS_07_4
PNA_03_3_01609	P. stewartii subs. indologenes pv. cepacicola	stress response protein ElaB	PANS_07_4_02161	P. stewartii subs. indologenes pv. setariae pv. nov.	100	PNA_03_3-->PANS_07_4
PNA_03_3_01618	P. stewartii subs. indologenes pv. cepacicola	NADH-quinone oxidoreductase subunit NuoI	PANS_07_4_02152	P. stewartii subs. indologenes pv. setariae pv. nov.	100	PNA_03_3-->PANS_07_4
PNA_03_3_01624	P. stewartii subs. indologenes pv. cepacicola	NADH-quinone oxidoreductase subunit B	PANS_07_4_02146	P. stewartii subs. indologenes pv. setariae pv. nov.	99.853	PNA_03_3-->PANS_07_4
PNA_03_3_01629	P. stewartii subs. indologenes pv. cepacicola	5'-deoxynucleotidase	PANS_07_4_02141	P. stewartii subs. indologenes pv. setariae pv. nov.	99.833	PNA_03_3-->PANS_07_4
PNA_03_3_01641	P. stewartii subs. indologenes pv. cepacicola	NUDIX hydrolase YfcD	PANS_07_4_02129	P. stewartii subs. indologenes pv. setariae pv. nov.	99.81	PNA_03_3-->PANS_07_4
PNA_03_3_01652	P. stewartii subs. indologenes pv. cepacicola	UbiX family flavin prenyltransferase	PANS_07_4_02118	P. stewartii subs. indologenes pv. setariae pv. nov.	99.825	PNA_03_3-->PANS_07_4
PNA_03_3_01655	P. stewartii subs. indologenes pv. cepacicola	cell division protein DedD	PNA_15_2_01642	P. stewartii subs. indologenes pv. setariae pv. nov.	100	PNA_03_3-->PNA_15_2
PNA_03_3_01664	P. stewartii subs. indologenes pv. cepacicola	transcriptional regulator TctD	PANS_07_4_02106	P. stewartii subs. indologenes pv. setariae pv. nov.	99.851	PNA_03_3-->PANS_07_4
PNA_03_3_01678	P. stewartii subs. indologenes pv. cepacicola	50S ribosomal protein L3 N(5)-glutamine methyltransferase	PANS_07_4_02092	P. stewartii subs. indologenes pv. setariae pv. nov.	99.893	PNA_03_3-->PANS_07_4
PNA_03_3_01680	P. stewartii subs. indologenes pv. cepacicola	HAMP domain-containing protein	PANS_07_4_02090	P. stewartii subs. indologenes pv. setariae pv. nov.	99.89	PNA_03_3-->PANS_07_4
PNA_03_3_01683	P. stewartii subs. indologenes pv. cepacicola	acetyl-CoA C-acyltransferase FadI	PANS_07_4_02087	P. stewartii subs. indologenes pv. setariae pv. nov.	99.847	PNA_03_3-->PANS_07_4
PNA_03_3_01684	P. stewartii subs. indologenes pv. cepacicola	YfcZ/YiiS family protein	PANS_07_4_02086	P. stewartii subs. indologenes pv. setariae pv. nov.	100	PNA_03_3-->PANS_07_4
PNA_03_3_01686	P. stewartii subs. indologenes pv. cepacicola	phospholipid-binding lipoprotein MlaA	PANS_07_4_02084	P. stewartii subs. indologenes pv. setariae pv. nov.	100	PNA_03_3-->PANS_07_4
PNA_03_3_01726	P. stewartii subs. indologenes pv. cepacicola	sugar ABC transporter permease	PANS_07_4_01992	P. stewartii subs. indologenes pv. setariae pv. nov.	100	PNA_03_3-->PANS_07_4
PNA_03_3_01732	P. stewartii subs. indologenes pv. cepacicola	hypothetical protein C7433_103203	PANS_07_4_01986	P. stewartii subs. indologenes pv. setariae pv. nov.	100	PNA_03_3-->PANS_07_4
PNA_03_3_01733	P. stewartii subs. indologenes pv. cepacicola	DUF2767 family protein	PANS_07_4_01985	P. stewartii subs. indologenes pv. setariae pv. nov.	100	PNA_03_3-->PANS_07_4
PNA_03_3_01737	P. stewartii subs. indologenes pv. cepacicola	membrane lipoprotein lipid attachment site-containing protein	PANS_07_4_01981	P. stewartii subs. indologenes pv. setariae pv. nov.	100	PNA_03_3-->PANS_07_4
PNA_03_3_01747	P. stewartii subs. indologenes pv. cepacicola	glucokinase	PANS_07_4_01971	P. stewartii subs. indologenes pv. setariae pv. nov.	99.896	PNA_03_3-->PANS_07_4
PNA_03_3_01752	P. stewartii subs. indologenes pv. cepacicola	Nramp family divalent metal transporter	PANS_07_4_01966	P. stewartii subs. indologenes pv. setariae pv. nov.	99.839	PNA_03_3-->PANS_07_4
PNA_03_3_01759	P. stewartii subs. indologenes pv. cepacicola	formate/nitrite transporter family protein	PANS_07_4_01958	P. stewartii subs. indologenes pv. setariae pv. nov.	99.873	PNA_03_3-->PANS_07_4
PNA_03_3_01770	P. stewartii subs. indologenes pv. cepacicola	phosphocarrier protein Hpr	PANS_07_4_01947	P. stewartii subs. indologenes pv. setariae pv. nov.	100	PNA_03_3-->PANS_07_4
PNA_03_3_01772	P. stewartii subs. indologenes pv. cepacicola	PTS glucose transporter subunit IIA	PANS_07_4_01945	P. stewartii subs. indologenes pv. setariae pv. nov.	100	PNA_03_3-->PANS_07_4
PNA_03_3_01797	P. stewartii subs. indologenes pv. cepacicola	ABC transporter permease	PANS_07_4_01921	P. stewartii subs. indologenes pv. setariae pv. nov.	100	PNA_03_3-->PANS_07_4
PNA_03_3_01809	P. stewartii subs. indologenes pv. cepacicola	ArsC family reductase	PANS_07_4_01909	P. stewartii subs. indologenes pv. setariae pv. nov.	100	PNA_03_3-->PANS_07_4
PNA_03_3_01818	P. stewartii subs. indologenes pv. cepacicola	glycine cleavage system transcriptional repressor	PANS_07_4_01900	P. stewartii subs. indologenes pv. setariae pv. nov.	100	PNA_03_3-->PANS_07_4
PNA_03_3_01819	P. stewartii subs. indologenes pv. cepacicola	thioredoxin-dependent thiol peroxidase	PANS_07_4_01899	P. stewartii subs. indologenes pv. setariae pv. nov.	100	PNA_03_3-->PANS_07_4
PNA_03_3_01852	P. stewartii subs. indologenes pv. cepacicola	glutamine-hydrolyzing GMP synthase	PANS_07_4_01867	P. stewartii subs. indologenes pv. setariae pv. nov.	99.81	PNA_03_3-->PANS_07_4
PNA_03_3_01853	P. stewartii subs. indologenes pv. cepacicola	IMP dehydrogenase	PANS_07_4_01866	P. stewartii subs. indologenes pv. setariae pv. nov.	99.932	PNA_03_3-->PANS_07_4
PNA_03_3_01865	P. stewartii subs. indologenes pv. cepacicola	type IV pilus biogenesis/stability protein PilW	PANS_07_4_01854	P. stewartii subs. indologenes pv. setariae pv. nov.	100	PNA_03_3-->PANS_07_4
PNA_03_3_01867	P. stewartii subs. indologenes pv. cepacicola	nucleoside-diphosphate kinase	PANS_07_4_01852	P. stewartii subs. indologenes pv. setariae pv. nov.	100	PNA_03_3-->PANS_07_4
PNA_03_3_01873	P. stewartii subs. indologenes pv. cepacicola	IscS subfamily cysteine desulfurase	PANS_07_4_01846	P. stewartii subs. indologenes pv. setariae pv. nov.	99.828	PNA_03_3-->PANS_07_4
PNA_03_3_01874	P. stewartii subs. indologenes pv. cepacicola	Fe-S cluster assembly transcriptional regulator IscR	PANS_07_4_01845	P. stewartii subs. indologenes pv. setariae pv. nov.	100	PNA_03_3-->PANS_07_4
PNA_03_3_01876	P. stewartii subs. indologenes pv. cepacicola	inositol-1-monophosphatase	PANS_07_4_01843	P. stewartii subs. indologenes pv. setariae pv. nov.	100	PNA_03_3-->PANS_07_4
PNA_03_3_01895	P. stewartii subs. indologenes pv. cepacicola	tRNA adenosine(34) deaminase TadA	PANS_07_4_01828	P. stewartii subs. indologenes pv. setariae pv. nov.	100	PNA_03_3-->PANS_07_4
PNA_03_3_01906	P. stewartii subs. indologenes pv. cepacicola	elongation factor 4	PANS_07_4_01817	P. stewartii subs. indologenes pv. setariae pv. nov.	99.889	PNA_03_3-->PANS_07_4
PNA_03_3_03113	P. stewartii subs. indologenes pv. cepacicola	YitT family protein	PANS_07_14_01387	P. stewartii subs. indologenes pv. setariae pv. nov.	100	PANS_07_14-->PNA_03_3
PNA_03_3_03125	P. stewartii subs. indologenes pv. cepacicola	polysaccharide biosynthesis protein	PANS_07_10_01859	P. stewartii subs. indologenes pv. setariae pv. nov.	99.841	PANS_07_10-->PNA_03_3
PNA_03_3_03343	P. stewartii subs. indologenes pv. cepacicola	FxsA family protein	PANS_07_4_03287	P. stewartii subs. indologenes pv. setariae pv. nov.	100	PNA_03_3-->PANS_07_4
PNA_03_3_03348	P. stewartii subs. indologenes pv. cepacicola	elongation factor P	PANS_07_4_03282	P. stewartii subs. indologenes pv. setariae pv. nov.	100	PNA_03_3-->PANS_07_4
PNA_03_3_03357	P. stewartii subs. indologenes pv. cepacicola	50S ribosomal protein L13	PANS_07_4_03273	P. stewartii subs. indologenes pv. setariae pv. nov.	100	PNA_03_3-->PANS_07_4
PNA_03_3_03359	P. stewartii subs. indologenes pv. cepacicola	stringent starvation protein A	PANS_07_4_03271	P. stewartii subs. indologenes pv. setariae pv. nov.	100	PNA_03_3-->PANS_07_4
PNA_03_3_03368	P. stewartii subs. indologenes pv. cepacicola	ribosome hibernation promoting factor	PANS_07_4_03262	P. stewartii subs. indologenes pv. setariae pv. nov.	100	PNA_03_3-->PANS_07_4
PNA_03_3_03370	P. stewartii subs. indologenes pv. cepacicola	LPS export ABC transporter ATP-binding protein	PANS_07_4_03260	P. stewartii subs. indologenes pv. setariae pv. nov.	100	PNA_03_3-->PANS_07_4
PNA_03_3_03371	P. stewartii subs. indologenes pv. cepacicola	lipopolysaccharide ABC transporter substrate-binding protein LptA	PANS_07_4_03259	P. stewartii subs. indologenes pv. setariae pv. nov.	100	PNA_03_3-->PANS_07_4
PNA_03_3_03372	P. stewartii subs. indologenes pv. cepacicola	LPS export ABC transporter periplasmic protein LptC	PANS_07_4_03258	P. stewartii subs. indologenes pv. setariae pv. nov.	100	PNA_03_3-->PANS_07_4
PNA_03_3_03375	P. stewartii subs. indologenes pv. cepacicola	calcium/sodium antiporter	PANS_07_4_03255	P. stewartii subs. indologenes pv. setariae pv. nov.	100	PNA_03_3-->PANS_07_4
PNA_03_3_03376	P. stewartii subs. indologenes pv. cepacicola	phospholipid ABC transporter ATP-binding protein MlaF	PANS_07_4_03254	P. stewartii subs. indologenes pv. setariae pv. nov.	99.877	PNA_03_3-->PANS_07_4
PNA_03_3_03383	P. stewartii subs. indologenes pv. cepacicola	helix-turn-helix domain-containing protein	PANS_07_4_03247	P. stewartii subs. indologenes pv. setariae pv. nov.	100	PNA_03_3-->PANS_07_4
PNA_03_3_03385	P. stewartii subs. indologenes pv. cepacicola	50S ribosomal protein L21	PANS_07_4_03245	P. stewartii subs. indologenes pv. setariae pv. nov.	100	PNA_03_3-->PANS_07_4
PNA_03_3_03396	P. stewartii subs. indologenes pv. cepacicola	ribosome maturation factor RimP	PANS_07_4_03234	P. stewartii subs. indologenes pv. setariae pv. nov.	100	PNA_03_3-->PANS_07_4
PNA_03_3_03399	P. stewartii subs. indologenes pv. cepacicola	ribosome-binding factor A	PANS_07_4_03231	P. stewartii subs. indologenes pv. setariae pv. nov.	100	PNA_03_3-->PANS_07_4
PNA_03_3_03400	P. stewartii subs. indologenes pv. cepacicola	tRNA pseudouridine(55) synthase TruB	PANS_07_4_03230	P. stewartii subs. indologenes pv. setariae pv. nov.	100	PNA_03_3-->PANS_07_4
PNA_03_3_03401	P. stewartii subs. indologenes pv. cepacicola	30S ribosomal protein S15	PANS_07_4_03229	P. stewartii subs. indologenes pv. setariae pv. nov.	100	PNA_03_3-->PANS_07_4
PNA_03_3_03408	P. stewartii subs. indologenes pv. cepacicola	SCP2 sterol-binding domain-containing protein	PANS_07_4_03222	P. stewartii subs. indologenes pv. setariae pv. nov.	100	PNA_03_3-->PANS_07_4
PNA_03_3_03974	P. stewartii subs. indologenes pv. cepacicola	Uncharacterised protein	PANS_07_14_01027	P. stewartii subs. indologenes pv. setariae pv. nov.	100	PNA_03_3-->PANS_07_14
PNA_14_11_00062	P. stewartii subs. indologenes pv. cepacicola	ABC transporter permease	PANS_07_4_02291	P. stewartii subs. indologenes pv. setariae pv. nov.	100	PNA_14_11-->PANS_07_4
PNA_14_11_00165	P. stewartii subs. indologenes pv. cepacicola	tRNA uridine 5-oxyacetic acid(34) methyltransferase CmoM	PANS_07_14_00595	P. stewartii subs. indologenes pv. setariae pv. nov.	100	PANS_07_14-->PNA_14_11
PNA_14_11_01866	P. stewartii subs. indologenes pv. cepacicola	flagellar assembly protein FliH	PANS_07_14_01291	P. stewartii subs. indologenes pv. setariae pv. nov.	100	PANS_07_14-->PNA_14_11
PNA_15_2_02119	P. stewartii subs. indologenes pv. setariae	sugar ABC transporter ATP-binding protein	PANS_07_4_00133	P. stewartii subs. indologenes pv. setariae pv. nov.	100	PANS_07_4-->PNA_15_2
PNA_15_2_02192	P. stewartii subs. indologenes pv. setariae	YbaK/prolyl-tRNA synthetase associated domain-containing protein	PANS_07_4_00065	P. stewartii subs. indologenes pv. setariae pv. nov.	100	PNA_15_2-->PANS_07_4
PNA_15_2_02495	P. stewartii subs. indologenes pv. setariae	cytochrome ubiquinol oxidase subunit I	PANS_07_14_02491	P. stewartii subs. indologenes pv. setariae pv. nov.	100	PNA_15_2-->PANS_07_14
PNA_15_2_02511	P. stewartii subs. indologenes pv. setariae	acyl-CoA thioester hydrolase	PANS_07_14_02475	P. stewartii subs. indologenes pv. setariae pv. nov.	100	PNA_15_2-->PANS_07_14
PNA_15_2_02602	P. stewartii subs. indologenes pv. setariae	ADP-ribose pyrophosphatase	PANS_07_14_02385	P. stewartii subs. indologenes pv. setariae pv. nov.	100	PNA_15_2-->PANS_07_14

## Sheet: S3
Table S3: Mapping and annotation results of donor and recipient genes involved in horizontal gene transfer (HGT)
Tags	SeqName	Description	Length	#Hits	e-Value	sim mean	#GO	GO IDs	GO Names	Enzyme Codes	Enzyme Names	InterPro IDs	InterPro GO IDs	InterPro GO Names
[BLASTED, MAPPED, ANNOTATED]	NCPPB2275_00009	murein lipoprotein	79	20	1.55135e-46	99.49	7	P:GO:0030258; P:GO:0043580; F:GO:0008289; F:GO:0042834; C:GO:0005576; C:GO:0005618; C:GO:0009279	P:lipid modification; P:periplasmic space organization; F:lipid binding; F:peptidoglycan binding; C:extracellular region; C:cell wall; C:cell outer membrane
[BLASTED, MAPPED, ANNOTATED]	NCPPB2275_00026	endopeptidase	153	20	1.86934e-107	95.25	1	F:GO:0016787	F:hydrolase activity	EC:3	Hydrolases
[BLASTED, MAPPED, ANNOTATED]	NCPPB2275_00028	glutathione peroxidase	182	20	8.68348e-133	96.66	4	P:GO:0006979; P:GO:0098869; F:GO:0004602; F:GO:0051920	P:response to oxidative stress; P:cellular oxidant detoxification; F:glutathione peroxidase activity; F:peroxiredoxin activity	EC:1.11; EC:1; EC:1.11.1; EC:1.11.1.15; EC:1.11.1.9	Acting on a peroxide as acceptor; Oxidoreductases; Acting on a peroxide as acceptor; Acting on a peroxide as acceptor; Glutathione peroxidase
[BLASTED, MAPPED, ANNOTATED]	NCPPB2275_00030	integration host factor subunit alpha	101	20	2.40187e-65	99.8	4	P:GO:0006310; P:GO:0006355; P:GO:0006417; F:GO:0003677	P:DNA recombination; P:regulation of transcription, DNA-templated; P:regulation of translation; F:DNA binding
[BLASTED, MAPPED, ANNOTATED]	NCPPB2275_00032	phenylalanine--tRNA ligase subunit alpha	328	20	0	99.07	6	P:GO:0006432; F:GO:0000049; F:GO:0000287; F:GO:0004826; F:GO:0005524; C:GO:0005737	P:phenylalanyl-tRNA aminoacylation; F:tRNA binding; F:magnesium ion binding; F:phenylalanine-tRNA ligase activity; F:ATP binding; C:cytoplasm	EC:6.1.1.20; EC:6.1; EC:6.1.1; EC:6	Phenylalanine--tRNA ligase; Forming carbon-oxygen bonds; Forming carbon-oxygen bonds; Ligases
[BLASTED, MAPPED, ANNOTATED]	NCPPB2275_00033	50S ribosomal protein L20	119	20	8.04544e-75	99.45	5	P:GO:0000027; P:GO:0006412; F:GO:0003735; F:GO:0019843; C:GO:0005840	P:ribosomal large subunit assembly; P:translation; F:structural constituent of ribosome; F:rRNA binding; C:ribosome
[BLASTED, MAPPED, ANNOTATED]	NCPPB2275_00035	translation initiation factor IF-3	161	20	1.86228e-110	99.84	3	P:GO:0006413; F:GO:0003743; C:GO:0005737	P:translational initiation; F:translation initiation factor activity; C:cytoplasm
[BLASTED, MAPPED, ANNOTATED]	NCPPB2275_00042	hexitol phosphatase HxpB	223	20	2.93617e-162	94.43	2	F:GO:0016787; F:GO:0046872	F:hydrolase activity; F:metal ion binding	EC:3	Hydrolases
[BLASTED, MAPPED, ANNOTATED]	NCPPB2275_00043	metal-dependent hydrolase	197	20	7.73537e-140	95.46	1	F:GO:0016787	F:hydrolase activity	EC:3	Hydrolases
[BLASTED, MAPPED, ANNOTATED]	NCPPB2275_00061	ABC transporter permease	356	20	0	98.25	4	P:GO:0055085; F:GO:0022857; C:GO:0005886; C:GO:0016021	P:transmembrane transport; F:transmembrane transporter activity; C:plasma membrane; C:integral component of membrane	EC:7	Translocases
[BLASTED, MAPPED, ANNOTATED]	NCPPB2275_00075	DotU family type IV/VI secretion system protein	406	20	0	96.84	1	C:GO:0016021	C:integral component of membrane
[BLASTED]	NCPPB2275_00080	putative type VI secretion system-associated protein	314	20	0	91.98
[BLASTED, MAPPED, ANNOTATED]	NCPPB2275_00091	lipoprotein localization protein LolB	209	20	2.03557e-150	95.84	3	P:GO:0015031; P:GO:0044874; C:GO:0009279	P:protein transport; P:lipoprotein localization to outer membrane; C:cell outer membrane
[BLASTED, MAPPED, ANNOTATED]	NCPPB2275_00095	stress-induced protein YchH	92	20	6.69969e-61	90.49	1	C:GO:0016021	C:integral component of membrane
[BLASTED, MAPPED, ANNOTATED]	NCPPB2275_00096	aminoacyl-tRNA hydrolase	196	20	3.4109e-140	99.69	3	P:GO:0006412; F:GO:0004045; C:GO:0005737	P:translation; F:aminoacyl-tRNA hydrolase activity; C:cytoplasm	EC:3.1; EC:3; EC:3.1.1.29; EC:3.1.1; EC:3.1.1.1	Acting on ester bonds; Hydrolases; Aminoacyl-tRNA hydrolase; Acting on ester bonds; Carboxylesterase
[BLASTED, MAPPED, ANNOTATED]	NCPPB2275_00099	chemotaxis protein	515	20	0	91.52	4	P:GO:0006935; P:GO:0007165; F:GO:0004888; C:GO:0016021	P:chemotaxis; P:signal transduction; F:transmembrane signaling receptor activity; C:integral component of membrane
[BLASTED]	NCPPB2275_00108	unnamed protein product	87	20	7.57503e-56	83.48
[BLASTED]	NCPPB2275_00147	four-helix bundle copper-binding protein	109	20	1.22456e-68	92.87
[BLASTED, MAPPED, ANNOTATED]	NCPPB2275_00197	GlsB/YeaQ/YmgE family stress response membrane protein	83	20	1.648e-44	99.51	2	C:GO:0005886; C:GO:0016021	C:plasma membrane; C:integral component of membrane
[BLASTED]	NCPPB2275_00208	MULTISPECIES: hypothetical protein	128	20	2.26218e-90	88.15
[BLASTED]	NCPPB2275_00222	hypothetical protein	168	20	2.53887e-121	76.84
[BLASTED, MAPPED, ANNOTATED]	NCPPB2275_00245	penicillin-binding protein activator LpoB	201	20	6.8724e-138	91.75	5	P:GO:0008360; P:GO:0009252; P:GO:0050790; F:GO:0030234; C:GO:0031241	P:regulation of cell shape; P:peptidoglycan biosynthetic process; P:regulation of catalytic activity; F:enzyme regulator activity; C:periplasmic side of cell outer membrane
[BLASTED]	NCPPB2275_00246	DUF1425 domain-containing protein	123	20	1.48632e-83	95.54
[BLASTED, MAPPED, ANNOTATED]	NCPPB2275_00247	purine nucleoside phosphoramidase	117	20	8.61862e-80	97.06	1	F:GO:0016787	F:hydrolase activity	EC:3	Hydrolases
[BLASTED, MAPPED, ANNOTATED]	NCPPB2275_00256	Acyl carrier protein	79	20	6.16692e-47	98.72	4	P:GO:0006633; F:GO:0000036; F:GO:0031177; C:GO:0005737	P:fatty acid biosynthetic process; F:acyl carrier activity; F:phosphopantetheine binding; C:cytoplasm
[BLASTED, MAPPED, ANNOTATED]	NCPPB2275_00257	3-oxoacyl-ACP reductase FabG	245	20	6.86237e-172	98.93	5	P:GO:0006633; F:GO:0004316; F:GO:0051287; F:GO:0102131; F:GO:0102132	P:fatty acid biosynthetic process; F:3-oxoacyl-[acyl-carrier-protein] reductase (NADPH) activity; F:NAD binding; F:3-oxo-glutaryl-[acp] methyl ester reductase activity; F:3-oxo-pimeloyl-[acp] methyl ester reductase activity	EC:2.3.1.85; EC:1.1; EC:2.3; EC:1; EC:2; EC:1.1.1; EC:1.1.1.100; EC:2.3.1	Fatty-acid synthase system; Acting on the CH-OH group of donors; Acyltransferases; Oxidoreductases; Transferases; Acting on the CH-OH group of donors; 3-oxoacyl-[acyl-carrier-protein] reductase; Acyltransferases
[BLASTED, MAPPED, ANNOTATED]	NCPPB2275_00259	ketoacyl-ACP synthase III	318	20	0	97.27	4	P:GO:0006633; F:GO:0004315; F:GO:0033818; C:GO:0005737	P:fatty acid biosynthetic process; F:3-oxoacyl-[acyl-carrier-protein] synthase activity; F:beta-ketoacyl-acyl-carrier-protein synthase III activity; C:cytoplasm	EC:2.3.1.41; EC:2.3.1.85; EC:2.3.1.180; EC:2.3; EC:2; EC:2.3.1	Beta-ketoacyl-[acyl-carrier-protein] synthase I; Fatty-acid synthase system; Beta-ketoacyl-[acyl-carrier-protein] synthase III; Acyltransferases; Transferases; Acyltransferases
[BLASTED]	NCPPB2275_00262	23S rRNA accumulation protein YceD	174	20	6.85224e-122	97.95
[BLASTED, MAPPED, ANNOTATED]	NCPPB2275_00268	flagellar assembly peptidoglycan hydrolase FlgJ	315	20	0	96.07	5	P:GO:0008152; P:GO:0044780; F:GO:0004040; F:GO:0016798; C:GO:0042597	P:metabolic process; P:bacterial-type flagellum assembly; F:amidase activity; F:hydrolase activity, acting on glycosyl bonds; C:periplasmic space	EC:3.5.1; EC:3.5.1.4; EC:3.2; EC:3.5; EC:3	Acting on carbon-nitrogen bonds, other than peptide bonds; Amidase; Glycosylases; Acting on carbon-nitrogen bonds, other than peptide bonds; Hydrolases
[BLASTED, MAPPED, ANNOTATED]	NCPPB2275_00273	flagellar hook protein FlgE	416	20	0	88.9	2	P:GO:0071973; C:GO:0009425	P:bacterial-type flagellum-dependent cell motility; C:bacterial-type flagellum basal body
[BLASTED, MAPPED, ANNOTATED]	NCPPB2275_00275	flagellar basal body rod protein FlgC	135	20	5.99404e-90	99.63	2	P:GO:0071973; C:GO:0030694	P:bacterial-type flagellum-dependent cell motility; C:bacterial-type flagellum basal body, rod
[BLASTED, MAPPED, ANNOTATED]	NCPPB2275_00279	flagellar biosynthesis protein FlgN	144	20	9.73595e-101	91.9	1	P:GO:0044780	P:bacterial-type flagellum assembly
[BLASTED]	NCPPB2275_00285	lipoprotein	188	20	4.67056e-135	96.22
[BLASTED, MAPPED, ANNOTATED]	NCPPB2275_00286	dihydroorotase	348	20	0	97.82	4	P:GO:0019856; P:GO:0044205; F:GO:0004151; F:GO:0008270	P:pyrimidine nucleobase biosynthetic process; P:'de novo' UMP biosynthetic process; F:dihydroorotase activity; F:zinc ion binding	EC:3.5.2.3; EC:3.5.2; EC:3.5; EC:3	Dihydroorotase; Acting on carbon-nitrogen bonds, other than peptide bonds; Acting on carbon-nitrogen bonds, other than peptide bonds; Hydrolases
[BLASTED]	NCPPB2275_00288	Uncharacterised protein	91	20	1.25758e-57	91.38
[BLASTED]	NCPPB2275_00289	biofilm formation regulator BssS	85	20	3.39819e-54	95.59
[BLASTED, MAPPED, ANNOTATED]	NCPPB2275_00309	AraC family transcriptional regulator	282	20	0	95.16	3	P:GO:0006355; F:GO:0003700; F:GO:0043565	P:regulation of transcription, DNA-templated; F:DNA-binding transcription factor activity; F:sequence-specific DNA binding
[BLASTED]	NCPPB2275_00369	DUF882 domain-containing protein	184	20	2.42991e-133	94.55
[BLASTED, MAPPED, ANNOTATED]	NCPPB2275_00394	outer membrane lipoprotein chaperone LolA	204	20	4.03966e-147	97.31	3	P:GO:0042953; P:GO:0044874; C:GO:0042597	P:lipoprotein transport; P:lipoprotein localization to outer membrane; C:periplasmic space
[BLASTED, MAPPED, ANNOTATED]	NCPPB2275_00418	DUF2593 family protein	156	20	3.99877e-109	90.87	1	C:GO:0016021	C:integral component of membrane
[BLASTED, MAPPED, ANNOTATED]	NCPPB2275_00429	membrane protein	133	20	5.40538e-89	85.81	1	C:GO:0016021	C:integral component of membrane
[BLASTED, MAPPED, ANNOTATED]	NCPPB2275_00530	3-deoxy-7-phosphoheptulonate synthase AroG	351	20	0	98.44	4	P:GO:0008652; P:GO:0009073; P:GO:0009423; F:GO:0003849	P:cellular amino acid biosynthetic process; P:aromatic amino acid family biosynthetic process; P:chorismate biosynthetic process; F:3-deoxy-7-phosphoheptulonate synthase activity	EC:2.5.1; EC:2.5; EC:2; EC:2.5.1.54	Transferring alkyl or aryl groups, other than methyl groups; Transferring alkyl or aryl groups, other than methyl groups; Transferases; 3-deoxy-7-phosphoheptulonate synthase
[BLASTED, MAPPED, ANNOTATED]	NCPPB2275_00545	Tol-Pal system protein TolQ	229	20	4.55578e-163	98.86	4	P:GO:0007049; P:GO:0043213; P:GO:0051301; C:GO:0005887	P:cell cycle; P:bacteriocin transport; P:cell division; C:integral component of plasma membrane
[BLASTED, MAPPED, ANNOTATED]	NCPPB2275_00553	2-oxoglutarate dehydrogenase complex dihydrolipoyllysine-residue succinyltransferase	408	20	0	99.02	4	P:GO:0006099; P:GO:0033512; F:GO:0004149; C:GO:0045252	P:tricarboxylic acid cycle; P:L-lysine catabolic process to acetyl-CoA via saccharopine; F:dihydrolipoyllysine-residue succinyltransferase activity; C:oxoglutarate dehydrogenase complex	EC:2.3; EC:2.3.1.61; EC:2; EC:2.3.1	Acyltransferases; Dihydrolipoyllysine-residue succinyltransferase; Transferases; Acyltransferases
[BLASTED, MAPPED, ANNOTATED]	NCPPB2275_00560	GNAT family N-acetyltransferase	196	20	9.57947e-143	90.84	1	F:GO:0008080	F:N-acetyltransferase activity	EC:2.3; EC:2; EC:2.3.1	Acyltransferases; Transferases; Acyltransferases
[BLASTED, MAPPED, ANNOTATED]	NCPPB2275_00597	glutamate/aspartate ABC transporter permease GltK	226	20	2.60302e-155	98.98	4	P:GO:0006865; P:GO:0055085; F:GO:0022857; C:GO:0043190	P:amino acid transport; P:transmembrane transport; F:transmembrane transporter activity; C:ATP-binding cassette (ABC) transporter complex	EC:7	Translocases
[BLASTED, MAPPED, ANNOTATED]	NCPPB2275_00598	amino acid ABC transporter ATP-binding protein	242	20	5.88832e-178	98.4	5	P:GO:0003333; F:GO:0005524; F:GO:0015424; F:GO:0042626; C:GO:0016020	P:amino acid transmembrane transport; F:ATP binding; F:ATPase-coupled amino acid transmembrane transporter activity; F:ATPase-coupled transmembrane transporter activity; C:membrane	EC:3.6.1; EC:3.6; EC:3; EC:7.2.2; EC:7; EC:3.6.1.15	Acting on acid anhydrides; Acting on acid anhydrides; Hydrolases; Catalysing the translocation of inorganic cations; Translocases; Nucleoside-triphosphate phosphatase
[BLASTED, MAPPED, ANNOTATED]	NCPPB2275_00644	hypothetical protein C7433_1011276	210	16	1.08723e-151	88.14	1	C:GO:0016021	C:integral component of membrane
[BLASTED, MAPPED, ANNOTATED]	NCPPB2275_00666	hypothetical protein HA47_06970	76	5	4.30108e-46	99.73	1	C:GO:0016021	C:integral component of membrane
[BLASTED, MAPPED, ANNOTATED]	NCPPB2275_00884	mannosyltransferase	338	20	0	89.21	1	F:GO:0016757	F:transferase activity, transferring glycosyl groups	EC:2.4; EC:2	Glycosyltransferases; Transferases
[BLASTED, MAPPED, ANNOTATED]	NCPPB2275_00988	ribonuclease E inhibitor RraB	141	20	4.55201e-95	95.46	4	P:GO:0060702; F:GO:0019899; F:GO:0060698; C:GO:0005737	P:negative regulation of endoribonuclease activity; F:enzyme binding; F:endoribonuclease inhibitor activity; C:cytoplasm
[BLASTED, MAPPED, ANNOTATED]	NCPPB2275_01019	ribosome maturation factor RimP	144	20	9.82949e-101	98.74	2	P:GO:0042274; C:GO:0005737	P:ribosomal small subunit biogenesis; C:cytoplasm
[BLASTED, MAPPED, ANNOTATED]	NCPPB2275_01020	preprotein translocase subunit SecG	112	20	4.04535e-73	98.6	5	P:GO:0009306; P:GO:0071806; F:GO:0015450; C:GO:0005886; C:GO:0016021	P:protein secretion; P:protein transmembrane transport; F:P-P-bond-hydrolysis-driven protein transmembrane transporter activity; C:plasma membrane; C:integral component of membrane	EC:7.4.2.3; EC:7.4.2.4; EC:7	Mitochondrial protein-transporting ATPase; Chloroplast protein-transporting ATPase; Translocases
[BLASTED, MAPPED, ANNOTATED]	NCPPB2275_01021	phosphoglucosamine mutase	445	20	0	98.72	3	P:GO:0005975; F:GO:0000287; F:GO:0008966	P:carbohydrate metabolic process; F:magnesium ion binding; F:phosphoglucosamine mutase activity	EC:5.4; EC:5; EC:5.4.2.10; EC:5.4.2	Intramolecular transferases; Isomerases; Phosphoglucosamine mutase; Intramolecular transferases
[BLASTED, MAPPED, ANNOTATED]	NCPPB2275_01034	BolA family iron metabolism protein IbaG	86	20	3.04102e-56	99.71	1	F:GO:0003677	F:DNA binding
[BLASTED, MAPPED, ANNOTATED]	NCPPB2275_01042	3-deoxy-manno-octulosonate-8-phosphatase KdsC	189	20	7.03479e-133	96.33	4	P:GO:0009103; P:GO:0016311; F:GO:0019143; F:GO:0046872	P:lipopolysaccharide biosynthetic process; P:dephosphorylation; F:3-deoxy-manno-octulosonate-8-phosphatase activity; F:metal ion binding	EC:3.1; EC:3.1.3.45; EC:3; EC:3.1.3	Acting on ester bonds; 3-deoxy-manno-octulosonate-8-phosphatase; Hydrolases; Acting on ester bonds
[BLASTED, MAPPED, ANNOTATED]	NCPPB2275_01046	RNA polymerase factor sigma-54	479	20	0	98.33	6	P:GO:0045893; P:GO:2000142; F:GO:0001216; F:GO:0003677; F:GO:0003899; F:GO:0016987	P:positive regulation of transcription, DNA-templated; P:regulation of DNA-templated transcription, initiation; F:DNA-binding transcription activator activity; F:DNA binding; F:DNA-directed 5'-3' RNA polymerase activity; F:sigma factor activity	EC:2.7; EC:2; EC:2.7.7; EC:2.7.7.6	Transferring phosphorus-containing groups; Transferases; Transferring phosphorus-containing groups; DNA-directed RNA polymerase
[BLASTED, MAPPED, ANNOTATED]	NCPPB2275_01072	FxsA family protein	154	20	3.77075e-106	99.84	1	C:GO:0016021	C:integral component of membrane
[BLASTED, MAPPED, ANNOTATED]	NCPPB2275_01101	3-dehydro-L-gulonate 2-dehydrogenase	338	20	0	96.76	3	F:GO:0047559; F:GO:0070403; C:GO:0005737	F:3-dehydro-L-gulonate 2-dehydrogenase activity; F:NAD+ binding; C:cytoplasm	EC:1.1; EC:1; EC:1.1.1; EC:1.1.1.130	Acting on the CH-OH group of donors; Oxidoreductases; Acting on the CH-OH group of donors; 3-dehydro-L-gulonate 2-dehydrogenase
[BLASTED, MAPPED, ANNOTATED]	NCPPB2275_01111	NADPH-dependent L-lysine N(6)-monooxygenase	445	20	0	96.96	1	F:GO:0004497	F:monooxygenase activity	EC:1	Oxidoreductases
[BLASTED, MAPPED, ANNOTATED]	NCPPB2275_01148	response regulator	220	20	5.99887e-154	98.74	5	P:GO:0000160; P:GO:0006355; P:GO:0006508; F:GO:0003677; F:GO:0004190	P:phosphorelay signal transduction system; P:regulation of transcription, DNA-templated; P:proteolysis; F:DNA binding; F:aspartic-type endopeptidase activity	EC:3.4.99; EC:3.4.23.1; EC:3.4.23; EC:3.4.23.32; EC:3.4.23.43; EC:3.4.23.20; EC:3.4.23.25; EC:3.4.23.36; EC:3.4.23.4; EC:3.4.23.35; EC:3.4.23.5; EC:3.4.23.34; EC:3.4.23.15; EC:3.4; EC:3	Acting on peptide bonds (peptidases); Pepsin A; Acting on peptide bonds (peptidases); Scytalidopepsin B; Prepilin peptidase; Penicillopepsin; Saccharopepsin; Signal peptidase II; Chymosin; Barrierpepsin; Cathepsin D; Cathepsin E; Renin; Acting on peptide bonds (peptidases); Hydrolases
[BLASTED, MAPPED, ANNOTATED]	NCPPB2275_01169	CidA/LrgA family protein	142	20	1.10262e-90	94.61	2	C:GO:0005886; C:GO:0016021	C:plasma membrane; C:integral component of membrane
[BLASTED, MAPPED, ANNOTATED]	NCPPB2275_01177	teichuronopeptide biosynthesis TupA-like protein	317	20	0	99.03	1	F:GO:0016740	F:transferase activity	EC:2	Transferases
[BLASTED, MAPPED, ANNOTATED]	NCPPB2275_01185	single-stranded DNA-binding protein SSB1	181	20	9.70691e-127	97.08	4	P:GO:0006260; P:GO:0006281; P:GO:0006310; F:GO:0003697	P:DNA replication; P:DNA repair; P:DNA recombination; F:single-stranded DNA binding
[BLASTED, MAPPED, ANNOTATED]	NCPPB2275_01198	zinc uptake transcriptional repressor Zur	174	20	2.86131e-125	96.36	2	P:GO:0006355; F:GO:0003700	P:regulation of transcription, DNA-templated; F:DNA-binding transcription factor activity
[BLASTED]	NCPPB2275_01567	signal peptide prediction	399	20	0	98.68
[BLASTED, MAPPED, ANNOTATED]	NCPPB2275_02649	amylovoran biosynthesis protein AmsD	345	20	0	98.78	1	F:GO:0016757	F:transferase activity, transferring glycosyl groups	EC:2.4; EC:2	Glycosyltransferases; Transferases
[BLASTED, MAPPED, ANNOTATED]	NCPPB2275_02660	dTDP-4-dehydrorhamnose 3,5-epimerase	188	20	2.97824e-135	86.37	2	P:GO:0019305; F:GO:0008830	P:dTDP-rhamnose biosynthetic process; F:dTDP-4-dehydrorhamnose 3,5-epimerase activity	EC:5.1; EC:5.1.3.13; EC:5; EC:5.1.3	Racemases and epimerases; dTDP-4-dehydrorhamnose 3,5-epimerase; Isomerases; Racemases and epimerases
[BLASTED, MAPPED, ANNOTATED]	NCPPB2275_02733	GlxA family transcriptional regulator	383	20	0	90.59	4	P:GO:0006355; F:GO:0003700; F:GO:0043565; C:GO:0016021	P:regulation of transcription, DNA-templated; F:DNA-binding transcription factor activity; F:sequence-specific DNA binding; C:integral component of membrane
[BLASTED, MAPPED, ANNOTATED]	NCPPB2275_02754	ABC transporter permease	283	20	0	97.29	3	P:GO:0055085; C:GO:0005886; C:GO:0016021	P:transmembrane transport; C:plasma membrane; C:integral component of membrane
[BLASTED, MAPPED, ANNOTATED]	NCPPB2275_02755	ABC transporter ATP-binding protein	555	20	0	98.66	3	P:GO:0055085; F:GO:0005524; F:GO:0042626	P:transmembrane transport; F:ATP binding; F:ATPase-coupled transmembrane transporter activity	EC:3.6.1; EC:3.6; EC:3; EC:7; EC:7.2.2; EC:3.6.1.15	Acting on acid anhydrides; Acting on acid anhydrides; Hydrolases; Translocases; Catalysing the translocation of inorganic cations; Nucleoside-triphosphate phosphatase
[BLASTED, MAPPED, ANNOTATED]	NCPPB2275_02780	sugar ABC transporter ATP-binding protein	505	20	0	98.13	5	P:GO:0015752; F:GO:0005524; F:GO:0015611; F:GO:0043211; C:GO:0005886	P:D-ribose transmembrane transport; F:ATP binding; F:ABC-type D-ribose transporter activity; F:ATPase-coupled carbohydrate transmembrane transporter activity; C:plasma membrane	EC:3.6.1; EC:3.6; EC:3; EC:7.2.2; EC:7; EC:3.6.1.15; EC:7.5.2.8	Acting on acid anhydrides; Acting on acid anhydrides; Hydrolases; Catalysing the translocation of inorganic cations; Translocases; Nucleoside-triphosphate phosphatase; ABC-type D-allose transporter
[BLASTED, MAPPED, ANNOTATED]	NCPPB2275_02783	D-lyxose/D-mannose family sugar isomerase	231	20	1.89426e-170	95.17	2	F:GO:0016787; F:GO:0016853	F:hydrolase activity; F:isomerase activity	EC:3; EC:5	Hydrolases; Isomerases
[BLASTED]	NCPPB2275_02801	type VI secretion system tube protein Hcp	161	20	1.29019e-112	98.09
[BLASTED, MAPPED, ANNOTATED]	NCPPB2275_02807	serine/threonine-protein phosphatase	264	20	0	96.43	2	P:GO:0006470; F:GO:0004722	P:protein dephosphorylation; F:protein serine/threonine phosphatase activity	EC:3.1.3.16; EC:3.1; EC:3; EC:3.1.3	Protein-serine/threonine phosphatase; Acting on ester bonds; Hydrolases; Acting on ester bonds
[BLASTED]	NCPPB2275_02818	DcrB-related protein	147	20	7.66266e-103	94.28
[BLASTED]	NCPPB2275_02893	YfdX family protein	222	20	5.26856e-160	97.41
[BLASTED]	NCPPB2275_02894	hypothetical protein	81	20	6.00786e-51	72.28
[BLASTED, MAPPED, ANNOTATED]	NCPPB2275_02905	antibiotic biosynthesis monooxygenase	108	20	7.43085e-72	88.22	1	F:GO:0004497	F:monooxygenase activity	EC:1	Oxidoreductases
[BLASTED]	NCPPB2275_02906	SDR family oxidoreductase	286	20	0	96.49
[BLASTED, MAPPED, ANNOTATED]	NCPPB2275_02908	cytochrome ubiquinol oxidase subunit I	471	20	0	98.47	6	P:GO:0019646; F:GO:0009055; F:GO:0046872; C:GO:0005886; C:GO:0016021; C:GO:0070069	P:aerobic electron transport chain; F:electron transfer activity; F:metal ion binding; C:plasma membrane; C:integral component of membrane; C:cytochrome complex	EC:1	Oxidoreductases
[BLASTED, MAPPED, ANNOTATED]	NCPPB2275_02909	cytochrome d ubiquinol oxidase subunit II	335	20	0	97.87	3	F:GO:0016491; C:GO:0005886; C:GO:0016021	F:oxidoreductase activity; C:plasma membrane; C:integral component of membrane	EC:1	Oxidoreductases
[BLASTED, MAPPED, ANNOTATED]	NCPPB2275_02920	oxidative damage protection protein	91	20	2.55954e-61	99.83	1	F:GO:0005506	F:iron ion binding
[BLASTED]	NCPPB2275_02927	DUF2884 domain-containing protein	239	20	2.84548e-172	95.68
[BLASTED, MAPPED, ANNOTATED]	NCPPB2275_02929	PTS mannitol transporter subunit IIB	90	20	4.98435e-57	95.84	4	P:GO:0009401; P:GO:0034219; F:GO:0008982; F:GO:0103111	P:phosphoenolpyruvate-dependent sugar phosphotransferase system; P:carbohydrate transmembrane transport; F:protein-N(PI)-phosphohistidine-sugar phosphotransferase activity; F:D-glucosamine PTS permease activity	EC:2.7.1; EC:2.7; EC:2; EC:7; EC:2.7.1.69	Transferring phosphorus-containing groups; Transferring phosphorus-containing groups; Transferases; Translocases; Transferring phosphorus-containing groups
[BLASTED, MAPPED, ANNOTATED]	NCPPB2275_02935	YggS family pyridoxal phosphate-dependent enzyme	236	20	2.59789e-173	96.26	1	F:GO:0030170	F:pyridoxal phosphate binding
[BLASTED, MAPPED, ANNOTATED]	NCPPB2275_02946	biosynthetic arginine decarboxylase	660	20	0	98.85	5	P:GO:0006527; P:GO:0008295; P:GO:0009446; F:GO:0008792; F:GO:0046872	P:arginine catabolic process; P:spermidine biosynthetic process; P:putrescine biosynthetic process; F:arginine decarboxylase activity; F:metal ion binding	EC:4.1.1; EC:4.1; EC:4; EC:4.1.1.19	Carbon-carbon lyases; Carbon-carbon lyases; Lyases; Arginine decarboxylase
[BLASTED, MAPPED, ANNOTATED]	NCPPB2275_02948	M48 family metallopeptidase	252	20	0	97.03	3	P:GO:0006508; F:GO:0004222; F:GO:0046872	P:proteolysis; F:metalloendopeptidase activity; F:metal ion binding	EC:3.4.24; EC:3.4.24.61; EC:3.4.24.23; EC:3.4.24.24; EC:3.4.24.69; EC:3.4.24.64; EC:3.4.24.21; EC:3.4.24.22; EC:3.4; EC:3.4.24.17; EC:3.4.24.18; EC:3.4.24.19; EC:3.4.99; EC:3.4.24.70; EC:3.4.24.71; EC:3.4.24.72; EC:3.4.24.56; EC:3.4.24.35; EC:3.4.24.57; EC:3.4.24.14; EC:3.4.24.37; EC:3.4.24.59; EC:3.4.24.11; EC:3.4.24.55; EC:3	Acting on peptide bonds (peptidases); Nardilysin; Matrilysin; Gelatinase A; Bontoxilysin; Mitochondrial processing peptidase; Astacin; Stromelysin 2; Acting on peptide bonds (peptidases); Stromelysin 1; Meprin A; Procollagen C-endopeptidase; Acting on peptide bonds (peptidases); Oligopeptidase A; Endothelin-converting enzyme 1; Fibrolase; Insulysin; Gelatinase B; O-sialoglycoprotein endopeptidase…
[BLASTED, MAPPED, ANNOTATED]	NCPPB2275_02967	glycine cleavage system protein GcvH	129	20	2.43115e-87	95.94	2	P:GO:0019464; C:GO:0005960	P:glycine decarboxylation via glycine cleavage system; C:glycine cleavage complex
[BLASTED]	NCPPB2275_02974	FAD assembly factor SdhE	89	20	4.07942e-59	98.41
[BLASTED, MAPPED, ANNOTATED]	NCPPB2275_02977	bifunctional protein-disulfide isomerase/oxidoreductase DsbC	238	20	6.57632e-176	96.81	2	F:GO:0016853; C:GO:0042597	F:isomerase activity; C:periplasmic space	EC:5	Isomerases
[BLASTED, MAPPED, ANNOTATED]	NCPPB2275_02979	Peptide chain release factor 2	365	20	0	97.82	3	P:GO:0006415; F:GO:0016149; C:GO:0005737	P:translational termination; F:translation release factor activity, codon specific; C:cytoplasm
[BLASTED]	NCPPB2275_02997	prepilin-type N-terminal cleavage/methylation domain-containing protein	109	20	1.0411e-71	87.75
[BLASTED, MAPPED, ANNOTATED]	NCPPB2275_03036	6-carboxytetrahydropterin synthase QueD	120	20	2.02922e-84	98.45	3	P:GO:0008616; F:GO:0046872; F:GO:0070497	P:queuosine biosynthetic process; F:metal ion binding; F:6-carboxy-5,6,7,8-tetrahydropterin synthase activity	EC:4.2.1; EC:4.2; EC:4; EC:4.1.2.50	Carbon-oxygen lyases; Carbon-oxygen lyases; Lyases; 6-carboxytetrahydropterin synthase
[BLASTED, MAPPED, ANNOTATED]	NCPPB2275_03043	amino acid ABC transporter permease	214	20	6.54427e-147	97.79	4	P:GO:0006865; P:GO:0055085; F:GO:0022857; C:GO:0043190	P:amino acid transport; P:transmembrane transport; F:transmembrane transporter activity; C:ATP-binding cassette (ABC) transporter complex	EC:7	Translocases
[BLASTED, MAPPED, ANNOTATED]	NCPPB2275_03050	uroporphyrinogen-III C-methyltransferase	472	20	0	98.77	7	P:GO:0009236; P:GO:0019354; P:GO:0032259; F:GO:0004851; F:GO:0043115; F:GO:0051266; F:GO:0051287	P:cobalamin biosynthetic process; P:siroheme biosynthetic process; P:methylation; F:uroporphyrin-III C-methyltransferase activity; F:precorrin-2 dehydrogenase activity; F:sirohydrochlorin ferrochelatase activity; F:NAD binding	EC:2.1; EC:1.3; EC:1; EC:2; EC:4; EC:4.99.1.4; EC:2.1.1.107; EC:4.99.1.1; EC:1.3.1.76; EC:2.1.1; EC:1.3.1	Transferring one-carbon groups; Acting on the CH-CH group of donors; Oxidoreductases; Transferases; Lyases; Sirohydrochlorin ferrochelatase; Uroporphyrinogen-III C-methyltransferase; Protoporphyrin ferrochelatase; Precorrin-2 dehydrogenase; Transferring one-carbon groups; Acting on the CH-CH group of donors
[BLASTED, MAPPED, ANNOTATED]	NCPPB2275_03059	5'/3'-nucleotidase SurE	254	20	0	97.09	7	P:GO:0016311; F:GO:0000166; F:GO:0004309; F:GO:0008253; F:GO:0008254; F:GO:0046872; C:GO:0005737	P:dephosphorylation; F:nucleotide binding; F:exopolyphosphatase activity; F:5'-nucleotidase activity; F:3'-nucleotidase activity; F:metal ion binding; C:cytoplasm	EC:3.6.1.11; EC:3.6.1; EC:3.1; EC:3.6; EC:3; EC:3.1.3.6; EC:3.1.3.5; EC:3.1.3.31; EC:3.1.3	Exopolyphosphatase; Acting on acid anhydrides; Acting on ester bonds; Acting on acid anhydrides; Hydrolases; 3'-nucleotidase; 5'-nucleotidase; Nucleotidase; Acting on ester bonds
[BLASTED, MAPPED, ANNOTATED]	NCPPB2275_03069	nicotinamide-nucleotide amidase	165	20	1.5425e-114	95	1	F:GO:0019159	F:nicotinamide-nucleotide amidase activity	EC:3.5.1; EC:3.5.1.42; EC:3.5; EC:3	Acting on carbon-nitrogen bonds, other than peptide bonds; Nicotinamide-nucleotide amidase; Acting on carbon-nitrogen bonds, other than peptide bonds; Hydrolases
[BLASTED, MAPPED, ANNOTATED]	NCPPB2275_03086	MULTISPECIES: hypothetical protein	185	20	2.30885e-131	89.95	1	C:GO:0016021	C:integral component of membrane
[BLASTED, MAPPED, ANNOTATED]	NCPPB2275_03731	purine-nucleoside phosphorylase	238	20	2.11143e-173	99.41	2	P:GO:0042278; F:GO:0004731	P:purine nucleoside metabolic process; F:purine-nucleoside phosphorylase activity	EC:2.4.2; EC:2.4.2.1; EC:2.4; EC:2	Glycosyltransferases; Purine-nucleoside phosphorylase; Glycosyltransferases; Transferases
[BLASTED, MAPPED, ANNOTATED]	NCPPB2275_03734	deoxyribose-phosphate aldolase	260	20	0	99.15	5	P:GO:0009264; P:GO:0016052; P:GO:0046386; F:GO:0004139; C:GO:0005737	P:deoxyribonucleotide catabolic process; P:carbohydrate catabolic process; P:deoxyribose phosphate catabolic process; F:deoxyribose-phosphate aldolase activity; C:cytoplasm	EC:4.1.2; EC:4.1; EC:4.1.2.4; EC:4	Carbon-carbon lyases; Carbon-carbon lyases; Deoxyribose-phosphate aldolase; Lyases
[BLASTED]	NCPPB2275_03747	ABC transporter substrate-binding protein	334	20	0	96.97
[BLASTED]	NCPPB2275_03751	ABC transporter substrate-binding protein	300	20	0	96.1
[BLASTED, MAPPED, ANNOTATED]	NCPPB2275_03794	PTS fructose transporter subunit IIB	105	20	5.54114e-67	95.67	4	P:GO:0009401; P:GO:0015755; F:GO:0022877; F:GO:0103111	P:phosphoenolpyruvate-dependent sugar phosphotransferase system; P:fructose transmembrane transport; F:protein-N(PI)-phosphohistidine-fructose phosphotransferase system transporter activity; F:D-glucosamine PTS permease activity	EC:2.7.1; EC:2.7; EC:2; EC:7; EC:2.7.1.69	Transferring phosphorus-containing groups; Transferring phosphorus-containing groups; Transferases; Translocases; Transferring phosphorus-containing groups
[BLASTED, MAPPED, ANNOTATED]	NCPPB2275_03795	PTS fructose transporter subunit IIC	364	20	0	98.47	8	P:GO:0009401; P:GO:0034219; P:GO:1902600; F:GO:0005351; F:GO:0008982; F:GO:0103111; C:GO:0005886; C:GO:0016021	P:phosphoenolpyruvate-dependent sugar phosphotransferase system; P:carbohydrate transmembrane transport; P:proton transmembrane transport; F:carbohydrate:proton symporter activity; F:protein-N(PI)-phosphohistidine-sugar phosphotransferase activity; F:D-glucosamine PTS permease activity; C:plasma membrane; C:integral component of membrane	EC:2.7.1; EC:2.7; EC:2; EC:7; EC:2.7.1.69	Transferring phosphorus-containing groups; Transferring phosphorus-containing groups; Transferases; Translocases; Transferring phosphorus-containing groups
[BLASTED, MAPPED, ANNOTATED]	NCPPB2275_03796	class II fructose-bisphosphate aldolase family protein	284	20	0	95.05	3	P:GO:0005975; F:GO:0008270; F:GO:0016832	P:carbohydrate metabolic process; F:zinc ion binding; F:aldehyde-lyase activity	EC:4.1.2; EC:4.1; EC:4	Carbon-carbon lyases; Carbon-carbon lyases; Lyases
[BLASTED, MAPPED, ANNOTATED]	NCPPB2275_03797	ketose-bisphosphate aldolase	287	20	0	99.07	3	P:GO:0005975; F:GO:0008270; F:GO:0009025	P:carbohydrate metabolic process; F:zinc ion binding; F:tagatose-bisphosphate aldolase activity	EC:4.1.2; EC:4.1; EC:4; EC:4.1.2.40	Carbon-carbon lyases; Carbon-carbon lyases; Lyases; Tagatose-bisphosphate aldolase
[BLASTED]	NCPPB2275_03799	NAD(P)H-dependent oxidoreductase	194	20	3.81833e-142	97.87
[BLASTED, MAPPED, ANNOTATED]	NCPPB2275_03801	DNA topoisomerase IV subunit B	632	20	0	98.68	6	P:GO:0006265; P:GO:0007059; F:GO:0003677; F:GO:0003918; F:GO:0005524; C:GO:0005694	P:DNA topological change; P:chromosome segregation; F:DNA binding; F:DNA topoisomerase type II (double strand cut, ATP-hydrolyzing) activity; F:ATP binding; C:chromosome	EC:3.6.1; EC:3.6; EC:3; EC:5; EC:5.6.2; EC:5.6.2.2; EC:3.6.1.15	Acting on acid anhydrides; Acting on acid anhydrides; Hydrolases; Isomerases; Isomerases altering macromolecular conformation; DNA topoisomerase (ATP-hydrolyzing); Nucleoside-triphosphate phosphatase
[BLASTED, MAPPED, ANNOTATED]	NCPPB2275_03802	esterase YqiA	194	20	2.33499e-141	98.49	1	F:GO:0016787	F:hydrolase activity	EC:3	Hydrolases
[BLASTED, MAPPED, ANNOTATED]	NCPPB2275_03806	outer membrane channel protein TolC	491	20	0	95.67	4	P:GO:0055085; F:GO:0015562; C:GO:0016021; C:GO:0019867	P:transmembrane transport; F:efflux transmembrane transporter activity; C:integral component of membrane; C:outer membrane	EC:7	Translocases
[BLASTED, MAPPED, ANNOTATED]	NCPPB2275_03815	SH3 domain-containing protein	207	20	2.5204e-147	97.33	1	C:GO:0016021	C:integral component of membrane
[BLASTED, MAPPED, ANNOTATED]	NCPPB2281_00023	kinase inhibitor	159	20	4.27588e-112	98.57	2	P:GO:0016310; F:GO:0016301	P:phosphorylation; F:kinase activity	EC:2.7; EC:2	Transferring phosphorus-containing groups; Transferases
[BLASTED, MAPPED, ANNOTATED]	NCPPB2281_00043	YbhQ family protein	131	20	1.7184e-88	95.23	1	C:GO:0016021	C:integral component of membrane
[BLASTED, MAPPED, ANNOTATED]	NCPPB2281_00081	23S rRNA (adenine(1618)-N(6))-methyltransferase RlmF	308	20	0	98.13	4	P:GO:0031167; F:GO:0003676; F:GO:0052907; C:GO:0005737	P:rRNA methylation; F:nucleic acid binding; F:23S rRNA (adenine(1618)-N(6))-methyltransferase activity; C:cytoplasm	EC:2.1; EC:2.1.1.181; EC:2; EC:2.1.1	Transferring one-carbon groups; 23S rRNA (adenine(1618)-N(6))-methyltransferase; Transferases; Transferring one-carbon groups
[BLASTED, MAPPED, ANNOTATED]	NCPPB2281_00089	manganese-binding transcriptional regulator MntR	153	20	1.8574e-105	98.21	5	P:GO:0006355; F:GO:0003677; F:GO:0003700; F:GO:0046914; F:GO:0046983	P:regulation of transcription, DNA-templated; F:DNA binding; F:DNA-binding transcription factor activity; F:transition metal ion binding; F:protein dimerization activity
[BLASTED, MAPPED, ANNOTATED]	NCPPB2281_00091	HlyD family secretion protein	383	20	0	97.5	2	P:GO:0055085; C:GO:0016021	P:transmembrane transport; C:integral component of membrane
[BLASTED, MAPPED, ANNOTATED]	NCPPB2281_00117	spermidine/putrescine ABC transporter substrate-binding protein PotF	370	20	0	98.58	3	P:GO:0015846; F:GO:0019808; C:GO:0042597	P:polyamine transport; F:polyamine binding; C:periplasmic space
[BLASTED, MAPPED, ANNOTATED]	NCPPB2281_00120	putrescine ABC transporter permease PotI	282	20	0	99.09	3	P:GO:0055085; C:GO:0005886; C:GO:0016021	P:transmembrane transport; C:plasma membrane; C:integral component of membrane
[BLASTED, MAPPED, ANNOTATED]	NCPPB2281_00136	ATP-dependent Clp protease adapter ClpS	107	20	2.91271e-74	96.08	3	P:GO:0006508; P:GO:0030163; F:GO:0008233	P:proteolysis; P:protein catabolic process; F:peptidase activity	EC:3.4; EC:3	Acting on peptide bonds (peptidases); Hydrolases
[BLASTED, MAPPED, ANNOTATED]	NCPPB2281_00145	outer membrane lipoprotein chaperone LolA	204	20	4.03966e-147	97.31	3	P:GO:0042953; P:GO:0044874; C:GO:0042597	P:lipoprotein transport; P:lipoprotein localization to outer membrane; C:periplasmic space
[BLASTED, MAPPED, ANNOTATED]	NCPPB2281_00151	formate transporter FocA	287	20	0	96.16	4	P:GO:0015724; P:GO:0055085; F:GO:0015499; C:GO:0016021	P:formate transport; P:transmembrane transport; F:formate transmembrane transporter activity; C:integral component of membrane	EC:7	Translocases
[BLASTED, MAPPED, ANNOTATED]	NCPPB2281_00156	30S ribosomal protein S1	570	20	0	99.65	4	P:GO:0006412; F:GO:0003723; F:GO:0003735; C:GO:0005840	P:translation; F:RNA binding; F:structural constituent of ribosome; C:ribosome
[BLASTED, MAPPED, ANNOTATED]	NCPPB2281_00190	paraquat-inducible protein B	548	20	0	98.27	1	C:GO:0016021	C:integral component of membrane
[BLASTED, MAPPED, ANNOTATED]	NCPPB2281_00192	bifunctional 3-hydroxydecanoyl-ACP dehydratase/trans-2-decenoyl-ACP isomerase	173	20	7.58384e-121	98.14	7	P:GO:0006633; F:GO:0004317; F:GO:0008659; F:GO:0008693; F:GO:0034017; F:GO:0047451; C:GO:0005737	P:fatty acid biosynthetic process; F:3-hydroxypalmitoyl-[acyl-carrier-protein] dehydratase activity; F:(3R)-hydroxymyristoyl-[acyl-carrier-protein] dehydratase activity; F:3-hydroxydecanoyl-[acyl-carrier-protein] dehydratase activity; F:trans-2-decenoyl-acyl-carrier-protein isomerase activity; F:3-hydroxyoctanoyl-[acyl-carrier-protein] dehydratase activity; C:cytoplasm	EC:4.2.1; EC:5.3.3.14; EC:5.3.3; EC:2.3.1.85; EC:2.3; EC:4.2; EC:2; EC:5.3; EC:4; EC:4.2.1.59; EC:5; EC:2.3.1	Carbon-oxygen lyases; Trans-2-decenoyl-[acyl-carrier-protein] isomerase; Intramolecular oxidoreductases; Fatty-acid synthase system; Acyltransferases; Carbon-oxygen lyases; Transferases; Intramolecular oxidoreductases; Lyases; 3-hydroxyacyl-[acyl-carrier-protein] dehydratase; Isomerases; Acyltransferases
[BLASTED]	NCPPB2281_01517	MULTISPECIES: hypothetical protein	68	20	3.45091e-42	94.69
[BLASTED, MAPPED, ANNOTATED]	NCPPB2281_02359	OHCU decarboxylase	165	20	1.11208e-113	95.49	3	P:GO:0006144; F:GO:0004846; F:GO:0016829	P:purine nucleobase metabolic process; F:urate oxidase activity; F:lyase activity	EC:1.7.3; EC:1; EC:1.7; EC:4; EC:1.7.3.3	Acting on other nitrogenous compounds as donors; Oxidoreductases; Acting on other nitrogenous compounds as donors; Lyases; Factor independent urate hydroxylase
[BLASTED, MAPPED, ANNOTATED]	NCPPB2281_02441	TIGR01777 family protein	300	20	0	96.91	1	F:GO:0003824	F:catalytic activity
[BLASTED, MAPPED, ANNOTATED]	NCPPB2281_02725	M20 family metallopeptidase	390	20	0	99.22	1	F:GO:0008777	F:acetylornithine deacetylase activity	EC:3.5.1; EC:3.5; EC:3; EC:3.5.1.16	Acting on carbon-nitrogen bonds, other than peptide bonds; Acting on carbon-nitrogen bonds, other than peptide bonds; Hydrolases; Acetylornithine deacetylase
[BLASTED]	NCPPB2281_02726	ligand-binding protein SH3	179	20	3.06202e-127	87.3
[BLASTED, MAPPED, ANNOTATED]	NCPPB2281_02727	LPS export ABC transporter permease LptG	359	20	0	98.21	2	P:GO:0055085; C:GO:0043190	P:transmembrane transport; C:ATP-binding cassette (ABC) transporter complex
[BLASTED, MAPPED, ANNOTATED]	NCPPB2281_02728	LPS export ABC transporter permease LptF	367	20	0	97.87	2	P:GO:0055085; C:GO:0043190	P:transmembrane transport; C:ATP-binding cassette (ABC) transporter complex
[BLASTED, MAPPED, ANNOTATED]	NCPPB2281_02734	ribonuclease E inhibitor RraB	141	20	4.55201e-95	95.46	4	P:GO:0060702; F:GO:0019899; F:GO:0060698; C:GO:0005737	P:negative regulation of endoribonuclease activity; F:enzyme binding; F:endoribonuclease inhibitor activity; C:cytoplasm
[BLASTED, MAPPED, ANNOTATED]	NCPPB2281_02761	tRNA pseudouridine(55) synthase TruB	315	20	0	97.9	4	P:GO:0031119; F:GO:0003723; F:GO:0016829; F:GO:0106029	P:tRNA pseudouridine synthesis; F:RNA binding; F:lyase activity; F:tRNA pseudouridine synthase activity	EC:5.4.99.12; EC:5.4.99.45; EC:5.4.99.26; EC:5.4.99.25; EC:5.4.99.28; EC:5.4.99.27; EC:5.4; EC:4; EC:5; EC:5.4.99.42; EC:5.4.99.44	tRNA pseudouridine(38-40) synthase; tRNA pseudouridine(38/39) synthase; tRNA pseudouridine(65) synthase; tRNA pseudouridine(55) synthase; tRNA pseudouridine(32) synthase; tRNA pseudouridine(13) synthase; Intramolecular transferases; Lyases; Isomerases; tRNA pseudouridine(31) synthase; Mitochondrial tRNA pseudouridine(27/28) synthase
[BLASTED, MAPPED, ANNOTATED]	NCPPB2281_02776	50S ribosomal protein L21	104	20	1.42516e-67	98.98	4	P:GO:0006412; F:GO:0003735; F:GO:0019843; C:GO:0005840	P:translation; F:structural constituent of ribosome; F:rRNA binding; C:ribosome
[BLASTED, MAPPED, ANNOTATED]	NCPPB2281_02778	helix-turn-helix domain-containing protein	94	20	1.15054e-60	95.79	1	F:GO:0003677	F:DNA binding
[BLASTED, MAPPED, ANNOTATED]	NCPPB2281_02789	LPS export ABC transporter periplasmic protein LptC	194	20	2.30951e-141	94.57	4	P:GO:0015920; P:GO:0043165; F:GO:0015221; C:GO:0005887	P:lipopolysaccharide transport; P:Gram-negative-bacterium-type cell outer membrane assembly; F:lipopolysaccharide transmembrane transporter activity; C:integral component of plasma membrane	EC:7	Translocases
[BLASTED, MAPPED, ANNOTATED]	NCPPB2281_02793	ribosome hibernation promoting factor	96	20	1.54168e-62	96.79	1	P:GO:0006417	P:regulation of translation
[BLASTED, MAPPED, ANNOTATED]	NCPPB2281_02796	PTS phosphocarrier protein NPr	91	20	1.18139e-56	98.5	1	F:GO:0016740	F:transferase activity	EC:2	Transferases
[BLASTED, MAPPED, ANNOTATED]	NCPPB2281_02804	50S ribosomal protein L13	143	20	4.01737e-100	99.86	3	P:GO:0006412; F:GO:0003735; C:GO:0005840	P:translation; F:structural constituent of ribosome; C:ribosome
[BLASTED, MAPPED, ANNOTATED]	NCPPB2281_02817	co-chaperone GroES	98	20	1.92855e-58	99.43	3	P:GO:0006457; F:GO:0005524; C:GO:0005737	P:protein folding; F:ATP binding; C:cytoplasm
[BLASTED, MAPPED, ANNOTATED]	NCPPB2281_02818	FxsA family protein	154	20	3.77075e-106	99.84	1	C:GO:0016021	C:integral component of membrane
[BLASTED, MAPPED, ANNOTATED]	NCPPB2281_02837	carbohydrate porin	436	20	0	98.62	5	P:GO:0008643; P:GO:0055085; F:GO:0015288; C:GO:0009279; C:GO:0046930	P:carbohydrate transport; P:transmembrane transport; F:porin activity; C:cell outer membrane; C:pore complex	EC:7	Translocases
[BLASTED]	NCPPB2281_02903	DUF1471 domain-containing protein	70	20	5.56551e-40	94.35
[BLASTED, MAPPED, ANNOTATED]	NCPPB2281_02918	redox-sensitive transcriptional activator SoxR	162	20	2.61917e-114	96.83	4	P:GO:0006355; P:GO:0006979; F:GO:0003677; F:GO:0051537	P:regulation of transcription, DNA-templated; P:response to oxidative stress; F:DNA binding; F:2 iron, 2 sulfur cluster binding
[BLASTED, MAPPED, ANNOTATED]	NCPPB2281_02937	replicative DNA helicase	469	20	0	99.49	6	P:GO:0006269; P:GO:0032508; F:GO:0003677; F:GO:0003678; F:GO:0005524; C:GO:1990077	P:DNA replication, synthesis of RNA primer; P:DNA duplex unwinding; F:DNA binding; F:DNA helicase activity; F:ATP binding; C:primosome complex	EC:3.6.1; EC:3.6.4.12; EC:3.6; EC:3; EC:3.6.1.15	Acting on acid anhydrides; DNA helicase; Acting on acid anhydrides; Hydrolases; Nucleoside-triphosphate phosphatase
[BLASTED, MAPPED, ANNOTATED]	NCPPB2281_02946	diacylglycerol kinase	123	20	3.6452e-80	93.89	7	P:GO:0006654; P:GO:0016310; F:GO:0004143; F:GO:0005524; F:GO:0046872; C:GO:0005886; C:GO:0016021	P:phosphatidic acid biosynthetic process; P:phosphorylation; F:diacylglycerol kinase activity; F:ATP binding; F:metal ion binding; C:plasma membrane; C:integral component of membrane	EC:2.7.1; EC:2.7; EC:2; EC:2.7.1.107	Transferring phosphorus-containing groups; Transferring phosphorus-containing groups; Transferases; Diacylglycerol kinase (ATP)
[BLASTED]	NCPPB2282_01861	DUF1414 domain-containing protein	75	20	1.05476e-44	96.07
[BLASTED, MAPPED, ANNOTATED]	NCPPB2282_02189	FadR family transcriptional regulator	247	20	0	95.38	3	P:GO:0006355; F:GO:0003677; F:GO:0003700	P:regulation of transcription, DNA-templated; F:DNA binding; F:DNA-binding transcription factor activity
[BLASTED]	NCPPB2282_02672	MULTISPECIES: hypothetical protein	118	20	2.59042e-81	94.32
[BLASTED, MAPPED, ANNOTATED]	PANS_07_10_00723	RNA polymerase sigma factor FliA	241	20	7.0905e-171	99.17	6	P:GO:0001123; P:GO:2000142; F:GO:0003677; F:GO:0003899; F:GO:0016987; C:GO:0005737	P:transcription initiation from bacterial-type RNA polymerase promoter; P:regulation of DNA-templated transcription, initiation; F:DNA binding; F:DNA-directed 5'-3' RNA polymerase activity; F:sigma factor activity; C:cytoplasm	EC:2.7; EC:2; EC:2.7.7; EC:2.7.7.6	Transferring phosphorus-containing groups; Transferases; Transferring phosphorus-containing groups; DNA-directed RNA polymerase
[BLASTED, MAPPED, ANNOTATED]	PANS_07_10_00732	sodium/proline symporter PutP	495	20	0	97.69	7	P:GO:0006814; P:GO:0015824; P:GO:1903825; F:GO:0005298; F:GO:0031402; C:GO:0005886; C:GO:0016021	P:sodium ion transport; P:proline transport; P:organic acid transmembrane transport; F:proline:sodium symporter activity; F:sodium ion binding; C:plasma membrane; C:integral component of membrane	EC:7	Translocases
[BLASTED, MAPPED, ANNOTATED]	PANS_07_10_01091	MCP four helix bundle domain-containing protein	515	20	0	91.02	4	P:GO:0006935; P:GO:0007165; F:GO:0004888; C:GO:0016021	P:chemotaxis; P:signal transduction; F:transmembrane signaling receptor activity; C:integral component of membrane
[BLASTED, MAPPED, ANNOTATED]	PANS_07_10_01190	hexitol phosphatase HxpB	223	20	2.93617e-162	94.43	2	F:GO:0016787; F:GO:0046872	F:hydrolase activity; F:metal ion binding	EC:3	Hydrolases
[BLASTED, MAPPED, ANNOTATED]	PANS_07_10_01859	polysaccharide biosynthesis protein	419	20	0	96.96	2	C:GO:0005886; C:GO:0016021	C:plasma membrane; C:integral component of membrane
[BLASTED, MAPPED, ANNOTATED]	PANS_07_12_00378	5'-deoxynucleotidase	200	20	1.66675e-145	98.72	5	P:GO:0016311; F:GO:0000166; F:GO:0002953; F:GO:0046872; C:GO:0005737	P:dephosphorylation; F:nucleotide binding; F:5'-deoxynucleotidase activity; F:metal ion binding; C:cytoplasm	EC:3.1; EC:3; EC:3.1.3	Acting on ester bonds; Hydrolases; Acting on ester bonds
[BLASTED]	PANS_07_12_00463	Uncharacterised protein	214	20	6.47279e-154	98.29
[BLASTED, MAPPED, ANNOTATED]	PANS_07_12_00720	spermidine N1-acetyltransferase	182	20	2.18773e-131	98.26	1	F:GO:0004145	F:diamine N-acetyltransferase activity	EC:2.3; EC:2; EC:2.3.1; EC:2.3.1.57	Acyltransferases; Transferases; Acyltransferases; Diamine N-acetyltransferase
[BLASTED, MAPPED, ANNOTATED]	PANS_07_12_01058	cytochrome ubiquinol oxidase subunit I	454	20	0	89.87	6	P:GO:0019646; F:GO:0009055; F:GO:0046872; C:GO:0005886; C:GO:0016021; C:GO:0070069	P:aerobic electron transport chain; F:electron transfer activity; F:metal ion binding; C:plasma membrane; C:integral component of membrane; C:cytochrome complex	EC:1	Oxidoreductases
[BLASTED, MAPPED, ANNOTATED]	PANS_07_12_01070	epoxide hydrolase	386	20	0	82.9	1	F:GO:0016787	F:hydrolase activity	EC:3	Hydrolases
[BLASTED]	PANS_07_12_01072	hypothetical protein C7433_101744	194	20	3.39782e-140	88.86
[BLASTED, MAPPED, ANNOTATED]	PANS_07_12_01089	diguanylate cyclase	189	20	1.30056e-132	95.5	1	C:GO:0016021	C:integral component of membrane
[BLASTED]	PANS_07_12_01851	3-hydroxy-fatty acyl-ACP dehydratase	159	20	1.19973e-111	89.09
[BLASTED]	PANS_07_12_01862	acyl carrier protein	86	20	2.29355e-52	96.12
[BLASTED]	PANS_07_12_02071	DUF1493 family protein	106	20	5.68257e-72	92.01
[BLASTED, MAPPED, ANNOTATED]	PANS_07_14_00490	ABC transporter substrate-binding protein	304	20	0	97.08	3	P:GO:0055085; F:GO:0022857; C:GO:0043190	P:transmembrane transport; F:transmembrane transporter activity; C:ATP-binding cassette (ABC) transporter complex	EC:7	Translocases
[BLASTED, MAPPED, ANNOTATED]	PANS_07_14_00518	manganese-binding transcriptional regulator MntR	153	20	1.8574e-105	98.21	5	P:GO:0006355; F:GO:0003677; F:GO:0003700; F:GO:0046914; F:GO:0046983	P:regulation of transcription, DNA-templated; F:DNA binding; F:DNA-binding transcription factor activity; F:transition metal ion binding; F:protein dimerization activity
[BLASTED, MAPPED, ANNOTATED]	PANS_07_14_00595	tRNA uridine 5-oxyacetic acid(34) methyltransferase CmoM	264	20	0	97.15	2	P:GO:0030488; F:GO:0097697	P:tRNA methylation; F:tRNA 5-carboxymethoxyuridine methyltransferase activity	EC:2.1; EC:2; EC:2.1.1	Transferring one-carbon groups; Transferases; Transferring one-carbon groups
[BLASTED]	PANS_07_14_00621	membrane integrity-associated transporter subunit PqiC	195	20	2.19868e-138	96.08
[BLASTED, MAPPED, ANNOTATED]	PANS_07_14_00850	SDR family oxidoreductase	244	20	1.96127e-173	97.24	1	F:GO:0016491	F:oxidoreductase activity	EC:1	Oxidoreductases
[BLASTED, MAPPED, ANNOTATED]	PANS_07_14_01291	flagellar assembly protein FliH	232	20	1.69612e-164	94.63	5	P:GO:0044781; P:GO:0071973; F:GO:0003774; C:GO:0005737; C:GO:0009288	P:bacterial-type flagellum organization; P:bacterial-type flagellum-dependent cell motility; F:motor activity; C:cytoplasm; C:bacterial-type flagellum	EC:3.6.1; EC:3.6; EC:3; EC:3.6.1.15	Acting on acid anhydrides; Acting on acid anhydrides; Hydrolases; Nucleoside-triphosphate phosphatase
[BLASTED, MAPPED, ANNOTATED]	PANS_07_14_01387	YitT family protein	205	20	2.01541e-143	98.01	2	C:GO:0005886; C:GO:0016021	C:plasma membrane; C:integral component of membrane
[BLASTED, MAPPED, ANNOTATED]	PANS_07_14_01697	GNAT family N-acetyltransferase	166	20	4.8265e-119	97.69	1	F:GO:0008080	F:N-acetyltransferase activity	EC:2.3; EC:2; EC:2.3.1	Acyltransferases; Transferases; Acyltransferases
[BLASTED]	PANS_07_14_01772	acyl carrier protein	86	20	2.29355e-52	96.12
[BLASTED, MAPPED, ANNOTATED]	PANS_07_14_01798	5-dehydro-4-deoxy-D-glucuronate isomerase	279	20	0	96.9	3	P:GO:0045490; F:GO:0008270; F:GO:0008697	P:pectin catabolic process; F:zinc ion binding; F:4-deoxy-L-threo-5-hexosulose-uronate ketol-isomerase activity	EC:5.3.1.17; EC:5.3; EC:5; EC:5.3.1	5-dehydro-4-deoxy-D-glucuronate isomerase; Intramolecular oxidoreductases; Isomerases; Intramolecular oxidoreductases
[BLASTED, MAPPED, ANNOTATED]	PANS_07_14_02474	PAS domain-containing methyl-accepting chemotaxis protein	429	20	0	97.89	2	P:GO:0007165; C:GO:0016020	P:signal transduction; C:membrane
[BLASTED, MAPPED, ANNOTATED]	PANS_07_4_00133	sugar ABC transporter ATP-binding protein	495	20	0	98.63	5	P:GO:0015752; F:GO:0005524; F:GO:0015611; F:GO:0043211; C:GO:0005886	P:D-ribose transmembrane transport; F:ATP binding; F:ABC-type D-ribose transporter activity; F:ATPase-coupled carbohydrate transmembrane transporter activity; C:plasma membrane	EC:3.6.1; EC:3.6; EC:3; EC:7.2.2; EC:7; EC:3.6.1.15; EC:7.5.2.8	Acting on acid anhydrides; Acting on acid anhydrides; Hydrolases; Catalysing the translocation of inorganic cations; Translocases; Nucleoside-triphosphate phosphatase; ABC-type D-allose transporter
[BLASTED, MAPPED, ANNOTATED]	PANS_07_4_00178	EmmdR/YeeO family multidrug/toxin efflux MATE transporter	487	20	0	98.4	5	P:GO:0042908; P:GO:0055085; F:GO:0015297; F:GO:0042910; C:GO:0016021	P:xenobiotic transport; P:transmembrane transport; F:antiporter activity; F:xenobiotic transmembrane transporter activity; C:integral component of membrane	EC:7	Translocases
[BLASTED]	PANS_07_4_00194	MULTISPECIES: hypothetical protein	184	20	3.23902e-132	87.17
[BLASTED]	PANS_07_4_00213	DcrB-related protein	147	20	7.66266e-103	94.28
[BLASTED, MAPPED, ANNOTATED]	PANS_07_4_00841	DUF1656 domain-containing protein	81	20	1.77573e-48	88.72	1	C:GO:0016021	C:integral component of membrane
[BLASTED, MAPPED, ANNOTATED]	PANS_07_4_00947	stress-induced protein YchH	92	20	6.69969e-61	90.49	1	C:GO:0016021	C:integral component of membrane
[BLASTED]	PANS_07_4_01854	type IV pilus biogenesis/stability protein PilW	244	20	1.4908e-173	92.1
[BLASTED]	PANS_07_4_01968	DUF2502 domain-containing protein	117	20	1.21149e-75	87.49
[BLASTED, MAPPED, ANNOTATED]	PANS_07_4_02228	peptidoglycan-associated lipoprotein Pal	174	20	1.27561e-123	95.79	4	P:GO:0007049; P:GO:0051301; C:GO:0009279; C:GO:0016021	P:cell cycle; P:cell division; C:cell outer membrane; C:integral component of membrane
[BLASTED]	PANS_07_4_02357	lipoprotein	180	20	2.32243e-129	92.79
[BLASTED, MAPPED, ANNOTATED]	PANS_07_4_02414	cell division protein ZapC	181	20	4.6057e-132	94.72	3	P:GO:0000917; P:GO:0043093; C:GO:0005737	P:division septum assembly; P:FtsZ-dependent cytokinesis; C:cytoplasm
[BLASTED, MAPPED, ANNOTATED]	PANS_07_4_02439	succinate-semialdehyde dehydrogenase	458	20	0	98.95	2	F:GO:0004030; F:GO:0004777	F:aldehyde dehydrogenase [NAD(P)+] activity; F:succinate-semialdehyde dehydrogenase (NAD+) activity	EC:1.2.1.16; EC:1.2; EC:1.2.1.24; EC:1; EC:1.2.1.5; EC:1.2.1	Succinate-semialdehyde dehydrogenase (NAD(P)(+)); Acting on the aldehyde or oxo group of donors; Succinate-semialdehyde dehydrogenase (NAD(+)); Oxidoreductases; Aldehyde dehydrogenase (NAD(P)(+)); Acting on the aldehyde or oxo group of donors
[BLASTED]	PANS_07_4_02440	YccJ family protein	77	20	1.8162e-48	98.03
[BLASTED, MAPPED, ANNOTATED]	PANS_07_4_03216	anaerobic ribonucleoside-triphosphate reductase-activating protein	156	20	4.38295e-112	95.26	3	F:GO:0043365; F:GO:0046872; F:GO:0051539	F:[formate-C-acetyltransferase]-activating enzyme activity; F:metal ion binding; F:4 iron, 4 sulfur cluster binding	EC:1.97.1; EC:1; EC:1.97.1.4	Other oxidoreductases; Oxidoreductases; [Formate-C-acetyltransferase]-activating enzyme
[BLASTED, MAPPED, ANNOTATED]	PANS_07_6_00275	glycosyl transferase	394	20	0	95.27	1	F:GO:0016757	F:transferase activity, transferring glycosyl groups	EC:2.4; EC:2	Glycosyltransferases; Transferases
[BLASTED, MAPPED, ANNOTATED]	PANS_99_15_00021	flagella biosynthesis regulatory protein FliZ	168	20	8.089e-123	99.07	2	P:GO:0015074; F:GO:0003677	P:DNA integration; F:DNA binding
[BLASTED, MAPPED, ANNOTATED]	PANS_99_15_00796	ABC transporter ATP-binding protein	622	20	0	99.61	4	P:GO:0015833; P:GO:0055085; F:GO:0005524; F:GO:0042626	P:peptide transport; P:transmembrane transport; F:ATP binding; F:ATPase-coupled transmembrane transporter activity	EC:3.6.1; EC:3.6; EC:3; EC:7; EC:7.2.2; EC:3.6.1.15	Acting on acid anhydrides; Acting on acid anhydrides; Hydrolases; Translocases; Catalysing the translocation of inorganic cations; Nucleoside-triphosphate phosphatase
[BLASTED]	PANS_99_15_00798	DUF1611 domain-containing protein	336	20	0	98.34
[BLASTED, MAPPED, ANNOTATED]	PANS_99_15_00955	chemotaxis protein	515	20	0	95.84	4	P:GO:0006935; P:GO:0007165; F:GO:0004888; C:GO:0016021	P:chemotaxis; P:signal transduction; F:transmembrane signaling receptor activity; C:integral component of membrane
[BLASTED]	PANS_99_15_00969	baseplate assembly protein	303	20	0	98.69
[BLASTED, MAPPED, ANNOTATED]	PANS_99_15_01370	GNAT family N-acetyltransferase	173	20	2.07726e-121	90.35	2	F:GO:0008080; C:GO:0005840	F:N-acetyltransferase activity; C:ribosome	EC:2.3; EC:2; EC:2.3.1	Acyltransferases; Transferases; Acyltransferases
[BLASTED, MAPPED, ANNOTATED]	PANS_99_15_01595	metal-dependent hydrolase	264	20	0	98.1	2	P:GO:0006259; F:GO:0016888	P:DNA metabolic process; F:endodeoxyribonuclease activity, producing 5'-phosphomonoesters	EC:3.1.30; EC:3.1; EC:3.1.21; EC:3	Acting on ester bonds; Acting on ester bonds; Acting on ester bonds; Hydrolases
[BLASTED, MAPPED, ANNOTATED]	PANS_99_15_03254	Obg family GTPase CgtA	391	20	0	98.32	5	P:GO:0042254; F:GO:0000287; F:GO:0003924; F:GO:0005525; C:GO:0005737	P:ribosome biogenesis; F:magnesium ion binding; F:GTPase activity; F:GTP binding; C:cytoplasm	EC:3.6.1; EC:3.6; EC:3; EC:3.6.1.15	Acting on acid anhydrides; Acting on acid anhydrides; Hydrolases; Nucleoside-triphosphate phosphatase
[BLASTED, MAPPED, ANNOTATED]	PANS_99_15_03275	RNase adapter RapZ	285	20	0	98.77	3	F:GO:0003723; F:GO:0005524; F:GO:0005525	F:RNA binding; F:ATP binding; F:GTP binding
[BLASTED, MAPPED, ANNOTATED]	PANS_99_15_03276	PTS phosphocarrier protein NPr	91	20	1.18139e-56	98.5	1	F:GO:0016740	F:transferase activity	EC:2	Transferases
[BLASTED, MAPPED, ANNOTATED]	PANS_99_15_04017	HAMP domain-containing histidine kinase	362	20	0	94.75	5	P:GO:0000160; P:GO:0018106; F:GO:0000155; C:GO:0005886; C:GO:0016021	P:phosphorelay signal transduction system; P:peptidyl-histidine phosphorylation; F:phosphorelay sensor kinase activity; C:plasma membrane; C:integral component of membrane	EC:2.7.1; EC:2.7; EC:2.7.3; EC:2; EC:2.7.13.3	Transferring phosphorus-containing groups; Transferring phosphorus-containing groups; Transferring phosphorus-containing groups; Transferases; Histidine kinase
[BLASTED, MAPPED, ANNOTATED]	PANS_99_15_04022	hydroxyacid dehydrogenase	320	20	0	97.63	2	F:GO:0016616; F:GO:0051287	F:oxidoreductase activity, acting on the CH-OH group of donors, NAD or NADP as acceptor; F:NAD binding	EC:1.1; EC:1; EC:1.1.1	Acting on the CH-OH group of donors; Oxidoreductases; Acting on the CH-OH group of donors
[BLASTED, MAPPED, ANNOTATED]	PANS_99_15_04030	ATP-dependent Clp protease proteolytic subunit	223	20	2.9257e-164	92.79	2	P:GO:0006508; F:GO:0008233	P:proteolysis; F:peptidase activity	EC:3.4; EC:3	Acting on peptide bonds (peptidases); Hydrolases
[BLASTED]	PANS_99_15_04152	helix-turn-helix transcriptional regulator	127	20	7.29774e-88	91.66
[BLASTED, MAPPED, ANNOTATED]	PNA_03_3_00024	molecular chaperone	247	20	0	86.21	3	P:GO:0061077; P:GO:0071555; C:GO:0030288	P:chaperone-mediated protein folding; P:cell wall organization; C:outer membrane-bounded periplasmic space
[BLASTED, MAPPED, ANNOTATED]	PNA_03_3_00029	fimbrial protein	284	20	0	68.23	2	P:GO:0007155; C:GO:0009289	P:cell adhesion; C:pilus
[BLASTED]	PNA_03_3_00048	ABC transporter substrate-binding protein	365	20	0	95.49
[BLASTED, MAPPED, ANNOTATED]	PNA_03_3_00055	cold-shock protein	70	20	8.10752e-42	99.64	3	F:GO:0003677; C:GO:0005737; C:GO:0016021	F:DNA binding; C:cytoplasm; C:integral component of membrane
[BLASTED, MAPPED, ANNOTATED]	PNA_03_3_00062	D-alanyl-D-alanine carboxypeptidase (penicillin-binding protein 5/6)	411	20	0	99.3	5	P:GO:0006508; P:GO:0008360; P:GO:0009252; P:GO:0071555; F:GO:0009002	P:proteolysis; P:regulation of cell shape; P:peptidoglycan biosynthetic process; P:cell wall organization; F:serine-type D-Ala-D-Ala carboxypeptidase activity	EC:3.4.17.11; EC:3.4.21; EC:3.4; EC:3.4.16; EC:3; EC:3.4.16.2; EC:3.4.16.6; EC:3.4.16.5; EC:3.4.16.4	Glutamate carboxypeptidase; Acting on peptide bonds (peptidases); Acting on peptide bonds (peptidases); Acting on peptide bonds (peptidases); Hydrolases; Lysosomal Pro-Xaa carboxypeptidase; Carboxypeptidase D; Carboxypeptidase C; Serine-type D-Ala-D-Ala carboxypeptidase
[BLASTED, MAPPED, ANNOTATED]	PNA_03_3_00066	23S rRNA (pseudouridine(1915)-N(3))-methyltransferase RlmH	146	20	5.8632e-103	98.86	3	P:GO:0031167; F:GO:0070038; C:GO:0005737	P:rRNA methylation; F:rRNA (pseudouridine-N3-)-methyltransferase activity; C:cytoplasm	EC:2.1; EC:2; EC:2.1.1	Transferring one-carbon groups; Transferases; Transferring one-carbon groups
[BLASTED, MAPPED, ANNOTATED]	PNA_03_3_00067	ribosome silencing factor	106	20	5.02778e-69	99	4	P:GO:0017148; P:GO:0042256; P:GO:0090071; C:GO:0005737	P:negative regulation of translation; P:mature ribosome assembly; P:negative regulation of ribosome biogenesis; C:cytoplasm
[BLASTED, MAPPED, ANNOTATED]	PNA_03_3_00095	replication initiation negative regulator SeqA	184	20	7.84627e-134	94.89	4	P:GO:0006355; P:GO:0032297; F:GO:0003677; C:GO:0005737	P:regulation of transcription, DNA-templated; P:negative regulation of DNA-dependent DNA replication initiation; F:DNA binding; C:cytoplasm
[BLASTED, MAPPED, ANNOTATED]	PNA_03_3_00099	carboxymuconolactone decarboxylase family protein	157	20	3.97065e-110	90.07	3	P:GO:0098869; F:GO:0004601; F:GO:0051920	P:cellular oxidant detoxification; F:peroxidase activity; F:peroxiredoxin activity	EC:1.11; EC:1; EC:1.11.1; EC:1.11.1.15	Acting on a peroxide as acceptor; Oxidoreductases; Acting on a peroxide as acceptor; Acting on a peroxide as acceptor
[BLASTED, MAPPED, ANNOTATED]	PNA_03_3_00111	GNAT family N-acetyltransferase	196	20	9.57947e-143	90.84	1	F:GO:0008080	F:N-acetyltransferase activity	EC:2.3; EC:2; EC:2.3.1	Acyltransferases; Transferases; Acyltransferases
[BLASTED, MAPPED, ANNOTATED]	PNA_03_3_00112	citrate synthase	428	20	0	98.22	3	P:GO:0006099; F:GO:0004108; C:GO:0005737	P:tricarboxylic acid cycle; F:citrate (Si)-synthase activity; C:cytoplasm	EC:2.3.3.1; EC:2.3.3; EC:2.3; EC:2	Citrate (Si)-synthase; Acyltransferases; Acyltransferases; Transferases
[BLASTED, MAPPED, ANNOTATED]	PNA_03_3_00114	succinate dehydrogenase membrane anchor subunit	116	20	1.9848e-72	97.04	8	P:GO:0006099; P:GO:0022900; F:GO:0000104; F:GO:0009055; F:GO:0020037; F:GO:0046872; C:GO:0005886; C:GO:0016021	P:tricarboxylic acid cycle; P:electron transport chain; F:succinate dehydrogenase activity; F:electron transfer activity; F:heme binding; F:metal ion binding; C:plasma membrane; C:integral component of membrane	EC:1.3; EC:1	Acting on the CH-CH group of donors; Oxidoreductases
[BLASTED, MAPPED, ANNOTATED]	PNA_03_3_00115	succinate dehydrogenase flavoprotein subunit	589	20	0	99.22	5	P:GO:0006099; P:GO:0022900; F:GO:0008177; F:GO:0050660; C:GO:0005886	P:tricarboxylic acid cycle; P:electron transport chain; F:succinate dehydrogenase (ubiquinone) activity; F:flavin adenine dinucleotide binding; C:plasma membrane	EC:1.3.5; EC:1.3; EC:1; EC:1.3.5.1	Acting on the CH-CH group of donors; Acting on the CH-CH group of donors; Oxidoreductases; Succinate dehydrogenase (quinone)
[BLASTED, MAPPED, ANNOTATED]	PNA_03_3_00116	succinate dehydrogenase iron-sulfur subunit	239	20	5.57228e-177	99.05	8	P:GO:0006099; P:GO:0022900; F:GO:0008177; F:GO:0009055; F:GO:0046872; F:GO:0051537; F:GO:0051538; F:GO:0051539	P:tricarboxylic acid cycle; P:electron transport chain; F:succinate dehydrogenase (ubiquinone) activity; F:electron transfer activity; F:metal ion binding; F:2 iron, 2 sulfur cluster binding; F:3 iron, 4 sulfur cluster binding; F:4 iron, 4 sulfur cluster binding	EC:1.3.5; EC:1.3; EC:1; EC:1.3.5.1	Acting on the CH-CH group of donors; Acting on the CH-CH group of donors; Oxidoreductases; Succinate dehydrogenase (quinone)
[BLASTED, MAPPED, ANNOTATED]	PNA_03_3_00124	cyd operon protein YbgE	98	20	1.73141e-61	86.04	1	C:GO:0016021	C:integral component of membrane
[BLASTED, MAPPED, ANNOTATED]	PNA_03_3_00125	tol-pal system-associated acyl-CoA thioesterase	135	20	1.17372e-94	99.03	1	F:GO:0047617	F:acyl-CoA hydrolase activity	EC:3.1; EC:3; EC:3.1.2.20; EC:3.1.2	Acting on ester bonds; Hydrolases; Acyl-CoA hydrolase; Acting on ester bonds
[BLASTED, MAPPED, ANNOTATED]	PNA_03_3_00134	methylated-DNA--[protein]-cysteine S-methyltransferase	170	20	4.3418e-121	93.93	4	P:GO:0006307; P:GO:0032259; F:GO:0003908; C:GO:0005737	P:DNA dealkylation involved in DNA repair; P:methylation; F:methylated-DNA-[protein]-cysteine S-methyltransferase activity; C:cytoplasm	EC:2.1; EC:2; EC:2.1.1.63; EC:2.1.1	Transferring one-carbon groups; Transferases; Methylated-DNA--[protein]-cysteine S-methyltransferase; Transferring one-carbon groups
[BLASTED, MAPPED, ANNOTATED]	PNA_03_3_00165	cyclic pyranopterin monophosphate synthase MoaC	162	20	2.70684e-114	96.74	2	P:GO:0006777; F:GO:0061799	P:Mo-molybdopterin cofactor biosynthetic process; F:cyclic pyranopterin monophosphate synthase activity	EC:4; EC:4.6; EC:4.6.1.17	Lyases; Phosphorus-oxygen lyases; Cyclic pyranopterin monophosphate synthase
[BLASTED, MAPPED, ANNOTATED]	PNA_03_3_00166	molybdopterin synthase sulfur carrier subunit	82	20	4.59138e-51	92.53	2	P:GO:0006777; F:GO:0061799	P:Mo-molybdopterin cofactor biosynthetic process; F:cyclic pyranopterin monophosphate synthase activity	EC:4; EC:4.6; EC:4.6.1.17	Lyases; Phosphorus-oxygen lyases; Cyclic pyranopterin monophosphate synthase
[BLASTED, MAPPED, ANNOTATED]	PNA_03_3_00167	molybdopterin synthase catalytic subunit MoaE	151	20	2.2088e-107	96.37	2	P:GO:0006777; F:GO:0030366	P:Mo-molybdopterin cofactor biosynthetic process; F:molybdopterin synthase activity	EC:2.8.1; EC:2; EC:2.8.1.12; EC:2.8	Transferring sulfur-containing groups; Transferases; Molybdopterin synthase; Transferring sulfur-containing groups
[BLASTED, MAPPED, ANNOTATED]	PNA_03_3_00174	YbhQ family protein	131	20	1.7184e-88	95.23	1	C:GO:0016021	C:integral component of membrane
[BLASTED, MAPPED, ANNOTATED]	PNA_03_3_00183	DedA family protein	193	20	7.75311e-133	95.34	1	C:GO:0016021	C:integral component of membrane
[BLASTED, MAPPED, ANNOTATED]	PNA_03_3_00191	isopentenyl-diphosphate delta-isomerase	178	20	1.29617e-130	96.43	6	P:GO:0008299; P:GO:0050992; F:GO:0004452; F:GO:0016787; F:GO:0046872; C:GO:0005737	P:isoprenoid biosynthetic process; P:dimethylallyl diphosphate biosynthetic process; F:isopentenyl-diphosphate delta-isomerase activity; F:hydrolase activity; F:metal ion binding; C:cytoplasm	EC:5.3.3.2; EC:5.3; EC:3; EC:5; EC:5.3.3	Isopentenyl-diphosphate Delta-isomerase; Intramolecular oxidoreductases; Hydrolases; Isomerases; Intramolecular oxidoreductases
[BLASTED, MAPPED, ANNOTATED]	PNA_03_3_00192	ABC transporter substrate-binding protein	304	20	0	97.08	3	P:GO:0055085; F:GO:0022857; C:GO:0043190	P:transmembrane transport; F:transmembrane transporter activity; C:ATP-binding cassette (ABC) transporter complex	EC:7	Translocases
[BLASTED]	PNA_03_3_00247	YbjN domain-containing protein	160	20	3.87002e-112	98.27
[BLASTED, MAPPED, ANNOTATED]	PNA_03_3_00250	putrescine ABC transporter permease PotH	321	20	0	98.61	3	P:GO:0055085; C:GO:0005886; C:GO:0016021	P:transmembrane transport; C:plasma membrane; C:integral component of membrane
[BLASTED, MAPPED, ANNOTATED]	PNA_03_3_00258	arginine ABC transporter ATP-binding protein ArtP	243	20	9.63826e-179	99.4	5	P:GO:0003333; F:GO:0005524; F:GO:0015424; F:GO:0042626; C:GO:0016020	P:amino acid transmembrane transport; F:ATP binding; F:ATPase-coupled amino acid transmembrane transporter activity; F:ATPase-coupled transmembrane transporter activity; C:membrane	EC:3.6.1; EC:3.6; EC:3; EC:7.2.2; EC:7; EC:3.6.1.15	Acting on acid anhydrides; Acting on acid anhydrides; Hydrolases; Catalysing the translocation of inorganic cations; Translocases; Nucleoside-triphosphate phosphatase
[BLASTED]	PNA_03_3_00259	lipoprotein	180	20	2.32243e-129	92.79
[BLASTED, MAPPED, ANNOTATED]	PNA_03_3_00261	N-acetylmuramoyl-L-alanine amidase	267	20	0	94.46	2	P:GO:0009253; F:GO:0008745	P:peptidoglycan catabolic process; F:N-acetylmuramoyl-L-alanine amidase activity	EC:3.5.1; EC:3.5; EC:3; EC:3.5.1.28	Acting on carbon-nitrogen bonds, other than peptide bonds; Acting on carbon-nitrogen bonds, other than peptide bonds; Hydrolases; N-acetylmuramoyl-L-alanine amidase
[BLASTED, MAPPED, ANNOTATED]	PNA_03_3_00266	Cold shock-like protein CspD	75	20	2.34861e-48	96.14	3	P:GO:0006355; F:GO:0003677; C:GO:0005737	P:regulation of transcription, DNA-templated; F:DNA binding; C:cytoplasm
[BLASTED, MAPPED, ANNOTATED]	PNA_03_3_00267	ATP-dependent Clp protease adapter ClpS	107	20	2.91271e-74	96.08	3	P:GO:0006508; P:GO:0030163; F:GO:0008233	P:proteolysis; P:protein catabolic process; F:peptidase activity	EC:3.4; EC:3	Acting on peptide bonds (peptidases); Hydrolases
[BLASTED, MAPPED, ANNOTATED]	PNA_03_3_00269	translation initiation factor IF-1	73	20	2.1248e-45	99.72	7	P:GO:0006413; F:GO:0003743; F:GO:0005515; F:GO:0016787; F:GO:0019843; F:GO:0043022; C:GO:0005829	P:translational initiation; F:translation initiation factor activity; F:protein binding; F:hydrolase activity; F:rRNA binding; F:ribosome binding; C:cytosol	EC:3	Hydrolases
[BLASTED, MAPPED, ANNOTATED]	PNA_03_3_00274	leucine-responsive transcriptional regulator Lrp	165	20	6.83455e-116	99.6	1	F:GO:0043565	F:sequence-specific DNA binding
[BLASTED, MAPPED, ANNOTATED]	PNA_03_3_00276	outer membrane lipoprotein chaperone LolA	204	20	4.03966e-147	97.31	3	P:GO:0042953; P:GO:0044874; C:GO:0042597	P:lipoprotein transport; P:lipoprotein localization to outer membrane; C:periplasmic space
[BLASTED, MAPPED, ANNOTATED]	PNA_03_3_00287	30S ribosomal protein S1	570	20	0	99.65	4	P:GO:0006412; F:GO:0003723; F:GO:0003735; C:GO:0005840	P:translation; F:RNA binding; F:structural constituent of ribosome; C:ribosome
[BLASTED, MAPPED, ANNOTATED]	PNA_03_3_00288	integration host factor subunit beta	95	20	7.58109e-63	99.57	5	P:GO:0006310; P:GO:0006355; P:GO:0006417; F:GO:0003677; C:GO:0005694	P:DNA recombination; P:regulation of transcription, DNA-templated; P:regulation of translation; F:DNA binding; C:chromosome
[BLASTED, MAPPED, ANNOTATED]	PNA_03_3_00323	bifunctional 3-hydroxydecanoyl-ACP dehydratase/trans-2-decenoyl-ACP isomerase	173	20	7.58384e-121	98.14	7	P:GO:0006633; F:GO:0004317; F:GO:0008659; F:GO:0008693; F:GO:0034017; F:GO:0047451; C:GO:0005737	P:fatty acid biosynthetic process; F:3-hydroxypalmitoyl-[acyl-carrier-protein] dehydratase activity; F:(3R)-hydroxymyristoyl-[acyl-carrier-protein] dehydratase activity; F:3-hydroxydecanoyl-[acyl-carrier-protein] dehydratase activity; F:trans-2-decenoyl-acyl-carrier-protein isomerase activity; F:3-hydroxyoctanoyl-[acyl-carrier-protein] dehydratase activity; C:cytoplasm	EC:4.2.1; EC:5.3.3.14; EC:5.3.3; EC:2.3.1.85; EC:2.3; EC:4.2; EC:2; EC:5.3; EC:4; EC:4.2.1.59; EC:5; EC:2.3.1	Carbon-oxygen lyases; Trans-2-decenoyl-[acyl-carrier-protein] isomerase; Intramolecular oxidoreductases; Fatty-acid synthase system; Acyltransferases; Carbon-oxygen lyases; Transferases; Intramolecular oxidoreductases; Lyases; 3-hydroxyacyl-[acyl-carrier-protein] dehydratase; Isomerases; Acyltransferases
[BLASTED, MAPPED, ANNOTATED]	PNA_03_3_00351	autoinducer synthase	204	20	1.01546e-146	97.43	2	P:GO:0009372; F:GO:0061579	P:quorum sensing; F:N-acyl homoserine lactone synthase activity	EC:2.3; EC:2.3.1.184; EC:2; EC:2.3.1	Acyltransferases; Acyl-homoserine-lactone synthase; Transferases; Acyltransferases
[BLASTED, MAPPED, ANNOTATED]	PNA_03_3_01147	carboxy terminal-processing peptidase	682	20	0	99.02	2	P:GO:0006508; F:GO:0004252	P:proteolysis; F:serine-type endopeptidase activity	EC:3.4.21.73; EC:3.4.24.7; EC:3.4.21.71; EC:3.4.24.3; EC:3.4.21.34; EC:3.4.21.78; EC:3.4.21.75; EC:3.4.21.26; EC:3.4.21.27; EC:3.4.21.68; EC:3.4.21.69; EC:3.4.24.34; EC:3.4.21.41; EC:3.4.21.83; EC:3.4.21.88; EC:3.4.21.45; EC:3.4.21.89; EC:3.4.21.42; EC:3.4.19.1; EC:3.4.21.43; EC:3.4.21.87; EC:3.4.21.38; EC:3.4.21.35; EC:3.4.21.79; EC:3.4.21.36; EC:3.4.21.102; EC:3.4.21.39; EC:3.4.21; EC:3.4.21.4;…	U-plasminogen activator; Interstitial collagenase; Pancreatic elastase II; Microbial collagenase; Plasma kallikrein; Granzyme A; Furin; Prolyl oligopeptidase; Coagulation factor XIa; T-plasminogen activator; Protein C (activated); Neutrophil collagenase; Complement subcomponent C1r; Oligopeptidase B; Repressor LexA; Complement factor I; Signal peptidase I; Complement subcomponent C1s; Acylaminoac…
[BLASTED, MAPPED, ANNOTATED]	PNA_03_3_01386	Lrp/AsnC family transcriptional regulator	172	20	9.08725e-124	99.32	1	F:GO:0043565	F:sequence-specific DNA binding
[BLASTED]	PNA_03_3_01420	sarcosine oxidase subunit gamma	225	20	4.70978e-162	89.13
[BLASTED, MAPPED, ANNOTATED]	PNA_03_3_01463	DeoR/GlpR transcriptional regulator	256	20	0	98.51	3	P:GO:0006355; F:GO:0003677; F:GO:0003700	P:regulation of transcription, DNA-templated; F:DNA binding; F:DNA-binding transcription factor activity
[BLASTED, MAPPED, ANNOTATED]	PNA_03_3_01485	glycosyltransferase	248	20	1.65275e-179	85.95	1	F:GO:0016740	F:transferase activity	EC:2	Transferases
[BLASTED, MAPPED, ANNOTATED]	PNA_03_3_01508	EpsG family protein	379	20	0	97.71	1	C:GO:0016021	C:integral component of membrane
[BLASTED, MAPPED, ANNOTATED]	PNA_03_3_01510	protein tyrosine phosphatase	145	20	7.13229e-102	95.42	2	P:GO:0035335; F:GO:0004725	P:peptidyl-tyrosine dephosphorylation; F:protein tyrosine phosphatase activity	EC:3.1; EC:3.1.3.48; EC:3; EC:3.1.3	Acting on ester bonds; Protein-tyrosine-phosphatase; Hydrolases; Acting on ester bonds
[BLASTED, MAPPED, ANNOTATED]	PNA_03_3_01525	two-component system response regulator BaeR	236	20	7.80887e-171	97.12	3	P:GO:0000160; P:GO:0006355; F:GO:0003677	P:phosphorelay signal transduction system; P:regulation of transcription, DNA-templated; F:DNA binding
[BLASTED, MAPPED, ANNOTATED]	PNA_03_3_01542	NAD-dependent malic enzyme	566	20	0	99.28	4	F:GO:0004471; F:GO:0008948; F:GO:0046872; F:GO:0051287	F:malate dehydrogenase (decarboxylating) (NAD+) activity; F:oxaloacetate decarboxylase activity; F:metal ion binding; F:NAD binding	EC:4.1.1; EC:1.1; EC:4.1; EC:1; EC:4.1.1.112; EC:1.1.1; EC:4; EC:1.1.1.38; EC:1.1.1.39; EC:1.1.1.40	Carbon-carbon lyases; Acting on the CH-OH group of donors; Carbon-carbon lyases; Oxidoreductases; Oxaloacetate decarboxylase; Acting on the CH-OH group of donors; Lyases; Malate dehydrogenase (oxaloacetate-decarboxylating); Malate dehydrogenase (decarboxylating); Malate dehydrogenase (oxaloacetate-decarboxylating) (NADP(+))
[BLASTED, MAPPED, ANNOTATED]	PNA_03_3_01609	stress response protein ElaB	104	20	1.56702e-67	95.39	3	F:GO:0043022; C:GO:0005886; C:GO:0016021	F:ribosome binding; C:plasma membrane; C:integral component of membrane
[BLASTED, MAPPED, ANNOTATED]	PNA_03_3_01618	NADH-quinone oxidoreductase subunit NuoI	181	20	5.95498e-131	99.47	5	F:GO:0005506; F:GO:0048038; F:GO:0050136; F:GO:0051539; C:GO:0005886	F:iron ion binding; F:quinone binding; F:NADH dehydrogenase (quinone) activity; F:4 iron, 4 sulfur cluster binding; C:plasma membrane	EC:1.6; EC:1; EC:1.6.5.11; EC:1.6.5; EC:1.6.99.3; EC:1.6.5.2	Acting on NADH or NADPH; Oxidoreductases; NADH dehydrogenase (quinone); Acting on NADH or NADPH; NADH dehydrogenase; NAD(P)H dehydrogenase (quinone)
[BLASTED, MAPPED, ANNOTATED]	PNA_03_3_01624	NADH-quinone oxidoreductase subunit B	226	20	1.08329e-168	99.73	6	P:GO:0022900; F:GO:0005506; F:GO:0008137; F:GO:0048038; F:GO:0051539; C:GO:0005886	P:electron transport chain; F:iron ion binding; F:NADH dehydrogenase (ubiquinone) activity; F:quinone binding; F:4 iron, 4 sulfur cluster binding; C:plasma membrane	EC:7.1.1.2; EC:1.6; EC:1; EC:1.6.5.11; EC:1.6.5; EC:1.6.99.3; EC:1.6.5.2	NADH:ubiquinone reductase (H(+)-translocating); Acting on NADH or NADPH; Oxidoreductases; NADH dehydrogenase (quinone); Acting on NADH or NADPH; NADH dehydrogenase; NAD(P)H dehydrogenase (quinone)
[BLASTED, MAPPED, ANNOTATED]	PNA_03_3_01629	5'-deoxynucleotidase	200	20	1.66675e-145	98.72	5	P:GO:0016311; F:GO:0000166; F:GO:0002953; F:GO:0046872; C:GO:0005737	P:dephosphorylation; F:nucleotide binding; F:5'-deoxynucleotidase activity; F:metal ion binding; C:cytoplasm	EC:3.1; EC:3; EC:3.1.3	Acting on ester bonds; Hydrolases; Acting on ester bonds
[BLASTED, MAPPED, ANNOTATED]	PNA_03_3_01641	NUDIX hydrolase YfcD	175	20	2.73117e-126	97.33	3	F:GO:0016817; F:GO:0016853; F:GO:0046872	F:hydrolase activity, acting on acid anhydrides; F:isomerase activity; F:metal ion binding	EC:3.6; EC:3; EC:5	Acting on acid anhydrides; Hydrolases; Isomerases
[BLASTED, MAPPED, ANNOTATED]	PNA_03_3_01652	UbiX family flavin prenyltransferase	190	20	8.7422e-134	97.35	2	F:GO:0016829; F:GO:0106141	F:lyase activity; F:flavin prenyltransferase activity	EC:2.5.1; EC:2.5; EC:2; EC:4; EC:2.5.1.129	Transferring alkyl or aryl groups, other than methyl groups; Transferring alkyl or aryl groups, other than methyl groups; Transferases; Lyases; Flavin prenyltransferase
[BLASTED, MAPPED, ANNOTATED]	PNA_03_3_01655	cell division protein DedD	260	20	0	93.19	4	P:GO:0032506; F:GO:0042834; C:GO:0005887; C:GO:0030428	P:cytokinetic process; F:peptidoglycan binding; C:integral component of plasma membrane; C:cell septum
[BLASTED, MAPPED, ANNOTATED]	PNA_03_3_01664	transcriptional regulator TctD	224	20	4.7978e-157	98.48	3	P:GO:0000160; P:GO:0006355; F:GO:0003677	P:phosphorelay signal transduction system; P:regulation of transcription, DNA-templated; F:DNA binding
[BLASTED, MAPPED, ANNOTATED]	PNA_03_3_01678	50S ribosomal protein L3 N(5)-glutamine methyltransferase	311	20	0	98.4	6	P:GO:0018364; P:GO:0032775; F:GO:0003676; F:GO:0009007; F:GO:0036009; C:GO:0005840	P:peptidyl-glutamine methylation; P:DNA methylation on adenine; F:nucleic acid binding; F:site-specific DNA-methyltransferase (adenine-specific) activity; F:protein-glutamine N-methyltransferase activity; C:ribosome	EC:2.1; EC:2; EC:2.1.1.72; EC:2.1.1	Transferring one-carbon groups; Transferases; Site-specific DNA-methyltransferase (adenine-specific); Transferring one-carbon groups
[BLASTED, MAPPED, ANNOTATED]	PNA_03_3_01680	HAMP domain-containing protein	607	20	0	96.16	4	P:GO:0006935; P:GO:0007165; F:GO:0004888; C:GO:0016021	P:chemotaxis; P:signal transduction; F:transmembrane signaling receptor activity; C:integral component of membrane
[BLASTED, MAPPED, ANNOTATED]	PNA_03_3_01683	acetyl-CoA C-acyltransferase FadI	437	20	0	98.13	3	P:GO:0006635; F:GO:0003988; C:GO:0005737	P:fatty acid beta-oxidation; F:acetyl-CoA C-acyltransferase activity; C:cytoplasm	EC:2.3; EC:2; EC:2.3.1.16; EC:2.3.1	Acyltransferases; Transferases; Acetyl-CoA C-acyltransferase; Acyltransferases
[BLASTED]	PNA_03_3_01684	YfcZ/YiiS family protein	99	20	7.43972e-64	92.91
[BLASTED, MAPPED, ANNOTATED]	PNA_03_3_01686	phospholipid-binding lipoprotein MlaA	255	20	0	96.65	1	C:GO:0016020	C:membrane
[BLASTED, MAPPED, ANNOTATED]	PNA_03_3_01726	sugar ABC transporter permease	304	20	0	97.48	3	P:GO:0055085; C:GO:0005886; C:GO:0016021	P:transmembrane transport; C:plasma membrane; C:integral component of membrane
[BLASTED]	PNA_03_3_01732	hypothetical protein C7433_103203	85	1	1.24179e-53	100
[BLASTED]	PNA_03_3_01733	DUF2767 family protein	80	20	1.75277e-50	94.9
[BLASTED]	PNA_03_3_01737	membrane lipoprotein lipid attachment site-containing protein	94	20	2.22485e-63	91.12
[BLASTED, MAPPED, ANNOTATED]	PNA_03_3_01747	glucokinase	322	20	0	97.71	7	P:GO:0006096; P:GO:0051156; F:GO:0004340; F:GO:0005524; F:GO:0005536; C:GO:0005737; C:GO:0016021	P:glycolytic process; P:glucose 6-phosphate metabolic process; F:glucokinase activity; F:ATP binding; F:glucose binding; C:cytoplasm; C:integral component of membrane	EC:2.7.1; EC:2.7; EC:2; EC:2.7.1.2; EC:2.7.1.1	Transferring phosphorus-containing groups; Transferring phosphorus-containing groups; Transferases; Glucokinase; Hexokinase
[BLASTED, MAPPED, ANNOTATED]	PNA_03_3_01752	Nramp family divalent metal transporter	414	20	0	97.44	7	P:GO:0030001; P:GO:0055085; F:GO:0015293; F:GO:0046872; F:GO:0046873; C:GO:0005886; C:GO:0016021	P:metal ion transport; P:transmembrane transport; F:symporter activity; F:metal ion binding; F:metal ion transmembrane transporter activity; C:plasma membrane; C:integral component of membrane	EC:7	Translocases
[BLASTED, MAPPED, ANNOTATED]	PNA_03_3_01759	formate/nitrite transporter family protein	263	20	0	96.74	3	P:GO:0055085; F:GO:0022857; C:GO:0016021	P:transmembrane transport; F:transmembrane transporter activity; C:integral component of membrane	EC:7	Translocases
[BLASTED, MAPPED, ANNOTATED]	PNA_03_3_01770	phosphocarrier protein Hpr	86	20	6.70449e-53	99.12	3	P:GO:0009401; F:GO:0016740; C:GO:0005737	P:phosphoenolpyruvate-dependent sugar phosphotransferase system; F:transferase activity; C:cytoplasm	EC:2	Transferases
[BLASTED, MAPPED, ANNOTATED]	PNA_03_3_01772	PTS glucose transporter subunit IIA	167	20	3.45562e-110	98.62	4	P:GO:0009401; P:GO:0034219; F:GO:0008982; F:GO:0103111	P:phosphoenolpyruvate-dependent sugar phosphotransferase system; P:carbohydrate transmembrane transport; F:protein-N(PI)-phosphohistidine-sugar phosphotransferase activity; F:D-glucosamine PTS permease activity	EC:2.7.1; EC:2.7; EC:2; EC:7; EC:2.7.1.69	Transferring phosphorus-containing groups; Transferring phosphorus-containing groups; Transferases; Translocases; Transferring phosphorus-containing groups
[BLASTED, MAPPED, ANNOTATED]	PNA_03_3_01797	ABC transporter permease	330	20	0	96.75	4	P:GO:0055085; F:GO:0022857; C:GO:0005886; C:GO:0016021	P:transmembrane transport; F:transmembrane transporter activity; C:plasma membrane; C:integral component of membrane	EC:7	Translocases
[BLASTED]	PNA_03_3_01809	ArsC family reductase	123	20	7.02582e-85	93.23
[BLASTED, MAPPED, ANNOTATED]	PNA_03_3_01818	glycine cleavage system transcriptional repressor	205	20	1.18685e-149	95.97	1	C:GO:0016021	C:integral component of membrane
[BLASTED, MAPPED, ANNOTATED]	PNA_03_3_01819	thioredoxin-dependent thiol peroxidase	156	20	3.36791e-112	98.61	3	P:GO:0098869; F:GO:0004601; F:GO:0051920	P:cellular oxidant detoxification; F:peroxidase activity; F:peroxiredoxin activity	EC:1.11; EC:1; EC:1.11.1; EC:1.11.1.15	Acting on a peroxide as acceptor; Oxidoreductases; Acting on a peroxide as acceptor; Acting on a peroxide as acceptor
[BLASTED, MAPPED, ANNOTATED]	PNA_03_3_01852	glutamine-hydrolyzing GMP synthase	527	20	0	99.24	6	P:GO:0006177; P:GO:0006541; F:GO:0003922; F:GO:0005524; F:GO:0008483; F:GO:0016462	P:GMP biosynthetic process; P:glutamine metabolic process; F:GMP synthase (glutamine-hydrolyzing) activity; F:ATP binding; F:transaminase activity; F:pyrophosphatase activity	EC:2.6.1; EC:3.6.1; EC:6.3; EC:2; EC:6.3.5.2; EC:3.6; EC:2.6; EC:3; EC:6; EC:6.3.5	Transferring nitrogenous groups; Acting on acid anhydrides; Forming carbon-nitrogen bonds; Transferases; GMP synthase (glutamine-hydrolyzing); Acting on acid anhydrides; Transferring nitrogenous groups; Hydrolases; Ligases; Forming carbon-nitrogen bonds
[BLASTED, MAPPED, ANNOTATED]	PNA_03_3_01853	IMP dehydrogenase	489	20	0	98.92	4	P:GO:0006177; F:GO:0000166; F:GO:0003938; F:GO:0046872	P:GMP biosynthetic process; F:nucleotide binding; F:IMP dehydrogenase activity; F:metal ion binding	EC:1.1; EC:1.1.1.205; EC:1; EC:1.1.1	Acting on the CH-OH group of donors; IMP dehydrogenase; Oxidoreductases; Acting on the CH-OH group of donors
[BLASTED]	PNA_03_3_01865	type IV pilus biogenesis/stability protein PilW	244	20	1.4908e-173	92.1
[BLASTED, MAPPED, ANNOTATED]	PNA_03_3_01867	nucleoside-diphosphate kinase	144	20	5.74858e-101	98.71	8	P:GO:0006165; P:GO:0006183; P:GO:0006228; P:GO:0006241; F:GO:0004550; F:GO:0005524; F:GO:0046872; C:GO:0005737	P:nucleoside diphosphate phosphorylation; P:GTP biosynthetic process; P:UTP biosynthetic process; P:CTP biosynthetic process; F:nucleoside diphosphate kinase activity; F:ATP binding; F:metal ion binding; C:cytoplasm	EC:2.7; EC:2.7.4.6; EC:2; EC:2.7.4	Transferring phosphorus-containing groups; Nucleoside-diphosphate kinase; Transferases; Transferring phosphorus-containing groups
[BLASTED, MAPPED, ANNOTATED]	PNA_03_3_01873	IscS subfamily cysteine desulfurase	387	20	0	98.35	6	P:GO:0044571; F:GO:0030170; F:GO:0031071; F:GO:0046872; F:GO:0051537; C:GO:0005737	P:[2Fe-2S] cluster assembly; F:pyridoxal phosphate binding; F:cysteine desulfurase activity; F:metal ion binding; F:2 iron, 2 sulfur cluster binding; C:cytoplasm	EC:2.8.1; EC:2.8.1.7; EC:2; EC:2.8	Transferring sulfur-containing groups; Cysteine desulfurase; Transferases; Transferring sulfur-containing groups
[BLASTED, MAPPED, ANNOTATED]	PNA_03_3_01874	Fe-S cluster assembly transcriptional regulator IscR	166	20	1.44962e-117	98.03	5	P:GO:0006355; F:GO:0003690; F:GO:0003700; F:GO:0005506; F:GO:0051537	P:regulation of transcription, DNA-templated; F:double-stranded DNA binding; F:DNA-binding transcription factor activity; F:iron ion binding; F:2 iron, 2 sulfur cluster binding
[BLASTED, MAPPED, ANNOTATED]	PNA_03_3_01876	inositol-1-monophosphatase	268	20	0	98.88	7	P:GO:0031564; P:GO:0046854; P:GO:0046855; F:GO:0008934; F:GO:0046872; F:GO:0052832; F:GO:0052833	P:transcription antitermination; P:phosphatidylinositol phosphorylation; P:inositol phosphate dephosphorylation; F:inositol monophosphate 1-phosphatase activity; F:metal ion binding; F:inositol monophosphate 3-phosphatase activity; F:inositol monophosphate 4-phosphatase activity	EC:3.1; EC:3.1.3.25; EC:3; EC:3.1.3	Acting on ester bonds; Inositol-phosphate phosphatase; Hydrolases; Acting on ester bonds
[BLASTED, MAPPED, ANNOTATED]	PNA_03_3_01895	tRNA adenosine(34) deaminase TadA	176	20	4.43388e-125	97.63	3	P:GO:0002100; F:GO:0008270; F:GO:0052717	P:tRNA wobble adenosine to inosine editing; F:zinc ion binding; F:tRNA-specific adenosine-34 deaminase activity	EC:3.5.4; EC:3.5; EC:3; EC:3.5.4.4	Acting on carbon-nitrogen bonds, other than peptide bonds; Acting on carbon-nitrogen bonds, other than peptide bonds; Hydrolases; Adenosine deaminase
[BLASTED, MAPPED, ANNOTATED]	PNA_03_3_01906	elongation factor 4	600	20	0	99.19	7	P:GO:0006414; P:GO:0045727; F:GO:0003746; F:GO:0003924; F:GO:0005525; F:GO:0043022; C:GO:0005886	P:translational elongation; P:positive regulation of translation; F:translation elongation factor activity; F:GTPase activity; F:GTP binding; F:ribosome binding; C:plasma membrane	EC:3.6.1; EC:3.6; EC:3; EC:3.6.1.15	Acting on acid anhydrides; Acting on acid anhydrides; Hydrolases; Nucleoside-triphosphate phosphatase
[BLASTED, MAPPED, ANNOTATED]	PNA_03_3_03343	FxsA family protein	154	20	3.77075e-106	99.84	1	C:GO:0016021	C:integral component of membrane
[BLASTED, MAPPED, ANNOTATED]	PNA_03_3_03348	elongation factor P	189	20	1.44025e-136	98.67	3	P:GO:0006414; F:GO:0003746; C:GO:0005737	P:translational elongation; F:translation elongation factor activity; C:cytoplasm
[BLASTED, MAPPED, ANNOTATED]	PNA_03_3_03357	50S ribosomal protein L13	143	20	4.01737e-100	99.86	3	P:GO:0006412; F:GO:0003735; C:GO:0005840	P:translation; F:structural constituent of ribosome; C:ribosome
[BLASTED, MAPPED, ANNOTATED]	PNA_03_3_03359	stringent starvation protein A	214	20	6.19483e-154	98.08	1	P:GO:0006749	P:glutathione metabolic process
[BLASTED, MAPPED, ANNOTATED]	PNA_03_3_03368	ribosome hibernation promoting factor	96	20	1.54168e-62	96.79	1	P:GO:0006417	P:regulation of translation
[BLASTED, MAPPED, ANNOTATED]	PNA_03_3_03370	LPS export ABC transporter ATP-binding protein	242	20	1.26522e-172	99.61	5	P:GO:0055085; F:GO:0005524; F:GO:0042626; C:GO:0005737; C:GO:0043190	P:transmembrane transport; F:ATP binding; F:ATPase-coupled transmembrane transporter activity; C:cytoplasm; C:ATP-binding cassette (ABC) transporter complex	EC:3.6.1; EC:3.6; EC:3; EC:7.2.2; EC:7; EC:3.6.1.15	Acting on acid anhydrides; Acting on acid anhydrides; Hydrolases; Catalysing the translocation of inorganic cations; Translocases; Nucleoside-triphosphate phosphatase
[BLASTED, MAPPED, ANNOTATED]	PNA_03_3_03371	lipopolysaccharide ABC transporter substrate-binding protein LptA	185	20	6.69407e-131	97.93	4	P:GO:0015920; P:GO:0043165; F:GO:0001530; C:GO:0042597	P:lipopolysaccharide transport; P:Gram-negative-bacterium-type cell outer membrane assembly; F:lipopolysaccharide binding; C:periplasmic space
[BLASTED, MAPPED, ANNOTATED]	PNA_03_3_03372	LPS export ABC transporter periplasmic protein LptC	194	20	2.30951e-141	94.57	4	P:GO:0015920; P:GO:0043165; F:GO:0015221; C:GO:0005887	P:lipopolysaccharide transport; P:Gram-negative-bacterium-type cell outer membrane assembly; F:lipopolysaccharide transmembrane transporter activity; C:integral component of plasma membrane	EC:7	Translocases
[BLASTED, MAPPED, ANNOTATED]	PNA_03_3_03375	calcium/sodium antiporter	327	20	0	97.34	2	P:GO:0055085; C:GO:0016021	P:transmembrane transport; C:integral component of membrane
[BLASTED, MAPPED, ANNOTATED]	PNA_03_3_03376	phospholipid ABC transporter ATP-binding protein MlaF	272	20	0	98.1	3	P:GO:0055085; F:GO:0005524; F:GO:0042626	P:transmembrane transport; F:ATP binding; F:ATPase-coupled transmembrane transporter activity	EC:3.6.1; EC:3.6; EC:3; EC:7; EC:7.2.2; EC:3.6.1.15	Acting on acid anhydrides; Acting on acid anhydrides; Hydrolases; Translocases; Catalysing the translocation of inorganic cations; Nucleoside-triphosphate phosphatase
[BLASTED, MAPPED, ANNOTATED]	PNA_03_3_03383	helix-turn-helix domain-containing protein	94	20	1.15054e-60	95.79	1	F:GO:0003677	F:DNA binding
[BLASTED, MAPPED, ANNOTATED]	PNA_03_3_03385	50S ribosomal protein L21	104	20	1.42516e-67	98.98	4	P:GO:0006412; F:GO:0003735; F:GO:0019843; C:GO:0005840	P:translation; F:structural constituent of ribosome; F:rRNA binding; C:ribosome
[BLASTED, MAPPED, ANNOTATED]	PNA_03_3_03396	ribosome maturation factor RimP	144	20	9.82949e-101	98.74	2	P:GO:0042274; C:GO:0005737	P:ribosomal small subunit biogenesis; C:cytoplasm
[BLASTED, MAPPED, ANNOTATED]	PNA_03_3_03399	ribosome-binding factor A	136	20	1.6484e-92	97.44	2	P:GO:0030490; C:GO:0005737	P:maturation of SSU-rRNA; C:cytoplasm
[BLASTED, MAPPED, ANNOTATED]	PNA_03_3_03400	tRNA pseudouridine(55) synthase TruB	315	20	0	97.9	4	P:GO:0031119; F:GO:0003723; F:GO:0016829; F:GO:0106029	P:tRNA pseudouridine synthesis; F:RNA binding; F:lyase activity; F:tRNA pseudouridine synthase activity	EC:5.4.99.12; EC:5.4.99.45; EC:5.4.99.26; EC:5.4.99.25; EC:5.4.99.28; EC:5.4.99.27; EC:5.4; EC:4; EC:5; EC:5.4.99.42; EC:5.4.99.44	tRNA pseudouridine(38-40) synthase; tRNA pseudouridine(38/39) synthase; tRNA pseudouridine(65) synthase; tRNA pseudouridine(55) synthase; tRNA pseudouridine(32) synthase; tRNA pseudouridine(13) synthase; Intramolecular transferases; Lyases; Isomerases; tRNA pseudouridine(31) synthase; Mitochondrial tRNA pseudouridine(27/28) synthase
[BLASTED, MAPPED, ANNOTATED]	PNA_03_3_03401	30S ribosomal protein S15	90	20	9.26783e-56	99.21	4	P:GO:0006412; F:GO:0003735; F:GO:0019843; C:GO:0005840	P:translation; F:structural constituent of ribosome; F:rRNA binding; C:ribosome
[BLASTED, MAPPED, ANNOTATED]	PNA_03_3_03408	SCP2 sterol-binding domain-containing protein	175	20	3.92708e-123	96.52	1	P:GO:0006744	P:ubiquinone biosynthetic process
[BLASTED]	PNA_03_3_03974	Uncharacterised protein	137	20	1.61942e-94	87.32
[BLASTED, MAPPED, ANNOTATED]	PNA_14_11_00062	ABC transporter permease	377	20	0	95.69	3	P:GO:0055085; C:GO:0005886; C:GO:0016021	P:transmembrane transport; C:plasma membrane; C:integral component of membrane
[BLASTED, MAPPED, ANNOTATED]	PNA_14_11_03234	2-iminobutanoate/2-iminopropanoate deaminase	129	20	2.56831e-87	98.52	1	F:GO:0016787	F:hydrolase activity	EC:3	Hydrolases
[BLASTED, MAPPED, ANNOTATED]	PNA_15_2_02013	mannosyl-3-phosphoglycerate phosphatase-related protein	262	20	0	94.06	5	P:GO:0016311; P:GO:0051479; F:GO:0046872; F:GO:0050531; C:GO:0005737	P:dephosphorylation; P:mannosylglycerate biosynthetic process; F:metal ion binding; F:mannosyl-3-phosphoglycerate phosphatase activity; C:cytoplasm	EC:3.1; EC:3; EC:3.1.3.70; EC:3.1.3	Acting on ester bonds; Hydrolases; Mannosyl-3-phosphoglycerate phosphatase; Acting on ester bonds
[BLASTED, MAPPED, ANNOTATED]	PNA_15_2_02192	YbaK/prolyl-tRNA synthetase associated domain-containing protein	159	20	6.88456e-111	95.03	3	P:GO:0106074; F:GO:0002161; F:GO:0004812	P:aminoacyl-tRNA metabolism involved in translational fidelity; F:aminoacyl-tRNA editing activity; F:aminoacyl-tRNA ligase activity	EC:3.1; EC:6.1; EC:3; EC:6.1.1; EC:6; EC:3.1.1; EC:3.1.1.1	Acting on ester bonds; Forming carbon-oxygen bonds; Hydrolases; Forming carbon-oxygen bonds; Ligases; Acting on ester bonds; Carboxylesterase
[BLASTED, MAPPED, ANNOTATED]	PNA_15_2_02495	cytochrome ubiquinol oxidase subunit I	471	20	0	98.47	6	P:GO:0019646; F:GO:0009055; F:GO:0046872; C:GO:0005886; C:GO:0016021; C:GO:0070069	P:aerobic electron transport chain; F:electron transfer activity; F:metal ion binding; C:plasma membrane; C:integral component of membrane; C:cytochrome complex	EC:1	Oxidoreductases
[BLASTED, MAPPED, ANNOTATED]	PNA_15_2_02511	acyl-CoA thioester hydrolase	147	20	2.38182e-105	95.11	1	F:GO:0016787	F:hydrolase activity	EC:3	Hydrolases
[BLASTED, MAPPED, ANNOTATED]	PNA_15_2_02540	MFS transporter	436	20	0	98.36	3	P:GO:0055085; F:GO:0022857; C:GO:0016021	P:transmembrane transport; F:transmembrane transporter activity; C:integral component of membrane	EC:7	Translocases
[BLASTED, MAPPED, ANNOTATED]	PNA_15_2_02602	ADP-ribose pyrophosphatase	213	20	5.66288e-155	96.98	2	F:GO:0046872; F:GO:0047631	F:metal ion binding; F:ADP-ribose diphosphatase activity	EC:3.6.1; EC:3.6.1.13; EC:3.6; EC:3	Acting on acid anhydrides; ADP-ribose diphosphatase; Acting on acid anhydrides; Hydrolases
[BLASTED]	PNA_15_2_03149	acyl carrier protein	86	20	2.29355e-52	96.12
[BLASTED, MAPPED, ANNOTATED]	LMG2632_01479	ATP-dependent Clp protease proteolytic subunit	223	20	2.9257e-164	92.79	2	P:GO:0006508; F:GO:0008233	P:proteolysis; F:peptidase activity	EC:3.4; EC:3	Acting on peptide bonds (peptidases); Hydrolases
[BLASTED, MAPPED, ANNOTATED]	LMG2632_03032	5-dehydro-4-deoxy-D-glucuronate isomerase	279	20	0	96.9	3	P:GO:0045490; F:GO:0008270; F:GO:0008697	P:pectin catabolic process; F:zinc ion binding; F:4-deoxy-L-threo-5-hexosulose-uronate ketol-isomerase activity	EC:5.3.1.17; EC:5.3; EC:5; EC:5.3.1	5-dehydro-4-deoxy-D-glucuronate isomerase; Intramolecular oxidoreductases; Isomerases; Intramolecular oxidoreductases
[BLASTED, MAPPED, ANNOTATED]	NCPPB1562_02736	OHCU decarboxylase	165	20	1.11208e-113	95.49	3	P:GO:0006144; F:GO:0004846; F:GO:0016829	P:purine nucleobase metabolic process; F:urate oxidase activity; F:lyase activity	EC:1.7.3; EC:1; EC:1.7; EC:4; EC:1.7.3.3	Acting on other nitrogenous compounds as donors; Oxidoreductases; Acting on other nitrogenous compounds as donors; Lyases; Factor independent urate hydroxylase
[BLASTED]	NCPPB1562_03489	DUF1471 domain-containing protein	70	20	5.56551e-40	94.35
[BLASTED, MAPPED, ANNOTATED]	NCPPB1562_03640	TIGR01777 family protein	300	20	0	96.91	1	F:GO:0003824	F:catalytic activity
[BLASTED, MAPPED, ANNOTATED]	NCPPB2282_01320	mannosyl-3-phosphoglycerate phosphatase-related protein	262	20	0	94.06	5	P:GO:0016311; P:GO:0051479; F:GO:0046872; F:GO:0050531; C:GO:0005737	P:dephosphorylation; P:mannosylglycerate biosynthetic process; F:metal ion binding; F:mannosyl-3-phosphoglycerate phosphatase activity; C:cytoplasm	EC:3.1; EC:3; EC:3.1.3.70; EC:3.1.3	Acting on ester bonds; Hydrolases; Mannosyl-3-phosphoglycerate phosphatase; Acting on ester bonds
[BLASTED, MAPPED, ANNOTATED]	PANS_07_10_00043	hydroxyacid dehydrogenase	320	20	0	97.63	2	F:GO:0016616; F:GO:0051287	F:oxidoreductase activity, acting on the CH-OH group of donors, NAD or NADP as acceptor; F:NAD binding	EC:1.1; EC:1; EC:1.1.1	Acting on the CH-OH group of donors; Oxidoreductases; Acting on the CH-OH group of donors
[BLASTED]	PANS_07_10_00132	type IV pilus biogenesis/stability protein PilW	244	20	1.4908e-173	92.1
[BLASTED]	PANS_07_10_00246	DUF2502 domain-containing protein	117	20	1.21149e-75	87.49
[BLASTED, MAPPED, ANNOTATED]	PANS_07_10_00627	EmmdR/YeeO family multidrug/toxin efflux MATE transporter	487	20	0	98.4	5	P:GO:0042908; P:GO:0055085; F:GO:0015297; F:GO:0042910; C:GO:0016021	P:xenobiotic transport; P:transmembrane transport; F:antiporter activity; F:xenobiotic transmembrane transporter activity; C:integral component of membrane	EC:7	Translocases
[BLASTED]	PANS_07_10_00639	type VI secretion system tube protein Hcp	161	20	1.29019e-112	98.09
[BLASTED, MAPPED, ANNOTATED]	PANS_07_10_00645	serine/threonine-protein phosphatase	264	20	0	96.43	2	P:GO:0006470; F:GO:0004722	P:protein dephosphorylation; F:protein serine/threonine phosphatase activity	EC:3.1.3.16; EC:3.1; EC:3; EC:3.1.3	Protein-serine/threonine phosphatase; Acting on ester bonds; Hydrolases; Acting on ester bonds
[BLASTED, MAPPED, ANNOTATED]	PANS_07_10_00724	flagella biosynthesis regulatory protein FliZ	168	20	8.089e-123	99.07	2	P:GO:0015074; F:GO:0003677	P:DNA integration; F:DNA binding
[BLASTED, MAPPED, ANNOTATED]	PANS_07_10_00777	DUF2593 family protein	156	20	3.99877e-109	90.87	1	C:GO:0016021	C:integral component of membrane
[BLASTED]	PANS_07_10_00784	lipoprotein	180	20	2.32243e-129	92.79
[BLASTED, MAPPED, ANNOTATED]	PANS_07_10_00802	outer membrane lipoprotein chaperone LolA	204	20	4.03966e-147	97.31	3	P:GO:0042953; P:GO:0044874; C:GO:0042597	P:lipoprotein transport; P:lipoprotein localization to outer membrane; C:periplasmic space
[BLASTED]	PANS_07_10_00827	DUF882 domain-containing protein	184	20	2.42991e-133	94.55
[BLASTED, MAPPED, ANNOTATED]	PANS_07_10_00842	cell division protein ZapC	181	20	4.6057e-132	94.72	3	P:GO:0000917; P:GO:0043093; C:GO:0005737	P:division septum assembly; P:FtsZ-dependent cytokinesis; C:cytoplasm
[BLASTED]	PANS_07_10_00868	YccJ family protein	77	20	1.8162e-48	98.03
[BLASTED, MAPPED, ANNOTATED]	PANS_07_10_00919	flagellar biosynthesis protein FlgN	144	20	9.73595e-101	91.9	1	P:GO:0044780	P:bacterial-type flagellum assembly
[BLASTED, MAPPED, ANNOTATED]	PANS_07_10_00939	ketoacyl-ACP synthase III	318	20	0	97.27	4	P:GO:0006633; F:GO:0004315; F:GO:0033818; C:GO:0005737	P:fatty acid biosynthetic process; F:3-oxoacyl-[acyl-carrier-protein] synthase activity; F:beta-ketoacyl-acyl-carrier-protein synthase III activity; C:cytoplasm	EC:2.3.1.41; EC:2.3.1.85; EC:2.3.1.180; EC:2.3; EC:2; EC:2.3.1	Beta-ketoacyl-[acyl-carrier-protein] synthase I; Fatty-acid synthase system; Beta-ketoacyl-[acyl-carrier-protein] synthase III; Acyltransferases; Transferases; Acyltransferases
[BLASTED, MAPPED, ANNOTATED]	PANS_07_10_01136	aminoacyl-tRNA hydrolase	196	20	3.4109e-140	99.69	3	P:GO:0006412; F:GO:0004045; C:GO:0005737	P:translation; F:aminoacyl-tRNA hydrolase activity; C:cytoplasm	EC:3.1; EC:3; EC:3.1.1.29; EC:3.1.1; EC:3.1.1.1	Acting on ester bonds; Hydrolases; Aminoacyl-tRNA hydrolase; Acting on ester bonds; Carboxylesterase
[BLASTED, MAPPED, ANNOTATED]	PANS_07_10_01137	stress-induced protein YchH	92	20	6.69969e-61	90.49	1	C:GO:0016021	C:integral component of membrane
[BLASTED, MAPPED, ANNOTATED]	PANS_07_10_01171	ABC transporter permease	356	20	0	98.25	4	P:GO:0055085; F:GO:0022857; C:GO:0005886; C:GO:0016021	P:transmembrane transport; F:transmembrane transporter activity; C:plasma membrane; C:integral component of membrane	EC:7	Translocases
[BLASTED, MAPPED, ANNOTATED]	PANS_07_10_01245	DUF1656 domain-containing protein	81	20	1.77573e-48	88.72	1	C:GO:0016021	C:integral component of membrane
[BLASTED, MAPPED, ANNOTATED]	PANS_07_10_01381	Tol-Pal system protein TolQ	229	20	4.55578e-163	98.86	4	P:GO:0007049; P:GO:0043213; P:GO:0051301; C:GO:0005887	P:cell cycle; P:bacteriocin transport; P:cell division; C:integral component of plasma membrane
[BLASTED, MAPPED, ANNOTATED]	PANS_07_10_01389	2-oxoglutarate dehydrogenase complex dihydrolipoyllysine-residue succinyltransferase	408	20	0	99.02	4	P:GO:0006099; P:GO:0033512; F:GO:0004149; C:GO:0045252	P:tricarboxylic acid cycle; P:L-lysine catabolic process to acetyl-CoA via saccharopine; F:dihydrolipoyllysine-residue succinyltransferase activity; C:oxoglutarate dehydrogenase complex	EC:2.3; EC:2.3.1.61; EC:2; EC:2.3.1	Acyltransferases; Dihydrolipoyllysine-residue succinyltransferase; Transferases; Acyltransferases
[BLASTED, MAPPED, ANNOTATED]	PANS_07_10_01840	zinc uptake transcriptional repressor Zur	174	20	2.86131e-125	96.36	2	P:GO:0006355; F:GO:0003700	P:regulation of transcription, DNA-templated; F:DNA-binding transcription factor activity
[BLASTED, MAPPED, ANNOTATED]	PANS_07_10_01888	response regulator	220	20	5.99887e-154	98.74	5	P:GO:0000160; P:GO:0006355; P:GO:0006508; F:GO:0003677; F:GO:0004190	P:phosphorelay signal transduction system; P:regulation of transcription, DNA-templated; P:proteolysis; F:DNA binding; F:aspartic-type endopeptidase activity	EC:3.4.99; EC:3.4.23.1; EC:3.4.23; EC:3.4.23.32; EC:3.4.23.43; EC:3.4.23.20; EC:3.4.23.25; EC:3.4.23.36; EC:3.4.23.4; EC:3.4.23.35; EC:3.4.23.5; EC:3.4.23.34; EC:3.4.23.15; EC:3.4; EC:3	Acting on peptide bonds (peptidases); Pepsin A; Acting on peptide bonds (peptidases); Scytalidopepsin B; Prepilin peptidase; Penicillopepsin; Saccharopepsin; Signal peptidase II; Chymosin; Barrierpepsin; Cathepsin D; Cathepsin E; Renin; Acting on peptide bonds (peptidases); Hydrolases
[BLASTED, MAPPED, ANNOTATED]	PANS_07_10_02105	RNA polymerase factor sigma-54	479	20	0	98.33	6	P:GO:0045893; P:GO:2000142; F:GO:0001216; F:GO:0003677; F:GO:0003899; F:GO:0016987	P:positive regulation of transcription, DNA-templated; P:regulation of DNA-templated transcription, initiation; F:DNA-binding transcription activator activity; F:DNA binding; F:DNA-directed 5'-3' RNA polymerase activity; F:sigma factor activity	EC:2.7; EC:2; EC:2.7.7; EC:2.7.7.6	Transferring phosphorus-containing groups; Transferases; Transferring phosphorus-containing groups; DNA-directed RNA polymerase
[BLASTED, MAPPED, ANNOTATED]	PANS_07_10_02117	BolA family iron metabolism protein IbaG	86	20	3.04102e-56	99.71	1	F:GO:0003677	F:DNA binding
[BLASTED, MAPPED, ANNOTATED]	PANS_07_10_02150	anaerobic ribonucleoside-triphosphate reductase-activating protein	156	20	4.38295e-112	95.26	3	F:GO:0043365; F:GO:0046872; F:GO:0051539	F:[formate-C-acetyltransferase]-activating enzyme activity; F:metal ion binding; F:4 iron, 4 sulfur cluster binding	EC:1.97.1; EC:1; EC:1.97.1.4	Other oxidoreductases; Oxidoreductases; [Formate-C-acetyltransferase]-activating enzyme
[BLASTED, MAPPED, ANNOTATED]	PANS_07_10_02665	DNA topoisomerase IV subunit B	632	20	0	98.68	6	P:GO:0006265; P:GO:0007059; F:GO:0003677; F:GO:0003918; F:GO:0005524; C:GO:0005694	P:DNA topological change; P:chromosome segregation; F:DNA binding; F:DNA topoisomerase type II (double strand cut, ATP-hydrolyzing) activity; F:ATP binding; C:chromosome	EC:3.6.1; EC:3.6; EC:3; EC:5; EC:5.6.2; EC:5.6.2.2; EC:3.6.1.15	Acting on acid anhydrides; Acting on acid anhydrides; Hydrolases; Isomerases; Isomerases altering macromolecular conformation; DNA topoisomerase (ATP-hydrolyzing); Nucleoside-triphosphate phosphatase
[BLASTED]	PANS_07_10_02667	NAD(P)H-dependent oxidoreductase	194	20	3.81833e-142	97.87
[BLASTED, MAPPED, ANNOTATED]	PANS_07_10_02669	ketose-bisphosphate aldolase	287	20	0	99.07	3	P:GO:0005975; F:GO:0008270; F:GO:0009025	P:carbohydrate metabolic process; F:zinc ion binding; F:tagatose-bisphosphate aldolase activity	EC:4.1.2; EC:4.1; EC:4; EC:4.1.2.40	Carbon-carbon lyases; Carbon-carbon lyases; Lyases; Tagatose-bisphosphate aldolase
[BLASTED, MAPPED, ANNOTATED]	PANS_07_10_02670	class II fructose-bisphosphate aldolase family protein	284	20	0	95.05	3	P:GO:0005975; F:GO:0008270; F:GO:0016832	P:carbohydrate metabolic process; F:zinc ion binding; F:aldehyde-lyase activity	EC:4.1.2; EC:4.1; EC:4	Carbon-carbon lyases; Carbon-carbon lyases; Lyases
[BLASTED, MAPPED, ANNOTATED]	PANS_07_10_02671	PTS fructose transporter subunit IIC	364	20	0	98.47	8	P:GO:0009401; P:GO:0034219; P:GO:1902600; F:GO:0005351; F:GO:0008982; F:GO:0103111; C:GO:0005886; C:GO:0016021	P:phosphoenolpyruvate-dependent sugar phosphotransferase system; P:carbohydrate transmembrane transport; P:proton transmembrane transport; F:carbohydrate:proton symporter activity; F:protein-N(PI)-phosphohistidine-sugar phosphotransferase activity; F:D-glucosamine PTS permease activity; C:plasma membrane; C:integral component of membrane	EC:2.7.1; EC:2.7; EC:2; EC:7; EC:2.7.1.69	Transferring phosphorus-containing groups; Transferring phosphorus-containing groups; Transferases; Translocases; Transferring phosphorus-containing groups
[BLASTED, MAPPED, ANNOTATED]	PANS_07_10_02672	PTS fructose transporter subunit IIB	105	20	5.54114e-67	95.67	4	P:GO:0009401; P:GO:0015755; F:GO:0022877; F:GO:0103111	P:phosphoenolpyruvate-dependent sugar phosphotransferase system; P:fructose transmembrane transport; F:protein-N(PI)-phosphohistidine-fructose phosphotransferase system transporter activity; F:D-glucosamine PTS permease activity	EC:2.7.1; EC:2.7; EC:2; EC:7; EC:2.7.1.69	Transferring phosphorus-containing groups; Transferring phosphorus-containing groups; Transferases; Translocases; Transferring phosphorus-containing groups
[BLASTED, MAPPED, ANNOTATED]	PANS_07_10_02735	purine-nucleoside phosphorylase	238	20	2.11143e-173	99.41	2	P:GO:0042278; F:GO:0004731	P:purine nucleoside metabolic process; F:purine-nucleoside phosphorylase activity	EC:2.4.2; EC:2.4.2.1; EC:2.4; EC:2	Glycosyltransferases; Purine-nucleoside phosphorylase; Glycosyltransferases; Transferases
[BLASTED]	PANS_07_10_02753	YfdX family protein	222	20	5.26856e-160	97.41
[BLASTED, MAPPED, ANNOTATED]	PANS_07_10_02788	PTS mannitol transporter subunit IIB	90	20	4.98435e-57	95.84	4	P:GO:0009401; P:GO:0034219; F:GO:0008982; F:GO:0103111	P:phosphoenolpyruvate-dependent sugar phosphotransferase system; P:carbohydrate transmembrane transport; F:protein-N(PI)-phosphohistidine-sugar phosphotransferase activity; F:D-glucosamine PTS permease activity	EC:2.7.1; EC:2.7; EC:2; EC:7; EC:2.7.1.69	Transferring phosphorus-containing groups; Transferring phosphorus-containing groups; Transferases; Translocases; Transferring phosphorus-containing groups
[BLASTED]	PANS_07_10_02855	prepilin-type N-terminal cleavage/methylation domain-containing protein	109	20	1.0411e-71	87.75
[BLASTED, MAPPED, ANNOTATED]	PANS_07_10_02894	6-carboxytetrahydropterin synthase QueD	120	20	2.02922e-84	98.45	3	P:GO:0008616; F:GO:0046872; F:GO:0070497	P:queuosine biosynthetic process; F:metal ion binding; F:6-carboxy-5,6,7,8-tetrahydropterin synthase activity	EC:4.2.1; EC:4.2; EC:4; EC:4.1.2.50	Carbon-oxygen lyases; Carbon-oxygen lyases; Lyases; 6-carboxytetrahydropterin synthase
[BLASTED, MAPPED, ANNOTATED]	PANS_07_10_04327	chemotaxis protein	515	20	0	95.84	4	P:GO:0006935; P:GO:0007165; F:GO:0004888; C:GO:0016021	P:chemotaxis; P:signal transduction; F:transmembrane signaling receptor activity; C:integral component of membrane
[BLASTED]	PANS_07_10_04341	baseplate assembly protein	303	20	0	98.69
[BLASTED, MAPPED, ANNOTATED]	PANS_07_12_00117	EmmdR/YeeO family multidrug/toxin efflux MATE transporter	487	20	0	98.4	5	P:GO:0042908; P:GO:0055085; F:GO:0015297; F:GO:0042910; C:GO:0016021	P:xenobiotic transport; P:transmembrane transport; F:antiporter activity; F:xenobiotic transmembrane transporter activity; C:integral component of membrane	EC:7	Translocases
[BLASTED]	PANS_07_12_00612	type IV pilus biogenesis/stability protein PilW	244	20	1.4908e-173	92.1
[BLASTED, MAPPED, ANNOTATED]	PANS_07_12_01137	stress-induced protein YchH	92	20	6.69969e-61	90.49	1	C:GO:0016021	C:integral component of membrane
[BLASTED]	PANS_07_12_02286	helix-turn-helix transcriptional regulator	127	20	7.29774e-88	91.66
[BLASTED, MAPPED, ANNOTATED]	PANS_07_14_00439	3-deoxy-7-phosphoheptulonate synthase AroG	351	20	0	98.44	4	P:GO:0008652; P:GO:0009073; P:GO:0009423; F:GO:0003849	P:cellular amino acid biosynthetic process; P:aromatic amino acid family biosynthetic process; P:chorismate biosynthetic process; F:3-deoxy-7-phosphoheptulonate synthase activity	EC:2.5.1; EC:2.5; EC:2; EC:2.5.1.54	Transferring alkyl or aryl groups, other than methyl groups; Transferring alkyl or aryl groups, other than methyl groups; Transferases; 3-deoxy-7-phosphoheptulonate synthase
[BLASTED, MAPPED, ANNOTATED]	PANS_07_14_00540	membrane protein	133	20	5.40538e-89	85.81	1	C:GO:0016021	C:integral component of membrane
[BLASTED]	PANS_07_14_00796	DUF1611 domain-containing protein	336	20	0	98.34
[BLASTED, MAPPED, ANNOTATED]	PANS_07_14_00798	ABC transporter ATP-binding protein	622	20	0	99.61	4	P:GO:0015833; P:GO:0055085; F:GO:0005524; F:GO:0042626	P:peptide transport; P:transmembrane transport; F:ATP binding; F:ATPase-coupled transmembrane transporter activity	EC:3.6.1; EC:3.6; EC:3; EC:7; EC:7.2.2; EC:3.6.1.15	Acting on acid anhydrides; Acting on acid anhydrides; Hydrolases; Translocases; Catalysing the translocation of inorganic cations; Nucleoside-triphosphate phosphatase
[BLASTED]	PANS_07_14_00901	signal peptide prediction	399	20	0	98.68
[BLASTED]	PANS_07_14_01027	Uncharacterised protein	137	20	1.61942e-94	87.32
[BLASTED, MAPPED, ANNOTATED]	PANS_07_14_02385	ADP-ribose pyrophosphatase	213	20	5.66288e-155	96.98	2	F:GO:0046872; F:GO:0047631	F:metal ion binding; F:ADP-ribose diphosphatase activity	EC:3.6.1; EC:3.6.1.13; EC:3.6; EC:3	Acting on acid anhydrides; ADP-ribose diphosphatase; Acting on acid anhydrides; Hydrolases
[BLASTED, MAPPED, ANNOTATED]	PANS_07_14_02447	MFS transporter	436	20	0	98.36	3	P:GO:0055085; F:GO:0022857; C:GO:0016021	P:transmembrane transport; F:transmembrane transporter activity; C:integral component of membrane	EC:7	Translocases
[BLASTED, MAPPED, ANNOTATED]	PANS_07_14_02475	acyl-CoA thioester hydrolase	147	20	2.38182e-105	95.11	1	F:GO:0016787	F:hydrolase activity	EC:3	Hydrolases
[BLASTED, MAPPED, ANNOTATED]	PANS_07_14_02491	cytochrome ubiquinol oxidase subunit I	471	20	0	98.47	6	P:GO:0019646; F:GO:0009055; F:GO:0046872; C:GO:0005886; C:GO:0016021; C:GO:0070069	P:aerobic electron transport chain; F:electron transfer activity; F:metal ion binding; C:plasma membrane; C:integral component of membrane; C:cytochrome complex	EC:1	Oxidoreductases
[BLASTED, MAPPED, ANNOTATED]	PANS_07_4_00002	NAD-dependent malic enzyme	566	20	0	99.28	4	F:GO:0004471; F:GO:0008948; F:GO:0046872; F:GO:0051287	F:malate dehydrogenase (decarboxylating) (NAD+) activity; F:oxaloacetate decarboxylase activity; F:metal ion binding; F:NAD binding	EC:4.1.1; EC:1.1; EC:4.1; EC:1; EC:4.1.1.112; EC:1.1.1; EC:4; EC:1.1.1.38; EC:1.1.1.39; EC:1.1.1.40	Carbon-carbon lyases; Acting on the CH-OH group of donors; Carbon-carbon lyases; Oxidoreductases; Oxaloacetate decarboxylase; Acting on the CH-OH group of donors; Lyases; Malate dehydrogenase (oxaloacetate-decarboxylating); Malate dehydrogenase (decarboxylating); Malate dehydrogenase (oxaloacetate-decarboxylating) (NADP(+))
[BLASTED, MAPPED, ANNOTATED]	PANS_07_4_00019	two-component system response regulator BaeR	236	20	7.80887e-171	97.12	3	P:GO:0000160; P:GO:0006355; F:GO:0003677	P:phosphorelay signal transduction system; P:regulation of transcription, DNA-templated; F:DNA binding
[BLASTED, MAPPED, ANNOTATED]	PANS_07_4_00034	protein tyrosine phosphatase	145	20	7.13229e-102	95.42	2	P:GO:0035335; F:GO:0004725	P:peptidyl-tyrosine dephosphorylation; F:protein tyrosine phosphatase activity	EC:3.1; EC:3.1.3.48; EC:3; EC:3.1.3	Acting on ester bonds; Protein-tyrosine-phosphatase; Hydrolases; Acting on ester bonds
[BLASTED, MAPPED, ANNOTATED]	PANS_07_4_00036	EpsG family protein	379	20	0	97.71	1	C:GO:0016021	C:integral component of membrane
[BLASTED, MAPPED, ANNOTATED]	PANS_07_4_00039	amylovoran biosynthesis protein AmsD	345	20	0	98.78	1	F:GO:0016757	F:transferase activity, transferring glycosyl groups	EC:2.4; EC:2	Glycosyltransferases; Transferases
[BLASTED, MAPPED, ANNOTATED]	PANS_07_4_00050	dTDP-4-dehydrorhamnose 3,5-epimerase	188	20	2.97824e-135	86.37	2	P:GO:0019305; F:GO:0008830	P:dTDP-rhamnose biosynthetic process; F:dTDP-4-dehydrorhamnose 3,5-epimerase activity	EC:5.1; EC:5.1.3.13; EC:5; EC:5.1.3	Racemases and epimerases; dTDP-4-dehydrorhamnose 3,5-epimerase; Isomerases; Racemases and epimerases
[BLASTED, MAPPED, ANNOTATED]	PANS_07_4_00059	glycosyltransferase	248	20	1.65275e-179	85.95	1	F:GO:0016740	F:transferase activity	EC:2	Transferases
[BLASTED, MAPPED, ANNOTATED]	PANS_07_4_00065	YbaK/prolyl-tRNA synthetase associated domain-containing protein	159	20	6.88456e-111	95.03	3	P:GO:0106074; F:GO:0002161; F:GO:0004812	P:aminoacyl-tRNA metabolism involved in translational fidelity; F:aminoacyl-tRNA editing activity; F:aminoacyl-tRNA ligase activity	EC:3.1; EC:6.1; EC:3; EC:6.1.1; EC:6; EC:3.1.1; EC:3.1.1.1	Acting on ester bonds; Forming carbon-oxygen bonds; Hydrolases; Forming carbon-oxygen bonds; Ligases; Acting on ester bonds; Carboxylesterase
[BLASTED, MAPPED, ANNOTATED]	PANS_07_4_00081	DeoR/GlpR transcriptional regulator	256	20	0	98.51	3	P:GO:0006355; F:GO:0003677; F:GO:0003700	P:regulation of transcription, DNA-templated; F:DNA binding; F:DNA-binding transcription factor activity
[BLASTED]	PANS_07_4_00117	sarcosine oxidase subunit gamma	225	20	4.70978e-162	89.13
[BLASTED, MAPPED, ANNOTATED]	PANS_07_4_00123	GlxA family transcriptional regulator	383	20	0	90.59	4	P:GO:0006355; F:GO:0003700; F:GO:0043565; C:GO:0016021	P:regulation of transcription, DNA-templated; F:DNA-binding transcription factor activity; F:sequence-specific DNA binding; C:integral component of membrane
[BLASTED, MAPPED, ANNOTATED]	PANS_07_4_00143	ABC transporter permease	283	20	0	97.29	3	P:GO:0055085; C:GO:0005886; C:GO:0016021	P:transmembrane transport; C:plasma membrane; C:integral component of membrane
[BLASTED, MAPPED, ANNOTATED]	PANS_07_4_00144	ABC transporter ATP-binding protein	555	20	0	98.66	3	P:GO:0055085; F:GO:0005524; F:GO:0042626	P:transmembrane transport; F:ATP binding; F:ATPase-coupled transmembrane transporter activity	EC:3.6.1; EC:3.6; EC:3; EC:7; EC:7.2.2; EC:3.6.1.15	Acting on acid anhydrides; Acting on acid anhydrides; Hydrolases; Translocases; Catalysing the translocation of inorganic cations; Nucleoside-triphosphate phosphatase
[BLASTED, MAPPED, ANNOTATED]	PANS_07_4_00150	Lrp/AsnC family transcriptional regulator	172	20	9.08725e-124	99.32	1	F:GO:0043565	F:sequence-specific DNA binding
[BLASTED, MAPPED, ANNOTATED]	PANS_07_4_00168	sugar ABC transporter ATP-binding protein	505	20	0	98.13	5	P:GO:0015752; F:GO:0005524; F:GO:0015611; F:GO:0043211; C:GO:0005886	P:D-ribose transmembrane transport; F:ATP binding; F:ABC-type D-ribose transporter activity; F:ATPase-coupled carbohydrate transmembrane transporter activity; C:plasma membrane	EC:3.6.1; EC:3.6; EC:3; EC:7.2.2; EC:7; EC:3.6.1.15; EC:7.5.2.8	Acting on acid anhydrides; Acting on acid anhydrides; Hydrolases; Catalysing the translocation of inorganic cations; Translocases; Nucleoside-triphosphate phosphatase; ABC-type D-allose transporter
[BLASTED, MAPPED, ANNOTATED]	PANS_07_4_00171	D-lyxose/D-mannose family sugar isomerase	231	20	1.89426e-170	95.17	2	F:GO:0016787; F:GO:0016853	F:hydrolase activity; F:isomerase activity	EC:3; EC:5	Hydrolases; Isomerases
[BLASTED, MAPPED, ANNOTATED]	PANS_07_4_00862	murein lipoprotein	79	20	1.55135e-46	99.49	7	P:GO:0030258; P:GO:0043580; F:GO:0008289; F:GO:0042834; C:GO:0005576; C:GO:0005618; C:GO:0009279	P:lipid modification; P:periplasmic space organization; F:lipid binding; F:peptidoglycan binding; C:extracellular region; C:cell wall; C:cell outer membrane
[BLASTED, MAPPED, ANNOTATED]	PANS_07_4_00879	endopeptidase	153	20	1.86934e-107	95.25	1	F:GO:0016787	F:hydrolase activity	EC:3	Hydrolases
[BLASTED, MAPPED, ANNOTATED]	PANS_07_4_00881	glutathione peroxidase	182	20	8.68348e-133	96.66	4	P:GO:0006979; P:GO:0098869; F:GO:0004602; F:GO:0051920	P:response to oxidative stress; P:cellular oxidant detoxification; F:glutathione peroxidase activity; F:peroxiredoxin activity	EC:1.11; EC:1; EC:1.11.1; EC:1.11.1.15; EC:1.11.1.9	Acting on a peroxide as acceptor; Oxidoreductases; Acting on a peroxide as acceptor; Acting on a peroxide as acceptor; Glutathione peroxidase
[BLASTED, MAPPED, ANNOTATED]	PANS_07_4_00883	integration host factor subunit alpha	101	20	2.40187e-65	99.8	4	P:GO:0006310; P:GO:0006355; P:GO:0006417; F:GO:0003677	P:DNA recombination; P:regulation of transcription, DNA-templated; P:regulation of translation; F:DNA binding
[BLASTED, MAPPED, ANNOTATED]	PANS_07_4_00885	phenylalanine--tRNA ligase subunit alpha	328	20	0	99.07	6	P:GO:0006432; F:GO:0000049; F:GO:0000287; F:GO:0004826; F:GO:0005524; C:GO:0005737	P:phenylalanyl-tRNA aminoacylation; F:tRNA binding; F:magnesium ion binding; F:phenylalanine-tRNA ligase activity; F:ATP binding; C:cytoplasm	EC:6.1.1.20; EC:6.1; EC:6.1.1; EC:6	Phenylalanine--tRNA ligase; Forming carbon-oxygen bonds; Forming carbon-oxygen bonds; Ligases
[BLASTED, MAPPED, ANNOTATED]	PANS_07_4_00886	50S ribosomal protein L20	119	20	8.04544e-75	99.45	5	P:GO:0000027; P:GO:0006412; F:GO:0003735; F:GO:0019843; C:GO:0005840	P:ribosomal large subunit assembly; P:translation; F:structural constituent of ribosome; F:rRNA binding; C:ribosome
[BLASTED, MAPPED, ANNOTATED]	PANS_07_4_00888	translation initiation factor IF-3	161	20	1.86228e-110	99.84	3	P:GO:0006413; F:GO:0003743; C:GO:0005737	P:translational initiation; F:translation initiation factor activity; C:cytoplasm
[BLASTED, MAPPED, ANNOTATED]	PANS_07_4_00895	metal-dependent hydrolase	197	20	7.73537e-140	95.46	1	F:GO:0016787	F:hydrolase activity	EC:3	Hydrolases
[BLASTED, MAPPED, ANNOTATED]	PANS_07_4_00927	DotU family type IV/VI secretion system protein	406	20	0	96.84	1	C:GO:0016021	C:integral component of membrane
[BLASTED]	PANS_07_4_00932	putative type VI secretion system-associated protein	314	20	0	91.98
[BLASTED, MAPPED, ANNOTATED]	PANS_07_4_00943	lipoprotein localization protein LolB	209	20	2.03557e-150	95.84	3	P:GO:0015031; P:GO:0044874; C:GO:0009279	P:protein transport; P:lipoprotein localization to outer membrane; C:cell outer membrane
[BLASTED, MAPPED, ANNOTATED]	PANS_07_4_00951	chemotaxis protein	515	20	0	91.52	4	P:GO:0006935; P:GO:0007165; F:GO:0004888; C:GO:0016021	P:chemotaxis; P:signal transduction; F:transmembrane signaling receptor activity; C:integral component of membrane
[BLASTED]	PANS_07_4_00960	unnamed protein product	87	20	7.57503e-56	83.48
[BLASTED]	PANS_07_4_01014	four-helix bundle copper-binding protein	109	20	1.22456e-68	92.87
[BLASTED, MAPPED, ANNOTATED]	PANS_07_4_01067	GlsB/YeaQ/YmgE family stress response membrane protein	83	20	1.648e-44	99.51	2	C:GO:0005886; C:GO:0016021	C:plasma membrane; C:integral component of membrane
[BLASTED]	PANS_07_4_01078	MULTISPECIES: hypothetical protein	128	20	2.26218e-90	88.15
[BLASTED]	PANS_07_4_01092	hypothetical protein	168	20	2.53887e-121	76.84
[BLASTED, MAPPED, ANNOTATED]	PANS_07_4_01114	penicillin-binding protein activator LpoB	201	20	6.8724e-138	91.75	5	P:GO:0008360; P:GO:0009252; P:GO:0050790; F:GO:0030234; C:GO:0031241	P:regulation of cell shape; P:peptidoglycan biosynthetic process; P:regulation of catalytic activity; F:enzyme regulator activity; C:periplasmic side of cell outer membrane
[BLASTED]	PANS_07_4_01115	DUF1425 domain-containing protein	123	20	1.48632e-83	95.54
[BLASTED, MAPPED, ANNOTATED]	PANS_07_4_01116	purine nucleoside phosphoramidase	117	20	8.61862e-80	97.06	1	F:GO:0016787	F:hydrolase activity	EC:3	Hydrolases
[BLASTED, MAPPED, ANNOTATED]	PANS_07_4_01119	metal-dependent hydrolase	264	20	0	98.1	2	P:GO:0006259; F:GO:0016888	P:DNA metabolic process; F:endodeoxyribonuclease activity, producing 5'-phosphomonoesters	EC:3.1.30; EC:3.1; EC:3.1.21; EC:3	Acting on ester bonds; Acting on ester bonds; Acting on ester bonds; Hydrolases
[BLASTED, MAPPED, ANNOTATED]	PANS_07_4_01125	Acyl carrier protein	79	20	6.16692e-47	98.72	4	P:GO:0006633; F:GO:0000036; F:GO:0031177; C:GO:0005737	P:fatty acid biosynthetic process; F:acyl carrier activity; F:phosphopantetheine binding; C:cytoplasm
[BLASTED, MAPPED, ANNOTATED]	PANS_07_4_01126	3-oxoacyl-ACP reductase FabG	245	20	6.86237e-172	98.93	5	P:GO:0006633; F:GO:0004316; F:GO:0051287; F:GO:0102131; F:GO:0102132	P:fatty acid biosynthetic process; F:3-oxoacyl-[acyl-carrier-protein] reductase (NADPH) activity; F:NAD binding; F:3-oxo-glutaryl-[acp] methyl ester reductase activity; F:3-oxo-pimeloyl-[acp] methyl ester reductase activity	EC:2.3.1.85; EC:1.1; EC:2.3; EC:1; EC:2; EC:1.1.1; EC:1.1.1.100; EC:2.3.1	Fatty-acid synthase system; Acting on the CH-OH group of donors; Acyltransferases; Oxidoreductases; Transferases; Acting on the CH-OH group of donors; 3-oxoacyl-[acyl-carrier-protein] reductase; Acyltransferases
[BLASTED]	PANS_07_4_01131	23S rRNA accumulation protein YceD	174	20	6.85224e-122	97.95
[BLASTED, MAPPED, ANNOTATED]	PANS_07_4_01137	flagellar assembly peptidoglycan hydrolase FlgJ	315	20	0	96.07	5	P:GO:0008152; P:GO:0044780; F:GO:0004040; F:GO:0016798; C:GO:0042597	P:metabolic process; P:bacterial-type flagellum assembly; F:amidase activity; F:hydrolase activity, acting on glycosyl bonds; C:periplasmic space	EC:3.5.1; EC:3.5.1.4; EC:3.2; EC:3.5; EC:3	Acting on carbon-nitrogen bonds, other than peptide bonds; Amidase; Glycosylases; Acting on carbon-nitrogen bonds, other than peptide bonds; Hydrolases
[BLASTED, MAPPED, ANNOTATED]	PANS_07_4_01142	flagellar hook protein FlgE	416	20	0	88.9	2	P:GO:0071973; C:GO:0009425	P:bacterial-type flagellum-dependent cell motility; C:bacterial-type flagellum basal body
[BLASTED, MAPPED, ANNOTATED]	PANS_07_4_01144	flagellar basal body rod protein FlgC	135	20	5.99404e-90	99.63	2	P:GO:0071973; C:GO:0030694	P:bacterial-type flagellum-dependent cell motility; C:bacterial-type flagellum basal body, rod
[BLASTED]	PANS_07_4_01154	lipoprotein	188	20	4.67056e-135	96.22
[BLASTED, MAPPED, ANNOTATED]	PANS_07_4_01155	dihydroorotase	348	20	0	97.82	4	P:GO:0019856; P:GO:0044205; F:GO:0004151; F:GO:0008270	P:pyrimidine nucleobase biosynthetic process; P:'de novo' UMP biosynthetic process; F:dihydroorotase activity; F:zinc ion binding	EC:3.5.2.3; EC:3.5.2; EC:3.5; EC:3	Dihydroorotase; Acting on carbon-nitrogen bonds, other than peptide bonds; Acting on carbon-nitrogen bonds, other than peptide bonds; Hydrolases
[BLASTED]	PANS_07_4_01157	Uncharacterised protein	91	20	1.25758e-57	91.38
[BLASTED]	PANS_07_4_01158	biofilm formation regulator BssS	85	20	3.39819e-54	95.59
[BLASTED, MAPPED, ANNOTATED]	PANS_07_4_01178	AraC family transcriptional regulator	282	20	0	95.16	3	P:GO:0006355; F:GO:0003700; F:GO:0043565	P:regulation of transcription, DNA-templated; F:DNA-binding transcription factor activity; F:sequence-specific DNA binding
[BLASTED, MAPPED, ANNOTATED]	PANS_07_4_01425	SH3 domain-containing protein	207	20	2.5204e-147	97.33	1	C:GO:0016021	C:integral component of membrane
[BLASTED, MAPPED, ANNOTATED]	PANS_07_4_01434	outer membrane channel protein TolC	491	20	0	95.67	4	P:GO:0055085; F:GO:0015562; C:GO:0016021; C:GO:0019867	P:transmembrane transport; F:efflux transmembrane transporter activity; C:integral component of membrane; C:outer membrane	EC:7	Translocases
[BLASTED, MAPPED, ANNOTATED]	PANS_07_4_01438	esterase YqiA	194	20	2.33499e-141	98.49	1	F:GO:0016787	F:hydrolase activity	EC:3	Hydrolases
[BLASTED, MAPPED, ANNOTATED]	PANS_07_4_01506	deoxyribose-phosphate aldolase	260	20	0	99.15	5	P:GO:0009264; P:GO:0016052; P:GO:0046386; F:GO:0004139; C:GO:0005737	P:deoxyribonucleotide catabolic process; P:carbohydrate catabolic process; P:deoxyribose phosphate catabolic process; F:deoxyribose-phosphate aldolase activity; C:cytoplasm	EC:4.1.2; EC:4.1; EC:4.1.2.4; EC:4	Carbon-carbon lyases; Carbon-carbon lyases; Deoxyribose-phosphate aldolase; Lyases
[BLASTED]	PANS_07_4_01529	hypothetical protein	81	20	6.00786e-51	72.28
[BLASTED, MAPPED, ANNOTATED]	PANS_07_4_01539	antibiotic biosynthesis monooxygenase	108	20	7.43085e-72	88.22	1	F:GO:0004497	F:monooxygenase activity	EC:1	Oxidoreductases
[BLASTED]	PANS_07_4_01540	SDR family oxidoreductase	286	20	0	96.49
[BLASTED, MAPPED, ANNOTATED]	PANS_07_4_01542	cytochrome ubiquinol oxidase subunit I	471	20	0	98.47	6	P:GO:0019646; F:GO:0009055; F:GO:0046872; C:GO:0005886; C:GO:0016021; C:GO:0070069	P:aerobic electron transport chain; F:electron transfer activity; F:metal ion binding; C:plasma membrane; C:integral component of membrane; C:cytochrome complex	EC:1	Oxidoreductases
[BLASTED, MAPPED, ANNOTATED]	PANS_07_4_01543	cytochrome d ubiquinol oxidase subunit II	335	20	0	97.87	3	F:GO:0016491; C:GO:0005886; C:GO:0016021	F:oxidoreductase activity; C:plasma membrane; C:integral component of membrane	EC:1	Oxidoreductases
[BLASTED, MAPPED, ANNOTATED]	PANS_07_4_01554	oxidative damage protection protein	91	20	2.55954e-61	99.83	1	F:GO:0005506	F:iron ion binding
[BLASTED]	PANS_07_4_01561	DUF2884 domain-containing protein	239	20	2.84548e-172	95.68
[BLASTED, MAPPED, ANNOTATED]	PANS_07_4_01569	YggS family pyridoxal phosphate-dependent enzyme	236	20	2.59789e-173	96.26	1	F:GO:0030170	F:pyridoxal phosphate binding
[BLASTED, MAPPED, ANNOTATED]	PANS_07_4_01580	biosynthetic arginine decarboxylase	660	20	0	98.85	5	P:GO:0006527; P:GO:0008295; P:GO:0009446; F:GO:0008792; F:GO:0046872	P:arginine catabolic process; P:spermidine biosynthetic process; P:putrescine biosynthetic process; F:arginine decarboxylase activity; F:metal ion binding	EC:4.1.1; EC:4.1; EC:4; EC:4.1.1.19	Carbon-carbon lyases; Carbon-carbon lyases; Lyases; Arginine decarboxylase
[BLASTED, MAPPED, ANNOTATED]	PANS_07_4_01600	glycine cleavage system protein GcvH	129	20	2.43115e-87	95.94	2	P:GO:0019464; C:GO:0005960	P:glycine decarboxylation via glycine cleavage system; C:glycine cleavage complex
[BLASTED]	PANS_07_4_01607	FAD assembly factor SdhE	89	20	4.07942e-59	98.41
[BLASTED, MAPPED, ANNOTATED]	PANS_07_4_01610	bifunctional protein-disulfide isomerase/oxidoreductase DsbC	238	20	6.57632e-176	96.81	2	F:GO:0016853; C:GO:0042597	F:isomerase activity; C:periplasmic space	EC:5	Isomerases
[BLASTED, MAPPED, ANNOTATED]	PANS_07_4_01612	Peptide chain release factor 2	365	20	0	97.82	3	P:GO:0006415; F:GO:0016149; C:GO:0005737	P:translational termination; F:translation release factor activity, codon specific; C:cytoplasm
[BLASTED, MAPPED, ANNOTATED]	PANS_07_4_01676	amino acid ABC transporter permease	214	20	6.54427e-147	97.79	4	P:GO:0006865; P:GO:0055085; F:GO:0022857; C:GO:0043190	P:amino acid transport; P:transmembrane transport; F:transmembrane transporter activity; C:ATP-binding cassette (ABC) transporter complex	EC:7	Translocases
[BLASTED, MAPPED, ANNOTATED]	PANS_07_4_01693	5'/3'-nucleotidase SurE	254	20	0	97.09	7	P:GO:0016311; F:GO:0000166; F:GO:0004309; F:GO:0008253; F:GO:0008254; F:GO:0046872; C:GO:0005737	P:dephosphorylation; F:nucleotide binding; F:exopolyphosphatase activity; F:5'-nucleotidase activity; F:3'-nucleotidase activity; F:metal ion binding; C:cytoplasm	EC:3.6.1.11; EC:3.6.1; EC:3.1; EC:3.6; EC:3; EC:3.1.3.6; EC:3.1.3.5; EC:3.1.3.31; EC:3.1.3	Exopolyphosphatase; Acting on acid anhydrides; Acting on ester bonds; Acting on acid anhydrides; Hydrolases; 3'-nucleotidase; 5'-nucleotidase; Nucleotidase; Acting on ester bonds
[BLASTED, MAPPED, ANNOTATED]	PANS_07_4_01720	MULTISPECIES: hypothetical protein	185	20	2.30885e-131	89.95	1	C:GO:0016021	C:integral component of membrane
[BLASTED, MAPPED, ANNOTATED]	PANS_07_4_01753	spermidine N1-acetyltransferase	182	20	2.18773e-131	98.26	1	F:GO:0004145	F:diamine N-acetyltransferase activity	EC:2.3; EC:2; EC:2.3.1; EC:2.3.1.57	Acyltransferases; Transferases; Acyltransferases; Diamine N-acetyltransferase
[BLASTED, MAPPED, ANNOTATED]	PANS_07_4_01817	elongation factor 4	600	20	0	99.19	7	P:GO:0006414; P:GO:0045727; F:GO:0003746; F:GO:0003924; F:GO:0005525; F:GO:0043022; C:GO:0005886	P:translational elongation; P:positive regulation of translation; F:translation elongation factor activity; F:GTPase activity; F:GTP binding; F:ribosome binding; C:plasma membrane	EC:3.6.1; EC:3.6; EC:3; EC:3.6.1.15	Acting on acid anhydrides; Acting on acid anhydrides; Hydrolases; Nucleoside-triphosphate phosphatase
[BLASTED, MAPPED, ANNOTATED]	PANS_07_4_01828	tRNA adenosine(34) deaminase TadA	176	20	4.43388e-125	97.63	3	P:GO:0002100; F:GO:0008270; F:GO:0052717	P:tRNA wobble adenosine to inosine editing; F:zinc ion binding; F:tRNA-specific adenosine-34 deaminase activity	EC:3.5.4; EC:3.5; EC:3; EC:3.5.4.4	Acting on carbon-nitrogen bonds, other than peptide bonds; Acting on carbon-nitrogen bonds, other than peptide bonds; Hydrolases; Adenosine deaminase
[BLASTED, MAPPED, ANNOTATED]	PANS_07_4_01843	inositol-1-monophosphatase	268	20	0	98.88	7	P:GO:0031564; P:GO:0046854; P:GO:0046855; F:GO:0008934; F:GO:0046872; F:GO:0052832; F:GO:0052833	P:transcription antitermination; P:phosphatidylinositol phosphorylation; P:inositol phosphate dephosphorylation; F:inositol monophosphate 1-phosphatase activity; F:metal ion binding; F:inositol monophosphate 3-phosphatase activity; F:inositol monophosphate 4-phosphatase activity	EC:3.1; EC:3.1.3.25; EC:3; EC:3.1.3	Acting on ester bonds; Inositol-phosphate phosphatase; Hydrolases; Acting on ester bonds
[BLASTED, MAPPED, ANNOTATED]	PANS_07_4_01845	Fe-S cluster assembly transcriptional regulator IscR	166	20	1.44962e-117	98.03	5	P:GO:0006355; F:GO:0003690; F:GO:0003700; F:GO:0005506; F:GO:0051537	P:regulation of transcription, DNA-templated; F:double-stranded DNA binding; F:DNA-binding transcription factor activity; F:iron ion binding; F:2 iron, 2 sulfur cluster binding
[BLASTED, MAPPED, ANNOTATED]	PANS_07_4_01846	IscS subfamily cysteine desulfurase	387	20	0	98.35	6	P:GO:0044571; F:GO:0030170; F:GO:0031071; F:GO:0046872; F:GO:0051537; C:GO:0005737	P:[2Fe-2S] cluster assembly; F:pyridoxal phosphate binding; F:cysteine desulfurase activity; F:metal ion binding; F:2 iron, 2 sulfur cluster binding; C:cytoplasm	EC:2.8.1; EC:2.8.1.7; EC:2; EC:2.8	Transferring sulfur-containing groups; Cysteine desulfurase; Transferases; Transferring sulfur-containing groups
[BLASTED, MAPPED, ANNOTATED]	PANS_07_4_01852	nucleoside-diphosphate kinase	144	20	5.74858e-101	98.71	8	P:GO:0006165; P:GO:0006183; P:GO:0006228; P:GO:0006241; F:GO:0004550; F:GO:0005524; F:GO:0046872; C:GO:0005737	P:nucleoside diphosphate phosphorylation; P:GTP biosynthetic process; P:UTP biosynthetic process; P:CTP biosynthetic process; F:nucleoside diphosphate kinase activity; F:ATP binding; F:metal ion binding; C:cytoplasm	EC:2.7; EC:2.7.4.6; EC:2; EC:2.7.4	Transferring phosphorus-containing groups; Nucleoside-diphosphate kinase; Transferases; Transferring phosphorus-containing groups
[BLASTED, MAPPED, ANNOTATED]	PANS_07_4_01866	IMP dehydrogenase	489	20	0	98.92	4	P:GO:0006177; F:GO:0000166; F:GO:0003938; F:GO:0046872	P:GMP biosynthetic process; F:nucleotide binding; F:IMP dehydrogenase activity; F:metal ion binding	EC:1.1; EC:1.1.1.205; EC:1; EC:1.1.1	Acting on the CH-OH group of donors; IMP dehydrogenase; Oxidoreductases; Acting on the CH-OH group of donors
[BLASTED, MAPPED, ANNOTATED]	PANS_07_4_01867	glutamine-hydrolyzing GMP synthase	527	20	0	99.24	6	P:GO:0006177; P:GO:0006541; F:GO:0003922; F:GO:0005524; F:GO:0008483; F:GO:0016462	P:GMP biosynthetic process; P:glutamine metabolic process; F:GMP synthase (glutamine-hydrolyzing) activity; F:ATP binding; F:transaminase activity; F:pyrophosphatase activity	EC:2.6.1; EC:3.6.1; EC:6.3; EC:2; EC:6.3.5.2; EC:3.6; EC:2.6; EC:3; EC:6; EC:6.3.5	Transferring nitrogenous groups; Acting on acid anhydrides; Forming carbon-nitrogen bonds; Transferases; GMP synthase (glutamine-hydrolyzing); Acting on acid anhydrides; Transferring nitrogenous groups; Hydrolases; Ligases; Forming carbon-nitrogen bonds
[BLASTED, MAPPED, ANNOTATED]	PANS_07_4_01899	thioredoxin-dependent thiol peroxidase	156	20	3.36791e-112	98.61	3	P:GO:0098869; F:GO:0004601; F:GO:0051920	P:cellular oxidant detoxification; F:peroxidase activity; F:peroxiredoxin activity	EC:1.11; EC:1; EC:1.11.1; EC:1.11.1.15	Acting on a peroxide as acceptor; Oxidoreductases; Acting on a peroxide as acceptor; Acting on a peroxide as acceptor
[BLASTED, MAPPED, ANNOTATED]	PANS_07_4_01900	glycine cleavage system transcriptional repressor	205	20	1.18685e-149	95.97	1	C:GO:0016021	C:integral component of membrane
[BLASTED]	PANS_07_4_01909	ArsC family reductase	123	20	7.02582e-85	93.23
[BLASTED, MAPPED, ANNOTATED]	PANS_07_4_01921	ABC transporter permease	330	20	0	96.75	4	P:GO:0055085; F:GO:0022857; C:GO:0005886; C:GO:0016021	P:transmembrane transport; F:transmembrane transporter activity; C:plasma membrane; C:integral component of membrane	EC:7	Translocases
[BLASTED, MAPPED, ANNOTATED]	PANS_07_4_01945	PTS glucose transporter subunit IIA	167	20	3.45562e-110	98.62	4	P:GO:0009401; P:GO:0034219; F:GO:0008982; F:GO:0103111	P:phosphoenolpyruvate-dependent sugar phosphotransferase system; P:carbohydrate transmembrane transport; F:protein-N(PI)-phosphohistidine-sugar phosphotransferase activity; F:D-glucosamine PTS permease activity	EC:2.7.1; EC:2.7; EC:2; EC:7; EC:2.7.1.69	Transferring phosphorus-containing groups; Transferring phosphorus-containing groups; Transferases; Translocases; Transferring phosphorus-containing groups
[BLASTED, MAPPED, ANNOTATED]	PANS_07_4_01947	phosphocarrier protein Hpr	86	20	6.70449e-53	99.12	3	P:GO:0009401; F:GO:0016740; C:GO:0005737	P:phosphoenolpyruvate-dependent sugar phosphotransferase system; F:transferase activity; C:cytoplasm	EC:2	Transferases
[BLASTED, MAPPED, ANNOTATED]	PANS_07_4_01958	formate/nitrite transporter family protein	263	20	0	96.74	3	P:GO:0055085; F:GO:0022857; C:GO:0016021	P:transmembrane transport; F:transmembrane transporter activity; C:integral component of membrane	EC:7	Translocases
[BLASTED, MAPPED, ANNOTATED]	PANS_07_4_01966	Nramp family divalent metal transporter	414	20	0	97.44	7	P:GO:0030001; P:GO:0055085; F:GO:0015293; F:GO:0046872; F:GO:0046873; C:GO:0005886; C:GO:0016021	P:metal ion transport; P:transmembrane transport; F:symporter activity; F:metal ion binding; F:metal ion transmembrane transporter activity; C:plasma membrane; C:integral component of membrane	EC:7	Translocases
[BLASTED, MAPPED, ANNOTATED]	PANS_07_4_01971	glucokinase	322	20	0	97.71	7	P:GO:0006096; P:GO:0051156; F:GO:0004340; F:GO:0005524; F:GO:0005536; C:GO:0005737; C:GO:0016021	P:glycolytic process; P:glucose 6-phosphate metabolic process; F:glucokinase activity; F:ATP binding; F:glucose binding; C:cytoplasm; C:integral component of membrane	EC:2.7.1; EC:2.7; EC:2; EC:2.7.1.2; EC:2.7.1.1	Transferring phosphorus-containing groups; Transferring phosphorus-containing groups; Transferases; Glucokinase; Hexokinase
[BLASTED]	PANS_07_4_01981	membrane lipoprotein lipid attachment site-containing protein	94	20	2.22485e-63	91.12
[BLASTED]	PANS_07_4_01985	DUF2767 family protein	80	20	1.75277e-50	94.9
[BLASTED]	PANS_07_4_01986	hypothetical protein C7433_103203	85	1	1.24179e-53	100
[BLASTED, MAPPED, ANNOTATED]	PANS_07_4_01992	sugar ABC transporter permease	304	20	0	97.48	3	P:GO:0055085; C:GO:0005886; C:GO:0016021	P:transmembrane transport; C:plasma membrane; C:integral component of membrane
[BLASTED]	PANS_07_4_02003	Uncharacterised protein	214	20	6.47279e-154	98.29
[BLASTED, MAPPED, ANNOTATED]	PANS_07_4_02084	phospholipid-binding lipoprotein MlaA	255	20	0	96.65	1	C:GO:0016020	C:membrane
[BLASTED]	PANS_07_4_02086	YfcZ/YiiS family protein	99	20	7.43972e-64	92.91
[BLASTED, MAPPED, ANNOTATED]	PANS_07_4_02087	acetyl-CoA C-acyltransferase FadI	437	20	0	98.13	3	P:GO:0006635; F:GO:0003988; C:GO:0005737	P:fatty acid beta-oxidation; F:acetyl-CoA C-acyltransferase activity; C:cytoplasm	EC:2.3; EC:2; EC:2.3.1.16; EC:2.3.1	Acyltransferases; Transferases; Acetyl-CoA C-acyltransferase; Acyltransferases
[BLASTED, MAPPED, ANNOTATED]	PANS_07_4_02090	HAMP domain-containing protein	607	20	0	96.16	4	P:GO:0006935; P:GO:0007165; F:GO:0004888; C:GO:0016021	P:chemotaxis; P:signal transduction; F:transmembrane signaling receptor activity; C:integral component of membrane
[BLASTED, MAPPED, ANNOTATED]	PANS_07_4_02092	50S ribosomal protein L3 N(5)-glutamine methyltransferase	311	20	0	98.4	6	P:GO:0018364; P:GO:0032775; F:GO:0003676; F:GO:0009007; F:GO:0036009; C:GO:0005840	P:peptidyl-glutamine methylation; P:DNA methylation on adenine; F:nucleic acid binding; F:site-specific DNA-methyltransferase (adenine-specific) activity; F:protein-glutamine N-methyltransferase activity; C:ribosome	EC:2.1; EC:2; EC:2.1.1.72; EC:2.1.1	Transferring one-carbon groups; Transferases; Site-specific DNA-methyltransferase (adenine-specific); Transferring one-carbon groups
[BLASTED, MAPPED, ANNOTATED]	PANS_07_4_02106	transcriptional regulator TctD	224	20	4.7978e-157	98.48	3	P:GO:0000160; P:GO:0006355; F:GO:0003677	P:phosphorelay signal transduction system; P:regulation of transcription, DNA-templated; F:DNA binding
[BLASTED, MAPPED, ANNOTATED]	PANS_07_4_02118	UbiX family flavin prenyltransferase	190	20	8.7422e-134	97.35	2	F:GO:0016829; F:GO:0106141	F:lyase activity; F:flavin prenyltransferase activity	EC:2.5.1; EC:2.5; EC:2; EC:4; EC:2.5.1.129	Transferring alkyl or aryl groups, other than methyl groups; Transferring alkyl or aryl groups, other than methyl groups; Transferases; Lyases; Flavin prenyltransferase
[BLASTED, MAPPED, ANNOTATED]	PANS_07_4_02129	NUDIX hydrolase YfcD	175	20	2.73117e-126	97.33	3	F:GO:0016817; F:GO:0016853; F:GO:0046872	F:hydrolase activity, acting on acid anhydrides; F:isomerase activity; F:metal ion binding	EC:3.6; EC:3; EC:5	Acting on acid anhydrides; Hydrolases; Isomerases
[BLASTED, MAPPED, ANNOTATED]	PANS_07_4_02141	5'-deoxynucleotidase	200	20	1.66675e-145	98.72	5	P:GO:0016311; F:GO:0000166; F:GO:0002953; F:GO:0046872; C:GO:0005737	P:dephosphorylation; F:nucleotide binding; F:5'-deoxynucleotidase activity; F:metal ion binding; C:cytoplasm	EC:3.1; EC:3; EC:3.1.3	Acting on ester bonds; Hydrolases; Acting on ester bonds
[BLASTED, MAPPED, ANNOTATED]	PANS_07_4_02146	NADH-quinone oxidoreductase subunit B	226	20	1.08329e-168	99.73	6	P:GO:0022900; F:GO:0005506; F:GO:0008137; F:GO:0048038; F:GO:0051539; C:GO:0005886	P:electron transport chain; F:iron ion binding; F:NADH dehydrogenase (ubiquinone) activity; F:quinone binding; F:4 iron, 4 sulfur cluster binding; C:plasma membrane	EC:7.1.1.2; EC:1.6; EC:1; EC:1.6.5.11; EC:1.6.5; EC:1.6.99.3; EC:1.6.5.2	NADH:ubiquinone reductase (H(+)-translocating); Acting on NADH or NADPH; Oxidoreductases; NADH dehydrogenase (quinone); Acting on NADH or NADPH; NADH dehydrogenase; NAD(P)H dehydrogenase (quinone)
[BLASTED, MAPPED, ANNOTATED]	PANS_07_4_02152	NADH-quinone oxidoreductase subunit NuoI	181	20	5.95498e-131	99.47	5	F:GO:0005506; F:GO:0048038; F:GO:0050136; F:GO:0051539; C:GO:0005886	F:iron ion binding; F:quinone binding; F:NADH dehydrogenase (quinone) activity; F:4 iron, 4 sulfur cluster binding; C:plasma membrane	EC:1.6; EC:1; EC:1.6.5.11; EC:1.6.5; EC:1.6.99.3; EC:1.6.5.2	Acting on NADH or NADPH; Oxidoreductases; NADH dehydrogenase (quinone); Acting on NADH or NADPH; NADH dehydrogenase; NAD(P)H dehydrogenase (quinone)
[BLASTED, MAPPED, ANNOTATED]	PANS_07_4_02161	stress response protein ElaB	104	20	1.56702e-67	95.39	3	F:GO:0043022; C:GO:0005886; C:GO:0016021	F:ribosome binding; C:plasma membrane; C:integral component of membrane
[BLASTED, MAPPED, ANNOTATED]	PANS_07_4_02193	replication initiation negative regulator SeqA	184	20	7.84627e-134	94.89	4	P:GO:0006355; P:GO:0032297; F:GO:0003677; C:GO:0005737	P:regulation of transcription, DNA-templated; P:negative regulation of DNA-dependent DNA replication initiation; F:DNA binding; C:cytoplasm
[BLASTED, MAPPED, ANNOTATED]	PANS_07_4_02197	carboxymuconolactone decarboxylase family protein	157	20	3.97065e-110	90.07	3	P:GO:0098869; F:GO:0004601; F:GO:0051920	P:cellular oxidant detoxification; F:peroxidase activity; F:peroxiredoxin activity	EC:1.11; EC:1; EC:1.11.1; EC:1.11.1.15	Acting on a peroxide as acceptor; Oxidoreductases; Acting on a peroxide as acceptor; Acting on a peroxide as acceptor
[BLASTED, MAPPED, ANNOTATED]	PANS_07_4_02212	succinate dehydrogenase membrane anchor subunit	116	20	1.9848e-72	97.04	8	P:GO:0006099; P:GO:0022900; F:GO:0000104; F:GO:0009055; F:GO:0020037; F:GO:0046872; C:GO:0005886; C:GO:0016021	P:tricarboxylic acid cycle; P:electron transport chain; F:succinate dehydrogenase activity; F:electron transfer activity; F:heme binding; F:metal ion binding; C:plasma membrane; C:integral component of membrane	EC:1.3; EC:1	Acting on the CH-CH group of donors; Oxidoreductases
[BLASTED, MAPPED, ANNOTATED]	PANS_07_4_02213	succinate dehydrogenase flavoprotein subunit	589	20	0	99.22	5	P:GO:0006099; P:GO:0022900; F:GO:0008177; F:GO:0050660; C:GO:0005886	P:tricarboxylic acid cycle; P:electron transport chain; F:succinate dehydrogenase (ubiquinone) activity; F:flavin adenine dinucleotide binding; C:plasma membrane	EC:1.3.5; EC:1.3; EC:1; EC:1.3.5.1	Acting on the CH-CH group of donors; Acting on the CH-CH group of donors; Oxidoreductases; Succinate dehydrogenase (quinone)
[BLASTED, MAPPED, ANNOTATED]	PANS_07_4_02214	succinate dehydrogenase iron-sulfur subunit	239	20	5.57228e-177	99.05	8	P:GO:0006099; P:GO:0022900; F:GO:0008177; F:GO:0009055; F:GO:0046872; F:GO:0051537; F:GO:0051538; F:GO:0051539	P:tricarboxylic acid cycle; P:electron transport chain; F:succinate dehydrogenase (ubiquinone) activity; F:electron transfer activity; F:metal ion binding; F:2 iron, 2 sulfur cluster binding; F:3 iron, 4 sulfur cluster binding; F:4 iron, 4 sulfur cluster binding	EC:1.3.5; EC:1.3; EC:1; EC:1.3.5.1	Acting on the CH-CH group of donors; Acting on the CH-CH group of donors; Oxidoreductases; Succinate dehydrogenase (quinone)
[BLASTED, MAPPED, ANNOTATED]	PANS_07_4_02222	cyd operon protein YbgE	98	20	1.73141e-61	86.04	1	C:GO:0016021	C:integral component of membrane
[BLASTED, MAPPED, ANNOTATED]	PANS_07_4_02223	tol-pal system-associated acyl-CoA thioesterase	135	20	1.17372e-94	99.03	1	F:GO:0047617	F:acyl-CoA hydrolase activity	EC:3.1; EC:3; EC:3.1.2.20; EC:3.1.2	Acting on ester bonds; Hydrolases; Acyl-CoA hydrolase; Acting on ester bonds
[BLASTED, MAPPED, ANNOTATED]	PANS_07_4_02232	methylated-DNA--[protein]-cysteine S-methyltransferase	170	20	4.3418e-121	93.93	4	P:GO:0006307; P:GO:0032259; F:GO:0003908; C:GO:0005737	P:DNA dealkylation involved in DNA repair; P:methylation; F:methylated-DNA-[protein]-cysteine S-methyltransferase activity; C:cytoplasm	EC:2.1; EC:2; EC:2.1.1.63; EC:2.1.1	Transferring one-carbon groups; Transferases; Methylated-DNA--[protein]-cysteine S-methyltransferase; Transferring one-carbon groups
[BLASTED, MAPPED, ANNOTATED]	PANS_07_4_02252	kinase inhibitor	159	20	4.27588e-112	98.57	2	P:GO:0016310; F:GO:0016301	P:phosphorylation; F:kinase activity	EC:2.7; EC:2	Transferring phosphorus-containing groups; Transferases
[BLASTED, MAPPED, ANNOTATED]	PANS_07_4_02263	cyclic pyranopterin monophosphate synthase MoaC	162	20	2.70684e-114	96.74	2	P:GO:0006777; F:GO:0061799	P:Mo-molybdopterin cofactor biosynthetic process; F:cyclic pyranopterin monophosphate synthase activity	EC:4; EC:4.6; EC:4.6.1.17	Lyases; Phosphorus-oxygen lyases; Cyclic pyranopterin monophosphate synthase
[BLASTED, MAPPED, ANNOTATED]	PANS_07_4_02264	molybdopterin synthase sulfur carrier subunit	82	20	4.59138e-51	92.53	2	P:GO:0006777; F:GO:0061799	P:Mo-molybdopterin cofactor biosynthetic process; F:cyclic pyranopterin monophosphate synthase activity	EC:4; EC:4.6; EC:4.6.1.17	Lyases; Phosphorus-oxygen lyases; Cyclic pyranopterin monophosphate synthase
[BLASTED, MAPPED, ANNOTATED]	PANS_07_4_02265	molybdopterin synthase catalytic subunit MoaE	151	20	2.2088e-107	96.37	2	P:GO:0006777; F:GO:0030366	P:Mo-molybdopterin cofactor biosynthetic process; F:molybdopterin synthase activity	EC:2.8.1; EC:2; EC:2.8.1.12; EC:2.8	Transferring sulfur-containing groups; Transferases; Molybdopterin synthase; Transferring sulfur-containing groups
[BLASTED, MAPPED, ANNOTATED]	PANS_07_4_02272	YbhQ family protein	131	20	1.7184e-88	95.23	1	C:GO:0016021	C:integral component of membrane
[BLASTED, MAPPED, ANNOTATED]	PANS_07_4_02281	DedA family protein	193	20	7.75311e-133	95.34	1	C:GO:0016021	C:integral component of membrane
[BLASTED, MAPPED, ANNOTATED]	PANS_07_4_02289	isopentenyl-diphosphate delta-isomerase	178	20	1.29617e-130	96.43	6	P:GO:0008299; P:GO:0050992; F:GO:0004452; F:GO:0016787; F:GO:0046872; C:GO:0005737	P:isoprenoid biosynthetic process; P:dimethylallyl diphosphate biosynthetic process; F:isopentenyl-diphosphate delta-isomerase activity; F:hydrolase activity; F:metal ion binding; C:cytoplasm	EC:5.3.3.2; EC:5.3; EC:3; EC:5; EC:5.3.3	Isopentenyl-diphosphate Delta-isomerase; Intramolecular oxidoreductases; Hydrolases; Isomerases; Intramolecular oxidoreductases
[BLASTED, MAPPED, ANNOTATED]	PANS_07_4_02290	ABC transporter substrate-binding protein	304	20	0	97.08	3	P:GO:0055085; F:GO:0022857; C:GO:0043190	P:transmembrane transport; F:transmembrane transporter activity; C:ATP-binding cassette (ABC) transporter complex	EC:7	Translocases
[BLASTED, MAPPED, ANNOTATED]	PANS_07_4_02291	ABC transporter permease	377	20	0	95.69	3	P:GO:0055085; C:GO:0005886; C:GO:0016021	P:transmembrane transport; C:plasma membrane; C:integral component of membrane
[BLASTED, MAPPED, ANNOTATED]	PANS_07_4_02297	GNAT family N-acetyltransferase	173	20	2.07726e-121	90.35	2	F:GO:0008080; C:GO:0005840	F:N-acetyltransferase activity; C:ribosome	EC:2.3; EC:2; EC:2.3.1	Acyltransferases; Transferases; Acyltransferases
[BLASTED, MAPPED, ANNOTATED]	PANS_07_4_02310	23S rRNA (adenine(1618)-N(6))-methyltransferase RlmF	308	20	0	98.13	4	P:GO:0031167; F:GO:0003676; F:GO:0052907; C:GO:0005737	P:rRNA methylation; F:nucleic acid binding; F:23S rRNA (adenine(1618)-N(6))-methyltransferase activity; C:cytoplasm	EC:2.1; EC:2.1.1.181; EC:2; EC:2.1.1	Transferring one-carbon groups; 23S rRNA (adenine(1618)-N(6))-methyltransferase; Transferases; Transferring one-carbon groups
[BLASTED, MAPPED, ANNOTATED]	PANS_07_4_02318	manganese-binding transcriptional regulator MntR	153	20	1.8574e-105	98.21	5	P:GO:0006355; F:GO:0003677; F:GO:0003700; F:GO:0046914; F:GO:0046983	P:regulation of transcription, DNA-templated; F:DNA binding; F:DNA-binding transcription factor activity; F:transition metal ion binding; F:protein dimerization activity
[BLASTED, MAPPED, ANNOTATED]	PANS_07_4_02320	HlyD family secretion protein	383	20	0	97.5	2	P:GO:0055085; C:GO:0016021	P:transmembrane transport; C:integral component of membrane
[BLASTED]	PANS_07_4_02345	YbjN domain-containing protein	160	20	3.87002e-112	98.27
[BLASTED, MAPPED, ANNOTATED]	PANS_07_4_02346	spermidine/putrescine ABC transporter substrate-binding protein PotF	370	20	0	98.58	3	P:GO:0015846; F:GO:0019808; C:GO:0042597	P:polyamine transport; F:polyamine binding; C:periplasmic space
[BLASTED, MAPPED, ANNOTATED]	PANS_07_4_02348	putrescine ABC transporter permease PotH	321	20	0	98.61	3	P:GO:0055085; C:GO:0005886; C:GO:0016021	P:transmembrane transport; C:plasma membrane; C:integral component of membrane
[BLASTED, MAPPED, ANNOTATED]	PANS_07_4_02349	putrescine ABC transporter permease PotI	282	20	0	99.09	3	P:GO:0055085; C:GO:0005886; C:GO:0016021	P:transmembrane transport; C:plasma membrane; C:integral component of membrane
[BLASTED, MAPPED, ANNOTATED]	PANS_07_4_02356	arginine ABC transporter ATP-binding protein ArtP	243	20	9.63826e-179	99.4	5	P:GO:0003333; F:GO:0005524; F:GO:0015424; F:GO:0042626; C:GO:0016020	P:amino acid transmembrane transport; F:ATP binding; F:ATPase-coupled amino acid transmembrane transporter activity; F:ATPase-coupled transmembrane transporter activity; C:membrane	EC:3.6.1; EC:3.6; EC:3; EC:7.2.2; EC:7; EC:3.6.1.15	Acting on acid anhydrides; Acting on acid anhydrides; Hydrolases; Catalysing the translocation of inorganic cations; Translocases; Nucleoside-triphosphate phosphatase
[BLASTED, MAPPED, ANNOTATED]	PANS_07_4_02359	N-acetylmuramoyl-L-alanine amidase	267	20	0	94.46	2	P:GO:0009253; F:GO:0008745	P:peptidoglycan catabolic process; F:N-acetylmuramoyl-L-alanine amidase activity	EC:3.5.1; EC:3.5; EC:3; EC:3.5.1.28	Acting on carbon-nitrogen bonds, other than peptide bonds; Acting on carbon-nitrogen bonds, other than peptide bonds; Hydrolases; N-acetylmuramoyl-L-alanine amidase
[BLASTED, MAPPED, ANNOTATED]	PANS_07_4_02364	Cold shock-like protein CspD	75	20	2.34861e-48	96.14	3	P:GO:0006355; F:GO:0003677; C:GO:0005737	P:regulation of transcription, DNA-templated; F:DNA binding; C:cytoplasm
[BLASTED, MAPPED, ANNOTATED]	PANS_07_4_02365	ATP-dependent Clp protease adapter ClpS	107	20	2.91271e-74	96.08	3	P:GO:0006508; P:GO:0030163; F:GO:0008233	P:proteolysis; P:protein catabolic process; F:peptidase activity	EC:3.4; EC:3	Acting on peptide bonds (peptidases); Hydrolases
[BLASTED, MAPPED, ANNOTATED]	PANS_07_4_02367	translation initiation factor IF-1	73	20	2.1248e-45	99.72	7	P:GO:0006413; F:GO:0003743; F:GO:0005515; F:GO:0016787; F:GO:0019843; F:GO:0043022; C:GO:0005829	P:translational initiation; F:translation initiation factor activity; F:protein binding; F:hydrolase activity; F:rRNA binding; F:ribosome binding; C:cytosol	EC:3	Hydrolases
[BLASTED, MAPPED, ANNOTATED]	PANS_07_4_02372	leucine-responsive transcriptional regulator Lrp	165	20	6.83455e-116	99.6	1	F:GO:0043565	F:sequence-specific DNA binding
[BLASTED, MAPPED, ANNOTATED]	PANS_07_4_02374	outer membrane lipoprotein chaperone LolA	204	20	4.03966e-147	97.31	3	P:GO:0042953; P:GO:0044874; C:GO:0042597	P:lipoprotein transport; P:lipoprotein localization to outer membrane; C:periplasmic space
[BLASTED, MAPPED, ANNOTATED]	PANS_07_4_02380	formate transporter FocA	287	20	0	96.16	4	P:GO:0015724; P:GO:0055085; F:GO:0015499; C:GO:0016021	P:formate transport; P:transmembrane transport; F:formate transmembrane transporter activity; C:integral component of membrane	EC:7	Translocases
[BLASTED, MAPPED, ANNOTATED]	PANS_07_4_02385	30S ribosomal protein S1	570	20	0	99.65	4	P:GO:0006412; F:GO:0003723; F:GO:0003735; C:GO:0005840	P:translation; F:RNA binding; F:structural constituent of ribosome; C:ribosome
[BLASTED, MAPPED, ANNOTATED]	PANS_07_4_02386	integration host factor subunit beta	95	20	7.58109e-63	99.57	5	P:GO:0006310; P:GO:0006355; P:GO:0006417; F:GO:0003677; C:GO:0005694	P:DNA recombination; P:regulation of transcription, DNA-templated; P:regulation of translation; F:DNA binding; C:chromosome
[BLASTED, MAPPED, ANNOTATED]	PANS_07_4_02419	paraquat-inducible protein B	548	20	0	98.27	1	C:GO:0016021	C:integral component of membrane
[BLASTED, MAPPED, ANNOTATED]	PANS_07_4_02421	bifunctional 3-hydroxydecanoyl-ACP dehydratase/trans-2-decenoyl-ACP isomerase	173	20	7.58384e-121	98.14	7	P:GO:0006633; F:GO:0004317; F:GO:0008659; F:GO:0008693; F:GO:0034017; F:GO:0047451; C:GO:0005737	P:fatty acid biosynthetic process; F:3-hydroxypalmitoyl-[acyl-carrier-protein] dehydratase activity; F:(3R)-hydroxymyristoyl-[acyl-carrier-protein] dehydratase activity; F:3-hydroxydecanoyl-[acyl-carrier-protein] dehydratase activity; F:trans-2-decenoyl-acyl-carrier-protein isomerase activity; F:3-hydroxyoctanoyl-[acyl-carrier-protein] dehydratase activity; C:cytoplasm	EC:4.2.1; EC:5.3.3.14; EC:5.3.3; EC:2.3.1.85; EC:2.3; EC:4.2; EC:2; EC:5.3; EC:4; EC:4.2.1.59; EC:5; EC:2.3.1	Carbon-oxygen lyases; Trans-2-decenoyl-[acyl-carrier-protein] isomerase; Intramolecular oxidoreductases; Fatty-acid synthase system; Acyltransferases; Carbon-oxygen lyases; Transferases; Intramolecular oxidoreductases; Lyases; 3-hydroxyacyl-[acyl-carrier-protein] dehydratase; Isomerases; Acyltransferases
[BLASTED, MAPPED, ANNOTATED]	PANS_07_4_02448	autoinducer synthase	204	20	1.01546e-146	97.43	2	P:GO:0009372; F:GO:0061579	P:quorum sensing; F:N-acyl homoserine lactone synthase activity	EC:2.3; EC:2.3.1.184; EC:2; EC:2.3.1	Acyltransferases; Acyl-homoserine-lactone synthase; Transferases; Acyltransferases
[BLASTED, MAPPED, ANNOTATED]	PANS_07_4_03011	hypothetical protein HA47_06970	76	5	4.30108e-46	99.73	1	C:GO:0016021	C:integral component of membrane
[BLASTED, MAPPED, ANNOTATED]	PANS_07_4_03029	molecular chaperone	247	20	0	86.21	3	P:GO:0061077; P:GO:0071555; C:GO:0030288	P:chaperone-mediated protein folding; P:cell wall organization; C:outer membrane-bounded periplasmic space
[BLASTED, MAPPED, ANNOTATED]	PANS_07_4_03032	hypothetical protein C7433_1011276	210	16	1.08723e-151	88.14	1	C:GO:0016021	C:integral component of membrane
[BLASTED, MAPPED, ANNOTATED]	PANS_07_4_03034	fimbrial protein	284	20	0	68.23	2	P:GO:0007155; C:GO:0009289	P:cell adhesion; C:pilus
[BLASTED]	PANS_07_4_03053	ABC transporter substrate-binding protein	365	20	0	95.49
[BLASTED, MAPPED, ANNOTATED]	PANS_07_4_03061	cold-shock protein	70	20	8.10752e-42	99.64	3	F:GO:0003677; C:GO:0005737; C:GO:0016021	F:DNA binding; C:cytoplasm; C:integral component of membrane
[BLASTED, MAPPED, ANNOTATED]	PANS_07_4_03068	D-alanyl-D-alanine carboxypeptidase (penicillin-binding protein 5/6)	411	20	0	99.3	5	P:GO:0006508; P:GO:0008360; P:GO:0009252; P:GO:0071555; F:GO:0009002	P:proteolysis; P:regulation of cell shape; P:peptidoglycan biosynthetic process; P:cell wall organization; F:serine-type D-Ala-D-Ala carboxypeptidase activity	EC:3.4.17.11; EC:3.4.21; EC:3.4; EC:3.4.16; EC:3; EC:3.4.16.2; EC:3.4.16.6; EC:3.4.16.5; EC:3.4.16.4	Glutamate carboxypeptidase; Acting on peptide bonds (peptidases); Acting on peptide bonds (peptidases); Acting on peptide bonds (peptidases); Hydrolases; Lysosomal Pro-Xaa carboxypeptidase; Carboxypeptidase D; Carboxypeptidase C; Serine-type D-Ala-D-Ala carboxypeptidase
[BLASTED, MAPPED, ANNOTATED]	PANS_07_4_03072	23S rRNA (pseudouridine(1915)-N(3))-methyltransferase RlmH	146	20	5.8632e-103	98.86	3	P:GO:0031167; F:GO:0070038; C:GO:0005737	P:rRNA methylation; F:rRNA (pseudouridine-N3-)-methyltransferase activity; C:cytoplasm	EC:2.1; EC:2; EC:2.1.1	Transferring one-carbon groups; Transferases; Transferring one-carbon groups
[BLASTED, MAPPED, ANNOTATED]	PANS_07_4_03073	ribosome silencing factor	106	20	5.02778e-69	99	4	P:GO:0017148; P:GO:0042256; P:GO:0090071; C:GO:0005737	P:negative regulation of translation; P:mature ribosome assembly; P:negative regulation of ribosome biogenesis; C:cytoplasm
[BLASTED, MAPPED, ANNOTATED]	PANS_07_4_03079	amino acid ABC transporter ATP-binding protein	242	20	5.88832e-178	98.4	5	P:GO:0003333; F:GO:0005524; F:GO:0015424; F:GO:0042626; C:GO:0016020	P:amino acid transmembrane transport; F:ATP binding; F:ATPase-coupled amino acid transmembrane transporter activity; F:ATPase-coupled transmembrane transporter activity; C:membrane	EC:3.6.1; EC:3.6; EC:3; EC:7.2.2; EC:7; EC:3.6.1.15	Acting on acid anhydrides; Acting on acid anhydrides; Hydrolases; Catalysing the translocation of inorganic cations; Translocases; Nucleoside-triphosphate phosphatase
[BLASTED, MAPPED, ANNOTATED]	PANS_07_4_03080	glutamate/aspartate ABC transporter permease GltK	226	20	2.60302e-155	98.98	4	P:GO:0006865; P:GO:0055085; F:GO:0022857; C:GO:0043190	P:amino acid transport; P:transmembrane transport; F:transmembrane transporter activity; C:ATP-binding cassette (ABC) transporter complex	EC:7	Translocases
[BLASTED, MAPPED, ANNOTATED]	PANS_07_4_03092	mannosyltransferase	338	20	0	89.21	1	F:GO:0016757	F:transferase activity, transferring glycosyl groups	EC:2.4; EC:2	Glycosyltransferases; Transferases
[BLASTED, MAPPED, ANNOTATED]	PANS_07_4_03193	M20 family metallopeptidase	390	20	0	99.22	1	F:GO:0008777	F:acetylornithine deacetylase activity	EC:3.5.1; EC:3.5; EC:3; EC:3.5.1.16	Acting on carbon-nitrogen bonds, other than peptide bonds; Acting on carbon-nitrogen bonds, other than peptide bonds; Hydrolases; Acetylornithine deacetylase
[BLASTED]	PANS_07_4_03194	ligand-binding protein SH3	179	20	3.06202e-127	87.3
[BLASTED, MAPPED, ANNOTATED]	PANS_07_4_03195	LPS export ABC transporter permease LptG	359	20	0	98.21	2	P:GO:0055085; C:GO:0043190	P:transmembrane transport; C:ATP-binding cassette (ABC) transporter complex
[BLASTED, MAPPED, ANNOTATED]	PANS_07_4_03196	LPS export ABC transporter permease LptF	367	20	0	97.87	2	P:GO:0055085; C:GO:0043190	P:transmembrane transport; C:ATP-binding cassette (ABC) transporter complex
[BLASTED, MAPPED, ANNOTATED]	PANS_07_4_03203	ribonuclease E inhibitor RraB	141	20	4.55201e-95	95.46	4	P:GO:0060702; F:GO:0019899; F:GO:0060698; C:GO:0005737	P:negative regulation of endoribonuclease activity; F:enzyme binding; F:endoribonuclease inhibitor activity; C:cytoplasm
[BLASTED, MAPPED, ANNOTATED]	PANS_07_4_03222	SCP2 sterol-binding domain-containing protein	175	20	3.92708e-123	96.52	1	P:GO:0006744	P:ubiquinone biosynthetic process
[BLASTED, MAPPED, ANNOTATED]	PANS_07_4_03229	30S ribosomal protein S15	90	20	9.26783e-56	99.21	4	P:GO:0006412; F:GO:0003735; F:GO:0019843; C:GO:0005840	P:translation; F:structural constituent of ribosome; F:rRNA binding; C:ribosome
[BLASTED, MAPPED, ANNOTATED]	PANS_07_4_03230	tRNA pseudouridine(55) synthase TruB	315	20	0	97.9	4	P:GO:0031119; F:GO:0003723; F:GO:0016829; F:GO:0106029	P:tRNA pseudouridine synthesis; F:RNA binding; F:lyase activity; F:tRNA pseudouridine synthase activity	EC:5.4.99.12; EC:5.4.99.45; EC:5.4.99.26; EC:5.4.99.25; EC:5.4.99.28; EC:5.4.99.27; EC:5.4; EC:4; EC:5; EC:5.4.99.42; EC:5.4.99.44	tRNA pseudouridine(38-40) synthase; tRNA pseudouridine(38/39) synthase; tRNA pseudouridine(65) synthase; tRNA pseudouridine(55) synthase; tRNA pseudouridine(32) synthase; tRNA pseudouridine(13) synthase; Intramolecular transferases; Lyases; Isomerases; tRNA pseudouridine(31) synthase; Mitochondrial tRNA pseudouridine(27/28) synthase
[BLASTED, MAPPED, ANNOTATED]	PANS_07_4_03231	ribosome-binding factor A	136	20	1.6484e-92	97.44	2	P:GO:0030490; C:GO:0005737	P:maturation of SSU-rRNA; C:cytoplasm
[BLASTED, MAPPED, ANNOTATED]	PANS_07_4_03234	ribosome maturation factor RimP	144	20	9.82949e-101	98.74	2	P:GO:0042274; C:GO:0005737	P:ribosomal small subunit biogenesis; C:cytoplasm
[BLASTED, MAPPED, ANNOTATED]	PANS_07_4_03235	preprotein translocase subunit SecG	112	20	4.04535e-73	98.6	5	P:GO:0009306; P:GO:0071806; F:GO:0015450; C:GO:0005886; C:GO:0016021	P:protein secretion; P:protein transmembrane transport; F:P-P-bond-hydrolysis-driven protein transmembrane transporter activity; C:plasma membrane; C:integral component of membrane	EC:7.4.2.3; EC:7.4.2.4; EC:7	Mitochondrial protein-transporting ATPase; Chloroplast protein-transporting ATPase; Translocases
[BLASTED, MAPPED, ANNOTATED]	PANS_07_4_03236	phosphoglucosamine mutase	445	20	0	98.72	3	P:GO:0005975; F:GO:0000287; F:GO:0008966	P:carbohydrate metabolic process; F:magnesium ion binding; F:phosphoglucosamine mutase activity	EC:5.4; EC:5; EC:5.4.2.10; EC:5.4.2	Intramolecular transferases; Isomerases; Phosphoglucosamine mutase; Intramolecular transferases
[BLASTED, MAPPED, ANNOTATED]	PANS_07_4_03243	Obg family GTPase CgtA	391	20	0	98.32	5	P:GO:0042254; F:GO:0000287; F:GO:0003924; F:GO:0005525; C:GO:0005737	P:ribosome biogenesis; F:magnesium ion binding; F:GTPase activity; F:GTP binding; C:cytoplasm	EC:3.6.1; EC:3.6; EC:3; EC:3.6.1.15	Acting on acid anhydrides; Acting on acid anhydrides; Hydrolases; Nucleoside-triphosphate phosphatase
[BLASTED, MAPPED, ANNOTATED]	PANS_07_4_03245	50S ribosomal protein L21	104	20	1.42516e-67	98.98	4	P:GO:0006412; F:GO:0003735; F:GO:0019843; C:GO:0005840	P:translation; F:structural constituent of ribosome; F:rRNA binding; C:ribosome
[BLASTED, MAPPED, ANNOTATED]	PANS_07_4_03247	helix-turn-helix domain-containing protein	94	20	1.15054e-60	95.79	1	F:GO:0003677	F:DNA binding
[BLASTED, MAPPED, ANNOTATED]	PANS_07_4_03254	phospholipid ABC transporter ATP-binding protein MlaF	272	20	0	98.1	3	P:GO:0055085; F:GO:0005524; F:GO:0042626	P:transmembrane transport; F:ATP binding; F:ATPase-coupled transmembrane transporter activity	EC:3.6.1; EC:3.6; EC:3; EC:7; EC:7.2.2; EC:3.6.1.15	Acting on acid anhydrides; Acting on acid anhydrides; Hydrolases; Translocases; Catalysing the translocation of inorganic cations; Nucleoside-triphosphate phosphatase
[BLASTED, MAPPED, ANNOTATED]	PANS_07_4_03255	calcium/sodium antiporter	327	20	0	97.34	2	P:GO:0055085; C:GO:0016021	P:transmembrane transport; C:integral component of membrane
[BLASTED, MAPPED, ANNOTATED]	PANS_07_4_03257	3-deoxy-manno-octulosonate-8-phosphatase KdsC	189	20	7.03479e-133	96.33	4	P:GO:0009103; P:GO:0016311; F:GO:0019143; F:GO:0046872	P:lipopolysaccharide biosynthetic process; P:dephosphorylation; F:3-deoxy-manno-octulosonate-8-phosphatase activity; F:metal ion binding	EC:3.1; EC:3.1.3.45; EC:3; EC:3.1.3	Acting on ester bonds; 3-deoxy-manno-octulosonate-8-phosphatase; Hydrolases; Acting on ester bonds
[BLASTED, MAPPED, ANNOTATED]	PANS_07_4_03258	LPS export ABC transporter periplasmic protein LptC	194	20	2.30951e-141	94.57	4	P:GO:0015920; P:GO:0043165; F:GO:0015221; C:GO:0005887	P:lipopolysaccharide transport; P:Gram-negative-bacterium-type cell outer membrane assembly; F:lipopolysaccharide transmembrane transporter activity; C:integral component of plasma membrane	EC:7	Translocases
[BLASTED, MAPPED, ANNOTATED]	PANS_07_4_03259	lipopolysaccharide ABC transporter substrate-binding protein LptA	185	20	6.69407e-131	97.93	4	P:GO:0015920; P:GO:0043165; F:GO:0001530; C:GO:0042597	P:lipopolysaccharide transport; P:Gram-negative-bacterium-type cell outer membrane assembly; F:lipopolysaccharide binding; C:periplasmic space
[BLASTED, MAPPED, ANNOTATED]	PANS_07_4_03260	LPS export ABC transporter ATP-binding protein	242	20	1.26522e-172	99.61	5	P:GO:0055085; F:GO:0005524; F:GO:0042626; C:GO:0005737; C:GO:0043190	P:transmembrane transport; F:ATP binding; F:ATPase-coupled transmembrane transporter activity; C:cytoplasm; C:ATP-binding cassette (ABC) transporter complex	EC:3.6.1; EC:3.6; EC:3; EC:7.2.2; EC:7; EC:3.6.1.15	Acting on acid anhydrides; Acting on acid anhydrides; Hydrolases; Catalysing the translocation of inorganic cations; Translocases; Nucleoside-triphosphate phosphatase
[BLASTED, MAPPED, ANNOTATED]	PANS_07_4_03262	ribosome hibernation promoting factor	96	20	1.54168e-62	96.79	1	P:GO:0006417	P:regulation of translation
[BLASTED, MAPPED, ANNOTATED]	PANS_07_4_03265	PTS phosphocarrier protein NPr	91	20	1.18139e-56	98.5	1	F:GO:0016740	F:transferase activity	EC:2	Transferases
[BLASTED, MAPPED, ANNOTATED]	PANS_07_4_03271	stringent starvation protein A	214	20	6.19483e-154	98.08	1	P:GO:0006749	P:glutathione metabolic process
[BLASTED, MAPPED, ANNOTATED]	PANS_07_4_03273	50S ribosomal protein L13	143	20	4.01737e-100	99.86	3	P:GO:0006412; F:GO:0003735; C:GO:0005840	P:translation; F:structural constituent of ribosome; C:ribosome
[BLASTED, MAPPED, ANNOTATED]	PANS_07_4_03282	elongation factor P	189	20	1.44025e-136	98.67	3	P:GO:0006414; F:GO:0003746; C:GO:0005737	P:translational elongation; F:translation elongation factor activity; C:cytoplasm
[BLASTED, MAPPED, ANNOTATED]	PANS_07_4_03286	co-chaperone GroES	98	20	1.92855e-58	99.43	3	P:GO:0006457; F:GO:0005524; C:GO:0005737	P:protein folding; F:ATP binding; C:cytoplasm
[BLASTED, MAPPED, ANNOTATED]	PANS_07_4_03287	FxsA family protein	154	20	3.77075e-106	99.84	1	C:GO:0016021	C:integral component of membrane
[BLASTED, MAPPED, ANNOTATED]	PANS_07_4_03399	carbohydrate porin	436	20	0	98.62	5	P:GO:0008643; P:GO:0055085; F:GO:0015288; C:GO:0009279; C:GO:0046930	P:carbohydrate transport; P:transmembrane transport; F:porin activity; C:cell outer membrane; C:pore complex	EC:7	Translocases
[BLASTED, MAPPED, ANNOTATED]	PANS_07_4_03408	3-dehydro-L-gulonate 2-dehydrogenase	338	20	0	96.76	3	F:GO:0047559; F:GO:0070403; C:GO:0005737	F:3-dehydro-L-gulonate 2-dehydrogenase activity; F:NAD+ binding; C:cytoplasm	EC:1.1; EC:1; EC:1.1.1; EC:1.1.1.130	Acting on the CH-OH group of donors; Oxidoreductases; Acting on the CH-OH group of donors; 3-dehydro-L-gulonate 2-dehydrogenase
[BLASTED, MAPPED, ANNOTATED]	PANS_07_4_03418	NADPH-dependent L-lysine N(6)-monooxygenase	445	20	0	96.96	1	F:GO:0004497	F:monooxygenase activity	EC:1	Oxidoreductases
[BLASTED, MAPPED, ANNOTATED]	PANS_07_4_03475	CidA/LrgA family protein	142	20	1.10262e-90	94.61	2	C:GO:0005886; C:GO:0016021	C:plasma membrane; C:integral component of membrane
[BLASTED, MAPPED, ANNOTATED]	PANS_07_4_03480	redox-sensitive transcriptional activator SoxR	162	20	2.61917e-114	96.83	4	P:GO:0006355; P:GO:0006979; F:GO:0003677; F:GO:0051537	P:regulation of transcription, DNA-templated; P:response to oxidative stress; F:DNA binding; F:2 iron, 2 sulfur cluster binding
[BLASTED, MAPPED, ANNOTATED]	PANS_07_4_03483	teichuronopeptide biosynthesis TupA-like protein	317	20	0	99.03	1	F:GO:0016740	F:transferase activity	EC:2	Transferases
[BLASTED, MAPPED, ANNOTATED]	PANS_07_4_03491	single-stranded DNA-binding protein SSB1	181	20	9.70691e-127	97.08	4	P:GO:0006260; P:GO:0006281; P:GO:0006310; F:GO:0003697	P:DNA replication; P:DNA repair; P:DNA recombination; F:single-stranded DNA binding
[BLASTED, MAPPED, ANNOTATED]	PANS_07_4_03499	replicative DNA helicase	469	20	0	99.49	6	P:GO:0006269; P:GO:0032508; F:GO:0003677; F:GO:0003678; F:GO:0005524; C:GO:1990077	P:DNA replication, synthesis of RNA primer; P:DNA duplex unwinding; F:DNA binding; F:DNA helicase activity; F:ATP binding; C:primosome complex	EC:3.6.1; EC:3.6.4.12; EC:3.6; EC:3; EC:3.6.1.15	Acting on acid anhydrides; DNA helicase; Acting on acid anhydrides; Hydrolases; Nucleoside-triphosphate phosphatase
[BLASTED, MAPPED, ANNOTATED]	PANS_07_4_03508	diacylglycerol kinase	123	20	3.6452e-80	93.89	7	P:GO:0006654; P:GO:0016310; F:GO:0004143; F:GO:0005524; F:GO:0046872; C:GO:0005886; C:GO:0016021	P:phosphatidic acid biosynthetic process; P:phosphorylation; F:diacylglycerol kinase activity; F:ATP binding; F:metal ion binding; C:plasma membrane; C:integral component of membrane	EC:2.7.1; EC:2.7; EC:2; EC:2.7.1.107	Transferring phosphorus-containing groups; Transferring phosphorus-containing groups; Transferases; Diacylglycerol kinase (ATP)
[BLASTED]	PANS_07_4_04390	MULTISPECIES: hypothetical protein	68	20	3.45091e-42	94.69
[BLASTED, MAPPED, ANNOTATED]	PANS_07_6_00474	carboxy terminal-processing peptidase	682	20	0	99.02	2	P:GO:0006508; F:GO:0004252	P:proteolysis; F:serine-type endopeptidase activity	EC:3.4.21.73; EC:3.4.24.7; EC:3.4.21.71; EC:3.4.24.3; EC:3.4.21.34; EC:3.4.21.78; EC:3.4.21.75; EC:3.4.21.26; EC:3.4.21.27; EC:3.4.21.68; EC:3.4.21.69; EC:3.4.24.34; EC:3.4.21.41; EC:3.4.21.83; EC:3.4.21.88; EC:3.4.21.45; EC:3.4.21.89; EC:3.4.21.42; EC:3.4.19.1; EC:3.4.21.43; EC:3.4.21.87; EC:3.4.21.38; EC:3.4.21.35; EC:3.4.21.79; EC:3.4.21.36; EC:3.4.21.102; EC:3.4.21.39; EC:3.4.21; EC:3.4.21.4;…	U-plasminogen activator; Interstitial collagenase; Pancreatic elastase II; Microbial collagenase; Plasma kallikrein; Granzyme A; Furin; Prolyl oligopeptidase; Coagulation factor XIa; T-plasminogen activator; Protein C (activated); Neutrophil collagenase; Complement subcomponent C1r; Oligopeptidase B; Repressor LexA; Complement factor I; Signal peptidase I; Complement subcomponent C1s; Acylaminoac…
[BLASTED, MAPPED, ANNOTATED]	PANS_07_6_03403	FadR family transcriptional regulator	247	20	0	95.38	3	P:GO:0006355; F:GO:0003677; F:GO:0003700	P:regulation of transcription, DNA-templated; F:DNA binding; F:DNA-binding transcription factor activity
[BLASTED, MAPPED, ANNOTATED]	PANS_99_15_00020	RNA polymerase sigma factor FliA	241	20	7.0905e-171	99.17	6	P:GO:0001123; P:GO:2000142; F:GO:0003677; F:GO:0003899; F:GO:0016987; C:GO:0005737	P:transcription initiation from bacterial-type RNA polymerase promoter; P:regulation of DNA-templated transcription, initiation; F:DNA binding; F:DNA-directed 5'-3' RNA polymerase activity; F:sigma factor activity; C:cytoplasm	EC:2.7; EC:2; EC:2.7.7; EC:2.7.7.6	Transferring phosphorus-containing groups; Transferases; Transferring phosphorus-containing groups; DNA-directed RNA polymerase
[BLASTED, MAPPED, ANNOTATED]	PANS_99_15_00029	sodium/proline symporter PutP	495	20	0	97.69	7	P:GO:0006814; P:GO:0015824; P:GO:1903825; F:GO:0005298; F:GO:0031402; C:GO:0005886; C:GO:0016021	P:sodium ion transport; P:proline transport; P:organic acid transmembrane transport; F:proline:sodium symporter activity; F:sodium ion binding; C:plasma membrane; C:integral component of membrane	EC:7	Translocases
[BLASTED, MAPPED, ANNOTATED]	PANS_99_15_00638	hexitol phosphatase HxpB	223	20	2.93617e-162	94.43	2	F:GO:0016787; F:GO:0046872	F:hydrolase activity; F:metal ion binding	EC:3	Hydrolases
[BLASTED, MAPPED, ANNOTATED]	PANS_99_15_00737	MCP four helix bundle domain-containing protein	515	20	0	91.02	4	P:GO:0006935; P:GO:0007165; F:GO:0004888; C:GO:0016021	P:chemotaxis; P:signal transduction; F:transmembrane signaling receptor activity; C:integral component of membrane
[BLASTED, MAPPED, ANNOTATED]	PANS_99_15_00739	diguanylate cyclase	189	20	1.30056e-132	95.5	1	C:GO:0016021	C:integral component of membrane
[BLASTED]	PANS_99_15_00756	hypothetical protein C7433_101744	194	20	3.39782e-140	88.86
[BLASTED, MAPPED, ANNOTATED]	PANS_99_15_00758	epoxide hydrolase	386	20	0	82.9	1	F:GO:0016787	F:hydrolase activity	EC:3	Hydrolases
[BLASTED, MAPPED, ANNOTATED]	PANS_99_15_00770	cytochrome ubiquinol oxidase subunit I	454	20	0	89.87	6	P:GO:0019646; F:GO:0009055; F:GO:0046872; C:GO:0005886; C:GO:0016021; C:GO:0070069	P:aerobic electron transport chain; F:electron transfer activity; F:metal ion binding; C:plasma membrane; C:integral component of membrane; C:cytochrome complex	EC:1	Oxidoreductases
[BLASTED, MAPPED, ANNOTATED]	PANS_99_15_01514	succinate-semialdehyde dehydrogenase	458	20	0	98.95	2	F:GO:0004030; F:GO:0004777	F:aldehyde dehydrogenase [NAD(P)+] activity; F:succinate-semialdehyde dehydrogenase (NAD+) activity	EC:1.2.1.16; EC:1.2; EC:1.2.1.24; EC:1; EC:1.2.1.5; EC:1.2.1	Succinate-semialdehyde dehydrogenase (NAD(P)(+)); Acting on the aldehyde or oxo group of donors; Succinate-semialdehyde dehydrogenase (NAD(+)); Oxidoreductases; Aldehyde dehydrogenase (NAD(P)(+)); Acting on the aldehyde or oxo group of donors
[BLASTED]	PANS_99_15_03146	acyl carrier protein	86	20	2.29355e-52	96.12
[BLASTED, MAPPED, ANNOTATED]	PANS_99_15_03212	GNAT family N-acetyltransferase	166	20	4.8265e-119	97.69	1	F:GO:0008080	F:N-acetyltransferase activity	EC:2.3; EC:2; EC:2.3.1	Acyltransferases; Transferases; Acyltransferases
[BLASTED, MAPPED, ANNOTATED]	PANS_99_15_03218	2-iminobutanoate/2-iminopropanoate deaminase	129	20	2.56831e-87	98.52	1	F:GO:0016787	F:hydrolase activity	EC:3	Hydrolases
[BLASTED, MAPPED, ANNOTATED]	PANS_99_15_04153	SDR family oxidoreductase	244	20	1.96127e-173	97.24	1	F:GO:0016491	F:oxidoreductase activity	EC:1	Oxidoreductases
[BLASTED, MAPPED, ANNOTATED]	PNA_03_3_00130	peptidoglycan-associated lipoprotein Pal	174	20	1.27561e-123	95.79	4	P:GO:0007049; P:GO:0051301; C:GO:0009279; C:GO:0016021	P:cell cycle; P:cell division; C:cell outer membrane; C:integral component of membrane
[BLASTED, MAPPED, ANNOTATED]	PNA_03_3_00948	glycosyl transferase	394	20	0	95.27	1	F:GO:0016757	F:transferase activity, transferring glycosyl groups	EC:2.4; EC:2	Glycosyltransferases; Transferases
[BLASTED]	PNA_03_3_01323	DcrB-related protein	147	20	7.66266e-103	94.28
[BLASTED]	PNA_03_3_01342	MULTISPECIES: hypothetical protein	184	20	3.23902e-132	87.17
[BLASTED, MAPPED, ANNOTATED]	PNA_03_3_03113	YitT family protein	205	20	2.01541e-143	98.01	2	C:GO:0005886; C:GO:0016021	C:plasma membrane; C:integral component of membrane
[BLASTED, MAPPED, ANNOTATED]	PNA_03_3_03125	polysaccharide biosynthesis protein	419	20	0	96.96	2	C:GO:0005886; C:GO:0016021	C:plasma membrane; C:integral component of membrane
[BLASTED]	PNA_03_3_03282	DUF1493 family protein	106	20	5.68257e-72	92.01
[BLASTED, MAPPED, ANNOTATED]	PNA_14_11_00061	ABC transporter substrate-binding protein	304	20	0	97.08	3	P:GO:0055085; F:GO:0022857; C:GO:0043190	P:transmembrane transport; F:transmembrane transporter activity; C:ATP-binding cassette (ABC) transporter complex	EC:7	Translocases
[BLASTED, MAPPED, ANNOTATED]	PNA_14_11_00089	manganese-binding transcriptional regulator MntR	153	20	1.8574e-105	98.21	5	P:GO:0006355; F:GO:0003677; F:GO:0003700; F:GO:0046914; F:GO:0046983	P:regulation of transcription, DNA-templated; F:DNA binding; F:DNA-binding transcription factor activity; F:transition metal ion binding; F:protein dimerization activity
[BLASTED, MAPPED, ANNOTATED]	PNA_14_11_00165	tRNA uridine 5-oxyacetic acid(34) methyltransferase CmoM	264	20	0	97.15	2	P:GO:0030488; F:GO:0097697	P:tRNA methylation; F:tRNA 5-carboxymethoxyuridine methyltransferase activity	EC:2.1; EC:2; EC:2.1.1	Transferring one-carbon groups; Transferases; Transferring one-carbon groups
[BLASTED]	PNA_14_11_00191	membrane integrity-associated transporter subunit PqiC	195	20	2.19868e-138	96.08
[BLASTED]	PNA_14_11_01571	DUF1414 domain-containing protein	75	20	1.05476e-44	96.07
[BLASTED, MAPPED, ANNOTATED]	PNA_14_11_01866	flagellar assembly protein FliH	232	20	1.69612e-164	94.63	5	P:GO:0044781; P:GO:0071973; F:GO:0003774; C:GO:0005737; C:GO:0009288	P:bacterial-type flagellum organization; P:bacterial-type flagellum-dependent cell motility; F:motor activity; C:cytoplasm; C:bacterial-type flagellum	EC:3.6.1; EC:3.6; EC:3; EC:3.6.1.15	Acting on acid anhydrides; Acting on acid anhydrides; Hydrolases; Nucleoside-triphosphate phosphatase
[BLASTED, MAPPED, ANNOTATED]	PNA_14_11_01908	nicotinamide-nucleotide amidase	165	20	1.5425e-114	95	1	F:GO:0019159	F:nicotinamide-nucleotide amidase activity	EC:3.5.1; EC:3.5.1.42; EC:3.5; EC:3	Acting on carbon-nitrogen bonds, other than peptide bonds; Nicotinamide-nucleotide amidase; Acting on carbon-nitrogen bonds, other than peptide bonds; Hydrolases
[BLASTED, MAPPED, ANNOTATED]	PNA_14_11_01927	uroporphyrinogen-III C-methyltransferase	472	20	0	98.77	7	P:GO:0009236; P:GO:0019354; P:GO:0032259; F:GO:0004851; F:GO:0043115; F:GO:0051266; F:GO:0051287	P:cobalamin biosynthetic process; P:siroheme biosynthetic process; P:methylation; F:uroporphyrin-III C-methyltransferase activity; F:precorrin-2 dehydrogenase activity; F:sirohydrochlorin ferrochelatase activity; F:NAD binding	EC:2.1; EC:1.3; EC:1; EC:2; EC:4; EC:4.99.1.4; EC:2.1.1.107; EC:4.99.1.1; EC:1.3.1.76; EC:2.1.1; EC:1.3.1	Transferring one-carbon groups; Acting on the CH-CH group of donors; Oxidoreductases; Transferases; Lyases; Sirohydrochlorin ferrochelatase; Uroporphyrinogen-III C-methyltransferase; Protoporphyrin ferrochelatase; Precorrin-2 dehydrogenase; Transferring one-carbon groups; Acting on the CH-CH group of donors
[BLASTED]	PNA_14_11_02116	ABC transporter substrate-binding protein	334	20	0	96.97
[BLASTED]	PNA_14_11_02120	ABC transporter substrate-binding protein	300	20	0	96.1
[BLASTED]	PNA_14_11_02980	MULTISPECIES: hypothetical protein	118	20	2.59042e-81	94.32
[BLASTED, MAPPED, ANNOTATED]	PNA_14_11_03131	GNAT family N-acetyltransferase	196	20	9.57947e-143	90.84	1	F:GO:0008080	F:N-acetyltransferase activity	EC:2.3; EC:2; EC:2.3.1	Acyltransferases; Transferases; Acyltransferases
[BLASTED, MAPPED, ANNOTATED]	PNA_14_11_03132	citrate synthase	428	20	0	98.22	3	P:GO:0006099; F:GO:0004108; C:GO:0005737	P:tricarboxylic acid cycle; F:citrate (Si)-synthase activity; C:cytoplasm	EC:2.3.3.1; EC:2.3.3; EC:2.3; EC:2	Citrate (Si)-synthase; Acyltransferases; Acyltransferases; Transferases
[BLASTED, MAPPED, ANNOTATED]	PNA_14_11_03291	RNase adapter RapZ	285	20	0	98.77	3	F:GO:0003723; F:GO:0005524; F:GO:0005525	F:RNA binding; F:ATP binding; F:GTP binding
[BLASTED, MAPPED, ANNOTATED]	PNA_14_11_03292	PTS phosphocarrier protein NPr	91	20	1.18139e-56	98.5	1	F:GO:0016740	F:transferase activity	EC:2	Transferases
[BLASTED, MAPPED, ANNOTATED]	PNA_15_2_01642	cell division protein DedD	260	20	0	93.19	4	P:GO:0032506; F:GO:0042834; C:GO:0005887; C:GO:0030428	P:cytokinetic process; F:peptidoglycan binding; C:integral component of plasma membrane; C:cell septum
[BLASTED, MAPPED, ANNOTATED]	PNA_15_2_01945	HAMP domain-containing histidine kinase	362	20	0	94.75	5	P:GO:0000160; P:GO:0018106; F:GO:0000155; C:GO:0005886; C:GO:0016021	P:phosphorelay signal transduction system; P:peptidyl-histidine phosphorylation; F:phosphorelay sensor kinase activity; C:plasma membrane; C:integral component of membrane	EC:2.7.1; EC:2.7; EC:2.7.3; EC:2; EC:2.7.13.3	Transferring phosphorus-containing groups; Transferring phosphorus-containing groups; Transferring phosphorus-containing groups; Transferases; Histidine kinase
[BLASTED, MAPPED, ANNOTATED]	PNA_15_2_02119	sugar ABC transporter ATP-binding protein	495	20	0	98.63	5	P:GO:0015752; F:GO:0005524; F:GO:0015611; F:GO:0043211; C:GO:0005886	P:D-ribose transmembrane transport; F:ATP binding; F:ABC-type D-ribose transporter activity; F:ATPase-coupled carbohydrate transmembrane transporter activity; C:plasma membrane	EC:3.6.1; EC:3.6; EC:3; EC:7.2.2; EC:7; EC:3.6.1.15; EC:7.5.2.8	Acting on acid anhydrides; Acting on acid anhydrides; Hydrolases; Catalysing the translocation of inorganic cations; Translocases; Nucleoside-triphosphate phosphatase; ABC-type D-allose transporter
[BLASTED, MAPPED, ANNOTATED]	PNA_15_2_02455	M48 family metallopeptidase	252	20	0	97.03	3	P:GO:0006508; F:GO:0004222; F:GO:0046872	P:proteolysis; F:metalloendopeptidase activity; F:metal ion binding	EC:3.4.24; EC:3.4.24.61; EC:3.4.24.23; EC:3.4.24.24; EC:3.4.24.69; EC:3.4.24.64; EC:3.4.24.21; EC:3.4.24.22; EC:3.4; EC:3.4.24.17; EC:3.4.24.18; EC:3.4.24.19; EC:3.4.99; EC:3.4.24.70; EC:3.4.24.71; EC:3.4.24.72; EC:3.4.24.56; EC:3.4.24.35; EC:3.4.24.57; EC:3.4.24.14; EC:3.4.24.37; EC:3.4.24.59; EC:3.4.24.11; EC:3.4.24.55; EC:3	Acting on peptide bonds (peptidases); Nardilysin; Matrilysin; Gelatinase A; Bontoxilysin; Mitochondrial processing peptidase; Astacin; Stromelysin 2; Acting on peptide bonds (peptidases); Stromelysin 1; Meprin A; Procollagen C-endopeptidase; Acting on peptide bonds (peptidases); Oligopeptidase A; Endothelin-converting enzyme 1; Fibrolase; Insulysin; Gelatinase B; O-sialoglycoprotein endopeptidase…
[BLASTED, MAPPED, ANNOTATED]	PNA_15_2_02512	PAS domain-containing methyl-accepting chemotaxis protein	429	20	0	97.89	2	P:GO:0007165; C:GO:0016020	P:signal transduction; C:membrane
[BLASTED]	PNA_15_2_03138	3-hydroxy-fatty acyl-ACP dehydratase	159	20	1.19973e-111	89.09

## Sheet: S4
Table S4: Details of GO ids and functional categorization of each protein coding gene sequence. Number of GO ids assigned to each sequence.
Sequence id	GO id	Biological process (P), Molecular function (F), Cellular component (C)	Protein name		Sequence id	No. of Go ids
NCPPB2275_00009	GO:0005576	C	murein lipoprotein		NCPPB2275_03795	8
NCPPB2275_00009	GO:0005618	C	murein lipoprotein		PANS_07_10_02671	8
NCPPB2275_00009	GO:0009279	C	murein lipoprotein		PANS_07_4_01852	8
NCPPB2275_00009	GO:0008289	F	murein lipoprotein		PANS_07_4_02212	8
NCPPB2275_00009	GO:0042834	F	murein lipoprotein		PANS_07_4_02214	8
NCPPB2275_00009	GO:0030258	P	murein lipoprotein		PNA_03_3_00114	8
NCPPB2275_00009	GO:0043580	P	murein lipoprotein		PNA_03_3_00116	8
NCPPB2275_00026	GO:0016787	F	endopeptidase		PNA_03_3_01867	8
NCPPB2275_00028	GO:0004602	F	glutathione peroxidase		NCPPB2275_00009	7
NCPPB2275_00028	GO:0051920	F	glutathione peroxidase		NCPPB2275_03050	7
NCPPB2275_00028	GO:0006979	P	glutathione peroxidase		NCPPB2275_03059	7
NCPPB2275_00028	GO:0098869	P	glutathione peroxidase		NCPPB2281_00192	7
NCPPB2275_00030	GO:0003677	F	integration host factor subunit alpha		NCPPB2281_02946	7
NCPPB2275_00030	GO:0006310	P	integration host factor subunit alpha		PANS_07_10_00732	7
NCPPB2275_00030	GO:0006355	P	integration host factor subunit alpha		PANS_07_4_00862	7
NCPPB2275_00030	GO:0006417	P	integration host factor subunit alpha		PANS_07_4_01693	7
NCPPB2275_00032	GO:0005737	C	phenylalanine--tRNA ligase subunit alpha		PANS_07_4_01817	7
NCPPB2275_00032	GO:0000049	F	phenylalanine--tRNA ligase subunit alpha		PANS_07_4_01843	7
NCPPB2275_00032	GO:0000287	F	phenylalanine--tRNA ligase subunit alpha		PANS_07_4_01966	7
NCPPB2275_00032	GO:0004826	F	phenylalanine--tRNA ligase subunit alpha		PANS_07_4_01971	7
NCPPB2275_00032	GO:0005524	F	phenylalanine--tRNA ligase subunit alpha		PANS_07_4_02367	7
NCPPB2275_00032	GO:0006432	P	phenylalanine--tRNA ligase subunit alpha		PANS_07_4_02421	7
NCPPB2275_00033	GO:0005840	C	50S ribosomal protein L20		PANS_07_4_03508	7
NCPPB2275_00033	GO:0003735	F	50S ribosomal protein L20		PANS_99_15_00029	7
NCPPB2275_00033	GO:0019843	F	50S ribosomal protein L20		PNA_03_3_00269	7
NCPPB2275_00033	GO:0000027	P	50S ribosomal protein L20		PNA_03_3_00323	7
NCPPB2275_00033	GO:0006412	P	50S ribosomal protein L20		PNA_03_3_01747	7
NCPPB2275_00035	GO:0005737	C	translation initiation factor IF-3		PNA_03_3_01752	7
NCPPB2275_00035	GO:0003743	F	translation initiation factor IF-3		PNA_03_3_01876	7
NCPPB2275_00035	GO:0006413	P	translation initiation factor IF-3		PNA_03_3_01906	7
NCPPB2275_00042	GO:0016787	F	hexitol phosphatase HxpB		PNA_14_11_01927	7
NCPPB2275_00042	GO:0046872	F	hexitol phosphatase HxpB		NCPPB2275_00032	6
NCPPB2275_00043	GO:0016787	F	metal-dependent hydrolase		NCPPB2275_01046	6
NCPPB2275_00061	GO:0005886	C	ABC transporter permease		NCPPB2275_02908	6
NCPPB2275_00061	GO:0016021	C	ABC transporter permease		NCPPB2275_03801	6
NCPPB2275_00061	GO:0022857	F	ABC transporter permease		NCPPB2281_02937	6
NCPPB2275_00061	GO:0055085	P	ABC transporter permease		PANS_07_10_00723	6
NCPPB2275_00075	GO:0016021	C	DotU family type IV/VI secretion system protein		PANS_07_10_02105	6
NCPPB2275_00091	GO:0009279	C	lipoprotein localization protein LolB		PANS_07_10_02665	6
NCPPB2275_00091	GO:0015031	P	lipoprotein localization protein LolB		PANS_07_12_01058	6
NCPPB2275_00091	GO:0044874	P	lipoprotein localization protein LolB		PANS_07_14_02491	6
NCPPB2275_00095	GO:0016021	C	stress-induced protein YchH		PANS_07_4_00885	6
NCPPB2275_00096	GO:0005737	C	aminoacyl-tRNA hydrolase		PANS_07_4_01542	6
NCPPB2275_00096	GO:0004045	F	aminoacyl-tRNA hydrolase		PANS_07_4_01846	6
NCPPB2275_00096	GO:0006412	P	aminoacyl-tRNA hydrolase		PANS_07_4_01867	6
NCPPB2275_00099	GO:0016021	C	chemotaxis protein		PANS_07_4_02092	6
NCPPB2275_00099	GO:0004888	F	chemotaxis protein		PANS_07_4_02146	6
NCPPB2275_00099	GO:0006935	P	chemotaxis protein		PANS_07_4_02289	6
NCPPB2275_00099	GO:0007165	P	chemotaxis protein		PANS_07_4_03499	6
NCPPB2275_00197	GO:0005886	C	GlsB/YeaQ/YmgE family stress response membrane protein		PANS_99_15_00020	6
NCPPB2275_00197	GO:0016021	C	GlsB/YeaQ/YmgE family stress response membrane protein		PANS_99_15_00770	6
NCPPB2275_00245	GO:0031241	C	penicillin-binding protein activator LpoB		PNA_03_3_00191	6
NCPPB2275_00245	GO:0030234	F	penicillin-binding protein activator LpoB		PNA_03_3_01624	6
NCPPB2275_00245	GO:0008360	P	penicillin-binding protein activator LpoB		PNA_03_3_01678	6
NCPPB2275_00245	GO:0009252	P	penicillin-binding protein activator LpoB		PNA_03_3_01852	6
NCPPB2275_00245	GO:0050790	P	penicillin-binding protein activator LpoB		PNA_03_3_01873	6
NCPPB2275_00247	GO:0016787	F	purine nucleoside phosphoramidase		PNA_15_2_02495	6
NCPPB2275_00256	GO:0005737	C	Acyl carrier protein		NCPPB2275_00033	5
NCPPB2275_00256	GO:0000036	F	Acyl carrier protein		NCPPB2275_00245	5
NCPPB2275_00256	GO:0031177	F	Acyl carrier protein		NCPPB2275_00257	5
NCPPB2275_00256	GO:0006633	P	Acyl carrier protein		NCPPB2275_00268	5
NCPPB2275_00257	GO:0004316	F	3-oxoacyl-ACP reductase FabG		NCPPB2275_00598	5
NCPPB2275_00257	GO:0051287	F	3-oxoacyl-ACP reductase FabG		NCPPB2275_01020	5
NCPPB2275_00257	GO:0102131	F	3-oxoacyl-ACP reductase FabG		NCPPB2275_01148	5
NCPPB2275_00257	GO:0102132	F	3-oxoacyl-ACP reductase FabG		NCPPB2275_02780	5
NCPPB2275_00257	GO:0006633	P	3-oxoacyl-ACP reductase FabG		NCPPB2275_02946	5
NCPPB2275_00259	GO:0005737	C	ketoacyl-ACP synthase III		NCPPB2275_03734	5
NCPPB2275_00259	GO:0004315	F	ketoacyl-ACP synthase III		NCPPB2281_00089	5
NCPPB2275_00259	GO:0033818	F	ketoacyl-ACP synthase III		NCPPB2281_02837	5
NCPPB2275_00259	GO:0006633	P	ketoacyl-ACP synthase III		NCPPB2282_01320	5
NCPPB2275_00268	GO:0042597	C	flagellar assembly peptidoglycan hydrolase FlgJ		PANS_07_10_00627	5
NCPPB2275_00268	GO:0004040	F	flagellar assembly peptidoglycan hydrolase FlgJ		PANS_07_10_01888	5
NCPPB2275_00268	GO:0016798	F	flagellar assembly peptidoglycan hydrolase FlgJ		PANS_07_12_00117	5
NCPPB2275_00268	GO:0008152	P	flagellar assembly peptidoglycan hydrolase FlgJ		PANS_07_12_00378	5
NCPPB2275_00268	GO:0044780	P	flagellar assembly peptidoglycan hydrolase FlgJ		PANS_07_14_00518	5
NCPPB2275_00273	GO:0009425	C	flagellar hook protein FlgE		PANS_07_14_01291	5
NCPPB2275_00273	GO:0071973	P	flagellar hook protein FlgE		PANS_07_4_00133	5
NCPPB2275_00275	GO:0030694	C	flagellar basal body rod protein FlgC		PANS_07_4_00168	5
NCPPB2275_00275	GO:0071973	P	flagellar basal body rod protein FlgC		PANS_07_4_00178	5
NCPPB2275_00279	GO:0044780	P	flagellar biosynthesis protein FlgN		PANS_07_4_00886	5
NCPPB2275_00286	GO:0004151	F	dihydroorotase		PANS_07_4_01114	5
NCPPB2275_00286	GO:0008270	F	dihydroorotase		PANS_07_4_01126	5
NCPPB2275_00286	GO:0019856	P	dihydroorotase		PANS_07_4_01137	5
NCPPB2275_00286	GO:0044205	P	dihydroorotase		PANS_07_4_01506	5
NCPPB2275_00309	GO:0003700	F	AraC family transcriptional regulator		PANS_07_4_01580	5
NCPPB2275_00309	GO:0043565	F	AraC family transcriptional regulator		PANS_07_4_01845	5
NCPPB2275_00309	GO:0006355	P	AraC family transcriptional regulator		PANS_07_4_02141	5
NCPPB2275_00394	GO:0042597	C	outer membrane lipoprotein chaperone LolA		PANS_07_4_02152	5
NCPPB2275_00394	GO:0042953	P	outer membrane lipoprotein chaperone LolA		PANS_07_4_02213	5
NCPPB2275_00394	GO:0044874	P	outer membrane lipoprotein chaperone LolA		PANS_07_4_02318	5
NCPPB2275_00418	GO:0016021	C	DUF2593 family protein		PANS_07_4_02356	5
NCPPB2275_00429	GO:0016021	C	membrane protein		PANS_07_4_02386	5
NCPPB2275_00530	GO:0003849	F	3-deoxy-7-phosphoheptulonate synthase AroG		PANS_07_4_03068	5
NCPPB2275_00530	GO:0008652	P	3-deoxy-7-phosphoheptulonate synthase AroG		PANS_07_4_03079	5
NCPPB2275_00530	GO:0009073	P	3-deoxy-7-phosphoheptulonate synthase AroG		PANS_07_4_03235	5
NCPPB2275_00530	GO:0009423	P	3-deoxy-7-phosphoheptulonate synthase AroG		PANS_07_4_03243	5
NCPPB2275_00545	GO:0005887	C	Tol-Pal system protein TolQ		PANS_07_4_03260	5
NCPPB2275_00545	GO:0007049	P	Tol-Pal system protein TolQ		PANS_07_4_03399	5
NCPPB2275_00545	GO:0043213	P	Tol-Pal system protein TolQ		PANS_99_15_03254	5
NCPPB2275_00545	GO:0051301	P	Tol-Pal system protein TolQ		PANS_99_15_04017	5
NCPPB2275_00553	GO:0045252	C	2-oxoglutarate dehydrogenase complex dihydrolipoyllysine-residue succinyltransferase		PNA_03_3_00062	5
NCPPB2275_00553	GO:0004149	F	2-oxoglutarate dehydrogenase complex dihydrolipoyllysine-residue succinyltransferase		PNA_03_3_00115	5
NCPPB2275_00553	GO:0006099	P	2-oxoglutarate dehydrogenase complex dihydrolipoyllysine-residue succinyltransferase		PNA_03_3_00258	5
NCPPB2275_00553	GO:0033512	P	2-oxoglutarate dehydrogenase complex dihydrolipoyllysine-residue succinyltransferase		PNA_03_3_00288	5
NCPPB2275_00560	GO:0008080	F	GNAT family N-acetyltransferase		PNA_03_3_01618	5
NCPPB2275_00597	GO:0043190	C	glutamate/aspartate ABC transporter permease GltK		PNA_03_3_01629	5
NCPPB2275_00597	GO:0022857	F	glutamate/aspartate ABC transporter permease GltK		PNA_03_3_01874	5
NCPPB2275_00597	GO:0006865	P	glutamate/aspartate ABC transporter permease GltK		PNA_03_3_03370	5
NCPPB2275_00597	GO:0055085	P	glutamate/aspartate ABC transporter permease GltK		PNA_14_11_00089	5
NCPPB2275_00598	GO:0016020	C	amino acid ABC transporter ATP-binding protein		PNA_14_11_01866	5
NCPPB2275_00598	GO:0005524	F	amino acid ABC transporter ATP-binding protein		PNA_15_2_01945	5
NCPPB2275_00598	GO:0015424	F	amino acid ABC transporter ATP-binding protein		PNA_15_2_02013	5
NCPPB2275_00598	GO:0042626	F	amino acid ABC transporter ATP-binding protein		PNA_15_2_02119	5
NCPPB2275_00598	GO:0003333	P	amino acid ABC transporter ATP-binding protein		NCPPB2275_00028	4
NCPPB2275_00644	GO:0016021	C	hypothetical protein C7433_1011276		NCPPB2275_00030	4
NCPPB2275_00666	GO:0016021	C	hypothetical protein HA47_06970		NCPPB2275_00061	4
NCPPB2275_00884	GO:0016757	F	mannosyltransferase		NCPPB2275_00099	4
NCPPB2275_00988	GO:0005737	C	ribonuclease E inhibitor RraB		NCPPB2275_00256	4
NCPPB2275_00988	GO:0019899	F	ribonuclease E inhibitor RraB		NCPPB2275_00259	4
NCPPB2275_00988	GO:0060698	F	ribonuclease E inhibitor RraB		NCPPB2275_00286	4
NCPPB2275_00988	GO:0060702	P	ribonuclease E inhibitor RraB		NCPPB2275_00530	4
NCPPB2275_01019	GO:0005737	C	ribosome maturation factor RimP		NCPPB2275_00545	4
NCPPB2275_01019	GO:0042274	P	ribosome maturation factor RimP		NCPPB2275_00553	4
NCPPB2275_01020	GO:0005886	C	preprotein translocase subunit SecG		NCPPB2275_00597	4
NCPPB2275_01020	GO:0016021	C	preprotein translocase subunit SecG		NCPPB2275_00988	4
NCPPB2275_01020	GO:0015450	F	preprotein translocase subunit SecG		NCPPB2275_01042	4
NCPPB2275_01020	GO:0009306	P	preprotein translocase subunit SecG		NCPPB2275_01185	4
NCPPB2275_01020	GO:0071806	P	preprotein translocase subunit SecG		NCPPB2275_02733	4
NCPPB2275_01021	GO:0000287	F	phosphoglucosamine mutase		NCPPB2275_02929	4
NCPPB2275_01021	GO:0008966	F	phosphoglucosamine mutase		NCPPB2275_03043	4
NCPPB2275_01021	GO:0005975	P	phosphoglucosamine mutase		NCPPB2275_03794	4
NCPPB2275_01034	GO:0003677	F	BolA family iron metabolism protein IbaG		NCPPB2275_03806	4
NCPPB2275_01042	GO:0019143	F	3-deoxy-manno-octulosonate-8-phosphatase KdsC		NCPPB2281_00081	4
NCPPB2275_01042	GO:0046872	F	3-deoxy-manno-octulosonate-8-phosphatase KdsC		NCPPB2281_00151	4
NCPPB2275_01042	GO:0009103	P	3-deoxy-manno-octulosonate-8-phosphatase KdsC		NCPPB2281_00156	4
NCPPB2275_01042	GO:0016311	P	3-deoxy-manno-octulosonate-8-phosphatase KdsC		NCPPB2281_02734	4
NCPPB2275_01046	GO:0016987	F	RNA polymerase factor sigma-54		NCPPB2281_02761	4
NCPPB2275_01046	GO:0003677	F	RNA polymerase factor sigma-54		NCPPB2281_02776	4
NCPPB2275_01046	GO:0003899	F	RNA polymerase factor sigma-54		NCPPB2281_02789	4
NCPPB2275_01046	GO:2000142	P	RNA polymerase factor sigma-54		NCPPB2281_02918	4
NCPPB2275_01046	GO:0045893	P	RNA polymerase factor sigma-54		PANS_07_10_00939	4
NCPPB2275_01046	GO:0001216	F	RNA polymerase factor sigma-54		PANS_07_10_01091	4
NCPPB2275_01072	GO:0016021	C	FxsA family protein		PANS_07_10_01171	4
NCPPB2275_01101	GO:0005737	C	3-dehydro-L-gulonate 2-dehydrogenase		PANS_07_10_01381	4
NCPPB2275_01101	GO:0047559	F	3-dehydro-L-gulonate 2-dehydrogenase		PANS_07_10_01389	4
NCPPB2275_01101	GO:0070403	F	3-dehydro-L-gulonate 2-dehydrogenase		PANS_07_10_02672	4
NCPPB2275_01111	GO:0004497	F	NADPH-dependent L-lysine N(6)-monooxygenase		PANS_07_10_02788	4
NCPPB2275_01148	GO:0003677	F	response regulator		PANS_07_10_04327	4
NCPPB2275_01148	GO:0004190	F	response regulator		PANS_07_14_00439	4
NCPPB2275_01148	GO:0000160	P	response regulator		PANS_07_14_00798	4
NCPPB2275_01148	GO:0006355	P	response regulator		PANS_07_4_00002	4
NCPPB2275_01148	GO:0006508	P	response regulator		PANS_07_4_00123	4
NCPPB2275_01169	GO:0005886	C	CidA/LrgA family protein		PANS_07_4_00881	4
NCPPB2275_01169	GO:0016021	C	CidA/LrgA family protein		PANS_07_4_00883	4
NCPPB2275_01177	GO:0016740	F	teichuronopeptide biosynthesis TupA-like protein		PANS_07_4_00951	4
NCPPB2275_01185	GO:0003697	F	single-stranded DNA-binding protein SSB1		PANS_07_4_01125	4
NCPPB2275_01185	GO:0006260	P	single-stranded DNA-binding protein SSB1		PANS_07_4_01155	4
NCPPB2275_01185	GO:0006281	P	single-stranded DNA-binding protein SSB1		PANS_07_4_01434	4
NCPPB2275_01185	GO:0006310	P	single-stranded DNA-binding protein SSB1		PANS_07_4_01676	4
NCPPB2275_01198	GO:0003700	F	zinc uptake transcriptional repressor Zur		PANS_07_4_01866	4
NCPPB2275_01198	GO:0006355	P	zinc uptake transcriptional repressor Zur		PANS_07_4_01921	4
NCPPB2275_02649	GO:0016757	F	amylovoran biosynthesis protein AmsD		PANS_07_4_01945	4
NCPPB2275_02660	GO:0008830	F	dTDP-4-dehydrorhamnose 3,5-epimerase		PANS_07_4_02090	4
NCPPB2275_02660	GO:0019305	P	dTDP-4-dehydrorhamnose 3,5-epimerase		PANS_07_4_02193	4
NCPPB2275_02733	GO:0016021	C	GlxA family transcriptional regulator		PANS_07_4_02228	4
NCPPB2275_02733	GO:0003700	F	GlxA family transcriptional regulator		PANS_07_4_02232	4
NCPPB2275_02733	GO:0043565	F	GlxA family transcriptional regulator		PANS_07_4_02310	4
NCPPB2275_02733	GO:0006355	P	GlxA family transcriptional regulator		PANS_07_4_02380	4
NCPPB2275_02754	GO:0005886	C	ABC transporter permease		PANS_07_4_02385	4
NCPPB2275_02754	GO:0016021	C	ABC transporter permease		PANS_07_4_03073	4
NCPPB2275_02754	GO:0055085	P	ABC transporter permease		PANS_07_4_03080	4
NCPPB2275_02755	GO:0005524	F	ABC transporter ATP-binding protein		PANS_07_4_03203	4
NCPPB2275_02755	GO:0042626	F	ABC transporter ATP-binding protein		PANS_07_4_03229	4
NCPPB2275_02755	GO:0055085	P	ABC transporter ATP-binding protein		PANS_07_4_03230	4
NCPPB2275_02780	GO:0005886	C	sugar ABC transporter ATP-binding protein		PANS_07_4_03245	4
NCPPB2275_02780	GO:0005524	F	sugar ABC transporter ATP-binding protein		PANS_07_4_03257	4
NCPPB2275_02780	GO:0015611	F	sugar ABC transporter ATP-binding protein		PANS_07_4_03258	4
NCPPB2275_02780	GO:0043211	F	sugar ABC transporter ATP-binding protein		PANS_07_4_03259	4
NCPPB2275_02780	GO:0015752	P	sugar ABC transporter ATP-binding protein		PANS_07_4_03480	4
NCPPB2275_02783	GO:0016787	F	D-lyxose/D-mannose family sugar isomerase		PANS_07_4_03491	4
NCPPB2275_02783	GO:0016853	F	D-lyxose/D-mannose family sugar isomerase		PANS_99_15_00737	4
NCPPB2275_02807	GO:0004722	F	serine/threonine-protein phosphatase		PANS_99_15_00796	4
NCPPB2275_02807	GO:0006470	P	serine/threonine-protein phosphatase		PANS_99_15_00955	4
NCPPB2275_02905	GO:0004497	F	antibiotic biosynthesis monooxygenase		PNA_03_3_00067	4
NCPPB2275_02908	GO:0005886	C	cytochrome ubiquinol oxidase subunit I		PNA_03_3_00095	4
NCPPB2275_02908	GO:0016021	C	cytochrome ubiquinol oxidase subunit I		PNA_03_3_00130	4
NCPPB2275_02908	GO:0070069	C	cytochrome ubiquinol oxidase subunit I		PNA_03_3_00134	4
NCPPB2275_02908	GO:0009055	F	cytochrome ubiquinol oxidase subunit I		PNA_03_3_00287	4
NCPPB2275_02908	GO:0046872	F	cytochrome ubiquinol oxidase subunit I		PNA_03_3_01542	4
NCPPB2275_02908	GO:0019646	P	cytochrome ubiquinol oxidase subunit I		PNA_03_3_01655	4
NCPPB2275_02909	GO:0005886	C	cytochrome d ubiquinol oxidase subunit II		PNA_03_3_01680	4
NCPPB2275_02909	GO:0016021	C	cytochrome d ubiquinol oxidase subunit II		PNA_03_3_01772	4
NCPPB2275_02909	GO:0016491	F	cytochrome d ubiquinol oxidase subunit II		PNA_03_3_01797	4
NCPPB2275_02920	GO:0005506	F	oxidative damage protection protein		PNA_03_3_01853	4
NCPPB2275_02929	GO:0008982	F	PTS mannitol transporter subunit IIB		PNA_03_3_03371	4
NCPPB2275_02929	GO:0103111	F	PTS mannitol transporter subunit IIB		PNA_03_3_03372	4
NCPPB2275_02929	GO:0009401	P	PTS mannitol transporter subunit IIB		PNA_03_3_03385	4
NCPPB2275_02929	GO:0034219	P	PTS mannitol transporter subunit IIB		PNA_03_3_03400	4
NCPPB2275_02935	GO:0030170	F	YggS family pyridoxal phosphate-dependent enzyme		PNA_03_3_03401	4
NCPPB2275_02946	GO:0008792	F	biosynthetic arginine decarboxylase		PNA_15_2_01642	4
NCPPB2275_02946	GO:0046872	F	biosynthetic arginine decarboxylase		LMG2632_03032	3
NCPPB2275_02946	GO:0006527	P	biosynthetic arginine decarboxylase		NCPPB1562_02736	3
NCPPB2275_02946	GO:0008295	P	biosynthetic arginine decarboxylase		NCPPB2275_00035	3
NCPPB2275_02946	GO:0009446	P	biosynthetic arginine decarboxylase		NCPPB2275_00091	3
NCPPB2275_02948	GO:0004222	F	M48 family metallopeptidase		NCPPB2275_00096	3
NCPPB2275_02948	GO:0046872	F	M48 family metallopeptidase		NCPPB2275_00309	3
NCPPB2275_02948	GO:0006508	P	M48 family metallopeptidase		NCPPB2275_00394	3
NCPPB2275_02967	GO:0005960	C	glycine cleavage system protein GcvH		NCPPB2275_01021	3
NCPPB2275_02967	GO:0019464	P	glycine cleavage system protein GcvH		NCPPB2275_01101	3
NCPPB2275_02977	GO:0042597	C	bifunctional protein-disulfide isomerase/oxidoreductase DsbC		NCPPB2275_02754	3
NCPPB2275_02977	GO:0016853	F	bifunctional protein-disulfide isomerase/oxidoreductase DsbC		NCPPB2275_02755	3
NCPPB2275_02979	GO:0005737	C	Peptide chain release factor 2		NCPPB2275_02909	3
NCPPB2275_02979	GO:0016149	F	Peptide chain release factor 2		NCPPB2275_02948	3
NCPPB2275_02979	GO:0006415	P	Peptide chain release factor 2		NCPPB2275_02979	3
NCPPB2275_03036	GO:0046872	F	6-carboxytetrahydropterin synthase QueD		NCPPB2275_03036	3
NCPPB2275_03036	GO:0070497	F	6-carboxytetrahydropterin synthase QueD		NCPPB2275_03796	3
NCPPB2275_03036	GO:0008616	P	6-carboxytetrahydropterin synthase QueD		NCPPB2275_03797	3
NCPPB2275_03043	GO:0043190	C	amino acid ABC transporter permease		NCPPB2281_00117	3
NCPPB2275_03043	GO:0022857	F	amino acid ABC transporter permease		NCPPB2281_00120	3
NCPPB2275_03043	GO:0006865	P	amino acid ABC transporter permease		NCPPB2281_00136	3
NCPPB2275_03043	GO:0055085	P	amino acid ABC transporter permease		NCPPB2281_00145	3
NCPPB2275_03050	GO:0004851	F	uroporphyrinogen-III C-methyltransferase		NCPPB2281_02359	3
NCPPB2275_03050	GO:0043115	F	uroporphyrinogen-III C-methyltransferase		NCPPB2281_02804	3
NCPPB2275_03050	GO:0051266	F	uroporphyrinogen-III C-methyltransferase		NCPPB2281_02817	3
NCPPB2275_03050	GO:0051287	F	uroporphyrinogen-III C-methyltransferase		NCPPB2282_02189	3
NCPPB2275_03050	GO:0009236	P	uroporphyrinogen-III C-methyltransferase		PANS_07_10_00802	3
NCPPB2275_03050	GO:0019354	P	uroporphyrinogen-III C-methyltransferase		PANS_07_10_00842	3
NCPPB2275_03050	GO:0032259	P	uroporphyrinogen-III C-methyltransferase		PANS_07_10_01136	3
NCPPB2275_03059	GO:0005737	C	5'/3'-nucleotidase SurE		PANS_07_10_02150	3
NCPPB2275_03059	GO:0000166	F	5'/3'-nucleotidase SurE		PANS_07_10_02669	3
NCPPB2275_03059	GO:0004309	F	5'/3'-nucleotidase SurE		PANS_07_10_02670	3
NCPPB2275_03059	GO:0008253	F	5'/3'-nucleotidase SurE		PANS_07_10_02894	3
NCPPB2275_03059	GO:0008254	F	5'/3'-nucleotidase SurE		PANS_07_14_00490	3
NCPPB2275_03059	GO:0046872	F	5'/3'-nucleotidase SurE		PANS_07_14_01798	3
NCPPB2275_03059	GO:0016311	P	5'/3'-nucleotidase SurE		PANS_07_14_02447	3
NCPPB2275_03069	GO:0019159	F	nicotinamide-nucleotide amidase		PANS_07_4_00019	3
NCPPB2275_03086	GO:0016021	C	MULTISPECIES: hypothetical protein		PANS_07_4_00065	3
NCPPB2275_03731	GO:0004731	F	purine-nucleoside phosphorylase		PANS_07_4_00081	3
NCPPB2275_03731	GO:0042278	P	purine-nucleoside phosphorylase		PANS_07_4_00143	3
NCPPB2275_03734	GO:0005737	C	deoxyribose-phosphate aldolase		PANS_07_4_00144	3
NCPPB2275_03734	GO:0004139	F	deoxyribose-phosphate aldolase		PANS_07_4_00888	3
NCPPB2275_03734	GO:0009264	P	deoxyribose-phosphate aldolase		PANS_07_4_00943	3
NCPPB2275_03734	GO:0016052	P	deoxyribose-phosphate aldolase		PANS_07_4_01178	3
NCPPB2275_03734	GO:0046386	P	deoxyribose-phosphate aldolase		PANS_07_4_01543	3
NCPPB2275_03794	GO:0022877	F	PTS fructose transporter subunit IIB		PANS_07_4_01612	3
NCPPB2275_03794	GO:0103111	F	PTS fructose transporter subunit IIB		PANS_07_4_01828	3
NCPPB2275_03794	GO:0009401	P	PTS fructose transporter subunit IIB		PANS_07_4_01899	3
NCPPB2275_03794	GO:0015755	P	PTS fructose transporter subunit IIB		PANS_07_4_01947	3
NCPPB2275_03795	GO:0005886	C	PTS fructose transporter subunit IIC		PANS_07_4_01958	3
NCPPB2275_03795	GO:0016021	C	PTS fructose transporter subunit IIC		PANS_07_4_01992	3
NCPPB2275_03795	GO:0005351	F	PTS fructose transporter subunit IIC		PANS_07_4_02087	3
NCPPB2275_03795	GO:0008982	F	PTS fructose transporter subunit IIC		PANS_07_4_02106	3
NCPPB2275_03795	GO:0103111	F	PTS fructose transporter subunit IIC		PANS_07_4_02129	3
NCPPB2275_03795	GO:0009401	P	PTS fructose transporter subunit IIC		PANS_07_4_02161	3
NCPPB2275_03795	GO:0034219	P	PTS fructose transporter subunit IIC		PANS_07_4_02197	3
NCPPB2275_03795	GO:1902600	P	PTS fructose transporter subunit IIC		PANS_07_4_02290	3
NCPPB2275_03796	GO:0008270	F	class II fructose-bisphosphate aldolase family protein		PANS_07_4_02291	3
NCPPB2275_03796	GO:0016832	F	class II fructose-bisphosphate aldolase family protein		PANS_07_4_02346	3
NCPPB2275_03796	GO:0005975	P	class II fructose-bisphosphate aldolase family protein		PANS_07_4_02348	3
NCPPB2275_03797	GO:0008270	F	ketose-bisphosphate aldolase		PANS_07_4_02349	3
NCPPB2275_03797	GO:0009025	F	ketose-bisphosphate aldolase		PANS_07_4_02364	3
NCPPB2275_03797	GO:0005975	P	ketose-bisphosphate aldolase		PANS_07_4_02365	3
NCPPB2275_03801	GO:0005694	C	DNA topoisomerase IV subunit B		PANS_07_4_02374	3
NCPPB2275_03801	GO:0003677	F	DNA topoisomerase IV subunit B		PANS_07_4_02414	3
NCPPB2275_03801	GO:0003918	F	DNA topoisomerase IV subunit B		PANS_07_4_03029	3
NCPPB2275_03801	GO:0005524	F	DNA topoisomerase IV subunit B		PANS_07_4_03061	3
NCPPB2275_03801	GO:0006265	P	DNA topoisomerase IV subunit B		PANS_07_4_03072	3
NCPPB2275_03801	GO:0007059	P	DNA topoisomerase IV subunit B		PANS_07_4_03216	3
NCPPB2275_03802	GO:0016787	F	esterase YqiA		PANS_07_4_03236	3
NCPPB2275_03806	GO:0016021	C	outer membrane channel protein TolC		PANS_07_4_03254	3
NCPPB2275_03806	GO:0019867	C	outer membrane channel protein TolC		PANS_07_4_03273	3
NCPPB2275_03806	GO:0015562	F	outer membrane channel protein TolC		PANS_07_4_03282	3
NCPPB2275_03806	GO:0055085	P	outer membrane channel protein TolC		PANS_07_4_03286	3
NCPPB2275_03815	GO:0016021	C	SH3 domain-containing protein		PANS_07_4_03408	3
NCPPB2281_00023	GO:0016301	F	kinase inhibitor		PANS_07_6_03403	3
NCPPB2281_00023	GO:0016310	P	kinase inhibitor		PANS_99_15_03275	3
NCPPB2281_00043	GO:0016021	C	YbhQ family protein		PNA_03_3_00024	3
NCPPB2281_00081	GO:0005737	C	23S rRNA (adenine(1618)-N(6))-methyltransferase RlmF		PNA_03_3_00055	3
NCPPB2281_00081	GO:0003676	F	23S rRNA (adenine(1618)-N(6))-methyltransferase RlmF		PNA_03_3_00066	3
NCPPB2281_00081	GO:0052907	F	23S rRNA (adenine(1618)-N(6))-methyltransferase RlmF		PNA_03_3_00099	3
NCPPB2281_00081	GO:0031167	P	23S rRNA (adenine(1618)-N(6))-methyltransferase RlmF		PNA_03_3_00112	3
NCPPB2281_00089	GO:0003677	F	manganese-binding transcriptional regulator MntR		PNA_03_3_00192	3
NCPPB2281_00089	GO:0003700	F	manganese-binding transcriptional regulator MntR		PNA_03_3_00250	3
NCPPB2281_00089	GO:0046914	F	manganese-binding transcriptional regulator MntR		PNA_03_3_00266	3
NCPPB2281_00089	GO:0046983	F	manganese-binding transcriptional regulator MntR		PNA_03_3_00267	3
NCPPB2281_00089	GO:0006355	P	manganese-binding transcriptional regulator MntR		PNA_03_3_00276	3
NCPPB2281_00091	GO:0016021	C	HlyD family secretion protein		PNA_03_3_01463	3
NCPPB2281_00091	GO:0055085	P	HlyD family secretion protein		PNA_03_3_01525	3
NCPPB2281_00117	GO:0042597	C	spermidine/putrescine ABC transporter substrate-binding protein PotF		PNA_03_3_01609	3
NCPPB2281_00117	GO:0019808	F	spermidine/putrescine ABC transporter substrate-binding protein PotF		PNA_03_3_01641	3
NCPPB2281_00117	GO:0015846	P	spermidine/putrescine ABC transporter substrate-binding protein PotF		PNA_03_3_01664	3
NCPPB2281_00120	GO:0005886	C	putrescine ABC transporter permease PotI		PNA_03_3_01683	3
NCPPB2281_00120	GO:0016021	C	putrescine ABC transporter permease PotI		PNA_03_3_01726	3
NCPPB2281_00120	GO:0055085	P	putrescine ABC transporter permease PotI		PNA_03_3_01759	3
NCPPB2281_00136	GO:0008233	F	ATP-dependent Clp protease adapter ClpS		PNA_03_3_01770	3
NCPPB2281_00136	GO:0006508	P	ATP-dependent Clp protease adapter ClpS		PNA_03_3_01819	3
NCPPB2281_00136	GO:0030163	P	ATP-dependent Clp protease adapter ClpS		PNA_03_3_01895	3
NCPPB2281_00145	GO:0042597	C	outer membrane lipoprotein chaperone LolA		PNA_03_3_03348	3
NCPPB2281_00145	GO:0042953	P	outer membrane lipoprotein chaperone LolA		PNA_03_3_03357	3
NCPPB2281_00145	GO:0044874	P	outer membrane lipoprotein chaperone LolA		PNA_03_3_03376	3
NCPPB2281_00151	GO:0016021	C	formate transporter FocA		PNA_14_11_00061	3
NCPPB2281_00151	GO:0015499	F	formate transporter FocA		PNA_14_11_00062	3
NCPPB2281_00151	GO:0015724	P	formate transporter FocA		PNA_14_11_03132	3
NCPPB2281_00151	GO:0055085	P	formate transporter FocA		PNA_14_11_03291	3
NCPPB2281_00156	GO:0005840	C	30S ribosomal protein S1		PNA_15_2_02192	3
NCPPB2281_00156	GO:0003723	F	30S ribosomal protein S1		PNA_15_2_02455	3
NCPPB2281_00156	GO:0003735	F	30S ribosomal protein S1		PNA_15_2_02540	3
NCPPB2281_00156	GO:0006412	P	30S ribosomal protein S1		LMG2632_01479	2
NCPPB2281_00190	GO:0016021	C	paraquat-inducible protein B		NCPPB2275_00042	2
NCPPB2281_00192	GO:0005737	C	bifunctional 3-hydroxydecanoyl-ACP dehydratase/trans-2-decenoyl-ACP isomerase		NCPPB2275_00197	2
NCPPB2281_00192	GO:0004317	F	bifunctional 3-hydroxydecanoyl-ACP dehydratase/trans-2-decenoyl-ACP isomerase		NCPPB2275_00273	2
NCPPB2281_00192	GO:0008659	F	bifunctional 3-hydroxydecanoyl-ACP dehydratase/trans-2-decenoyl-ACP isomerase		NCPPB2275_00275	2
NCPPB2281_00192	GO:0008693	F	bifunctional 3-hydroxydecanoyl-ACP dehydratase/trans-2-decenoyl-ACP isomerase		NCPPB2275_01019	2
NCPPB2281_00192	GO:0034017	F	bifunctional 3-hydroxydecanoyl-ACP dehydratase/trans-2-decenoyl-ACP isomerase		NCPPB2275_01169	2
NCPPB2281_00192	GO:0047451	F	bifunctional 3-hydroxydecanoyl-ACP dehydratase/trans-2-decenoyl-ACP isomerase		NCPPB2275_01198	2
NCPPB2281_00192	GO:0006633	P	bifunctional 3-hydroxydecanoyl-ACP dehydratase/trans-2-decenoyl-ACP isomerase		NCPPB2275_02660	2
NCPPB2281_02359	GO:0004846	F	OHCU decarboxylase		NCPPB2275_02783	2
NCPPB2281_02359	GO:0016829	F	OHCU decarboxylase		NCPPB2275_02807	2
NCPPB2281_02359	GO:0006144	P	OHCU decarboxylase		NCPPB2275_02967	2
NCPPB2281_02441	GO:0003824	F	TIGR01777 family protein		NCPPB2275_02977	2
NCPPB2281_02725	GO:0008777	F	M20 family metallopeptidase		NCPPB2275_03731	2
NCPPB2281_02727	GO:0043190	C	LPS export ABC transporter permease LptG		NCPPB2281_00023	2
NCPPB2281_02727	GO:0055085	P	LPS export ABC transporter permease LptG		NCPPB2281_00091	2
NCPPB2281_02728	GO:0043190	C	LPS export ABC transporter permease LptF		NCPPB2281_02727	2
NCPPB2281_02728	GO:0055085	P	LPS export ABC transporter permease LptF		NCPPB2281_02728	2
NCPPB2281_02734	GO:0005737	C	ribonuclease E inhibitor RraB		PANS_07_10_00043	2
NCPPB2281_02734	GO:0019899	F	ribonuclease E inhibitor RraB		PANS_07_10_00645	2
NCPPB2281_02734	GO:0060698	F	ribonuclease E inhibitor RraB		PANS_07_10_00724	2
NCPPB2281_02734	GO:0060702	P	ribonuclease E inhibitor RraB		PANS_07_10_01190	2
NCPPB2281_02761	GO:0003723	F	tRNA pseudouridine(55) synthase TruB		PANS_07_10_01840	2
NCPPB2281_02761	GO:0016829	F	tRNA pseudouridine(55) synthase TruB		PANS_07_10_01859	2
NCPPB2281_02761	GO:0106029	F	tRNA pseudouridine(55) synthase TruB		PANS_07_10_02735	2
NCPPB2281_02761	GO:0031119	P	tRNA pseudouridine(55) synthase TruB		PANS_07_14_00595	2
NCPPB2281_02776	GO:0005840	C	50S ribosomal protein L21		PANS_07_14_01387	2
NCPPB2281_02776	GO:0003735	F	50S ribosomal protein L21		PANS_07_14_02385	2
NCPPB2281_02776	GO:0019843	F	50S ribosomal protein L21		PANS_07_14_02474	2
NCPPB2281_02776	GO:0006412	P	50S ribosomal protein L21		PANS_07_4_00034	2
NCPPB2281_02778	GO:0003677	F	helix-turn-helix domain-containing protein		PANS_07_4_00050	2
NCPPB2281_02789	GO:0005887	C	LPS export ABC transporter periplasmic protein LptC		PANS_07_4_00171	2
NCPPB2281_02789	GO:0015221	F	LPS export ABC transporter periplasmic protein LptC		PANS_07_4_01067	2
NCPPB2281_02789	GO:0015920	P	LPS export ABC transporter periplasmic protein LptC		PANS_07_4_01119	2
NCPPB2281_02789	GO:0043165	P	LPS export ABC transporter periplasmic protein LptC		PANS_07_4_01142	2
NCPPB2281_02793	GO:0006417	P	ribosome hibernation promoting factor		PANS_07_4_01144	2
NCPPB2281_02796	GO:0016740	F	PTS phosphocarrier protein NPr		PANS_07_4_01600	2
NCPPB2281_02804	GO:0005840	C	50S ribosomal protein L13		PANS_07_4_01610	2
NCPPB2281_02804	GO:0003735	F	50S ribosomal protein L13		PANS_07_4_02118	2
NCPPB2281_02804	GO:0006412	P	50S ribosomal protein L13		PANS_07_4_02252	2
NCPPB2281_02817	GO:0005737	C	co-chaperone GroES		PANS_07_4_02263	2
NCPPB2281_02817	GO:0005524	F	co-chaperone GroES		PANS_07_4_02264	2
NCPPB2281_02817	GO:0006457	P	co-chaperone GroES		PANS_07_4_02265	2
NCPPB2281_02818	GO:0016021	C	FxsA family protein		PANS_07_4_02297	2
NCPPB2281_02837	GO:0009279	C	carbohydrate porin		PANS_07_4_02320	2
NCPPB2281_02837	GO:0046930	C	carbohydrate porin		PANS_07_4_02359	2
NCPPB2281_02837	GO:0015288	F	carbohydrate porin		PANS_07_4_02439	2
NCPPB2281_02837	GO:0008643	P	carbohydrate porin		PANS_07_4_02448	2
NCPPB2281_02837	GO:0055085	P	carbohydrate porin		PANS_07_4_03034	2
NCPPB2281_02918	GO:0003677	F	redox-sensitive transcriptional activator SoxR		PANS_07_4_03195	2
NCPPB2281_02918	GO:0051537	F	redox-sensitive transcriptional activator SoxR		PANS_07_4_03196	2
NCPPB2281_02918	GO:0006355	P	redox-sensitive transcriptional activator SoxR		PANS_07_4_03231	2
NCPPB2281_02918	GO:0006979	P	redox-sensitive transcriptional activator SoxR		PANS_07_4_03234	2
NCPPB2281_02937	GO:1990077	C	replicative DNA helicase		PANS_07_4_03255	2
NCPPB2281_02937	GO:0003677	F	replicative DNA helicase		PANS_07_4_03475	2
NCPPB2281_02937	GO:0003678	F	replicative DNA helicase		PANS_07_6_00474	2
NCPPB2281_02937	GO:0005524	F	replicative DNA helicase		PANS_99_15_00021	2
NCPPB2281_02937	GO:0006269	P	replicative DNA helicase		PANS_99_15_00638	2
NCPPB2281_02937	GO:0032508	P	replicative DNA helicase		PANS_99_15_01370	2
NCPPB2281_02946	GO:0005886	C	diacylglycerol kinase		PANS_99_15_01514	2
NCPPB2281_02946	GO:0016021	C	diacylglycerol kinase		PANS_99_15_01595	2
NCPPB2281_02946	GO:0004143	F	diacylglycerol kinase		PANS_99_15_04022	2
NCPPB2281_02946	GO:0005524	F	diacylglycerol kinase		PANS_99_15_04030	2
NCPPB2281_02946	GO:0046872	F	diacylglycerol kinase		PNA_03_3_00029	2
NCPPB2281_02946	GO:0006654	P	diacylglycerol kinase		PNA_03_3_00165	2
NCPPB2281_02946	GO:0016310	P	diacylglycerol kinase		PNA_03_3_00166	2
NCPPB2282_02189	GO:0003677	F	FadR family transcriptional regulator		PNA_03_3_00167	2
NCPPB2282_02189	GO:0003700	F	FadR family transcriptional regulator		PNA_03_3_00261	2
NCPPB2282_02189	GO:0006355	P	FadR family transcriptional regulator		PNA_03_3_00351	2
PANS_07_10_00723	GO:0005737	C	RNA polymerase sigma factor FliA		PNA_03_3_01147	2
PANS_07_10_00723	GO:0003677	F	RNA polymerase sigma factor FliA		PNA_03_3_01510	2
PANS_07_10_00723	GO:0003899	F	RNA polymerase sigma factor FliA		PNA_03_3_01652	2
PANS_07_10_00723	GO:0016987	F	RNA polymerase sigma factor FliA		PNA_03_3_03113	2
PANS_07_10_00723	GO:0001123	P	RNA polymerase sigma factor FliA		PNA_03_3_03125	2
PANS_07_10_00723	GO:2000142	P	RNA polymerase sigma factor FliA		PNA_03_3_03375	2
PANS_07_10_00732	GO:0005886	C	sodium/proline symporter PutP		PNA_03_3_03396	2
PANS_07_10_00732	GO:0016021	C	sodium/proline symporter PutP		PNA_03_3_03399	2
PANS_07_10_00732	GO:0005298	F	sodium/proline symporter PutP		PNA_14_11_00165	2
PANS_07_10_00732	GO:0031402	F	sodium/proline symporter PutP		PNA_15_2_02512	2
PANS_07_10_00732	GO:0006814	P	sodium/proline symporter PutP		PNA_15_2_02602	2
PANS_07_10_00732	GO:0015824	P	sodium/proline symporter PutP		NCPPB1562_03640	1
PANS_07_10_00732	GO:1903825	P	sodium/proline symporter PutP		NCPPB2275_00026	1
PANS_07_10_01091	GO:0016021	C	MCP four helix bundle domain-containing protein		NCPPB2275_00043	1
PANS_07_10_01091	GO:0004888	F	MCP four helix bundle domain-containing protein		NCPPB2275_00075	1
PANS_07_10_01091	GO:0006935	P	MCP four helix bundle domain-containing protein		NCPPB2275_00095	1
PANS_07_10_01091	GO:0007165	P	MCP four helix bundle domain-containing protein		NCPPB2275_00247	1
PANS_07_10_01190	GO:0016787	F	hexitol phosphatase HxpB		NCPPB2275_00279	1
PANS_07_10_01190	GO:0046872	F	hexitol phosphatase HxpB		NCPPB2275_00418	1
PANS_07_10_01859	GO:0005886	C	polysaccharide biosynthesis protein		NCPPB2275_00429	1
PANS_07_10_01859	GO:0016021	C	polysaccharide biosynthesis protein		NCPPB2275_00560	1
PANS_07_12_00378	GO:0005737	C	5'-deoxynucleotidase		NCPPB2275_00644	1
PANS_07_12_00378	GO:0000166	F	5'-deoxynucleotidase		NCPPB2275_00666	1
PANS_07_12_00378	GO:0002953	F	5'-deoxynucleotidase		NCPPB2275_00884	1
PANS_07_12_00378	GO:0046872	F	5'-deoxynucleotidase		NCPPB2275_01034	1
PANS_07_12_00378	GO:0016311	P	5'-deoxynucleotidase		NCPPB2275_01072	1
PANS_07_12_00720	GO:0004145	F	spermidine N1-acetyltransferase		NCPPB2275_01111	1
PANS_07_12_01058	GO:0005886	C	cytochrome ubiquinol oxidase subunit I		NCPPB2275_01177	1
PANS_07_12_01058	GO:0016021	C	cytochrome ubiquinol oxidase subunit I		NCPPB2275_02649	1
PANS_07_12_01058	GO:0070069	C	cytochrome ubiquinol oxidase subunit I		NCPPB2275_02905	1
PANS_07_12_01058	GO:0009055	F	cytochrome ubiquinol oxidase subunit I		NCPPB2275_02920	1
PANS_07_12_01058	GO:0046872	F	cytochrome ubiquinol oxidase subunit I		NCPPB2275_02935	1
PANS_07_12_01058	GO:0019646	P	cytochrome ubiquinol oxidase subunit I		NCPPB2275_03069	1
PANS_07_12_01070	GO:0016787	F	epoxide hydrolase		NCPPB2275_03086	1
PANS_07_12_01089	GO:0016021	C	diguanylate cyclase		NCPPB2275_03802	1
PANS_07_14_00490	GO:0043190	C	ABC transporter substrate-binding protein		NCPPB2275_03815	1
PANS_07_14_00490	GO:0022857	F	ABC transporter substrate-binding protein		NCPPB2281_00043	1
PANS_07_14_00490	GO:0055085	P	ABC transporter substrate-binding protein		NCPPB2281_00190	1
PANS_07_14_00518	GO:0003677	F	manganese-binding transcriptional regulator MntR		NCPPB2281_02441	1
PANS_07_14_00518	GO:0003700	F	manganese-binding transcriptional regulator MntR		NCPPB2281_02725	1
PANS_07_14_00518	GO:0046914	F	manganese-binding transcriptional regulator MntR		NCPPB2281_02778	1
PANS_07_14_00518	GO:0046983	F	manganese-binding transcriptional regulator MntR		NCPPB2281_02793	1
PANS_07_14_00518	GO:0006355	P	manganese-binding transcriptional regulator MntR		NCPPB2281_02796	1
PANS_07_14_00595	GO:0097697	F	tRNA uridine 5-oxyacetic acid(34) methyltransferase CmoM		NCPPB2281_02818	1
PANS_07_14_00595	GO:0030488	P	tRNA uridine 5-oxyacetic acid(34) methyltransferase CmoM		PANS_07_10_00777	1
PANS_07_14_00850	GO:0016491	F	SDR family oxidoreductase		PANS_07_10_00919	1
PANS_07_14_01291	GO:0005737	C	flagellar assembly protein FliH		PANS_07_10_01137	1
PANS_07_14_01291	GO:0009288	C	flagellar assembly protein FliH		PANS_07_10_01245	1
PANS_07_14_01291	GO:0003774	F	flagellar assembly protein FliH		PANS_07_10_02117	1
PANS_07_14_01291	GO:0044781	P	flagellar assembly protein FliH		PANS_07_12_00720	1
PANS_07_14_01291	GO:0071973	P	flagellar assembly protein FliH		PANS_07_12_01070	1
PANS_07_14_01387	GO:0005886	C	YitT family protein		PANS_07_12_01089	1
PANS_07_14_01387	GO:0016021	C	YitT family protein		PANS_07_12_01137	1
PANS_07_14_01697	GO:0008080	F	GNAT family N-acetyltransferase		PANS_07_14_00540	1
PANS_07_14_01798	GO:0008270	F	5-dehydro-4-deoxy-D-glucuronate isomerase		PANS_07_14_00850	1
PANS_07_14_01798	GO:0008697	F	5-dehydro-4-deoxy-D-glucuronate isomerase		PANS_07_14_01697	1
PANS_07_14_01798	GO:0045490	P	5-dehydro-4-deoxy-D-glucuronate isomerase		PANS_07_14_02475	1
PANS_07_14_02474	GO:0016020	C	PAS domain-containing methyl-accepting chemotaxis protein		PANS_07_4_00036	1
PANS_07_14_02474	GO:0007165	P	PAS domain-containing methyl-accepting chemotaxis protein		PANS_07_4_00039	1
PANS_07_4_00133	GO:0005886	C	sugar ABC transporter ATP-binding protein		PANS_07_4_00059	1
PANS_07_4_00133	GO:0005524	F	sugar ABC transporter ATP-binding protein		PANS_07_4_00150	1
PANS_07_4_00133	GO:0015611	F	sugar ABC transporter ATP-binding protein		PANS_07_4_00841	1
PANS_07_4_00133	GO:0043211	F	sugar ABC transporter ATP-binding protein		PANS_07_4_00879	1
PANS_07_4_00133	GO:0015752	P	sugar ABC transporter ATP-binding protein		PANS_07_4_00895	1
PANS_07_4_00178	GO:0016021	C	EmmdR/YeeO family multidrug/toxin efflux MATE transporter		PANS_07_4_00927	1
PANS_07_4_00178	GO:0015297	F	EmmdR/YeeO family multidrug/toxin efflux MATE transporter		PANS_07_4_00947	1
PANS_07_4_00178	GO:0042910	F	EmmdR/YeeO family multidrug/toxin efflux MATE transporter		PANS_07_4_01116	1
PANS_07_4_00178	GO:0042908	P	EmmdR/YeeO family multidrug/toxin efflux MATE transporter		PANS_07_4_01425	1
PANS_07_4_00178	GO:0055085	P	EmmdR/YeeO family multidrug/toxin efflux MATE transporter		PANS_07_4_01438	1
PANS_07_4_00841	GO:0016021	C	DUF1656 domain-containing protein		PANS_07_4_01539	1
PANS_07_4_00947	GO:0016021	C	stress-induced protein YchH		PANS_07_4_01554	1
PANS_07_4_02228	GO:0009279	C	peptidoglycan-associated lipoprotein Pal		PANS_07_4_01569	1
PANS_07_4_02228	GO:0016021	C	peptidoglycan-associated lipoprotein Pal		PANS_07_4_01720	1
PANS_07_4_02228	GO:0007049	P	peptidoglycan-associated lipoprotein Pal		PANS_07_4_01753	1
PANS_07_4_02228	GO:0051301	P	peptidoglycan-associated lipoprotein Pal		PANS_07_4_01900	1
PANS_07_4_02414	GO:0005737	C	cell division protein ZapC		PANS_07_4_02084	1
PANS_07_4_02414	GO:0000917	P	cell division protein ZapC		PANS_07_4_02222	1
PANS_07_4_02414	GO:0043093	P	cell division protein ZapC		PANS_07_4_02223	1
PANS_07_4_02439	GO:0004030	F	succinate-semialdehyde dehydrogenase		PANS_07_4_02272	1
PANS_07_4_02439	GO:0004777	F	succinate-semialdehyde dehydrogenase		PANS_07_4_02281	1
PANS_07_4_03216	GO:0043365	F	anaerobic ribonucleoside-triphosphate reductase-activating protein		PANS_07_4_02372	1
PANS_07_4_03216	GO:0046872	F	anaerobic ribonucleoside-triphosphate reductase-activating protein		PANS_07_4_02419	1
PANS_07_4_03216	GO:0051539	F	anaerobic ribonucleoside-triphosphate reductase-activating protein		PANS_07_4_03011	1
PANS_07_6_00275	GO:0016757	F	glycosyl transferase		PANS_07_4_03032	1
PANS_99_15_00021	GO:0003677	F	flagella biosynthesis regulatory protein FliZ		PANS_07_4_03092	1
PANS_99_15_00021	GO:0015074	P	flagella biosynthesis regulatory protein FliZ		PANS_07_4_03193	1
PANS_99_15_00796	GO:0005524	F	ABC transporter ATP-binding protein		PANS_07_4_03222	1
PANS_99_15_00796	GO:0042626	F	ABC transporter ATP-binding protein		PANS_07_4_03247	1
PANS_99_15_00796	GO:0015833	P	ABC transporter ATP-binding protein		PANS_07_4_03262	1
PANS_99_15_00796	GO:0055085	P	ABC transporter ATP-binding protein		PANS_07_4_03265	1
PANS_99_15_00955	GO:0016021	C	chemotaxis protein		PANS_07_4_03271	1
PANS_99_15_00955	GO:0004888	F	chemotaxis protein		PANS_07_4_03287	1
PANS_99_15_00955	GO:0006935	P	chemotaxis protein		PANS_07_4_03418	1
PANS_99_15_00955	GO:0007165	P	chemotaxis protein		PANS_07_4_03483	1
PANS_99_15_01370	GO:0005840	C	GNAT family N-acetyltransferase		PANS_07_6_00275	1
PANS_99_15_01370	GO:0008080	F	GNAT family N-acetyltransferase		PANS_99_15_00739	1
PANS_99_15_01595	GO:0016888	F	metal-dependent hydrolase		PANS_99_15_00758	1
PANS_99_15_01595	GO:0006259	P	metal-dependent hydrolase		PANS_99_15_03212	1
PANS_99_15_03254	GO:0005737	C	Obg family GTPase CgtA		PANS_99_15_03218	1
PANS_99_15_03254	GO:0000287	F	Obg family GTPase CgtA		PANS_99_15_03276	1
PANS_99_15_03254	GO:0003924	F	Obg family GTPase CgtA		PANS_99_15_04153	1
PANS_99_15_03254	GO:0005525	F	Obg family GTPase CgtA		PNA_03_3_00111	1
PANS_99_15_03254	GO:0042254	P	Obg family GTPase CgtA		PNA_03_3_00124	1
PANS_99_15_03275	GO:0003723	F	RNase adapter RapZ		PNA_03_3_00125	1
PANS_99_15_03275	GO:0005524	F	RNase adapter RapZ		PNA_03_3_00174	1
PANS_99_15_03275	GO:0005525	F	RNase adapter RapZ		PNA_03_3_00183	1
PANS_99_15_03276	GO:0016740	F	PTS phosphocarrier protein NPr		PNA_03_3_00274	1
PANS_99_15_04017	GO:0005886	C	HAMP domain-containing histidine kinase		PNA_03_3_00948	1
PANS_99_15_04017	GO:0016021	C	HAMP domain-containing histidine kinase		PNA_03_3_01386	1
PANS_99_15_04017	GO:0000155	F	HAMP domain-containing histidine kinase		PNA_03_3_01485	1
PANS_99_15_04017	GO:0000160	P	HAMP domain-containing histidine kinase		PNA_03_3_01508	1
PANS_99_15_04017	GO:0018106	P	HAMP domain-containing histidine kinase		PNA_03_3_01686	1
PANS_99_15_04022	GO:0016616	F	hydroxyacid dehydrogenase		PNA_03_3_01818	1
PANS_99_15_04022	GO:0051287	F	hydroxyacid dehydrogenase		PNA_03_3_03343	1
PANS_99_15_04030	GO:0008233	F	ATP-dependent Clp protease proteolytic subunit		PNA_03_3_03359	1
PANS_99_15_04030	GO:0006508	P	ATP-dependent Clp protease proteolytic subunit		PNA_03_3_03368	1
PNA_03_3_00024	GO:0030288	C	molecular chaperone		PNA_03_3_03383	1
PNA_03_3_00024	GO:0061077	P	molecular chaperone		PNA_03_3_03408	1
PNA_03_3_00024	GO:0071555	P	molecular chaperone		PNA_14_11_01908	1
PNA_03_3_00029	GO:0009289	C	fimbrial protein		PNA_14_11_03131	1
PNA_03_3_00029	GO:0007155	P	fimbrial protein		PNA_14_11_03234	1
PNA_03_3_00055	GO:0005737	C	cold-shock protein		PNA_14_11_03292	1
PNA_03_3_00055	GO:0016021	C	cold-shock protein		PNA_15_2_02511	1
PNA_03_3_00055	GO:0003677	F	cold-shock protein
PNA_03_3_00062	GO:0009002	F	D-alanyl-D-alanine carboxypeptidase (penicillin-binding protein 5/6)
PNA_03_3_00062	GO:0006508	P	D-alanyl-D-alanine carboxypeptidase (penicillin-binding protein 5/6)
PNA_03_3_00062	GO:0008360	P	D-alanyl-D-alanine carboxypeptidase (penicillin-binding protein 5/6)
PNA_03_3_00062	GO:0009252	P	D-alanyl-D-alanine carboxypeptidase (penicillin-binding protein 5/6)
PNA_03_3_00062	GO:0071555	P	D-alanyl-D-alanine carboxypeptidase (penicillin-binding protein 5/6)
PNA_03_3_00066	GO:0005737	C	23S rRNA (pseudouridine(1915)-N(3))-methyltransferase RlmH
PNA_03_3_00066	GO:0070038	F	23S rRNA (pseudouridine(1915)-N(3))-methyltransferase RlmH
PNA_03_3_00066	GO:0031167	P	23S rRNA (pseudouridine(1915)-N(3))-methyltransferase RlmH
PNA_03_3_00067	GO:0005737	C	ribosome silencing factor
PNA_03_3_00067	GO:0017148	P	ribosome silencing factor
PNA_03_3_00067	GO:0042256	P	ribosome silencing factor
PNA_03_3_00067	GO:0090071	P	ribosome silencing factor
PNA_03_3_00095	GO:0005737	C	replication initiation negative regulator SeqA
PNA_03_3_00095	GO:0003677	F	replication initiation negative regulator SeqA
PNA_03_3_00095	GO:0006355	P	replication initiation negative regulator SeqA
PNA_03_3_00095	GO:0032297	P	replication initiation negative regulator SeqA
PNA_03_3_00099	GO:0004601	F	carboxymuconolactone decarboxylase family protein
PNA_03_3_00099	GO:0051920	F	carboxymuconolactone decarboxylase family protein
PNA_03_3_00099	GO:0098869	P	carboxymuconolactone decarboxylase family protein
PNA_03_3_00111	GO:0008080	F	GNAT family N-acetyltransferase
PNA_03_3_00112	GO:0005737	C	citrate synthase
PNA_03_3_00112	GO:0004108	F	citrate synthase
PNA_03_3_00112	GO:0006099	P	citrate synthase
PNA_03_3_00114	GO:0005886	C	succinate dehydrogenase membrane anchor subunit
PNA_03_3_00114	GO:0016021	C	succinate dehydrogenase membrane anchor subunit
PNA_03_3_00114	GO:0000104	F	succinate dehydrogenase membrane anchor subunit
PNA_03_3_00114	GO:0009055	F	succinate dehydrogenase membrane anchor subunit
PNA_03_3_00114	GO:0020037	F	succinate dehydrogenase membrane anchor subunit
PNA_03_3_00114	GO:0046872	F	succinate dehydrogenase membrane anchor subunit
PNA_03_3_00114	GO:0006099	P	succinate dehydrogenase membrane anchor subunit
PNA_03_3_00114	GO:0022900	P	succinate dehydrogenase membrane anchor subunit
PNA_03_3_00115	GO:0005886	C	succinate dehydrogenase flavoprotein subunit
PNA_03_3_00115	GO:0008177	F	succinate dehydrogenase flavoprotein subunit
PNA_03_3_00115	GO:0050660	F	succinate dehydrogenase flavoprotein subunit
PNA_03_3_00115	GO:0006099	P	succinate dehydrogenase flavoprotein subunit
PNA_03_3_00115	GO:0022900	P	succinate dehydrogenase flavoprotein subunit
PNA_03_3_00116	GO:0008177	F	succinate dehydrogenase iron-sulfur subunit
PNA_03_3_00116	GO:0009055	F	succinate dehydrogenase iron-sulfur subunit
PNA_03_3_00116	GO:0046872	F	succinate dehydrogenase iron-sulfur subunit
PNA_03_3_00116	GO:0051537	F	succinate dehydrogenase iron-sulfur subunit
PNA_03_3_00116	GO:0051538	F	succinate dehydrogenase iron-sulfur subunit
PNA_03_3_00116	GO:0051539	F	succinate dehydrogenase iron-sulfur subunit
PNA_03_3_00116	GO:0006099	P	succinate dehydrogenase iron-sulfur subunit
PNA_03_3_00116	GO:0022900	P	succinate dehydrogenase iron-sulfur subunit
PNA_03_3_00124	GO:0016021	C	cyd operon protein YbgE
PNA_03_3_00125	GO:0047617	F	tol-pal system-associated acyl-CoA thioesterase
PNA_03_3_00134	GO:0005737	C	methylated-DNA--[protein]-cysteine S-methyltransferase
PNA_03_3_00134	GO:0003908	F	methylated-DNA--[protein]-cysteine S-methyltransferase
PNA_03_3_00134	GO:0006307	P	methylated-DNA--[protein]-cysteine S-methyltransferase
PNA_03_3_00134	GO:0032259	P	methylated-DNA--[protein]-cysteine S-methyltransferase
PNA_03_3_00165	GO:0061799	F	cyclic pyranopterin monophosphate synthase MoaC
PNA_03_3_00165	GO:0006777	P	cyclic pyranopterin monophosphate synthase MoaC
PNA_03_3_00166	GO:0061799	F	molybdopterin synthase sulfur carrier subunit
PNA_03_3_00166	GO:0006777	P	molybdopterin synthase sulfur carrier subunit
PNA_03_3_00167	GO:0030366	F	molybdopterin synthase catalytic subunit MoaE
PNA_03_3_00167	GO:0006777	P	molybdopterin synthase catalytic subunit MoaE
PNA_03_3_00174	GO:0016021	C	YbhQ family protein
PNA_03_3_00183	GO:0016021	C	DedA family protein
PNA_03_3_00191	GO:0005737	C	isopentenyl-diphosphate delta-isomerase
PNA_03_3_00191	GO:0004452	F	isopentenyl-diphosphate delta-isomerase
PNA_03_3_00191	GO:0016787	F	isopentenyl-diphosphate delta-isomerase
PNA_03_3_00191	GO:0046872	F	isopentenyl-diphosphate delta-isomerase
PNA_03_3_00191	GO:0008299	P	isopentenyl-diphosphate delta-isomerase
PNA_03_3_00191	GO:0050992	P	isopentenyl-diphosphate delta-isomerase
PNA_03_3_00192	GO:0043190	C	ABC transporter substrate-binding protein
PNA_03_3_00192	GO:0022857	F	ABC transporter substrate-binding protein
PNA_03_3_00192	GO:0055085	P	ABC transporter substrate-binding protein
PNA_03_3_00250	GO:0005886	C	putrescine ABC transporter permease PotH
PNA_03_3_00250	GO:0016021	C	putrescine ABC transporter permease PotH
PNA_03_3_00250	GO:0055085	P	putrescine ABC transporter permease PotH
PNA_03_3_00258	GO:0016020	C	arginine ABC transporter ATP-binding protein ArtP
PNA_03_3_00258	GO:0005524	F	arginine ABC transporter ATP-binding protein ArtP
PNA_03_3_00258	GO:0015424	F	arginine ABC transporter ATP-binding protein ArtP
PNA_03_3_00258	GO:0042626	F	arginine ABC transporter ATP-binding protein ArtP
PNA_03_3_00258	GO:0003333	P	arginine ABC transporter ATP-binding protein ArtP
PNA_03_3_00261	GO:0008745	F	N-acetylmuramoyl-L-alanine amidase
PNA_03_3_00261	GO:0009253	P	N-acetylmuramoyl-L-alanine amidase
PNA_03_3_00266	GO:0005737	C	Cold shock-like protein CspD
PNA_03_3_00266	GO:0003677	F	Cold shock-like protein CspD
PNA_03_3_00266	GO:0006355	P	Cold shock-like protein CspD
PNA_03_3_00267	GO:0008233	F	ATP-dependent Clp protease adapter ClpS
PNA_03_3_00267	GO:0006508	P	ATP-dependent Clp protease adapter ClpS
PNA_03_3_00267	GO:0030163	P	ATP-dependent Clp protease adapter ClpS
PNA_03_3_00269	GO:0005829	C	translation initiation factor IF-1
PNA_03_3_00269	GO:0003743	F	translation initiation factor IF-1
PNA_03_3_00269	GO:0005515	F	translation initiation factor IF-1
PNA_03_3_00269	GO:0016787	F	translation initiation factor IF-1
PNA_03_3_00269	GO:0019843	F	translation initiation factor IF-1
PNA_03_3_00269	GO:0043022	F	translation initiation factor IF-1
PNA_03_3_00269	GO:0006413	P	translation initiation factor IF-1
PNA_03_3_00274	GO:0043565	F	leucine-responsive transcriptional regulator Lrp
PNA_03_3_00276	GO:0042597	C	outer membrane lipoprotein chaperone LolA
PNA_03_3_00276	GO:0042953	P	outer membrane lipoprotein chaperone LolA
PNA_03_3_00276	GO:0044874	P	outer membrane lipoprotein chaperone LolA
PNA_03_3_00287	GO:0005840	C	30S ribosomal protein S1
PNA_03_3_00287	GO:0003723	F	30S ribosomal protein S1
PNA_03_3_00287	GO:0003735	F	30S ribosomal protein S1
PNA_03_3_00287	GO:0006412	P	30S ribosomal protein S1
PNA_03_3_00288	GO:0005694	C	integration host factor subunit beta
PNA_03_3_00288	GO:0003677	F	integration host factor subunit beta
PNA_03_3_00288	GO:0006310	P	integration host factor subunit beta
PNA_03_3_00288	GO:0006355	P	integration host factor subunit beta
PNA_03_3_00288	GO:0006417	P	integration host factor subunit beta
PNA_03_3_00323	GO:0005737	C	bifunctional 3-hydroxydecanoyl-ACP dehydratase/trans-2-decenoyl-ACP isomerase
PNA_03_3_00323	GO:0004317	F	bifunctional 3-hydroxydecanoyl-ACP dehydratase/trans-2-decenoyl-ACP isomerase
PNA_03_3_00323	GO:0008659	F	bifunctional 3-hydroxydecanoyl-ACP dehydratase/trans-2-decenoyl-ACP isomerase
PNA_03_3_00323	GO:0008693	F	bifunctional 3-hydroxydecanoyl-ACP dehydratase/trans-2-decenoyl-ACP isomerase
PNA_03_3_00323	GO:0034017	F	bifunctional 3-hydroxydecanoyl-ACP dehydratase/trans-2-decenoyl-ACP isomerase
PNA_03_3_00323	GO:0047451	F	bifunctional 3-hydroxydecanoyl-ACP dehydratase/trans-2-decenoyl-ACP isomerase
PNA_03_3_00323	GO:0006633	P	bifunctional 3-hydroxydecanoyl-ACP dehydratase/trans-2-decenoyl-ACP isomerase
PNA_03_3_00351	GO:0061579	F	autoinducer synthase
PNA_03_3_00351	GO:0009372	P	autoinducer synthase
PNA_03_3_01147	GO:0004252	F	carboxy terminal-processing peptidase
PNA_03_3_01147	GO:0006508	P	carboxy terminal-processing peptidase
PNA_03_3_01386	GO:0043565	F	Lrp/AsnC family transcriptional regulator
PNA_03_3_01463	GO:0003677	F	DeoR/GlpR transcriptional regulator
PNA_03_3_01463	GO:0003700	F	DeoR/GlpR transcriptional regulator
PNA_03_3_01463	GO:0006355	P	DeoR/GlpR transcriptional regulator
PNA_03_3_01485	GO:0016740	F	glycosyltransferase
PNA_03_3_01508	GO:0016021	C	EpsG family protein
PNA_03_3_01510	GO:0004725	F	protein tyrosine phosphatase
PNA_03_3_01510	GO:0035335	P	protein tyrosine phosphatase
PNA_03_3_01525	GO:0003677	F	two-component system response regulator BaeR
PNA_03_3_01525	GO:0000160	P	two-component system response regulator BaeR
PNA_03_3_01525	GO:0006355	P	two-component system response regulator BaeR
PNA_03_3_01542	GO:0004471	F	NAD-dependent malic enzyme
PNA_03_3_01542	GO:0008948	F	NAD-dependent malic enzyme
PNA_03_3_01542	GO:0046872	F	NAD-dependent malic enzyme
PNA_03_3_01542	GO:0051287	F	NAD-dependent malic enzyme
PNA_03_3_01609	GO:0005886	C	stress response protein ElaB
PNA_03_3_01609	GO:0016021	C	stress response protein ElaB
PNA_03_3_01609	GO:0043022	F	stress response protein ElaB
PNA_03_3_01618	GO:0005886	C	NADH-quinone oxidoreductase subunit NuoI
PNA_03_3_01618	GO:0005506	F	NADH-quinone oxidoreductase subunit NuoI
PNA_03_3_01618	GO:0048038	F	NADH-quinone oxidoreductase subunit NuoI
PNA_03_3_01618	GO:0050136	F	NADH-quinone oxidoreductase subunit NuoI
PNA_03_3_01618	GO:0051539	F	NADH-quinone oxidoreductase subunit NuoI
PNA_03_3_01624	GO:0005886	C	NADH-quinone oxidoreductase subunit B
PNA_03_3_01624	GO:0005506	F	NADH-quinone oxidoreductase subunit B
PNA_03_3_01624	GO:0008137	F	NADH-quinone oxidoreductase subunit B
PNA_03_3_01624	GO:0048038	F	NADH-quinone oxidoreductase subunit B
PNA_03_3_01624	GO:0051539	F	NADH-quinone oxidoreductase subunit B
PNA_03_3_01624	GO:0022900	P	NADH-quinone oxidoreductase subunit B
PNA_03_3_01629	GO:0005737	C	5'-deoxynucleotidase
PNA_03_3_01629	GO:0000166	F	5'-deoxynucleotidase
PNA_03_3_01629	GO:0002953	F	5'-deoxynucleotidase
PNA_03_3_01629	GO:0046872	F	5'-deoxynucleotidase
PNA_03_3_01629	GO:0016311	P	5'-deoxynucleotidase
PNA_03_3_01641	GO:0016817	F	NUDIX hydrolase YfcD
PNA_03_3_01641	GO:0016853	F	NUDIX hydrolase YfcD
PNA_03_3_01641	GO:0046872	F	NUDIX hydrolase YfcD
PNA_03_3_01652	GO:0016829	F	UbiX family flavin prenyltransferase
PNA_03_3_01652	GO:0106141	F	UbiX family flavin prenyltransferase
PNA_03_3_01655	GO:0005887	C	cell division protein DedD
PNA_03_3_01655	GO:0030428	C	cell division protein DedD
PNA_03_3_01655	GO:0042834	F	cell division protein DedD
PNA_03_3_01655	GO:0032506	P	cell division protein DedD
PNA_03_3_01664	GO:0003677	F	transcriptional regulator TctD
PNA_03_3_01664	GO:0000160	P	transcriptional regulator TctD
PNA_03_3_01664	GO:0006355	P	transcriptional regulator TctD
PNA_03_3_01678	GO:0005840	C	50S ribosomal protein L3 N(5)-glutamine methyltransferase
PNA_03_3_01678	GO:0003676	F	50S ribosomal protein L3 N(5)-glutamine methyltransferase
PNA_03_3_01678	GO:0009007	F	50S ribosomal protein L3 N(5)-glutamine methyltransferase
PNA_03_3_01678	GO:0036009	F	50S ribosomal protein L3 N(5)-glutamine methyltransferase
PNA_03_3_01678	GO:0018364	P	50S ribosomal protein L3 N(5)-glutamine methyltransferase
PNA_03_3_01678	GO:0032775	P	50S ribosomal protein L3 N(5)-glutamine methyltransferase
PNA_03_3_01680	GO:0016021	C	HAMP domain-containing protein
PNA_03_3_01680	GO:0004888	F	HAMP domain-containing protein
PNA_03_3_01680	GO:0006935	P	HAMP domain-containing protein
PNA_03_3_01680	GO:0007165	P	HAMP domain-containing protein
PNA_03_3_01683	GO:0005737	C	acetyl-CoA C-acyltransferase FadI
PNA_03_3_01683	GO:0003988	F	acetyl-CoA C-acyltransferase FadI
PNA_03_3_01683	GO:0006635	P	acetyl-CoA C-acyltransferase FadI
PNA_03_3_01686	GO:0016020	C	phospholipid-binding lipoprotein MlaA
PNA_03_3_01726	GO:0005886	C	sugar ABC transporter permease
PNA_03_3_01726	GO:0016021	C	sugar ABC transporter permease
PNA_03_3_01726	GO:0055085	P	sugar ABC transporter permease
PNA_03_3_01747	GO:0005737	C	glucokinase
PNA_03_3_01747	GO:0016021	C	glucokinase
PNA_03_3_01747	GO:0004340	F	glucokinase
PNA_03_3_01747	GO:0005524	F	glucokinase
PNA_03_3_01747	GO:0005536	F	glucokinase
PNA_03_3_01747	GO:0006096	P	glucokinase
PNA_03_3_01747	GO:0051156	P	glucokinase
PNA_03_3_01752	GO:0005886	C	Nramp family divalent metal transporter
PNA_03_3_01752	GO:0016021	C	Nramp family divalent metal transporter
PNA_03_3_01752	GO:0015293	F	Nramp family divalent metal transporter
PNA_03_3_01752	GO:0046872	F	Nramp family divalent metal transporter
PNA_03_3_01752	GO:0046873	F	Nramp family divalent metal transporter
PNA_03_3_01752	GO:0030001	P	Nramp family divalent metal transporter
PNA_03_3_01752	GO:0055085	P	Nramp family divalent metal transporter
PNA_03_3_01759	GO:0016021	C	formate/nitrite transporter family protein
PNA_03_3_01759	GO:0022857	F	formate/nitrite transporter family protein
PNA_03_3_01759	GO:0055085	P	formate/nitrite transporter family protein
PNA_03_3_01770	GO:0005737	C	phosphocarrier protein Hpr
PNA_03_3_01770	GO:0016740	F	phosphocarrier protein Hpr
PNA_03_3_01770	GO:0009401	P	phosphocarrier protein Hpr
PNA_03_3_01772	GO:0008982	F	PTS glucose transporter subunit IIA
PNA_03_3_01772	GO:0103111	F	PTS glucose transporter subunit IIA
PNA_03_3_01772	GO:0009401	P	PTS glucose transporter subunit IIA
PNA_03_3_01772	GO:0034219	P	PTS glucose transporter subunit IIA
PNA_03_3_01797	GO:0005886	C	ABC transporter permease
PNA_03_3_01797	GO:0016021	C	ABC transporter permease
PNA_03_3_01797	GO:0022857	F	ABC transporter permease
PNA_03_3_01797	GO:0055085	P	ABC transporter permease
PNA_03_3_01818	GO:0016021	C	glycine cleavage system transcriptional repressor
PNA_03_3_01819	GO:0004601	F	thioredoxin-dependent thiol peroxidase
PNA_03_3_01819	GO:0051920	F	thioredoxin-dependent thiol peroxidase
PNA_03_3_01819	GO:0098869	P	thioredoxin-dependent thiol peroxidase
PNA_03_3_01852	GO:0003922	F	glutamine-hydrolyzing GMP synthase
PNA_03_3_01852	GO:0005524	F	glutamine-hydrolyzing GMP synthase
PNA_03_3_01852	GO:0008483	F	glutamine-hydrolyzing GMP synthase
PNA_03_3_01852	GO:0016462	F	glutamine-hydrolyzing GMP synthase
PNA_03_3_01852	GO:0006177	P	glutamine-hydrolyzing GMP synthase
PNA_03_3_01852	GO:0006541	P	glutamine-hydrolyzing GMP synthase
PNA_03_3_01853	GO:0000166	F	IMP dehydrogenase
PNA_03_3_01853	GO:0003938	F	IMP dehydrogenase
PNA_03_3_01853	GO:0046872	F	IMP dehydrogenase
PNA_03_3_01853	GO:0006177	P	IMP dehydrogenase
PNA_03_3_01867	GO:0005737	C	nucleoside-diphosphate kinase
PNA_03_3_01867	GO:0004550	F	nucleoside-diphosphate kinase
PNA_03_3_01867	GO:0005524	F	nucleoside-diphosphate kinase
PNA_03_3_01867	GO:0046872	F	nucleoside-diphosphate kinase
PNA_03_3_01867	GO:0006165	P	nucleoside-diphosphate kinase
PNA_03_3_01867	GO:0006183	P	nucleoside-diphosphate kinase
PNA_03_3_01867	GO:0006228	P	nucleoside-diphosphate kinase
PNA_03_3_01867	GO:0006241	P	nucleoside-diphosphate kinase
PNA_03_3_01873	GO:0005737	C	IscS subfamily cysteine desulfurase
PNA_03_3_01873	GO:0030170	F	IscS subfamily cysteine desulfurase
PNA_03_3_01873	GO:0031071	F	IscS subfamily cysteine desulfurase
PNA_03_3_01873	GO:0046872	F	IscS subfamily cysteine desulfurase
PNA_03_3_01873	GO:0051537	F	IscS subfamily cysteine desulfurase
PNA_03_3_01873	GO:0044571	P	IscS subfamily cysteine desulfurase
PNA_03_3_01874	GO:0003690	F	Fe-S cluster assembly transcriptional regulator IscR
PNA_03_3_01874	GO:0003700	F	Fe-S cluster assembly transcriptional regulator IscR
PNA_03_3_01874	GO:0005506	F	Fe-S cluster assembly transcriptional regulator IscR
PNA_03_3_01874	GO:0051537	F	Fe-S cluster assembly transcriptional regulator IscR
PNA_03_3_01874	GO:0006355	P	Fe-S cluster assembly transcriptional regulator IscR
PNA_03_3_01876	GO:0008934	F	inositol-1-monophosphatase
PNA_03_3_01876	GO:0046872	F	inositol-1-monophosphatase
PNA_03_3_01876	GO:0052832	F	inositol-1-monophosphatase
PNA_03_3_01876	GO:0052833	F	inositol-1-monophosphatase
PNA_03_3_01876	GO:0031564	P	inositol-1-monophosphatase
PNA_03_3_01876	GO:0046854	P	inositol-1-monophosphatase
PNA_03_3_01876	GO:0046855	P	inositol-1-monophosphatase
PNA_03_3_01895	GO:0008270	F	tRNA adenosine(34) deaminase TadA
PNA_03_3_01895	GO:0052717	F	tRNA adenosine(34) deaminase TadA
PNA_03_3_01895	GO:0002100	P	tRNA adenosine(34) deaminase TadA
PNA_03_3_01906	GO:0005886	C	elongation factor 4
PNA_03_3_01906	GO:0003746	F	elongation factor 4
PNA_03_3_01906	GO:0003924	F	elongation factor 4
PNA_03_3_01906	GO:0005525	F	elongation factor 4
PNA_03_3_01906	GO:0043022	F	elongation factor 4
PNA_03_3_01906	GO:0006414	P	elongation factor 4
PNA_03_3_01906	GO:0045727	P	elongation factor 4
PNA_03_3_03343	GO:0016021	C	FxsA family protein
PNA_03_3_03348	GO:0005737	C	elongation factor P
PNA_03_3_03348	GO:0003746	F	elongation factor P
PNA_03_3_03348	GO:0006414	P	elongation factor P
PNA_03_3_03357	GO:0005840	C	50S ribosomal protein L13
PNA_03_3_03357	GO:0003735	F	50S ribosomal protein L13
PNA_03_3_03357	GO:0006412	P	50S ribosomal protein L13
PNA_03_3_03359	GO:0006749	P	stringent starvation protein A
PNA_03_3_03368	GO:0006417	P	ribosome hibernation promoting factor
PNA_03_3_03370	GO:0005737	C	LPS export ABC transporter ATP-binding protein
PNA_03_3_03370	GO:0043190	C	LPS export ABC transporter ATP-binding protein
PNA_03_3_03370	GO:0005524	F	LPS export ABC transporter ATP-binding protein
PNA_03_3_03370	GO:0042626	F	LPS export ABC transporter ATP-binding protein
PNA_03_3_03370	GO:0055085	P	LPS export ABC transporter ATP-binding protein
PNA_03_3_03371	GO:0042597	C	lipopolysaccharide ABC transporter substrate-binding protein LptA
PNA_03_3_03371	GO:0001530	F	lipopolysaccharide ABC transporter substrate-binding protein LptA
PNA_03_3_03371	GO:0015920	P	lipopolysaccharide ABC transporter substrate-binding protein LptA
PNA_03_3_03371	GO:0043165	P	lipopolysaccharide ABC transporter substrate-binding protein LptA
PNA_03_3_03372	GO:0005887	C	LPS export ABC transporter periplasmic protein LptC
PNA_03_3_03372	GO:0015221	F	LPS export ABC transporter periplasmic protein LptC
PNA_03_3_03372	GO:0015920	P	LPS export ABC transporter periplasmic protein LptC
PNA_03_3_03372	GO:0043165	P	LPS export ABC transporter periplasmic protein LptC
PNA_03_3_03375	GO:0016021	C	calcium/sodium antiporter
PNA_03_3_03375	GO:0055085	P	calcium/sodium antiporter
PNA_03_3_03376	GO:0005524	F	phospholipid ABC transporter ATP-binding protein MlaF
PNA_03_3_03376	GO:0042626	F	phospholipid ABC transporter ATP-binding protein MlaF
PNA_03_3_03376	GO:0055085	P	phospholipid ABC transporter ATP-binding protein MlaF
PNA_03_3_03383	GO:0003677	F	helix-turn-helix domain-containing protein
PNA_03_3_03385	GO:0005840	C	50S ribosomal protein L21
PNA_03_3_03385	GO:0003735	F	50S ribosomal protein L21
PNA_03_3_03385	GO:0019843	F	50S ribosomal protein L21
PNA_03_3_03385	GO:0006412	P	50S ribosomal protein L21
PNA_03_3_03396	GO:0005737	C	ribosome maturation factor RimP
PNA_03_3_03396	GO:0042274	P	ribosome maturation factor RimP
PNA_03_3_03399	GO:0005737	C	ribosome-binding factor A
PNA_03_3_03399	GO:0030490	P	ribosome-binding factor A
PNA_03_3_03400	GO:0003723	F	tRNA pseudouridine(55) synthase TruB
PNA_03_3_03400	GO:0016829	F	tRNA pseudouridine(55) synthase TruB
PNA_03_3_03400	GO:0106029	F	tRNA pseudouridine(55) synthase TruB
PNA_03_3_03400	GO:0031119	P	tRNA pseudouridine(55) synthase TruB
PNA_03_3_03401	GO:0005840	C	30S ribosomal protein S15
PNA_03_3_03401	GO:0003735	F	30S ribosomal protein S15
PNA_03_3_03401	GO:0019843	F	30S ribosomal protein S15
PNA_03_3_03401	GO:0006412	P	30S ribosomal protein S15
PNA_03_3_03408	GO:0006744	P	SCP2 sterol-binding domain-containing protein
PNA_14_11_00062	GO:0005886	C	ABC transporter permease
PNA_14_11_00062	GO:0016021	C	ABC transporter permease
PNA_14_11_00062	GO:0055085	P	ABC transporter permease
PNA_14_11_03234	GO:0016787	F	2-iminobutanoate/2-iminopropanoate deaminase
PNA_15_2_02013	GO:0005737	C	mannosyl-3-phosphoglycerate phosphatase-related protein
PNA_15_2_02013	GO:0046872	F	mannosyl-3-phosphoglycerate phosphatase-related protein
PNA_15_2_02013	GO:0050531	F	mannosyl-3-phosphoglycerate phosphatase-related protein
PNA_15_2_02013	GO:0016311	P	mannosyl-3-phosphoglycerate phosphatase-related protein
PNA_15_2_02013	GO:0051479	P	mannosyl-3-phosphoglycerate phosphatase-related protein
PNA_15_2_02192	GO:0002161	F	YbaK/prolyl-tRNA synthetase associated domain-containing protein
PNA_15_2_02192	GO:0004812	F	YbaK/prolyl-tRNA synthetase associated domain-containing protein
PNA_15_2_02192	GO:0106074	P	YbaK/prolyl-tRNA synthetase associated domain-containing protein
PNA_15_2_02495	GO:0005886	C	cytochrome ubiquinol oxidase subunit I
PNA_15_2_02495	GO:0016021	C	cytochrome ubiquinol oxidase subunit I
PNA_15_2_02495	GO:0070069	C	cytochrome ubiquinol oxidase subunit I
PNA_15_2_02495	GO:0009055	F	cytochrome ubiquinol oxidase subunit I
PNA_15_2_02495	GO:0046872	F	cytochrome ubiquinol oxidase subunit I
PNA_15_2_02495	GO:0019646	P	cytochrome ubiquinol oxidase subunit I
PNA_15_2_02511	GO:0016787	F	acyl-CoA thioester hydrolase
PNA_15_2_02540	GO:0016021	C	MFS transporter
PNA_15_2_02540	GO:0022857	F	MFS transporter
PNA_15_2_02540	GO:0055085	P	MFS transporter
PNA_15_2_02602	GO:0046872	F	ADP-ribose pyrophosphatase
PNA_15_2_02602	GO:0047631	F	ADP-ribose pyrophosphatase
LMG2632_01479	GO:0008233	F	ATP-dependent Clp protease proteolytic subunit
LMG2632_01479	GO:0006508	P	ATP-dependent Clp protease proteolytic subunit
LMG2632_03032	GO:0008270	F	5-dehydro-4-deoxy-D-glucuronate isomerase
LMG2632_03032	GO:0008697	F	5-dehydro-4-deoxy-D-glucuronate isomerase
LMG2632_03032	GO:0045490	P	5-dehydro-4-deoxy-D-glucuronate isomerase
NCPPB1562_02736	GO:0004846	F	OHCU decarboxylase
NCPPB1562_02736	GO:0016829	F	OHCU decarboxylase
NCPPB1562_02736	GO:0006144	P	OHCU decarboxylase
NCPPB1562_03640	GO:0003824	F	TIGR01777 family protein
NCPPB2282_01320	GO:0005737	C	mannosyl-3-phosphoglycerate phosphatase-related protein
NCPPB2282_01320	GO:0046872	F	mannosyl-3-phosphoglycerate phosphatase-related protein
NCPPB2282_01320	GO:0050531	F	mannosyl-3-phosphoglycerate phosphatase-related protein
NCPPB2282_01320	GO:0016311	P	mannosyl-3-phosphoglycerate phosphatase-related protein
NCPPB2282_01320	GO:0051479	P	mannosyl-3-phosphoglycerate phosphatase-related protein
PANS_07_10_00043	GO:0016616	F	hydroxyacid dehydrogenase
PANS_07_10_00043	GO:0051287	F	hydroxyacid dehydrogenase
PANS_07_10_00627	GO:0016021	C	EmmdR/YeeO family multidrug/toxin efflux MATE transporter
PANS_07_10_00627	GO:0015297	F	EmmdR/YeeO family multidrug/toxin efflux MATE transporter
PANS_07_10_00627	GO:0042910	F	EmmdR/YeeO family multidrug/toxin efflux MATE transporter
PANS_07_10_00627	GO:0042908	P	EmmdR/YeeO family multidrug/toxin efflux MATE transporter
PANS_07_10_00627	GO:0055085	P	EmmdR/YeeO family multidrug/toxin efflux MATE transporter
PANS_07_10_00645	GO:0004722	F	serine/threonine-protein phosphatase
PANS_07_10_00645	GO:0006470	P	serine/threonine-protein phosphatase
PANS_07_10_00724	GO:0003677	F	flagella biosynthesis regulatory protein FliZ
PANS_07_10_00724	GO:0015074	P	flagella biosynthesis regulatory protein FliZ
PANS_07_10_00777	GO:0016021	C	DUF2593 family protein
PANS_07_10_00802	GO:0042597	C	outer membrane lipoprotein chaperone LolA
PANS_07_10_00802	GO:0042953	P	outer membrane lipoprotein chaperone LolA
PANS_07_10_00802	GO:0044874	P	outer membrane lipoprotein chaperone LolA
PANS_07_10_00842	GO:0005737	C	cell division protein ZapC
PANS_07_10_00842	GO:0000917	P	cell division protein ZapC
PANS_07_10_00842	GO:0043093	P	cell division protein ZapC
PANS_07_10_00919	GO:0044780	P	flagellar biosynthesis protein FlgN
PANS_07_10_00939	GO:0005737	C	ketoacyl-ACP synthase III
PANS_07_10_00939	GO:0004315	F	ketoacyl-ACP synthase III
PANS_07_10_00939	GO:0033818	F	ketoacyl-ACP synthase III
PANS_07_10_00939	GO:0006633	P	ketoacyl-ACP synthase III
PANS_07_10_01136	GO:0005737	C	aminoacyl-tRNA hydrolase
PANS_07_10_01136	GO:0004045	F	aminoacyl-tRNA hydrolase
PANS_07_10_01136	GO:0006412	P	aminoacyl-tRNA hydrolase
PANS_07_10_01137	GO:0016021	C	stress-induced protein YchH
PANS_07_10_01171	GO:0005886	C	ABC transporter permease
PANS_07_10_01171	GO:0016021	C	ABC transporter permease
PANS_07_10_01171	GO:0022857	F	ABC transporter permease
PANS_07_10_01171	GO:0055085	P	ABC transporter permease
PANS_07_10_01245	GO:0016021	C	DUF1656 domain-containing protein
PANS_07_10_01381	GO:0005887	C	Tol-Pal system protein TolQ
PANS_07_10_01381	GO:0007049	P	Tol-Pal system protein TolQ
PANS_07_10_01381	GO:0043213	P	Tol-Pal system protein TolQ
PANS_07_10_01381	GO:0051301	P	Tol-Pal system protein TolQ
PANS_07_10_01389	GO:0045252	C	2-oxoglutarate dehydrogenase complex dihydrolipoyllysine-residue succinyltransferase
PANS_07_10_01389	GO:0004149	F	2-oxoglutarate dehydrogenase complex dihydrolipoyllysine-residue succinyltransferase
PANS_07_10_01389	GO:0006099	P	2-oxoglutarate dehydrogenase complex dihydrolipoyllysine-residue succinyltransferase
PANS_07_10_01389	GO:0033512	P	2-oxoglutarate dehydrogenase complex dihydrolipoyllysine-residue succinyltransferase
PANS_07_10_01840	GO:0003700	F	zinc uptake transcriptional repressor Zur
PANS_07_10_01840	GO:0006355	P	zinc uptake transcriptional repressor Zur
PANS_07_10_01888	GO:0003677	F	response regulator
PANS_07_10_01888	GO:0004190	F	response regulator
PANS_07_10_01888	GO:0000160	P	response regulator
PANS_07_10_01888	GO:0006355	P	response regulator
PANS_07_10_01888	GO:0006508	P	response regulator
PANS_07_10_02105	GO:0016987	F	RNA polymerase factor sigma-54
PANS_07_10_02105	GO:0003677	F	RNA polymerase factor sigma-54
PANS_07_10_02105	GO:0003899	F	RNA polymerase factor sigma-54
PANS_07_10_02105	GO:2000142	P	RNA polymerase factor sigma-54
PANS_07_10_02105	GO:0045893	P	RNA polymerase factor sigma-54
PANS_07_10_02105	GO:0001216	F	RNA polymerase factor sigma-54
PANS_07_10_02117	GO:0003677	F	BolA family iron metabolism protein IbaG
PANS_07_10_02150	GO:0043365	F	anaerobic ribonucleoside-triphosphate reductase-activating protein
PANS_07_10_02150	GO:0046872	F	anaerobic ribonucleoside-triphosphate reductase-activating protein
PANS_07_10_02150	GO:0051539	F	anaerobic ribonucleoside-triphosphate reductase-activating protein
PANS_07_10_02665	GO:0005694	C	DNA topoisomerase IV subunit B
PANS_07_10_02665	GO:0003677	F	DNA topoisomerase IV subunit B
PANS_07_10_02665	GO:0003918	F	DNA topoisomerase IV subunit B
PANS_07_10_02665	GO:0005524	F	DNA topoisomerase IV subunit B
PANS_07_10_02665	GO:0006265	P	DNA topoisomerase IV subunit B
PANS_07_10_02665	GO:0007059	P	DNA topoisomerase IV subunit B
PANS_07_10_02669	GO:0008270	F	ketose-bisphosphate aldolase
PANS_07_10_02669	GO:0009025	F	ketose-bisphosphate aldolase
PANS_07_10_02669	GO:0005975	P	ketose-bisphosphate aldolase
PANS_07_10_02670	GO:0008270	F	class II fructose-bisphosphate aldolase family protein
PANS_07_10_02670	GO:0016832	F	class II fructose-bisphosphate aldolase family protein
PANS_07_10_02670	GO:0005975	P	class II fructose-bisphosphate aldolase family protein
PANS_07_10_02671	GO:0005886	C	PTS fructose transporter subunit IIC
PANS_07_10_02671	GO:0016021	C	PTS fructose transporter subunit IIC
PANS_07_10_02671	GO:0005351	F	PTS fructose transporter subunit IIC
PANS_07_10_02671	GO:0008982	F	PTS fructose transporter subunit IIC
PANS_07_10_02671	GO:0103111	F	PTS fructose transporter subunit IIC
PANS_07_10_02671	GO:0009401	P	PTS fructose transporter subunit IIC
PANS_07_10_02671	GO:0034219	P	PTS fructose transporter subunit IIC
PANS_07_10_02671	GO:1902600	P	PTS fructose transporter subunit IIC
PANS_07_10_02672	GO:0022877	F	PTS fructose transporter subunit IIB
PANS_07_10_02672	GO:0103111	F	PTS fructose transporter subunit IIB
PANS_07_10_02672	GO:0009401	P	PTS fructose transporter subunit IIB
PANS_07_10_02672	GO:0015755	P	PTS fructose transporter subunit IIB
PANS_07_10_02735	GO:0004731	F	purine-nucleoside phosphorylase
PANS_07_10_02735	GO:0042278	P	purine-nucleoside phosphorylase
PANS_07_10_02788	GO:0008982	F	PTS mannitol transporter subunit IIB
PANS_07_10_02788	GO:0103111	F	PTS mannitol transporter subunit IIB
PANS_07_10_02788	GO:0009401	P	PTS mannitol transporter subunit IIB
PANS_07_10_02788	GO:0034219	P	PTS mannitol transporter subunit IIB
PANS_07_10_02894	GO:0046872	F	6-carboxytetrahydropterin synthase QueD
PANS_07_10_02894	GO:0070497	F	6-carboxytetrahydropterin synthase QueD
PANS_07_10_02894	GO:0008616	P	6-carboxytetrahydropterin synthase QueD
PANS_07_10_04327	GO:0016021	C	chemotaxis protein
PANS_07_10_04327	GO:0004888	F	chemotaxis protein
PANS_07_10_04327	GO:0006935	P	chemotaxis protein
PANS_07_10_04327	GO:0007165	P	chemotaxis protein
PANS_07_12_00117	GO:0016021	C	EmmdR/YeeO family multidrug/toxin efflux MATE transporter
PANS_07_12_00117	GO:0015297	F	EmmdR/YeeO family multidrug/toxin efflux MATE transporter
PANS_07_12_00117	GO:0042910	F	EmmdR/YeeO family multidrug/toxin efflux MATE transporter
PANS_07_12_00117	GO:0042908	P	EmmdR/YeeO family multidrug/toxin efflux MATE transporter
PANS_07_12_00117	GO:0055085	P	EmmdR/YeeO family multidrug/toxin efflux MATE transporter
PANS_07_12_01137	GO:0016021	C	stress-induced protein YchH
PANS_07_14_00439	GO:0003849	F	3-deoxy-7-phosphoheptulonate synthase AroG
PANS_07_14_00439	GO:0008652	P	3-deoxy-7-phosphoheptulonate synthase AroG
PANS_07_14_00439	GO:0009073	P	3-deoxy-7-phosphoheptulonate synthase AroG
PANS_07_14_00439	GO:0009423	P	3-deoxy-7-phosphoheptulonate synthase AroG
PANS_07_14_00540	GO:0016021	C	membrane protein
PANS_07_14_00798	GO:0005524	F	ABC transporter ATP-binding protein
PANS_07_14_00798	GO:0042626	F	ABC transporter ATP-binding protein
PANS_07_14_00798	GO:0015833	P	ABC transporter ATP-binding protein
PANS_07_14_00798	GO:0055085	P	ABC transporter ATP-binding protein
PANS_07_14_02385	GO:0046872	F	ADP-ribose pyrophosphatase
PANS_07_14_02385	GO:0047631	F	ADP-ribose pyrophosphatase
PANS_07_14_02447	GO:0016021	C	MFS transporter
PANS_07_14_02447	GO:0022857	F	MFS transporter
PANS_07_14_02447	GO:0055085	P	MFS transporter
PANS_07_14_02475	GO:0016787	F	acyl-CoA thioester hydrolase
PANS_07_14_02491	GO:0005886	C	cytochrome ubiquinol oxidase subunit I
PANS_07_14_02491	GO:0016021	C	cytochrome ubiquinol oxidase subunit I
PANS_07_14_02491	GO:0070069	C	cytochrome ubiquinol oxidase subunit I
PANS_07_14_02491	GO:0009055	F	cytochrome ubiquinol oxidase subunit I
PANS_07_14_02491	GO:0046872	F	cytochrome ubiquinol oxidase subunit I
PANS_07_14_02491	GO:0019646	P	cytochrome ubiquinol oxidase subunit I
PANS_07_4_00002	GO:0004471	F	NAD-dependent malic enzyme
PANS_07_4_00002	GO:0008948	F	NAD-dependent malic enzyme
PANS_07_4_00002	GO:0046872	F	NAD-dependent malic enzyme
PANS_07_4_00002	GO:0051287	F	NAD-dependent malic enzyme
PANS_07_4_00019	GO:0003677	F	two-component system response regulator BaeR
PANS_07_4_00019	GO:0000160	P	two-component system response regulator BaeR
PANS_07_4_00019	GO:0006355	P	two-component system response regulator BaeR
PANS_07_4_00034	GO:0004725	F	protein tyrosine phosphatase
PANS_07_4_00034	GO:0035335	P	protein tyrosine phosphatase
PANS_07_4_00036	GO:0016021	C	EpsG family protein
PANS_07_4_00039	GO:0016757	F	amylovoran biosynthesis protein AmsD
PANS_07_4_00050	GO:0008830	F	dTDP-4-dehydrorhamnose 3,5-epimerase
PANS_07_4_00050	GO:0019305	P	dTDP-4-dehydrorhamnose 3,5-epimerase
PANS_07_4_00059	GO:0016740	F	glycosyltransferase
PANS_07_4_00065	GO:0002161	F	YbaK/prolyl-tRNA synthetase associated domain-containing protein
PANS_07_4_00065	GO:0004812	F	YbaK/prolyl-tRNA synthetase associated domain-containing protein
PANS_07_4_00065	GO:0106074	P	YbaK/prolyl-tRNA synthetase associated domain-containing protein
PANS_07_4_00081	GO:0003677	F	DeoR/GlpR transcriptional regulator
PANS_07_4_00081	GO:0003700	F	DeoR/GlpR transcriptional regulator
PANS_07_4_00081	GO:0006355	P	DeoR/GlpR transcriptional regulator
PANS_07_4_00123	GO:0016021	C	GlxA family transcriptional regulator
PANS_07_4_00123	GO:0003700	F	GlxA family transcriptional regulator
PANS_07_4_00123	GO:0043565	F	GlxA family transcriptional regulator
PANS_07_4_00123	GO:0006355	P	GlxA family transcriptional regulator
PANS_07_4_00143	GO:0005886	C	ABC transporter permease
PANS_07_4_00143	GO:0016021	C	ABC transporter permease
PANS_07_4_00143	GO:0055085	P	ABC transporter permease
PANS_07_4_00144	GO:0005524	F	ABC transporter ATP-binding protein
PANS_07_4_00144	GO:0042626	F	ABC transporter ATP-binding protein
PANS_07_4_00144	GO:0055085	P	ABC transporter ATP-binding protein
PANS_07_4_00150	GO:0043565	F	Lrp/AsnC family transcriptional regulator
PANS_07_4_00168	GO:0005886	C	sugar ABC transporter ATP-binding protein
PANS_07_4_00168	GO:0005524	F	sugar ABC transporter ATP-binding protein
PANS_07_4_00168	GO:0015611	F	sugar ABC transporter ATP-binding protein
PANS_07_4_00168	GO:0043211	F	sugar ABC transporter ATP-binding protein
PANS_07_4_00168	GO:0015752	P	sugar ABC transporter ATP-binding protein
PANS_07_4_00171	GO:0016787	F	D-lyxose/D-mannose family sugar isomerase
PANS_07_4_00171	GO:0016853	F	D-lyxose/D-mannose family sugar isomerase
PANS_07_4_00862	GO:0005576	C	murein lipoprotein
PANS_07_4_00862	GO:0005618	C	murein lipoprotein
PANS_07_4_00862	GO:0009279	C	murein lipoprotein
PANS_07_4_00862	GO:0008289	F	murein lipoprotein
PANS_07_4_00862	GO:0042834	F	murein lipoprotein
PANS_07_4_00862	GO:0030258	P	murein lipoprotein
PANS_07_4_00862	GO:0043580	P	murein lipoprotein
PANS_07_4_00879	GO:0016787	F	endopeptidase
PANS_07_4_00881	GO:0004602	F	glutathione peroxidase
PANS_07_4_00881	GO:0051920	F	glutathione peroxidase
PANS_07_4_00881	GO:0006979	P	glutathione peroxidase
PANS_07_4_00881	GO:0098869	P	glutathione peroxidase
PANS_07_4_00883	GO:0003677	F	integration host factor subunit alpha
PANS_07_4_00883	GO:0006310	P	integration host factor subunit alpha
PANS_07_4_00883	GO:0006355	P	integration host factor subunit alpha
PANS_07_4_00883	GO:0006417	P	integration host factor subunit alpha
PANS_07_4_00885	GO:0005737	C	phenylalanine--tRNA ligase subunit alpha
PANS_07_4_00885	GO:0000049	F	phenylalanine--tRNA ligase subunit alpha
PANS_07_4_00885	GO:0000287	F	phenylalanine--tRNA ligase subunit alpha
PANS_07_4_00885	GO:0004826	F	phenylalanine--tRNA ligase subunit alpha
PANS_07_4_00885	GO:0005524	F	phenylalanine--tRNA ligase subunit alpha
PANS_07_4_00885	GO:0006432	P	phenylalanine--tRNA ligase subunit alpha
PANS_07_4_00886	GO:0005840	C	50S ribosomal protein L20
PANS_07_4_00886	GO:0003735	F	50S ribosomal protein L20
PANS_07_4_00886	GO:0019843	F	50S ribosomal protein L20
PANS_07_4_00886	GO:0000027	P	50S ribosomal protein L20
PANS_07_4_00886	GO:0006412	P	50S ribosomal protein L20
PANS_07_4_00888	GO:0005737	C	translation initiation factor IF-3
PANS_07_4_00888	GO:0003743	F	translation initiation factor IF-3
PANS_07_4_00888	GO:0006413	P	translation initiation factor IF-3
PANS_07_4_00895	GO:0016787	F	metal-dependent hydrolase
PANS_07_4_00927	GO:0016021	C	DotU family type IV/VI secretion system protein
PANS_07_4_00943	GO:0009279	C	lipoprotein localization protein LolB
PANS_07_4_00943	GO:0015031	P	lipoprotein localization protein LolB
PANS_07_4_00943	GO:0044874	P	lipoprotein localization protein LolB
PANS_07_4_00951	GO:0016021	C	chemotaxis protein
PANS_07_4_00951	GO:0004888	F	chemotaxis protein
PANS_07_4_00951	GO:0006935	P	chemotaxis protein
PANS_07_4_00951	GO:0007165	P	chemotaxis protein
PANS_07_4_01067	GO:0005886	C	GlsB/YeaQ/YmgE family stress response membrane protein
PANS_07_4_01067	GO:0016021	C	GlsB/YeaQ/YmgE family stress response membrane protein
PANS_07_4_01114	GO:0031241	C	penicillin-binding protein activator LpoB
PANS_07_4_01114	GO:0030234	F	penicillin-binding protein activator LpoB
PANS_07_4_01114	GO:0008360	P	penicillin-binding protein activator LpoB
PANS_07_4_01114	GO:0009252	P	penicillin-binding protein activator LpoB
PANS_07_4_01114	GO:0050790	P	penicillin-binding protein activator LpoB
PANS_07_4_01116	GO:0016787	F	purine nucleoside phosphoramidase
PANS_07_4_01119	GO:0016888	F	metal-dependent hydrolase
PANS_07_4_01119	GO:0006259	P	metal-dependent hydrolase
PANS_07_4_01125	GO:0005737	C	Acyl carrier protein
PANS_07_4_01125	GO:0000036	F	Acyl carrier protein
PANS_07_4_01125	GO:0031177	F	Acyl carrier protein
PANS_07_4_01125	GO:0006633	P	Acyl carrier protein
PANS_07_4_01126	GO:0004316	F	3-oxoacyl-ACP reductase FabG
PANS_07_4_01126	GO:0051287	F	3-oxoacyl-ACP reductase FabG
PANS_07_4_01126	GO:0102131	F	3-oxoacyl-ACP reductase FabG
PANS_07_4_01126	GO:0102132	F	3-oxoacyl-ACP reductase FabG
PANS_07_4_01126	GO:0006633	P	3-oxoacyl-ACP reductase FabG
PANS_07_4_01137	GO:0042597	C	flagellar assembly peptidoglycan hydrolase FlgJ
PANS_07_4_01137	GO:0004040	F	flagellar assembly peptidoglycan hydrolase FlgJ
PANS_07_4_01137	GO:0016798	F	flagellar assembly peptidoglycan hydrolase FlgJ
PANS_07_4_01137	GO:0008152	P	flagellar assembly peptidoglycan hydrolase FlgJ
PANS_07_4_01137	GO:0044780	P	flagellar assembly peptidoglycan hydrolase FlgJ
PANS_07_4_01142	GO:0009425	C	flagellar hook protein FlgE
PANS_07_4_01142	GO:0071973	P	flagellar hook protein FlgE
PANS_07_4_01144	GO:0030694	C	flagellar basal body rod protein FlgC
PANS_07_4_01144	GO:0071973	P	flagellar basal body rod protein FlgC
PANS_07_4_01155	GO:0004151	F	dihydroorotase
PANS_07_4_01155	GO:0008270	F	dihydroorotase
PANS_07_4_01155	GO:0019856	P	dihydroorotase
PANS_07_4_01155	GO:0044205	P	dihydroorotase
PANS_07_4_01178	GO:0003700	F	AraC family transcriptional regulator
PANS_07_4_01178	GO:0043565	F	AraC family transcriptional regulator
PANS_07_4_01178	GO:0006355	P	AraC family transcriptional regulator
PANS_07_4_01425	GO:0016021	C	SH3 domain-containing protein
PANS_07_4_01434	GO:0016021	C	outer membrane channel protein TolC
PANS_07_4_01434	GO:0019867	C	outer membrane channel protein TolC
PANS_07_4_01434	GO:0015562	F	outer membrane channel protein TolC
PANS_07_4_01434	GO:0055085	P	outer membrane channel protein TolC
PANS_07_4_01438	GO:0016787	F	esterase YqiA
PANS_07_4_01506	GO:0005737	C	deoxyribose-phosphate aldolase
PANS_07_4_01506	GO:0004139	F	deoxyribose-phosphate aldolase
PANS_07_4_01506	GO:0009264	P	deoxyribose-phosphate aldolase
PANS_07_4_01506	GO:0016052	P	deoxyribose-phosphate aldolase
PANS_07_4_01506	GO:0046386	P	deoxyribose-phosphate aldolase
PANS_07_4_01539	GO:0004497	F	antibiotic biosynthesis monooxygenase
PANS_07_4_01542	GO:0005886	C	cytochrome ubiquinol oxidase subunit I
PANS_07_4_01542	GO:0016021	C	cytochrome ubiquinol oxidase subunit I
PANS_07_4_01542	GO:0070069	C	cytochrome ubiquinol oxidase subunit I
PANS_07_4_01542	GO:0009055	F	cytochrome ubiquinol oxidase subunit I
PANS_07_4_01542	GO:0046872	F	cytochrome ubiquinol oxidase subunit I
PANS_07_4_01542	GO:0019646	P	cytochrome ubiquinol oxidase subunit I
PANS_07_4_01543	GO:0005886	C	cytochrome d ubiquinol oxidase subunit II
PANS_07_4_01543	GO:0016021	C	cytochrome d ubiquinol oxidase subunit II
PANS_07_4_01543	GO:0016491	F	cytochrome d ubiquinol oxidase subunit II
PANS_07_4_01554	GO:0005506	F	oxidative damage protection protein
PANS_07_4_01569	GO:0030170	F	YggS family pyridoxal phosphate-dependent enzyme
PANS_07_4_01580	GO:0008792	F	biosynthetic arginine decarboxylase
PANS_07_4_01580	GO:0046872	F	biosynthetic arginine decarboxylase
PANS_07_4_01580	GO:0006527	P	biosynthetic arginine decarboxylase
PANS_07_4_01580	GO:0008295	P	biosynthetic arginine decarboxylase
PANS_07_4_01580	GO:0009446	P	biosynthetic arginine decarboxylase
PANS_07_4_01600	GO:0005960	C	glycine cleavage system protein GcvH
PANS_07_4_01600	GO:0019464	P	glycine cleavage system protein GcvH
PANS_07_4_01610	GO:0042597	C	bifunctional protein-disulfide isomerase/oxidoreductase DsbC
PANS_07_4_01610	GO:0016853	F	bifunctional protein-disulfide isomerase/oxidoreductase DsbC
PANS_07_4_01612	GO:0005737	C	Peptide chain release factor 2
PANS_07_4_01612	GO:0016149	F	Peptide chain release factor 2
PANS_07_4_01612	GO:0006415	P	Peptide chain release factor 2
PANS_07_4_01676	GO:0043190	C	amino acid ABC transporter permease
PANS_07_4_01676	GO:0022857	F	amino acid ABC transporter permease
PANS_07_4_01676	GO:0006865	P	amino acid ABC transporter permease
PANS_07_4_01676	GO:0055085	P	amino acid ABC transporter permease
PANS_07_4_01693	GO:0005737	C	5'/3'-nucleotidase SurE
PANS_07_4_01693	GO:0000166	F	5'/3'-nucleotidase SurE
PANS_07_4_01693	GO:0004309	F	5'/3'-nucleotidase SurE
PANS_07_4_01693	GO:0008253	F	5'/3'-nucleotidase SurE
PANS_07_4_01693	GO:0008254	F	5'/3'-nucleotidase SurE
PANS_07_4_01693	GO:0046872	F	5'/3'-nucleotidase SurE
PANS_07_4_01693	GO:0016311	P	5'/3'-nucleotidase SurE
PANS_07_4_01720	GO:0016021	C	MULTISPECIES: hypothetical protein
PANS_07_4_01753	GO:0004145	F	spermidine N1-acetyltransferase
PANS_07_4_01817	GO:0005886	C	elongation factor 4
PANS_07_4_01817	GO:0003746	F	elongation factor 4
PANS_07_4_01817	GO:0003924	F	elongation factor 4
PANS_07_4_01817	GO:0005525	F	elongation factor 4
PANS_07_4_01817	GO:0043022	F	elongation factor 4
PANS_07_4_01817	GO:0006414	P	elongation factor 4
PANS_07_4_01817	GO:0045727	P	elongation factor 4
PANS_07_4_01828	GO:0008270	F	tRNA adenosine(34) deaminase TadA
PANS_07_4_01828	GO:0052717	F	tRNA adenosine(34) deaminase TadA
PANS_07_4_01828	GO:0002100	P	tRNA adenosine(34) deaminase TadA
PANS_07_4_01843	GO:0008934	F	inositol-1-monophosphatase
PANS_07_4_01843	GO:0046872	F	inositol-1-monophosphatase
PANS_07_4_01843	GO:0052832	F	inositol-1-monophosphatase
PANS_07_4_01843	GO:0052833	F	inositol-1-monophosphatase
PANS_07_4_01843	GO:0031564	P	inositol-1-monophosphatase
PANS_07_4_01843	GO:0046854	P	inositol-1-monophosphatase
PANS_07_4_01843	GO:0046855	P	inositol-1-monophosphatase
PANS_07_4_01845	GO:0003690	F	Fe-S cluster assembly transcriptional regulator IscR
PANS_07_4_01845	GO:0003700	F	Fe-S cluster assembly transcriptional regulator IscR
PANS_07_4_01845	GO:0005506	F	Fe-S cluster assembly transcriptional regulator IscR
PANS_07_4_01845	GO:0051537	F	Fe-S cluster assembly transcriptional regulator IscR
PANS_07_4_01845	GO:0006355	P	Fe-S cluster assembly transcriptional regulator IscR
PANS_07_4_01846	GO:0005737	C	IscS subfamily cysteine desulfurase
PANS_07_4_01846	GO:0030170	F	IscS subfamily cysteine desulfurase
PANS_07_4_01846	GO:0031071	F	IscS subfamily cysteine desulfurase
PANS_07_4_01846	GO:0046872	F	IscS subfamily cysteine desulfurase
PANS_07_4_01846	GO:0051537	F	IscS subfamily cysteine desulfurase
PANS_07_4_01846	GO:0044571	P	IscS subfamily cysteine desulfurase
PANS_07_4_01852	GO:0005737	C	nucleoside-diphosphate kinase
PANS_07_4_01852	GO:0004550	F	nucleoside-diphosphate kinase
PANS_07_4_01852	GO:0005524	F	nucleoside-diphosphate kinase
PANS_07_4_01852	GO:0046872	F	nucleoside-diphosphate kinase
PANS_07_4_01852	GO:0006165	P	nucleoside-diphosphate kinase
PANS_07_4_01852	GO:0006183	P	nucleoside-diphosphate kinase
PANS_07_4_01852	GO:0006228	P	nucleoside-diphosphate kinase
PANS_07_4_01852	GO:0006241	P	nucleoside-diphosphate kinase
PANS_07_4_01866	GO:0000166	F	IMP dehydrogenase
PANS_07_4_01866	GO:0003938	F	IMP dehydrogenase
PANS_07_4_01866	GO:0046872	F	IMP dehydrogenase
PANS_07_4_01866	GO:0006177	P	IMP dehydrogenase
PANS_07_4_01867	GO:0003922	F	glutamine-hydrolyzing GMP synthase
PANS_07_4_01867	GO:0005524	F	glutamine-hydrolyzing GMP synthase
PANS_07_4_01867	GO:0008483	F	glutamine-hydrolyzing GMP synthase
PANS_07_4_01867	GO:0016462	F	glutamine-hydrolyzing GMP synthase
PANS_07_4_01867	GO:0006177	P	glutamine-hydrolyzing GMP synthase
PANS_07_4_01867	GO:0006541	P	glutamine-hydrolyzing GMP synthase
PANS_07_4_01899	GO:0004601	F	thioredoxin-dependent thiol peroxidase
PANS_07_4_01899	GO:0051920	F	thioredoxin-dependent thiol peroxidase
PANS_07_4_01899	GO:0098869	P	thioredoxin-dependent thiol peroxidase
PANS_07_4_01900	GO:0016021	C	glycine cleavage system transcriptional repressor
PANS_07_4_01921	GO:0005886	C	ABC transporter permease
PANS_07_4_01921	GO:0016021	C	ABC transporter permease
PANS_07_4_01921	GO:0022857	F	ABC transporter permease
PANS_07_4_01921	GO:0055085	P	ABC transporter permease
PANS_07_4_01945	GO:0008982	F	PTS glucose transporter subunit IIA
PANS_07_4_01945	GO:0103111	F	PTS glucose transporter subunit IIA
PANS_07_4_01945	GO:0009401	P	PTS glucose transporter subunit IIA
PANS_07_4_01945	GO:0034219	P	PTS glucose transporter subunit IIA
PANS_07_4_01947	GO:0005737	C	phosphocarrier protein Hpr
PANS_07_4_01947	GO:0016740	F	phosphocarrier protein Hpr
PANS_07_4_01947	GO:0009401	P	phosphocarrier protein Hpr
PANS_07_4_01958	GO:0016021	C	formate/nitrite transporter family protein
PANS_07_4_01958	GO:0022857	F	formate/nitrite transporter family protein
PANS_07_4_01958	GO:0055085	P	formate/nitrite transporter family protein
PANS_07_4_01966	GO:0005886	C	Nramp family divalent metal transporter
PANS_07_4_01966	GO:0016021	C	Nramp family divalent metal transporter
PANS_07_4_01966	GO:0015293	F	Nramp family divalent metal transporter
PANS_07_4_01966	GO:0046872	F	Nramp family divalent metal transporter
PANS_07_4_01966	GO:0046873	F	Nramp family divalent metal transporter
PANS_07_4_01966	GO:0030001	P	Nramp family divalent metal transporter
PANS_07_4_01966	GO:0055085	P	Nramp family divalent metal transporter
PANS_07_4_01971	GO:0005737	C	glucokinase
PANS_07_4_01971	GO:0016021	C	glucokinase
PANS_07_4_01971	GO:0004340	F	glucokinase
PANS_07_4_01971	GO:0005524	F	glucokinase
PANS_07_4_01971	GO:0005536	F	glucokinase
PANS_07_4_01971	GO:0006096	P	glucokinase
PANS_07_4_01971	GO:0051156	P	glucokinase
PANS_07_4_01992	GO:0005886	C	sugar ABC transporter permease
PANS_07_4_01992	GO:0016021	C	sugar ABC transporter permease
PANS_07_4_01992	GO:0055085	P	sugar ABC transporter permease
PANS_07_4_02084	GO:0016020	C	phospholipid-binding lipoprotein MlaA
PANS_07_4_02087	GO:0005737	C	acetyl-CoA C-acyltransferase FadI
PANS_07_4_02087	GO:0003988	F	acetyl-CoA C-acyltransferase FadI
PANS_07_4_02087	GO:0006635	P	acetyl-CoA C-acyltransferase FadI
PANS_07_4_02090	GO:0016021	C	HAMP domain-containing protein
PANS_07_4_02090	GO:0004888	F	HAMP domain-containing protein
PANS_07_4_02090	GO:0006935	P	HAMP domain-containing protein
PANS_07_4_02090	GO:0007165	P	HAMP domain-containing protein
PANS_07_4_02092	GO:0005840	C	50S ribosomal protein L3 N(5)-glutamine methyltransferase
PANS_07_4_02092	GO:0003676	F	50S ribosomal protein L3 N(5)-glutamine methyltransferase
PANS_07_4_02092	GO:0009007	F	50S ribosomal protein L3 N(5)-glutamine methyltransferase
PANS_07_4_02092	GO:0036009	F	50S ribosomal protein L3 N(5)-glutamine methyltransferase
PANS_07_4_02092	GO:0018364	P	50S ribosomal protein L3 N(5)-glutamine methyltransferase
PANS_07_4_02092	GO:0032775	P	50S ribosomal protein L3 N(5)-glutamine methyltransferase
PANS_07_4_02106	GO:0003677	F	transcriptional regulator TctD
PANS_07_4_02106	GO:0000160	P	transcriptional regulator TctD
PANS_07_4_02106	GO:0006355	P	transcriptional regulator TctD
PANS_07_4_02118	GO:0016829	F	UbiX family flavin prenyltransferase
PANS_07_4_02118	GO:0106141	F	UbiX family flavin prenyltransferase
PANS_07_4_02129	GO:0016817	F	NUDIX hydrolase YfcD
PANS_07_4_02129	GO:0016853	F	NUDIX hydrolase YfcD
PANS_07_4_02129	GO:0046872	F	NUDIX hydrolase YfcD
PANS_07_4_02141	GO:0005737	C	5'-deoxynucleotidase
PANS_07_4_02141	GO:0000166	F	5'-deoxynucleotidase
PANS_07_4_02141	GO:0002953	F	5'-deoxynucleotidase
PANS_07_4_02141	GO:0046872	F	5'-deoxynucleotidase
PANS_07_4_02141	GO:0016311	P	5'-deoxynucleotidase
PANS_07_4_02146	GO:0005886	C	NADH-quinone oxidoreductase subunit B
PANS_07_4_02146	GO:0005506	F	NADH-quinone oxidoreductase subunit B
PANS_07_4_02146	GO:0008137	F	NADH-quinone oxidoreductase subunit B
PANS_07_4_02146	GO:0048038	F	NADH-quinone oxidoreductase subunit B
PANS_07_4_02146	GO:0051539	F	NADH-quinone oxidoreductase subunit B
PANS_07_4_02146	GO:0022900	P	NADH-quinone oxidoreductase subunit B
PANS_07_4_02152	GO:0005886	C	NADH-quinone oxidoreductase subunit NuoI
PANS_07_4_02152	GO:0005506	F	NADH-quinone oxidoreductase subunit NuoI
PANS_07_4_02152	GO:0048038	F	NADH-quinone oxidoreductase subunit NuoI
PANS_07_4_02152	GO:0050136	F	NADH-quinone oxidoreductase subunit NuoI
PANS_07_4_02152	GO:0051539	F	NADH-quinone oxidoreductase subunit NuoI
PANS_07_4_02161	GO:0005886	C	stress response protein ElaB
PANS_07_4_02161	GO:0016021	C	stress response protein ElaB
PANS_07_4_02161	GO:0043022	F	stress response protein ElaB
PANS_07_4_02193	GO:0005737	C	replication initiation negative regulator SeqA
PANS_07_4_02193	GO:0003677	F	replication initiation negative regulator SeqA
PANS_07_4_02193	GO:0006355	P	replication initiation negative regulator SeqA
PANS_07_4_02193	GO:0032297	P	replication initiation negative regulator SeqA
PANS_07_4_02197	GO:0004601	F	carboxymuconolactone decarboxylase family protein
PANS_07_4_02197	GO:0051920	F	carboxymuconolactone decarboxylase family protein
PANS_07_4_02197	GO:0098869	P	carboxymuconolactone decarboxylase family protein
PANS_07_4_02212	GO:0005886	C	succinate dehydrogenase membrane anchor subunit
PANS_07_4_02212	GO:0016021	C	succinate dehydrogenase membrane anchor subunit
PANS_07_4_02212	GO:0000104	F	succinate dehydrogenase membrane anchor subunit
PANS_07_4_02212	GO:0009055	F	succinate dehydrogenase membrane anchor subunit
PANS_07_4_02212	GO:0020037	F	succinate dehydrogenase membrane anchor subunit
PANS_07_4_02212	GO:0046872	F	succinate dehydrogenase membrane anchor subunit
PANS_07_4_02212	GO:0006099	P	succinate dehydrogenase membrane anchor subunit
PANS_07_4_02212	GO:0022900	P	succinate dehydrogenase membrane anchor subunit
PANS_07_4_02213	GO:0005886	C	succinate dehydrogenase flavoprotein subunit
PANS_07_4_02213	GO:0008177	F	succinate dehydrogenase flavoprotein subunit
PANS_07_4_02213	GO:0050660	F	succinate dehydrogenase flavoprotein subunit
PANS_07_4_02213	GO:0006099	P	succinate dehydrogenase flavoprotein subunit
PANS_07_4_02213	GO:0022900	P	succinate dehydrogenase flavoprotein subunit
PANS_07_4_02214	GO:0008177	F	succinate dehydrogenase iron-sulfur subunit
PANS_07_4_02214	GO:0009055	F	succinate dehydrogenase iron-sulfur subunit
PANS_07_4_02214	GO:0046872	F	succinate dehydrogenase iron-sulfur subunit
PANS_07_4_02214	GO:0051537	F	succinate dehydrogenase iron-sulfur subunit
PANS_07_4_02214	GO:0051538	F	succinate dehydrogenase iron-sulfur subunit
PANS_07_4_02214	GO:0051539	F	succinate dehydrogenase iron-sulfur subunit
PANS_07_4_02214	GO:0006099	P	succinate dehydrogenase iron-sulfur subunit
PANS_07_4_02214	GO:0022900	P	succinate dehydrogenase iron-sulfur subunit
PANS_07_4_02222	GO:0016021	C	cyd operon protein YbgE
PANS_07_4_02223	GO:0047617	F	tol-pal system-associated acyl-CoA thioesterase
PANS_07_4_02232	GO:0005737	C	methylated-DNA--[protein]-cysteine S-methyltransferase
PANS_07_4_02232	GO:0003908	F	methylated-DNA--[protein]-cysteine S-methyltransferase
PANS_07_4_02232	GO:0006307	P	methylated-DNA--[protein]-cysteine S-methyltransferase
PANS_07_4_02232	GO:0032259	P	methylated-DNA--[protein]-cysteine S-methyltransferase
PANS_07_4_02252	GO:0016301	F	kinase inhibitor
PANS_07_4_02252	GO:0016310	P	kinase inhibitor
PANS_07_4_02263	GO:0061799	F	cyclic pyranopterin monophosphate synthase MoaC
PANS_07_4_02263	GO:0006777	P	cyclic pyranopterin monophosphate synthase MoaC
PANS_07_4_02264	GO:0061799	F	molybdopterin synthase sulfur carrier subunit
PANS_07_4_02264	GO:0006777	P	molybdopterin synthase sulfur carrier subunit
PANS_07_4_02265	GO:0030366	F	molybdopterin synthase catalytic subunit MoaE
PANS_07_4_02265	GO:0006777	P	molybdopterin synthase catalytic subunit MoaE
PANS_07_4_02272	GO:0016021	C	YbhQ family protein
PANS_07_4_02281	GO:0016021	C	DedA family protein
PANS_07_4_02289	GO:0005737	C	isopentenyl-diphosphate delta-isomerase
PANS_07_4_02289	GO:0004452	F	isopentenyl-diphosphate delta-isomerase
PANS_07_4_02289	GO:0016787	F	isopentenyl-diphosphate delta-isomerase
PANS_07_4_02289	GO:0046872	F	isopentenyl-diphosphate delta-isomerase
PANS_07_4_02289	GO:0008299	P	isopentenyl-diphosphate delta-isomerase
PANS_07_4_02289	GO:0050992	P	isopentenyl-diphosphate delta-isomerase
PANS_07_4_02290	GO:0043190	C	ABC transporter substrate-binding protein
PANS_07_4_02290	GO:0022857	F	ABC transporter substrate-binding protein
PANS_07_4_02290	GO:0055085	P	ABC transporter substrate-binding protein
PANS_07_4_02291	GO:0005886	C	ABC transporter permease
PANS_07_4_02291	GO:0016021	C	ABC transporter permease
PANS_07_4_02291	GO:0055085	P	ABC transporter permease
PANS_07_4_02297	GO:0005840	C	GNAT family N-acetyltransferase
PANS_07_4_02297	GO:0008080	F	GNAT family N-acetyltransferase
PANS_07_4_02310	GO:0005737	C	23S rRNA (adenine(1618)-N(6))-methyltransferase RlmF
PANS_07_4_02310	GO:0003676	F	23S rRNA (adenine(1618)-N(6))-methyltransferase RlmF
PANS_07_4_02310	GO:0052907	F	23S rRNA (adenine(1618)-N(6))-methyltransferase RlmF
PANS_07_4_02310	GO:0031167	P	23S rRNA (adenine(1618)-N(6))-methyltransferase RlmF
PANS_07_4_02318	GO:0003677	F	manganese-binding transcriptional regulator MntR
PANS_07_4_02318	GO:0003700	F	manganese-binding transcriptional regulator MntR
PANS_07_4_02318	GO:0046914	F	manganese-binding transcriptional regulator MntR
PANS_07_4_02318	GO:0046983	F	manganese-binding transcriptional regulator MntR
PANS_07_4_02318	GO:0006355	P	manganese-binding transcriptional regulator MntR
PANS_07_4_02320	GO:0016021	C	HlyD family secretion protein
PANS_07_4_02320	GO:0055085	P	HlyD family secretion protein
PANS_07_4_02346	GO:0042597	C	spermidine/putrescine ABC transporter substrate-binding protein PotF
PANS_07_4_02346	GO:0019808	F	spermidine/putrescine ABC transporter substrate-binding protein PotF
PANS_07_4_02346	GO:0015846	P	spermidine/putrescine ABC transporter substrate-binding protein PotF
PANS_07_4_02348	GO:0005886	C	putrescine ABC transporter permease PotH
PANS_07_4_02348	GO:0016021	C	putrescine ABC transporter permease PotH
PANS_07_4_02348	GO:0055085	P	putrescine ABC transporter permease PotH
PANS_07_4_02349	GO:0005886	C	putrescine ABC transporter permease PotI
PANS_07_4_02349	GO:0016021	C	putrescine ABC transporter permease PotI
PANS_07_4_02349	GO:0055085	P	putrescine ABC transporter permease PotI
PANS_07_4_02356	GO:0016020	C	arginine ABC transporter ATP-binding protein ArtP
PANS_07_4_02356	GO:0005524	F	arginine ABC transporter ATP-binding protein ArtP
PANS_07_4_02356	GO:0015424	F	arginine ABC transporter ATP-binding protein ArtP
PANS_07_4_02356	GO:0042626	F	arginine ABC transporter ATP-binding protein ArtP
PANS_07_4_02356	GO:0003333	P	arginine ABC transporter ATP-binding protein ArtP
PANS_07_4_02359	GO:0008745	F	N-acetylmuramoyl-L-alanine amidase
PANS_07_4_02359	GO:0009253	P	N-acetylmuramoyl-L-alanine amidase
PANS_07_4_02364	GO:0005737	C	Cold shock-like protein CspD
PANS_07_4_02364	GO:0003677	F	Cold shock-like protein CspD
PANS_07_4_02364	GO:0006355	P	Cold shock-like protein CspD
PANS_07_4_02365	GO:0008233	F	ATP-dependent Clp protease adapter ClpS
PANS_07_4_02365	GO:0006508	P	ATP-dependent Clp protease adapter ClpS
PANS_07_4_02365	GO:0030163	P	ATP-dependent Clp protease adapter ClpS
PANS_07_4_02367	GO:0005829	C	translation initiation factor IF-1
PANS_07_4_02367	GO:0003743	F	translation initiation factor IF-1
PANS_07_4_02367	GO:0005515	F	translation initiation factor IF-1
PANS_07_4_02367	GO:0016787	F	translation initiation factor IF-1
PANS_07_4_02367	GO:0019843	F	translation initiation factor IF-1
PANS_07_4_02367	GO:0043022	F	translation initiation factor IF-1
PANS_07_4_02367	GO:0006413	P	translation initiation factor IF-1
PANS_07_4_02372	GO:0043565	F	leucine-responsive transcriptional regulator Lrp
PANS_07_4_02374	GO:0042597	C	outer membrane lipoprotein chaperone LolA
PANS_07_4_02374	GO:0042953	P	outer membrane lipoprotein chaperone LolA
PANS_07_4_02374	GO:0044874	P	outer membrane lipoprotein chaperone LolA
PANS_07_4_02380	GO:0016021	C	formate transporter FocA
PANS_07_4_02380	GO:0015499	F	formate transporter FocA
PANS_07_4_02380	GO:0015724	P	formate transporter FocA
PANS_07_4_02380	GO:0055085	P	formate transporter FocA
PANS_07_4_02385	GO:0005840	C	30S ribosomal protein S1
PANS_07_4_02385	GO:0003723	F	30S ribosomal protein S1
PANS_07_4_02385	GO:0003735	F	30S ribosomal protein S1
PANS_07_4_02385	GO:0006412	P	30S ribosomal protein S1
PANS_07_4_02386	GO:0005694	C	integration host factor subunit beta
PANS_07_4_02386	GO:0003677	F	integration host factor subunit beta
PANS_07_4_02386	GO:0006310	P	integration host factor subunit beta
PANS_07_4_02386	GO:0006355	P	integration host factor subunit beta
PANS_07_4_02386	GO:0006417	P	integration host factor subunit beta
PANS_07_4_02419	GO:0016021	C	paraquat-inducible protein B
PANS_07_4_02421	GO:0005737	C	bifunctional 3-hydroxydecanoyl-ACP dehydratase/trans-2-decenoyl-ACP isomerase
PANS_07_4_02421	GO:0004317	F	bifunctional 3-hydroxydecanoyl-ACP dehydratase/trans-2-decenoyl-ACP isomerase
PANS_07_4_02421	GO:0008659	F	bifunctional 3-hydroxydecanoyl-ACP dehydratase/trans-2-decenoyl-ACP isomerase
PANS_07_4_02421	GO:0008693	F	bifunctional 3-hydroxydecanoyl-ACP dehydratase/trans-2-decenoyl-ACP isomerase
PANS_07_4_02421	GO:0034017	F	bifunctional 3-hydroxydecanoyl-ACP dehydratase/trans-2-decenoyl-ACP isomerase
PANS_07_4_02421	GO:0047451	F	bifunctional 3-hydroxydecanoyl-ACP dehydratase/trans-2-decenoyl-ACP isomerase
PANS_07_4_02421	GO:0006633	P	bifunctional 3-hydroxydecanoyl-ACP dehydratase/trans-2-decenoyl-ACP isomerase
PANS_07_4_02448	GO:0061579	F	autoinducer synthase
PANS_07_4_02448	GO:0009372	P	autoinducer synthase
PANS_07_4_03011	GO:0016021	C	hypothetical protein HA47_06970
PANS_07_4_03029	GO:0030288	C	molecular chaperone
PANS_07_4_03029	GO:0061077	P	molecular chaperone
PANS_07_4_03029	GO:0071555	P	molecular chaperone
PANS_07_4_03032	GO:0016021	C	hypothetical protein C7433_1011276
PANS_07_4_03034	GO:0009289	C	fimbrial protein
PANS_07_4_03034	GO:0007155	P	fimbrial protein
PANS_07_4_03061	GO:0005737	C	cold-shock protein
PANS_07_4_03061	GO:0016021	C	cold-shock protein
PANS_07_4_03061	GO:0003677	F	cold-shock protein
PANS_07_4_03068	GO:0009002	F	D-alanyl-D-alanine carboxypeptidase (penicillin-binding protein 5/6)
PANS_07_4_03068	GO:0006508	P	D-alanyl-D-alanine carboxypeptidase (penicillin-binding protein 5/6)
PANS_07_4_03068	GO:0008360	P	D-alanyl-D-alanine carboxypeptidase (penicillin-binding protein 5/6)
PANS_07_4_03068	GO:0009252	P	D-alanyl-D-alanine carboxypeptidase (penicillin-binding protein 5/6)
PANS_07_4_03068	GO:0071555	P	D-alanyl-D-alanine carboxypeptidase (penicillin-binding protein 5/6)
PANS_07_4_03072	GO:0005737	C	23S rRNA (pseudouridine(1915)-N(3))-methyltransferase RlmH
PANS_07_4_03072	GO:0070038	F	23S rRNA (pseudouridine(1915)-N(3))-methyltransferase RlmH
PANS_07_4_03072	GO:0031167	P	23S rRNA (pseudouridine(1915)-N(3))-methyltransferase RlmH
PANS_07_4_03073	GO:0005737	C	ribosome silencing factor
PANS_07_4_03073	GO:0017148	P	ribosome silencing factor
PANS_07_4_03073	GO:0042256	P	ribosome silencing factor
PANS_07_4_03073	GO:0090071	P	ribosome silencing factor
PANS_07_4_03079	GO:0016020	C	amino acid ABC transporter ATP-binding protein
PANS_07_4_03079	GO:0005524	F	amino acid ABC transporter ATP-binding protein
PANS_07_4_03079	GO:0015424	F	amino acid ABC transporter ATP-binding protein
PANS_07_4_03079	GO:0042626	F	amino acid ABC transporter ATP-binding protein
PANS_07_4_03079	GO:0003333	P	amino acid ABC transporter ATP-binding protein
PANS_07_4_03080	GO:0043190	C	glutamate/aspartate ABC transporter permease GltK
PANS_07_4_03080	GO:0022857	F	glutamate/aspartate ABC transporter permease GltK
PANS_07_4_03080	GO:0006865	P	glutamate/aspartate ABC transporter permease GltK
PANS_07_4_03080	GO:0055085	P	glutamate/aspartate ABC transporter permease GltK
PANS_07_4_03092	GO:0016757	F	mannosyltransferase
PANS_07_4_03193	GO:0008777	F	M20 family metallopeptidase
PANS_07_4_03195	GO:0043190	C	LPS export ABC transporter permease LptG
PANS_07_4_03195	GO:0055085	P	LPS export ABC transporter permease LptG
PANS_07_4_03196	GO:0043190	C	LPS export ABC transporter permease LptF
PANS_07_4_03196	GO:0055085	P	LPS export ABC transporter permease LptF
PANS_07_4_03203	GO:0005737	C	ribonuclease E inhibitor RraB
PANS_07_4_03203	GO:0019899	F	ribonuclease E inhibitor RraB
PANS_07_4_03203	GO:0060698	F	ribonuclease E inhibitor RraB
PANS_07_4_03203	GO:0060702	P	ribonuclease E inhibitor RraB
PANS_07_4_03222	GO:0006744	P	SCP2 sterol-binding domain-containing protein
PANS_07_4_03229	GO:0005840	C	30S ribosomal protein S15
PANS_07_4_03229	GO:0003735	F	30S ribosomal protein S15
PANS_07_4_03229	GO:0019843	F	30S ribosomal protein S15
PANS_07_4_03229	GO:0006412	P	30S ribosomal protein S15
PANS_07_4_03230	GO:0003723	F	tRNA pseudouridine(55) synthase TruB
PANS_07_4_03230	GO:0016829	F	tRNA pseudouridine(55) synthase TruB
PANS_07_4_03230	GO:0106029	F	tRNA pseudouridine(55) synthase TruB
PANS_07_4_03230	GO:0031119	P	tRNA pseudouridine(55) synthase TruB
PANS_07_4_03231	GO:0005737	C	ribosome-binding factor A
PANS_07_4_03231	GO:0030490	P	ribosome-binding factor A
PANS_07_4_03234	GO:0005737	C	ribosome maturation factor RimP
PANS_07_4_03234	GO:0042274	P	ribosome maturation factor RimP
PANS_07_4_03235	GO:0005886	C	preprotein translocase subunit SecG
PANS_07_4_03235	GO:0016021	C	preprotein translocase subunit SecG
PANS_07_4_03235	GO:0015450	F	preprotein translocase subunit SecG
PANS_07_4_03235	GO:0009306	P	preprotein translocase subunit SecG
PANS_07_4_03235	GO:0071806	P	preprotein translocase subunit SecG
PANS_07_4_03236	GO:0000287	F	phosphoglucosamine mutase
PANS_07_4_03236	GO:0008966	F	phosphoglucosamine mutase
PANS_07_4_03236	GO:0005975	P	phosphoglucosamine mutase
PANS_07_4_03243	GO:0005737	C	Obg family GTPase CgtA
PANS_07_4_03243	GO:0000287	F	Obg family GTPase CgtA
PANS_07_4_03243	GO:0003924	F	Obg family GTPase CgtA
PANS_07_4_03243	GO:0005525	F	Obg family GTPase CgtA
PANS_07_4_03243	GO:0042254	P	Obg family GTPase CgtA
PANS_07_4_03245	GO:0005840	C	50S ribosomal protein L21
PANS_07_4_03245	GO:0003735	F	50S ribosomal protein L21
PANS_07_4_03245	GO:0019843	F	50S ribosomal protein L21
PANS_07_4_03245	GO:0006412	P	50S ribosomal protein L21
PANS_07_4_03247	GO:0003677	F	helix-turn-helix domain-containing protein
PANS_07_4_03254	GO:0005524	F	phospholipid ABC transporter ATP-binding protein MlaF
PANS_07_4_03254	GO:0042626	F	phospholipid ABC transporter ATP-binding protein MlaF
PANS_07_4_03254	GO:0055085	P	phospholipid ABC transporter ATP-binding protein MlaF
PANS_07_4_03255	GO:0016021	C	calcium/sodium antiporter
PANS_07_4_03255	GO:0055085	P	calcium/sodium antiporter
PANS_07_4_03257	GO:0019143	F	3-deoxy-manno-octulosonate-8-phosphatase KdsC
PANS_07_4_03257	GO:0046872	F	3-deoxy-manno-octulosonate-8-phosphatase KdsC
PANS_07_4_03257	GO:0009103	P	3-deoxy-manno-octulosonate-8-phosphatase KdsC
PANS_07_4_03257	GO:0016311	P	3-deoxy-manno-octulosonate-8-phosphatase KdsC
PANS_07_4_03258	GO:0005887	C	LPS export ABC transporter periplasmic protein LptC
PANS_07_4_03258	GO:0015221	F	LPS export ABC transporter periplasmic protein LptC
PANS_07_4_03258	GO:0015920	P	LPS export ABC transporter periplasmic protein LptC
PANS_07_4_03258	GO:0043165	P	LPS export ABC transporter periplasmic protein LptC
PANS_07_4_03259	GO:0042597	C	lipopolysaccharide ABC transporter substrate-binding protein LptA
PANS_07_4_03259	GO:0001530	F	lipopolysaccharide ABC transporter substrate-binding protein LptA
PANS_07_4_03259	GO:0015920	P	lipopolysaccharide ABC transporter substrate-binding protein LptA
PANS_07_4_03259	GO:0043165	P	lipopolysaccharide ABC transporter substrate-binding protein LptA
PANS_07_4_03260	GO:0005737	C	LPS export ABC transporter ATP-binding protein
PANS_07_4_03260	GO:0043190	C	LPS export ABC transporter ATP-binding protein
PANS_07_4_03260	GO:0005524	F	LPS export ABC transporter ATP-binding protein
PANS_07_4_03260	GO:0042626	F	LPS export ABC transporter ATP-binding protein
PANS_07_4_03260	GO:0055085	P	LPS export ABC transporter ATP-binding protein
PANS_07_4_03262	GO:0006417	P	ribosome hibernation promoting factor
PANS_07_4_03265	GO:0016740	F	PTS phosphocarrier protein NPr
PANS_07_4_03271	GO:0006749	P	stringent starvation protein A
PANS_07_4_03273	GO:0005840	C	50S ribosomal protein L13
PANS_07_4_03273	GO:0003735	F	50S ribosomal protein L13
PANS_07_4_03273	GO:0006412	P	50S ribosomal protein L13
PANS_07_4_03282	GO:0005737	C	elongation factor P
PANS_07_4_03282	GO:0003746	F	elongation factor P
PANS_07_4_03282	GO:0006414	P	elongation factor P
PANS_07_4_03286	GO:0005737	C	co-chaperone GroES
PANS_07_4_03286	GO:0005524	F	co-chaperone GroES
PANS_07_4_03286	GO:0006457	P	co-chaperone GroES
PANS_07_4_03287	GO:0016021	C	FxsA family protein
PANS_07_4_03399	GO:0009279	C	carbohydrate porin
PANS_07_4_03399	GO:0046930	C	carbohydrate porin
PANS_07_4_03399	GO:0015288	F	carbohydrate porin
PANS_07_4_03399	GO:0008643	P	carbohydrate porin
PANS_07_4_03399	GO:0055085	P	carbohydrate porin
PANS_07_4_03408	GO:0005737	C	3-dehydro-L-gulonate 2-dehydrogenase
PANS_07_4_03408	GO:0047559	F	3-dehydro-L-gulonate 2-dehydrogenase
PANS_07_4_03408	GO:0070403	F	3-dehydro-L-gulonate 2-dehydrogenase
PANS_07_4_03418	GO:0004497	F	NADPH-dependent L-lysine N(6)-monooxygenase
PANS_07_4_03475	GO:0005886	C	CidA/LrgA family protein
PANS_07_4_03475	GO:0016021	C	CidA/LrgA family protein
PANS_07_4_03480	GO:0003677	F	redox-sensitive transcriptional activator SoxR
PANS_07_4_03480	GO:0051537	F	redox-sensitive transcriptional activator SoxR
PANS_07_4_03480	GO:0006355	P	redox-sensitive transcriptional activator SoxR
PANS_07_4_03480	GO:0006979	P	redox-sensitive transcriptional activator SoxR
PANS_07_4_03483	GO:0016740	F	teichuronopeptide biosynthesis TupA-like protein
PANS_07_4_03491	GO:0003697	F	single-stranded DNA-binding protein SSB1
PANS_07_4_03491	GO:0006260	P	single-stranded DNA-binding protein SSB1
PANS_07_4_03491	GO:0006281	P	single-stranded DNA-binding protein SSB1
PANS_07_4_03491	GO:0006310	P	single-stranded DNA-binding protein SSB1
PANS_07_4_03499	GO:1990077	C	replicative DNA helicase
PANS_07_4_03499	GO:0003677	F	replicative DNA helicase
PANS_07_4_03499	GO:0003678	F	replicative DNA helicase
PANS_07_4_03499	GO:0005524	F	replicative DNA helicase
PANS_07_4_03499	GO:0006269	P	replicative DNA helicase
PANS_07_4_03499	GO:0032508	P	replicative DNA helicase
PANS_07_4_03508	GO:0005886	C	diacylglycerol kinase
PANS_07_4_03508	GO:0016021	C	diacylglycerol kinase
PANS_07_4_03508	GO:0004143	F	diacylglycerol kinase
PANS_07_4_03508	GO:0005524	F	diacylglycerol kinase
PANS_07_4_03508	GO:0046872	F	diacylglycerol kinase
PANS_07_4_03508	GO:0006654	P	diacylglycerol kinase
PANS_07_4_03508	GO:0016310	P	diacylglycerol kinase
PANS_07_6_00474	GO:0004252	F	carboxy terminal-processing peptidase
PANS_07_6_00474	GO:0006508	P	carboxy terminal-processing peptidase
PANS_07_6_03403	GO:0003677	F	FadR family transcriptional regulator
PANS_07_6_03403	GO:0003700	F	FadR family transcriptional regulator
PANS_07_6_03403	GO:0006355	P	FadR family transcriptional regulator
PANS_99_15_00020	GO:0005737	C	RNA polymerase sigma factor FliA
PANS_99_15_00020	GO:0003677	F	RNA polymerase sigma factor FliA
PANS_99_15_00020	GO:0003899	F	RNA polymerase sigma factor FliA
PANS_99_15_00020	GO:0016987	F	RNA polymerase sigma factor FliA
PANS_99_15_00020	GO:0001123	P	RNA polymerase sigma factor FliA
PANS_99_15_00020	GO:2000142	P	RNA polymerase sigma factor FliA
PANS_99_15_00029	GO:0005886	C	sodium/proline symporter PutP
PANS_99_15_00029	GO:0016021	C	sodium/proline symporter PutP
PANS_99_15_00029	GO:0005298	F	sodium/proline symporter PutP
PANS_99_15_00029	GO:0031402	F	sodium/proline symporter PutP
PANS_99_15_00029	GO:0006814	P	sodium/proline symporter PutP
PANS_99_15_00029	GO:0015824	P	sodium/proline symporter PutP
PANS_99_15_00029	GO:1903825	P	sodium/proline symporter PutP
PANS_99_15_00638	GO:0016787	F	hexitol phosphatase HxpB
PANS_99_15_00638	GO:0046872	F	hexitol phosphatase HxpB
PANS_99_15_00737	GO:0016021	C	MCP four helix bundle domain-containing protein
PANS_99_15_00737	GO:0004888	F	MCP four helix bundle domain-containing protein
PANS_99_15_00737	GO:0006935	P	MCP four helix bundle domain-containing protein
PANS_99_15_00737	GO:0007165	P	MCP four helix bundle domain-containing protein
PANS_99_15_00739	GO:0016021	C	diguanylate cyclase
PANS_99_15_00758	GO:0016787	F	epoxide hydrolase
PANS_99_15_00770	GO:0005886	C	cytochrome ubiquinol oxidase subunit I
PANS_99_15_00770	GO:0016021	C	cytochrome ubiquinol oxidase subunit I
PANS_99_15_00770	GO:0070069	C	cytochrome ubiquinol oxidase subunit I
PANS_99_15_00770	GO:0009055	F	cytochrome ubiquinol oxidase subunit I
PANS_99_15_00770	GO:0046872	F	cytochrome ubiquinol oxidase subunit I
PANS_99_15_00770	GO:0019646	P	cytochrome ubiquinol oxidase subunit I
PANS_99_15_01514	GO:0004030	F	succinate-semialdehyde dehydrogenase
PANS_99_15_01514	GO:0004777	F	succinate-semialdehyde dehydrogenase
PANS_99_15_03212	GO:0008080	F	GNAT family N-acetyltransferase
PANS_99_15_03218	GO:0016787	F	2-iminobutanoate/2-iminopropanoate deaminase
PANS_99_15_04153	GO:0016491	F	SDR family oxidoreductase
PNA_03_3_00130	GO:0009279	C	peptidoglycan-associated lipoprotein Pal
PNA_03_3_00130	GO:0016021	C	peptidoglycan-associated lipoprotein Pal
PNA_03_3_00130	GO:0007049	P	peptidoglycan-associated lipoprotein Pal
PNA_03_3_00130	GO:0051301	P	peptidoglycan-associated lipoprotein Pal
PNA_03_3_00948	GO:0016757	F	glycosyl transferase
PNA_03_3_03113	GO:0005886	C	YitT family protein
PNA_03_3_03113	GO:0016021	C	YitT family protein
PNA_03_3_03125	GO:0005886	C	polysaccharide biosynthesis protein
PNA_03_3_03125	GO:0016021	C	polysaccharide biosynthesis protein
PNA_14_11_00061	GO:0043190	C	ABC transporter substrate-binding protein
PNA_14_11_00061	GO:0022857	F	ABC transporter substrate-binding protein
PNA_14_11_00061	GO:0055085	P	ABC transporter substrate-binding protein
PNA_14_11_00089	GO:0003677	F	manganese-binding transcriptional regulator MntR
PNA_14_11_00089	GO:0003700	F	manganese-binding transcriptional regulator MntR
PNA_14_11_00089	GO:0046914	F	manganese-binding transcriptional regulator MntR
PNA_14_11_00089	GO:0046983	F	manganese-binding transcriptional regulator MntR
PNA_14_11_00089	GO:0006355	P	manganese-binding transcriptional regulator MntR
PNA_14_11_00165	GO:0097697	F	tRNA uridine 5-oxyacetic acid(34) methyltransferase CmoM
PNA_14_11_00165	GO:0030488	P	tRNA uridine 5-oxyacetic acid(34) methyltransferase CmoM
PNA_14_11_01866	GO:0005737	C	flagellar assembly protein FliH
PNA_14_11_01866	GO:0009288	C	flagellar assembly protein FliH
PNA_14_11_01866	GO:0003774	F	flagellar assembly protein FliH
PNA_14_11_01866	GO:0044781	P	flagellar assembly protein FliH
PNA_14_11_01866	GO:0071973	P	flagellar assembly protein FliH
PNA_14_11_01908	GO:0019159	F	nicotinamide-nucleotide amidase
PNA_14_11_01927	GO:0004851	F	uroporphyrinogen-III C-methyltransferase
PNA_14_11_01927	GO:0043115	F	uroporphyrinogen-III C-methyltransferase
PNA_14_11_01927	GO:0051266	F	uroporphyrinogen-III C-methyltransferase
PNA_14_11_01927	GO:0051287	F	uroporphyrinogen-III C-methyltransferase
PNA_14_11_01927	GO:0009236	P	uroporphyrinogen-III C-methyltransferase
PNA_14_11_01927	GO:0019354	P	uroporphyrinogen-III C-methyltransferase
PNA_14_11_01927	GO:0032259	P	uroporphyrinogen-III C-methyltransferase
PNA_14_11_03131	GO:0008080	F	GNAT family N-acetyltransferase
PNA_14_11_03132	GO:0005737	C	citrate synthase
PNA_14_11_03132	GO:0004108	F	citrate synthase
PNA_14_11_03132	GO:0006099	P	citrate synthase
PNA_14_11_03291	GO:0003723	F	RNase adapter RapZ
PNA_14_11_03291	GO:0005524	F	RNase adapter RapZ
PNA_14_11_03291	GO:0005525	F	RNase adapter RapZ
PNA_14_11_03292	GO:0016740	F	PTS phosphocarrier protein NPr
PNA_15_2_01642	GO:0005887	C	cell division protein DedD
PNA_15_2_01642	GO:0030428	C	cell division protein DedD
PNA_15_2_01642	GO:0042834	F	cell division protein DedD
PNA_15_2_01642	GO:0032506	P	cell division protein DedD
PNA_15_2_01945	GO:0005886	C	HAMP domain-containing histidine kinase
PNA_15_2_01945	GO:0016021	C	HAMP domain-containing histidine kinase
PNA_15_2_01945	GO:0000155	F	HAMP domain-containing histidine kinase
PNA_15_2_01945	GO:0000160	P	HAMP domain-containing histidine kinase
PNA_15_2_01945	GO:0018106	P	HAMP domain-containing histidine kinase
PNA_15_2_02119	GO:0005886	C	sugar ABC transporter ATP-binding protein
PNA_15_2_02119	GO:0005524	F	sugar ABC transporter ATP-binding protein
PNA_15_2_02119	GO:0015611	F	sugar ABC transporter ATP-binding protein
PNA_15_2_02119	GO:0043211	F	sugar ABC transporter ATP-binding protein
PNA_15_2_02119	GO:0015752	P	sugar ABC transporter ATP-binding protein
PNA_15_2_02455	GO:0004222	F	M48 family metallopeptidase
PNA_15_2_02455	GO:0046872	F	M48 family metallopeptidase
PNA_15_2_02455	GO:0006508	P	M48 family metallopeptidase
PNA_15_2_02512	GO:0016020	C	PAS domain-containing methyl-accepting chemotaxis protein
PNA_15_2_02512	GO:0007165	P	PAS domain-containing methyl-accepting chemotaxis protein

## Sheet: S5
Table S5: KEGG pathways where the genes featuring in horizontal gene transfer (HGT) are involved
Pathway	Pathway ID	#Enzs in Pathway	Enzyme	#Seqs of Enzyme	Seqs
Purine metabolism	map00230	11	ec:3.6.1.15 - phosphatase, ec:2.7.4.6 - kinase, ec:1.1.1.205 - dehydrogenase, ec:3.6.1.13 - diphosphatase, ec:1.7.3.3 - urate hydroxylase, ec:6.3.5.2 - synthase (glutamine-hydrolysing), ec:3.1.3.5 - uridine 5'-nucleotidase, ec:3.6.1.11 - metaphosphatase, ec:2.4.2.1 - phosphorylase, ec:3.1.3.6 - 3'-mononucleotidase, ec:3.5.4.4 - deaminase	26, 2, 2, 2, 2, 2, 2, 2, 2, 2, 2	PNA_03_3_03376, PANS_99_15_03254, PANS_07_4_03260, NCPPB2275_03801, NCPPB2275_00598, NCPPB2275_02755, PANS_07_4_01817, PANS_07_4_02356, NCPPB2275_02780, PANS_07_4_03243, PANS_07_4_00133, PANS_07_14_00798, PANS_99_15_00796, PNA_15_2_02119, PNA_03_3_00258, NCPPB2281_02937, PANS_07_4_00168, PNA_03_3_01906, PANS_07_10_02665, PANS_07_14_01291, PNA_14_11_01866, PNA_03_3_03370, PANS_07_4_03079, PANS_07_…
Fatty acid biosynthesis	map00061	6	ec:2.3.1.85 - synthase system, ec:5.3.3.14 - protein] isomerase, ec:2.3.1.41 - synthase I, ec:1.1.1.100 - reductase, ec:4.2.1.59 - dehydratase, ec:2.3.1.180 - synthase III	7, 3, 2, 2, 3, 2	PANS_07_4_01126, NCPPB2281_00192, PNA_03_3_00323, NCPPB2275_00257, NCPPB2275_00259, PANS_07_10_00939, PANS_07_4_02421, PNA_03_3_00323, PANS_07_4_02421, NCPPB2281_00192, PANS_07_10_00939, NCPPB2275_00259, NCPPB2275_00257, PANS_07_4_01126, PNA_03_3_00323, PANS_07_4_02421, NCPPB2281_00192, PANS_07_10_00939, NCPPB2275_00259
Pyrimidine metabolism	map00240	5	ec:2.7.4.6 - kinase, ec:3.1.3.5 - uridine 5'-nucleotidase, ec:3.5.2.3 - carbamoylaspartic dehydrase, ec:2.4.2.1 - phosphorylase, ec:3.1.3.6 - 3'-mononucleotidase	2, 2, 2, 2, 2	PNA_03_3_01867, PANS_07_4_01852, PANS_07_4_01693, NCPPB2275_03059, NCPPB2275_00286, PANS_07_4_01155, NCPPB2275_03731, PANS_07_10_02735, PANS_07_4_01693, NCPPB2275_03059
Nicotinate and nicotinamide metabolism	map00760	5	ec:3.1.3.5 - uridine 5'-nucleotidase, ec:1.2.1.24 - dehydrogenase (NAD+), ec:3.5.1.42 - amidase, ec:2.4.2.1 - phosphorylase, ec:1.2.1.16 - dehydrogenase [NAD(P)+]	2, 2, 2, 2, 2	PANS_07_4_01693, NCPPB2275_03059, PANS_07_4_02439, PANS_99_15_01514, NCPPB2275_03069, PNA_14_11_01908, NCPPB2275_03731, PANS_07_10_02735, PANS_07_4_02439, PANS_99_15_01514
Pyruvate metabolism	map00620	4	ec:1.1.1.38 - dehydrogenase (oxaloacetate-decarboxylating), ec:1.1.1.39 - dehydrogenase (decarboxylating), ec:4.1.1.112 - decarboxylase, ec:1.1.1.40 - dehydrogenase (oxaloacetate-decarboxylating) (NADP+)	2, 2, 2, 2	PANS_07_4_00002, PNA_03_3_01542, PANS_07_4_00002, PNA_03_3_01542, PANS_07_4_00002, PNA_03_3_01542, PANS_07_4_00002, PNA_03_3_01542
Drug metabolism - other enzymes	map00983	4	ec:2.7.4.6 - kinase, ec:1.1.1.205 - dehydrogenase, ec:6.3.5.2 - synthase (glutamine-hydrolysing), ec:3.1.1.1 - ali-esterase	2, 2, 2, 4	PNA_03_3_01867, PANS_07_4_01852, PNA_03_3_01853, PANS_07_4_01866, PNA_03_3_01852, PANS_07_4_01867, NCPPB2275_00096, PNA_15_2_02192, PANS_07_10_01136, PANS_07_4_00065
Porphyrin and chlorophyll metabolism	map00860	4	ec:4.99.1.1 - ferrochelatase, ec:1.3.1.76 - dehydrogenase, ec:4.99.1.4 - ferrochelatase, ec:2.1.1.107 - C-methyltransferase	2, 2, 2, 2	PNA_14_11_01927, NCPPB2275_03050, PNA_14_11_01927, NCPPB2275_03050, PNA_14_11_01927, NCPPB2275_03050, PNA_14_11_01927, NCPPB2275_03050
Streptomycin biosynthesis	map00521	4	ec:5.1.3.13 - 3,5-epimerase, ec:2.7.1.2 - glucokinase (phosphorylating), ec:3.1.3.25 - phosphatase, ec:2.7.1.1 - hexokinase type IV glucokinase	2, 2, 2, 2	NCPPB2275_02660, PANS_07_4_00050, PNA_03_3_01747, PANS_07_4_01971, PANS_07_4_01843, PNA_03_3_01876, PNA_03_3_01747, PANS_07_4_01971
Glycolysis / Gluconeogenesis	map00010	3	ec:2.7.1.2 - glucokinase (phosphorylating), ec:2.7.1.1 - hexokinase type IV glucokinase, ec:1.2.1.5 - dehydrogenase [NAD(P)+]	2, 2, 2	PNA_03_3_01747, PANS_07_4_01971, PNA_03_3_01747, PANS_07_4_01971, PANS_07_4_02439, PANS_99_15_01514
Galactose metabolism	map00052	3	ec:4.1.2.40 - aldolase, ec:2.7.1.2 - glucokinase (phosphorylating), ec:2.7.1.1 - hexokinase type IV glucokinase	2, 2, 2	NCPPB2275_03797, PANS_07_10_02669, PNA_03_3_01747, PANS_07_4_01971, PNA_03_3_01747, PANS_07_4_01971
Amino sugar and nucleotide sugar metabolism	map00520	3	ec:2.7.1.2 - glucokinase (phosphorylating), ec:5.4.2.10 - mutase, ec:2.7.1.1 - hexokinase type IV glucokinase	2, 2, 2	PNA_03_3_01747, PANS_07_4_01971, NCPPB2275_01021, PANS_07_4_03236, PNA_03_3_01747, PANS_07_4_01971
Folate biosynthesis	map00790	3	ec:4.6.1.17 - pyranopterin monophosphate synthase, ec:4.1.2.50 - synthase, ec:2.8.1.12 - synthase	4, 2, 2	PANS_07_4_02263, PNA_03_3_00165, PNA_03_3_00166, PANS_07_4_02264, PANS_07_10_02894, NCPPB2275_03036, PANS_07_4_02265, PNA_03_3_00167
Arginine and proline metabolism	map00330	3	ec:3.5.1.4 - acylamidase, ec:4.1.1.19 - decarboxylase, ec:2.3.1.57 - N-acetyltransferase	2, 2, 2	NCPPB2275_00268, PANS_07_4_01137, NCPPB2275_02946, PANS_07_4_01580, PANS_07_12_00720, PANS_07_4_01753
Biotin metabolism	map00780	3	ec:2.3.1.41 - synthase I, ec:1.1.1.100 - reductase, ec:4.2.1.59 - dehydratase	2, 2, 3	PANS_07_10_00939, NCPPB2275_00259, NCPPB2275_00257, PANS_07_4_01126, PNA_03_3_00323, PANS_07_4_02421, NCPPB2281_00192
Butanoate metabolism	map00650	3	ec:1.3.5.1 - dehydrogenase, ec:1.2.1.24 - dehydrogenase (NAD+), ec:1.2.1.16 - dehydrogenase [NAD(P)+]	4, 2, 2	PANS_07_4_02214, PNA_03_3_00115, PANS_07_4_02213, PNA_03_3_00116, PANS_07_4_02439, PANS_99_15_01514, PANS_07_4_02439, PANS_99_15_01514
Citrate cycle (TCA cycle)	map00020	3	ec:1.3.5.1 - dehydrogenase, ec:2.3.1.61 - succinyltransferase, ec:2.3.3.1 - (Si)-synthase	4, 2, 2	PANS_07_4_02214, PNA_03_3_00115, PANS_07_4_02213, PNA_03_3_00116, NCPPB2275_00553, PANS_07_10_01389, PNA_14_11_03132, PNA_03_3_00112
Tryptophan metabolism	map00380	2	ec:3.5.1.4 - acylamidase, ec:2.3.1.61 - succinyltransferase	2, 2	NCPPB2275_00268, PANS_07_4_01137, NCPPB2275_00553, PANS_07_10_01389
Neomycin, kanamycin and gentamicin biosynthesis	map00524	2	ec:2.7.1.2 - glucokinase (phosphorylating), ec:2.7.1.1 - hexokinase type IV glucokinase	2, 2	PNA_03_3_01747, PANS_07_4_01971, PNA_03_3_01747, PANS_07_4_01971
Phenylalanine metabolism	map00360	2	ec:3.5.1.4 - acylamidase, ec:1.2.1.5 - dehydrogenase [NAD(P)+]	2, 2	NCPPB2275_00268, PANS_07_4_01137, PANS_07_4_02439, PANS_99_15_01514
Tyrosine metabolism	map00350	2	ec:1.2.1.5 - dehydrogenase [NAD(P)+], ec:1.2.1.16 - dehydrogenase [NAD(P)+]	2, 2	PANS_07_4_02439, PANS_99_15_01514, PANS_07_4_02439, PANS_99_15_01514
Oxidative phosphorylation	map00190	2	ec:1.3.5.1 - dehydrogenase, ec:7.1.1.2 - reductase (H+-translocating)	4, 2	PANS_07_4_02214, PNA_03_3_00115, PANS_07_4_02213, PNA_03_3_00116, PANS_07_4_02146, PNA_03_3_01624
Phosphatidylinositol signaling system	map04070	2	ec:3.1.3.25 - phosphatase, ec:2.7.1.107 - kinase (ATP)	2, 2	PANS_07_4_01843, PNA_03_3_01876, PANS_07_4_03508, NCPPB2281_02946
Starch and sucrose metabolism	map00500	2	ec:2.7.1.2 - glucokinase (phosphorylating), ec:2.7.1.1 - hexokinase type IV glucokinase	2, 2	PNA_03_3_01747, PANS_07_4_01971, PNA_03_3_01747, PANS_07_4_01971
Alanine, aspartate and glutamate metabolism	map00250	2	ec:1.2.1.24 - dehydrogenase (NAD+), ec:1.2.1.16 - dehydrogenase [NAD(P)+]	2, 2	PANS_07_4_02439, PANS_99_15_01514, PANS_07_4_02439, PANS_99_15_01514
Fructose and mannose metabolism	map00051	2	ec:3.1.3.70 - phosphatase, ec:2.7.1.1 - hexokinase type IV glucokinase	2, 2	NCPPB2282_01320, PNA_15_2_02013, PNA_03_3_01747, PANS_07_4_01971
Pentose and glucuronate interconversions	map00040	2	ec:5.3.1.17 - isomerase, ec:1.1.1.130 - 2-dehydrogenase	2, 2	PANS_07_14_01798, LMG2632_03032, PANS_07_4_03408, NCPPB2275_01101
Thiamine metabolism	map00730	2	ec:3.6.1.15 - phosphatase, ec:2.8.1.7 - desulfurase	26, 2	PNA_03_3_03376, PANS_99_15_03254, PANS_07_4_03260, NCPPB2275_03801, NCPPB2275_00598, NCPPB2275_02755, PANS_07_4_01817, PANS_07_4_02356, NCPPB2275_02780, PANS_07_4_03243, PANS_07_4_00133, PANS_07_14_00798, PANS_99_15_00796, PNA_15_2_02119, PNA_03_3_00258, NCPPB2281_02937, PANS_07_4_00168, PNA_03_3_01906, PANS_07_10_02665, PANS_07_14_01291, PNA_14_11_01866, PNA_03_3_03370, PANS_07_4_03079, PANS_07_…
Carbon fixation in photosynthetic organisms	map00710	2	ec:1.1.1.39 - dehydrogenase (decarboxylating), ec:1.1.1.40 - dehydrogenase (oxaloacetate-decarboxylating) (NADP+)	2, 2	PANS_07_4_00002, PNA_03_3_01542, PANS_07_4_00002, PNA_03_3_01542
Glyoxylate and dicarboxylate metabolism	map00630	1	ec:2.3.3.1 - (Si)-synthase	2	PNA_14_11_03132, PNA_03_3_00112
Glutathione metabolism	map00480	1	ec:1.11.1.9 - peroxidase	2	NCPPB2275_00028, PANS_07_4_00881
Caffeine metabolism	map00232	1	ec:1.7.3.3 - urate hydroxylase	2	NCPPB1562_02736, NCPPB2281_02359
alpha-Linolenic acid metabolism	map00592	1	ec:2.3.1.16 - C-acyltransferase	2	PNA_03_3_01683, PANS_07_4_02087
Lipopolysaccharide biosynthesis	map00540	1	ec:3.1.3.45 - ec:3.1.3.45 3-deoxy-manno-octulosonate-8-phosphatase	2	PANS_07_4_03257, NCPPB2275_01042
Styrene degradation	map00643	1	ec:3.5.1.4 - acylamidase	2	NCPPB2275_00268, PANS_07_4_01137
Fatty acid elongation	map00062	1	ec:2.3.1.16 - C-acyltransferase	2	PNA_03_3_01683, PANS_07_4_02087
Valine, leucine and isoleucine degradation	map00280	1	ec:2.3.1.16 - C-acyltransferase	2	PNA_03_3_01683, PANS_07_4_02087
Biosynthesis of unsaturated fatty acids	map01040	1	ec:2.3.1.16 - C-acyltransferase	2	PNA_03_3_01683, PANS_07_4_02087
Metabolism of xenobiotics by cytochrome P450	map00980	1	ec:1.2.1.5 - dehydrogenase [NAD(P)+]	2	PANS_07_4_02439, PANS_99_15_01514
Aminoacyl-tRNA biosynthesis	map00970	1	ec:6.1.1.20 - ligase	2	NCPPB2275_00032, PANS_07_4_00885
Aminobenzoate degradation	map00627	1	ec:3.5.1.4 - acylamidase	2	NCPPB2275_00268, PANS_07_4_01137
Histidine metabolism	map00340	1	ec:1.2.1.5 - dehydrogenase [NAD(P)+]	2	PANS_07_4_02439, PANS_99_15_01514
Cysteine and methionine metabolism	map00270	1	ec:2.3.1.184 - synthase	2	PANS_07_4_02448, PNA_03_3_00351
Polyketide sugar unit biosynthesis	map00523	1	ec:5.1.3.13 - 3,5-epimerase	2	NCPPB2275_02660, PANS_07_4_00050
Inositol phosphate metabolism	map00562	1	ec:3.1.3.25 - phosphatase	2	PANS_07_4_01843, PNA_03_3_01876
PD-L1 expression and PD-1 checkpoint pathway in cancer	map05235	1	ec:3.1.3.16 - phosphatase	2	PANS_07_10_00645, NCPPB2275_02807
beta-Alanine metabolism	map00410	1	ec:1.2.1.5 - dehydrogenase [NAD(P)+]	2	PANS_07_4_02439, PANS_99_15_01514
Fatty acid degradation	map00071	1	ec:2.3.1.16 - C-acyltransferase	2	PNA_03_3_01683, PANS_07_4_02087
Th1 and Th2 cell differentiation	map04658	1	ec:3.1.3.16 - phosphatase	2	PANS_07_10_00645, NCPPB2275_02807
T cell receptor signaling pathway	map04660	1	ec:3.1.3.16 - phosphatase	2	PANS_07_10_00645, NCPPB2275_02807
Ethylbenzene degradation	map00642	1	ec:2.3.1.16 - C-acyltransferase	2	PNA_03_3_01683, PANS_07_4_02087
Lysine degradation	map00310	1	ec:2.3.1.61 - succinyltransferase	2	NCPPB2275_00553, PANS_07_10_01389
Phenylalanine, tyrosine and tryptophan biosynthesis	map00400	1	ec:2.5.1.54 - synthase	2	NCPPB2275_00530, PANS_07_14_00439
Glycerolipid metabolism	map00561	1	ec:2.7.1.107 - kinase (ATP)	2	PANS_07_4_03508, NCPPB2281_02946
Arginine biosynthesis	map00220	1	ec:3.5.1.16 - deacetylase	2	NCPPB2281_02725, PANS_07_4_03193
Arachidonic acid metabolism	map00590	1	ec:1.11.1.9 - peroxidase	2	NCPPB2275_00028, PANS_07_4_00881
Drug metabolism - cytochrome P450	map00982	1	ec:1.2.1.5 - dehydrogenase [NAD(P)+]	2	PANS_07_4_02439, PANS_99_15_01514
Benzoate degradation	map00362	1	ec:2.3.1.16 - C-acyltransferase	2	PNA_03_3_01683, PANS_07_4_02087
Terpenoid backbone biosynthesis	map00900	1	ec:5.3.3.2 - Delta-isomerase	2	PNA_03_3_00191, PANS_07_4_02289
Ubiquinone and other terpenoid-quinone biosynthesis	map00130	1	ec:1.6.5.2 - dehydrogenase (quinone)	4	PNA_03_3_01618, PNA_03_3_01624, PANS_07_4_02152, PANS_07_4_02146
Glycerophospholipid metabolism	map00564	1	ec:2.7.1.107 - kinase (ATP)	2	PANS_07_4_03508, NCPPB2281_02946
O-Antigen nucleotide sugar biosynthesis	map00541	1	ec:5.1.3.13 - 3,5-epimerase	2	NCPPB2275_02660, PANS_07_4_00050
Carbon fixation pathways in prokaryotes	map00720	1	ec:1.3.5.1 - dehydrogenase	4	PANS_07_4_02214, PNA_03_3_00115, PANS_07_4_02213, PNA_03_3_00116
Geraniol degradation	map00281	1	ec:2.3.1.16 - C-acyltransferase	2	PNA_03_3_01683, PANS_07_4_02087
Ascorbate and aldarate metabolism	map00053	1	ec:1.1.1.130 - 2-dehydrogenase	2	PANS_07_4_03408, NCPPB2275_01101
Pentose phosphate pathway	map00030	1	ec:4.1.2.4 - aldolase	2	PANS_07_4_01506, NCPPB2275_03734
Peptidoglycan biosynthesis	map00550	1	ec:3.4.16.4 - D-Ala-D-Ala carboxypeptidase	2	PNA_03_3_00062, PANS_07_4_03068

## Sheet: S6
Table S6: List of genes in P. stewartii subs. indologenes that Scoary predicted to be associated with red onion scale clearing phenotype
Gene	Number_pos_present_in	Number_neg_present_in	Number_pos_not_present_in	Number_neg_not_present_in	Sensitivity	Specificity	Odds_ratio	Naive_p	Bonferroni_p	Benjamini_H_p	Max_Pairwise_comparisons	Max_supporting_pairs	Max_opposing_pairs	Best_pairwise_comp_p	Worst_pairwise_comp_p
54181_tufB.faa	4	0	0	13	100	100	inf	0.000420168	1	0.243978	2	2	0	0.5	0.5
57054_hypothetical_protein.faa	4	0	0	13	100	100	inf	0.000420168	1	0.243978	2	2	0	0.5	0.5
51689_hypothetical_protein.faa	4	1	0	12	100	92.3077	inf	0.00210084	1	0.243978	2	2	0	0.5	0.5
70915_hypothetical_protein.faa	4	1	0	12	100	92.3077	inf	0.00210084	1	0.243978	2	2	0	0.5	0.5
70916_hypothetical_protein.faa	4	1	0	12	100	92.3077	inf	0.00210084	1	0.243978	2	2	0	0.5	0.5
54203_hypothetical_protein.faa	3	0	1	13	75	100	inf	0.00588235	1	0.243978	1	1	0	1	1
54206_hypothetical_protein.faa	3	0	1	13	75	100	inf	0.00588235	1	0.243978	1	1	0	1	1
54207_hypothetical_protein.faa	3	0	1	13	75	100	inf	0.00588235	1	0.243978	1	1	0	1	1
54231_nhaA_3.faa	3	0	1	13	75	100	inf	0.00588235	1	0.243978	1	1	0	1	1
54239_hypothetical_protein.faa	3	0	1	13	75	100	inf	0.00588235	1	0.243978	1	1	0	1	1
54519_hypothetical_protein.faa	3	0	1	13	75	100	inf	0.00588235	1	0.243978	1	1	0	1	1
54530_hypothetical_protein.faa	3	0	1	13	75	100	inf	0.00588235	1	0.243978	1	1	0	1	1
54531_hypothetical_protein.faa	3	0	1	13	75	100	inf	0.00588235	1	0.243978	1	1	0	1	1
54536_hypothetical_protein.faa	3	0	1	13	75	100	inf	0.00588235	1	0.243978	1	1	0	1	1
54537_pknD_3.faa	3	0	1	13	75	100	inf	0.00588235	1	0.243978	1	1	0	1	1
54538_hypothetical_protein.faa	3	0	1	13	75	100	inf	0.00588235	1	0.243978	1	1	0	1	1
54546_hypothetical_protein.faa	3	0	1	13	75	100	inf	0.00588235	1	0.243978	1	1	0	1	1
54547_hypothetical_protein.faa	3	0	1	13	75	100	inf	0.00588235	1	0.243978	1	1	0	1	1
54548_hypothetical_protein.faa	3	0	1	13	75	100	inf	0.00588235	1	0.243978	1	1	0	1	1
54549_hypothetical_protein.faa	3	0	1	13	75	100	inf	0.00588235	1	0.243978	1	1	0	1	1
54550_hypothetical_protein.faa	3	0	1	13	75	100	inf	0.00588235	1	0.243978	1	1	0	1	1
54552_hypothetical_protein.faa	3	0	1	13	75	100	inf	0.00588235	1	0.243978	1	1	0	1	1
54558_hypothetical_protein.faa	3	0	1	13	75	100	inf	0.00588235	1	0.243978	1	1	0	1	1
54560_hypothetical_protein.faa	3	0	1	13	75	100	inf	0.00588235	1	0.243978	1	1	0	1	1
54561_hypothetical_protein.faa	3	0	1	13	75	100	inf	0.00588235	1	0.243978	1	1	0	1	1
54562_cspA.faa	3	0	1	13	75	100	inf	0.00588235	1	0.243978	1	1	0	1	1
54563_hypothetical_protein.faa	3	0	1	13	75	100	inf	0.00588235	1	0.243978	1	1	0	1	1
54833_hypothetical_protein.faa	3	0	1	13	75	100	inf	0.00588235	1	0.243978	1	1	0	1	1
54887_hypothetical_protein.faa	3	0	1	13	75	100	inf	0.00588235	1	0.243978	1	1	0	1	1
54888_hypothetical_protein.faa	3	0	1	13	75	100	inf	0.00588235	1	0.243978	1	1	0	1	1
54889_hypothetical_protein.faa	3	0	1	13	75	100	inf	0.00588235	1	0.243978	1	1	0	1	1
54890_hypothetical_protein.faa	3	0	1	13	75	100	inf	0.00588235	1	0.243978	1	1	0	1	1
54891_hypothetical_protein.faa	3	0	1	13	75	100	inf	0.00588235	1	0.243978	1	1	0	1	1
54892_hypothetical_protein.faa	3	0	1	13	75	100	inf	0.00588235	1	0.243978	1	1	0	1	1
54893_hypothetical_protein.faa	3	0	1	13	75	100	inf	0.00588235	1	0.243978	1	1	0	1	1
54894_hypothetical_protein.faa	3	0	1	13	75	100	inf	0.00588235	1	0.243978	1	1	0	1	1
54895_hypothetical_protein.faa	3	0	1	13	75	100	inf	0.00588235	1	0.243978	1	1	0	1	1
54896_hypothetical_protein.faa	3	0	1	13	75	100	inf	0.00588235	1	0.243978	1	1	0	1	1
54897_hypothetical_protein.faa	3	0	1	13	75	100	inf	0.00588235	1	0.243978	1	1	0	1	1
54898_hypothetical_protein.faa	3	0	1	13	75	100	inf	0.00588235	1	0.243978	1	1	0	1	1
54903_hypothetical_protein.faa	3	0	1	13	75	100	inf	0.00588235	1	0.243978	1	1	0	1	1
54904_hypothetical_protein.faa	3	0	1	13	75	100	inf	0.00588235	1	0.243978	1	1	0	1	1
54976_hypothetical_protein.faa	3	0	1	13	75	100	inf	0.00588235	1	0.243978	1	1	0	1	1
55358_hypothetical_protein.faa	3	0	1	13	75	100	inf	0.00588235	1	0.243978	1	1	0	1	1
55359_aaaT_1.faa	3	0	1	13	75	100	inf	0.00588235	1	0.243978	1	1	0	1	1
55699_hypothetical_protein.faa	3	0	1	13	75	100	inf	0.00588235	1	0.243978	1	1	0	1	1
55700_yadV_2.faa	3	0	1	13	75	100	inf	0.00588235	1	0.243978	1	1	0	1	1
55725_hypothetical_protein.faa	3	0	1	13	75	100	inf	0.00588235	1	0.243978	1	1	0	1	1
55819_tsr_1.faa	3	0	1	13	75	100	inf	0.00588235	1	0.243978	1	1	0	1	1
55849_hypothetical_protein.faa	3	0	1	13	75	100	inf	0.00588235	1	0.243978	1	1	0	1	1
56185_malQ_1.faa	3	0	1	13	75	100	inf	0.00588235	1	0.243978	1	1	0	1	1
56634_hypothetical_protein.faa	3	0	1	13	75	100	inf	0.00588235	1	0.243978	1	1	0	1	1
57027_hypothetical_protein.faa	3	0	1	13	75	100	inf	0.00588235	1	0.243978	1	1	0	1	1
57038_hypothetical_protein.faa	3	0	1	13	75	100	inf	0.00588235	1	0.243978	1	1	0	1	1
57039_hypothetical_protein.faa	3	0	1	13	75	100	inf	0.00588235	1	0.243978	1	1	0	1	1
57040_hypothetical_protein.faa	3	0	1	13	75	100	inf	0.00588235	1	0.243978	1	1	0	1	1
57041_hypothetical_protein.faa	3	0	1	13	75	100	inf	0.00588235	1	0.243978	1	1	0	1	1
57478_hypothetical_protein.faa	3	0	1	13	75	100	inf	0.00588235	1	0.243978	1	1	0	1	1
57513_hypothetical_protein.faa	3	0	1	13	75	100	inf	0.00588235	1	0.243978	1	1	0	1	1
58000_hypothetical_protein.faa	3	0	1	13	75	100	inf	0.00588235	1	0.243978	1	1	0	1	1
58211_hypothetical_protein.faa	3	0	1	13	75	100	inf	0.00588235	1	0.243978	1	1	0	1	1
58212_hypothetical_protein.faa	3	0	1	13	75	100	inf	0.00588235	1	0.243978	1	1	0	1	1
58213_hypothetical_protein.faa	3	0	1	13	75	100	inf	0.00588235	1	0.243978	1	1	0	1	1
58220_pdxH_2.faa	3	0	1	13	75	100	inf	0.00588235	1	0.243978	1	1	0	1	1
58221_dltA.faa	3	0	1	13	75	100	inf	0.00588235	1	0.243978	1	1	0	1	1
58222_hypothetical_protein.faa	3	0	1	13	75	100	inf	0.00588235	1	0.243978	1	1	0	1	1
58223_pgk-tpi.faa	3	0	1	13	75	100	inf	0.00588235	1	0.243978	1	1	0	1	1
58225_hypothetical_protein.faa	3	0	1	13	75	100	inf	0.00588235	1	0.243978	1	1	0	1	1
58226_pphA.faa	4	0	0	13	100	100	inf	0.000420168	1	0.243978	2	2	0	0.5	0.5
58227_Hydroxypyruvate_redu...faa	3	0	1	13	75	100	inf	0.00588235	1	0.243978	1	1	0	1	1
58228_argC_1.faa	3	0	1	13	75	100	inf	0.00588235	1	0.243978	1	1	0	1	1
58229_lgoD_1.faa	3	0	1	13	75	100	inf	0.00588235	1	0.243978	1	1	0	1	1
58230_hypothetical_protein.faa	3	0	1	13	75	100	inf	0.00588235	1	0.243978	1	1	0	1	1
58231_rhtC_1.faa	3	0	1	13	75	100	inf	0.00588235	1	0.243978	1	1	0	1	1
69147_yadV_2.faa	1	13	3	0	25	0	0	0.00588235	1	0.243978	1	0	1	1	1
69261_trg_2.faa	1	13	3	0	25	0	0	0.00588235	1	0.243978	1	0	1	1	1
69289_hypothetical_protein.faa	1	13	3	0	25	0	0	0.00588235	1	0.243978	1	0	1	1	1
70776_aaaT_1.faa	1	13	3	0	25	0	0	0.00588235	1	0.243978	1	0	1	1	1
13925_yddG_1.faa	4	2	0	11	100	84.6154	inf	0.00630252	1	0.243978	2	2	0	0.5	0.5
15771_hypothetical_protein.faa	4	2	0	11	100	84.6154	inf	0.00630252	1	0.243978	2	2	0	0.5	0.5
29672_crcB_2.faa	4	2	0	11	100	84.6154	inf	0.00630252	1	0.243978	2	2	0	0.5	0.5
29674_eno_2.faa	4	2	0	11	100	84.6154	inf	0.00630252	1	0.243978	2	2	0	0.5	0.5
29675_uspA_2.faa	4	2	0	11	100	84.6154	inf	0.00630252	1	0.243978	2	2	0	0.5	0.5
29676_ppaC.faa	4	2	0	11	100	84.6154	inf	0.00630252	1	0.243978	2	2	0	0.5	0.5
68170_hypothetical_protein.faa	0	11	4	2	0	15.3846	0	0.00630252	1	0.243978	2	0	2	0.5	0.5
7176_hypothetical_protein.faa	4	2	0	11	100	84.6154	inf	0.00630252	1	0.243978	2	2	0	0.5	0.5
7177_hypothetical_protein.faa	4	2	0	11	100	84.6154	inf	0.00630252	1	0.243978	2	2	0	0.5	0.5
7179_hypothetical_protein.faa	4	2	0	11	100	84.6154	inf	0.00630252	1	0.243978	2	2	0	0.5	0.5
7180_dITP-XTP_pyrophospha...faa	4	2	0	11	100	84.6154	inf	0.00630252	1	0.243978	2	2	0	0.5	0.5
790_hypothetical_protein.faa	0	11	4	2	0	15.3846	0	0.00630252	1	0.243978	2	0	2	0.5	0.5
14614_hypothetical_protein.faa	4	3	0	10	100	76.9231	inf	0.0147059	1	0.522809	2	2	0	0.5	0.5
14615_hypothetical_protein.faa	4	3	0	10	100	76.9231	inf	0.0147059	1	0.522809	2	2	0	0.5	0.5
14616_hypothetical_protein.faa	4	3	0	10	100	76.9231	inf	0.0147059	1	0.522809	2	2	0	0.5	0.5
14617_hypothetical_protein.faa	4	3	0	10	100	76.9231	inf	0.0147059	1	0.522809	2	2	0	0.5	0.5
4932_hypothetical_protein.faa	4	3	0	10	100	76.9231	inf	0.0147059	1	0.522809	2	2	0	0.5	0.5
6181_hypothetical_protein.faa	4	3	0	10	100	76.9231	inf	0.0147059	1	0.522809	2	2	0	0.5	0.5
69045_hypothetical_protein.faa	0	10	4	3	0	23.0769	0	0.0147059	1	0.522809	2	0	2	0.5	0.5
832_hypothetical_protein.faa	0	10	4	3	0	23.0769	0	0.0147059	1	0.522809	2	0	2	0.5	0.5
13136_hypothetical_protein.faa	3	1	1	12	75	92.3077	36	0.0222689	1	0.669742	2	1	1	1	1
13788_hypothetical_protein.faa	3	1	1	12	75	92.3077	36	0.0222689	1	0.669742	1	1	1	1	1
14619_hypothetical_protein.faa	3	1	1	12	75	92.3077	36	0.0222689	1	0.669742	1	1	1	1	1
14625_hypothetical_protein.faa	3	1	1	12	75	92.3077	36	0.0222689	1	0.669742	1	1	1	1	1
15764_hypothetical_protein.faa	3	1	1	12	75	92.3077	36	0.0222689	1	0.669742	1	1	1	1	1
15809_lpp.faa	3	1	1	12	75	92.3077	36	0.0222689	1	0.669742	1	1	1	1	1
3789_intA_4.faa	1	12	3	1	25	7.69231	0.0277778	0.0222689	1	0.669742	2	1	1	1	1
45715_hypothetical_protein.faa	3	1	1	12	75	92.3077	36	0.0222689	1	0.669742	2	1	1	1	1
49769_hypothetical_protein.faa	3	1	1	12	75	92.3077	36	0.0222689	1	0.669742	2	1	1	1	1
68459_hypothetical_protein.faa	3	1	1	12	75	92.3077	36	0.0222689	1	0.669742	2	1	1	1	1
70640_hypothetical_protein.faa	3	1	1	12	75	92.3077	36	0.0222689	1	0.669742	2	1	1	1	1
70864_hypothetical_protein.faa	1	12	3	1	25	7.69231	0.0277778	0.0222689	1	0.669742	2	1	1	1	1
71314_hypothetical_protein.faa	1	12	3	1	25	7.69231	0.0277778	0.0222689	1	0.669742	2	1	1	1	1
13837_hypothetical_protein.faa	4	4	0	9	100	69.2308	inf	0.0294118	1	0.669742	2	2	0	0.5	0.5
13851_hypothetical_protein.faa	4	4	0	9	100	69.2308	inf	0.0294118	1	0.669742	2	2	0	0.5	0.5
17637_hypothetical_protein.faa	4	4	0	9	100	69.2308	inf	0.0294118	1	0.669742	2	2	0	0.5	0.5
517_hypothetical_protein.faa	4	4	0	9	100	69.2308	inf	0.0294118	1	0.669742	2	2	0	0.5	0.5
6069_hypothetical_protein.faa	4	4	0	9	100	69.2308	inf	0.0294118	1	0.669742	2	2	0	0.5	0.5
6182_hypothetical_protein.faa	4	4	0	9	100	69.2308	inf	0.0294118	1	0.669742	2	2	0	0.5	0.5
6183_macB.faa	4	4	0	9	100	69.2308	inf	0.0294118	1	0.669742	2	2	0	0.5	0.5
6184_yknY.faa	4	4	0	9	100	69.2308	inf	0.0294118	1	0.669742	2	2	0	0.5	0.5
6185_hypothetical_protein.faa	4	4	0	9	100	69.2308	inf	0.0294118	1	0.669742	2	2	0	0.5	0.5
6396_hypothetical_protein.faa	4	4	0	9	100	69.2308	inf	0.0294118	1	0.669742	2	2	0	0.5	0.5
6397_cntI.faa	4	4	0	9	100	69.2308	inf	0.0294118	1	0.669742	2	2	0	0.5	0.5
6398_hypothetical_protein.faa	4	4	0	9	100	69.2308	inf	0.0294118	1	0.669742	2	2	0	0.5	0.5
6399_ilvB.faa	4	4	0	9	100	69.2308	inf	0.0294118	1	0.669742	2	2	0	0.5	0.5
6401_hypothetical_protein.faa	4	4	0	9	100	69.2308	inf	0.0294118	1	0.669742	2	2	0	0.5	0.5
6402_bacA.faa	4	4	0	9	100	69.2308	inf	0.0294118	1	0.669742	2	2	0	0.5	0.5
6403_ddl_1.faa	4	4	0	9	100	69.2308	inf	0.0294118	1	0.669742	2	2	0	0.5	0.5
67909_hypothetical_protein.faa	0	9	4	4	0	30.7692	0	0.0294118	1	0.669742	2	0	2	0.5	0.5
67929_hypothetical_protein.faa	0	9	4	4	0	30.7692	0	0.0294118	1	0.669742	2	0	2	0.5	0.5
67930_vapC.faa	0	9	4	4	0	30.7692	0	0.0294118	1	0.669742	2	0	2	0.5	0.5
67954_hypothetical_protein.faa	0	9	4	4	0	30.7692	0	0.0294118	1	0.669742	2	0	2	0.5	0.5
67955_exuT_3.faa	0	9	4	4	0	30.7692	0	0.0294118	1	0.669742	2	0	2	0.5	0.5
67956_hypothetical_protein.faa	0	9	4	4	0	30.7692	0	0.0294118	1	0.669742	2	0	2	0.5	0.5
67957_hypothetical_protein.faa	0	9	4	4	0	30.7692	0	0.0294118	1	0.669742	2	0	2	0.5	0.5
67958_hypothetical_protein.faa	0	9	4	4	0	30.7692	0	0.0294118	1	0.669742	2	0	2	0.5	0.5
67959_hypothetical_protein.faa	0	9	4	4	0	30.7692	0	0.0294118	1	0.669742	2	0	2	0.5	0.5
67960_hypothetical_protein.faa	0	9	4	4	0	30.7692	0	0.0294118	1	0.669742	2	0	2	0.5	0.5
67961_acpP_2.faa	0	9	4	4	0	30.7692	0	0.0294118	1	0.669742	2	0	2	0.5	0.5
67962_hypothetical_protein.faa	0	9	4	4	0	30.7692	0	0.0294118	1	0.669742	2	0	2	0.5	0.5
67963_dltA.faa	0	9	4	4	0	30.7692	0	0.0294118	1	0.669742	2	0	2	0.5	0.5
67964_hypothetical_protein.faa	0	9	4	4	0	30.7692	0	0.0294118	1	0.669742	2	0	2	0.5	0.5
67965_hypothetical_protein.faa	0	9	4	4	0	30.7692	0	0.0294118	1	0.669742	2	0	2	0.5	0.5
67966_hypothetical_protein.faa	0	9	4	4	0	30.7692	0	0.0294118	1	0.669742	2	0	2	0.5	0.5
67967_lolA_2.faa	0	9	4	4	0	30.7692	0	0.0294118	1	0.669742	2	0	2	0.5	0.5
67968_hypothetical_protein.faa	0	9	4	4	0	30.7692	0	0.0294118	1	0.669742	2	0	2	0.5	0.5
67970_fabF_2.faa	0	9	4	4	0	30.7692	0	0.0294118	1	0.669742	2	0	2	0.5	0.5
67971_hypothetical_protein.faa	0	9	4	4	0	30.7692	0	0.0294118	1	0.669742	2	0	2	0.5	0.5
67972_fabG_7.faa	0	9	4	4	0	30.7692	0	0.0294118	1	0.669742	2	0	2	0.5	0.5
67973_fabF_3.faa	0	9	4	4	0	30.7692	0	0.0294118	1	0.669742	2	0	2	0.5	0.5
67974_hypothetical_protein.faa	0	9	4	4	0	30.7692	0	0.0294118	1	0.669742	2	0	2	0.5	0.5
68183_hypothetical_protein.faa	4	4	0	9	100	69.2308	inf	0.0294118	1	0.669742	2	2	0	0.5	0.5
70075_hypothetical_protein.faa	4	4	0	9	100	69.2308	inf	0.0294118	1	0.669742	2	2	0	0.5	0.5
7855_hypothetical_protein.faa	0	9	4	4	0	30.7692	0	0.0294118	1	0.669742	2	0	2	0.5	0.5
55726_hypothetical_protein.faa	2	0	2	13	50	100	inf	0.0441176	1	0.687907	1	1	0	1	1

## Sheet: S7
Table S7: Blast output of Psi genes identified to be associated with red onion scale clearing phenotype showing localisation in PNA-97-1R genome
Gene number	qseqid		sseqid	pidentity	alignment_length	mismatch	gapopen	qstart (alignment)	qend (alignment)	sstart (alignment)	send (alignment)	evalue	bitscore
Gene 1	PNA.14.11_pdxH_2		NZ_CP020943.2	35.912	181	115	1	1	181	2552685	2552146	2.9e-28	108
Gene 2	PNA.14.11_dltA		NZ_CP020943.2	21.849	357	235	10	135	475	1980745	1981731	9.59e-12	67
Gene 3	PNA.14.11_MFS_transporter		NZ_CP020943.2	42.553	47	21	1	2	48	4181246	4181368	0.002	38.1
Gene 4	PNA.14.11_pgk/tpi		NZ_CP020943.2	31.481	54	30	2	54	103	4163666	4163514	0.71	29.3
Gene 5	PNA.14.11_FAD/NAD(P)		NZ_CP020943.2	26.523	279	162	11	1	268	3292574	3293314	4.36e-08	54.3
Gene 6	PNA.14.11_pphA		NZ_CP020943.2	36.014	286	166	5	3	272	833004	833858	2e-47	167
Gene 7	PNA.14.11_Hydroxypyruvate		NZ_CP020943.2	32.5	280	176	6	49	320	15445	14621	2.25e-34	130
Gene 8	PNA.14.11_argC_1		NZ_CP020943.2	28.532	361	220	11	1	350	210057	211058	6.21e-35	133
Gene 9	PNA.14.11_lgoD_1		NZ_CP020943.2	26.599	297	191	8	1	278	3884101	3883235	3.88e-17	80.1
Gene 10	PNA.14.11_Fe_cont_alcohol_dehydrogenase		NZ_CP020943.2	29.249	253	167	5	95	335	3266738	3267496	1.8e-23	100
Gene 11	PNA.14.11_rhtC_1		NZ_CP020944.2	55.738	183	81	0	1	183	259738	260286	2.72e-48	166
